# Supplementary material for: Quantitative proteomics reveals key roles for post-transcriptional gene regulation in the molecular pathology of FSHD
Source: bioRxiv preprint, doi:10.1101/417790, version 3 (2019-01-04)
Supplement: Supplemental File 2 [file 417790_file04.xlsx]

## Sheet: Supp data 2_data.rnaseq.silac.s
	iDUX4	Inducible DUX4 in MB135 cells
	vDUX4	Virally expressed DUX4 in MB135 cells
	logFC	log2 fold change (DUX4/Control)
	logCPM	the average log2-counts-per-million
	LR	likelihood ratio statistics
	pval	the two-sided p-value
	fdr	adjusted p-value
	hl.ratio	log2 fold change (DUX4/Control)
	IQR	Inter quartile range
	QCOD	Quartile Coefficient of Deviation
	count	Number of peptide spectrum matches for a gene in a sample
		RNA-seq data for viral DUX4										RNA-seq data for inducible DUX4										Proteomics data for viral DUX4								Proteomics data for indicuble DUX4
		Filtered for low read counts (cpm)					Unfiltered for low read counts (cpm)					Filtered for low read counts (cpm)					Unfiltered for low read counts (cpm)					24 hours of DUX4 expression				36 hours of DUX4 expression				14 hours of DUX4 expression - replicate 1				14 hours of DUX4 expression - replicate 2				Combined values for Replicates 1 and 2
	geneid	vDUX4_logFC	vDUX4_logCPM	vDUX4_LR	vDUX4_pval	vDUX4_fdr	vDUX4_logFC_UF	vDUX4_logCPM_UF	vDUX4_LR_UF	vDUX4_pval_UF	vDUX4_fdr_UF	iDUX4_logFC	iDUX4_logCPM	iDUX4_LR	iDUX4_pval	iDUX4_fdr	iDUX4_logFC_UF	iDUX4_logCPM_UF	iDUX4_LR_UF	iDUX4_pval_UF	iDUX4_fdr_UF	hl.ratio.rep1	IQR.rep1	QCoD.rep1	count.rep1	hl.ratio.rep2	IQR.rep2	QCoD.rep2	count.rep2	hl.ratio.rep3	IQR.rep3	QCoD.rep3	count.rep3	hl.ratio.rep4	IQR.rep4	QCoD.rep4	count.rep4	hl.ratio	area	protein.length	rep	IQR	QCoD	count	mean	sd	zscore	pval
1	RFPL1	12.587	9.20282	105.269	1.07e-24	4.03e-22	12.587	9.20121	105.188	1.11059e-24	6.87357e-22	9.36633	8.56834	2910.21	0	0	9.36621	8.56686	2906.39	0	0	8.36502	0.933619	0.11161	2	12.2412	0.853786	0.0697472	3	4.67197	0.979764	0.209711	6	4.27417	2.7284	0.638346	19	4.41528	222742	317	3.76	1.95224	0.442156	25	0.0123812	0.167962	26.2137	1.85677e-151
2	DUXA	13.4723	9.45437	204.1	2.66e-46	3.8e-43	13.4723	9.45277	204.517	2.1581e-46	5.04588e-43	8.72852	9.74024	5195.46	0	0	8.72839	9.73876	5198.46	0	0	15.3069	0.476873	0.031154	5	9.07866	5.09503	0.561209	7	8.32947	6.89718	0.828045	16	9.33831	5.45853	0.584531	16	8.91954	3.52346e+06	204	3.5	6.43592	0.721553	32	-0.00495446	0.140578	63.4843	0
3	RFPL2	13.8259	10.1675	204.621	2.05e-46	3.29e-43	13.8259	10.1659	204.956	1.73176e-46	4.55517e-43	8.58283	9.76092	4397.05	0	0	8.58269	9.75943	4380.73	0	0	NA	NA	NA	NA	NA	NA	NA	NA	3.56185	0	0	1	2.85317	2.45174	0.859302	8	3.03226	119469	378	3.88889	1.69472	0.558899	9	-0.000723765	0.289445	10.4786	1.08321e-25
4	LEUTX	12.7379	8.7235	179.31	6.85e-41	8.01e-38	12.7379	8.7219	179.627	5.84486e-41	1.11812e-37	8.13615	8.70269	3276.44	0	0	8.13602	8.70121	3278.76	0	0	NA	NA	NA	NA	12.0601	0.147753	0.0122514	2	6.79014	5.68335	0.837	4	8.26188	3.40288	0.411877	2	7.15163	1.57914e+06	168	3.33333	5.30305	0.741516	6	0.0124072	0.380082	18.7834	1.03279e-78
5	RFPL3S	9.3219	6.25613	100.608	1.12e-23	3.79e-21	9.32197	6.25453	100.6	1.12547e-23	6.23246e-21	8.03189	5.56371	392.902	1.93e-87	8.64e-86	8.03178	5.56225	392.875	1.95909e-87	1.51563e-85	NA	NA	NA	NA	NA	NA	NA	NA	NA	NA	NA	NA	NA	NA	NA	NA	NA	NA	NA	NA	NA	NA	NA	NA	NA	NA	NA
6	ZSCAN5C	10.2301	6.29305	56.8392	4.73e-14	6.47e-12	10.2301	6.29144	56.7532	4.94096e-14	1.10609e-11	7.83738	6.53258	777.109	5.12e-171	5.76e-169	7.83725	6.53111	777.055	5.25833e-171	1.02455e-168	NA	NA	NA	NA	NA	NA	NA	NA	NA	NA	NA	NA	3.91009	0	0	1	3.91009	307344	496	4	0	0	1	0.0102818	2.0796	1.87527	0.0607558
7	USP29	8.64966	4.75675	84.3674	4.11e-20	1.02e-17	8.64971	4.75513	84.1628	4.55668e-20	1.87437e-17	7.7113	4.36803	162.939	2.58e-37	4.48e-36	7.71121	4.36658	162.927	2.5947e-37	7.80003e-36	NA	NA	NA	NA	NA	NA	NA	NA	NA	NA	NA	NA	NA	NA	NA	NA	NA	NA	NA	NA	NA	NA	NA	NA	NA	NA	NA
8	FAM189A2	7.51662	4.94652	74.2503	6.88e-18	1.36e-15	7.51669	4.9449	74.0335	7.6801e-18	2.44867e-15	7.68417	4.565	188.408	7.08e-43	1.46e-41	7.68407	4.56354	188.395	7.12457e-43	2.5282e-41	NA	NA	NA	NA	NA	NA	NA	NA	NA	NA	NA	NA	NA	NA	NA	NA	NA	NA	NA	NA	NA	NA	NA	NA	NA	NA	NA
9	CCNA1	10.7656	10.3801	133.732	6.25e-31	3.5e-28	10.7657	10.3785	133.719	6.29326e-31	5.75778e-28	7.66454	10.8118	7235.76	0	0	7.6644	10.8103	7232.44	0	0	NA	NA	NA	NA	NA	NA	NA	NA	5.13954	2.31343	0.450124	6	5.10787	2.96315	0.580115	15	5.10787	299048	465	3.71429	2.70936	0.53043	21	-0.00157686	0.183413	27.8576	8.70409e-171
10	ZNF280A	7.80084	5.3814	34.889	3.49e-09	2.16e-07	7.80093	5.37979	34.7726	3.70546e-09	3.74875e-07	7.55285	4.94282	247.66	8.41e-56	2.35e-54	7.55274	4.94136	247.642	8.48037e-56	4.10235e-54	NA	NA	NA	NA	NA	NA	NA	NA	NA	NA	NA	NA	NA	NA	NA	NA	NA	NA	NA	NA	NA	NA	NA	NA	NA	NA	NA
11	PRAMEF1	14.0911	10.071	107.188	4.05e-25	1.58e-22	14.0912	10.0694	107.08	4.27594e-25	2.72662e-22	7.53512	10.4755	4944.65	0	0	7.53499	10.4741	4917.25	0	0	NA	NA	NA	NA	NA	NA	NA	NA	6.4971	0.537161	0.082677	4	4.44959	2.12157	0.4768	6	4.81657	441418	474	3.6	2.15488	0.447389	10	-0.0100645	0.260818	18.5058	1.85467e-76
12	NT5C1B-RDH14	8.6064	5.18784	84.4836	3.87e-20	9.77e-18	8.60647	5.18622	84.1304	4.63182e-20	1.87437e-17	7.37665	5.87811	482.999	4.75e-107	2.71e-105	7.37652	5.87664	482.965	4.83655e-107	4.77819e-105	NA	NA	NA	NA	NA	NA	NA	NA	NA	NA	NA	NA	NA	NA	NA	NA	NA	NA	NA	NA	NA	NA	NA	NA	NA	NA	NA
13	TPRX1	9.45822	5.51423	114.801	8.7e-27	3.86e-24	9.45826	5.51262	114.37	1.08153e-26	7.58621e-24	7.28817	6.24391	608.115	2.88e-134	2.41e-132	7.28804	6.24243	604.534	1.7281e-133	2.45706e-131	NA	NA	NA	NA	NA	NA	NA	NA	7.34571	0	0	1	NA	NA	NA	NA	7.34571	664461	508	3	0	0	1	0.051942	2.10435	3.46605	0.00052816
14	PRAMEF12	14.2071	10.1869	210.354	1.15e-47	2.46e-44	14.2072	10.1853	210.723	9.55265e-48	3.35028e-44	7.25027	10.4579	5854.46	0	0	7.25013	10.4565	5841.09	0	0	NA	NA	NA	NA	12.4124	0	0	1	7.41038	2.77578	0.37458	29	7.7125	2.22674	0.288719	51	7.54952	935472	483	3.6375	2.56571	0.33985	80	0.00400918	0.0893354	84.4628	0
15	KLF17	7.12932	4.28413	58.1853	2.39e-14	3.3e-12	7.1294	4.28251	58.0112	2.60634e-14	5.89733e-12	7.17382	4.64687	196.756	1.07e-44	2.29e-43	7.17371	4.64541	196.742	1.07334e-44	3.99053e-43	NA	NA	NA	NA	NA	NA	NA	NA	NA	NA	NA	NA	NA	NA	NA	NA	NA	NA	NA	NA	NA	NA	NA	NA	NA	NA	NA
16	RFPL4B	15.1932	11.2963	247.896	7.47e-56	4.8e-52	15.1932	11.2947	248.412	5.76149e-56	6.06195e-52	7.16397	10.8846	8572.63	0	0	7.16383	10.8831	8617.15	0	0	14.5028	0.431076	0.0297238	3	7.21508	4.81169	0.666893	14	7.86535	2.43732	0.30988	29	7.2441	4.59273	0.633995	41	7.45597	1.42017e+06	263	3.58571	3.82464	0.512963	70	-0.00450935	0.0939372	79.4199	0
17	PRAMEF2	13.6467	9.62801	167.534	2.56e-38	2.53e-35	13.6467	9.62641	167.668	2.39013e-38	3.86888e-35	7.14972	9.77006	3376.98	0	0	7.14958	9.76857	3352.23	0	0	NA	NA	NA	NA	11.0378	1.12954	0.102334	2	7.15694	2.56591	0.358521	9	6.43923	2.00067	0.3107	19	6.60174	529868	474	3.67857	2.01521	0.305254	28	0.000648651	0.155239	42.5222	0
18	FAM46C	7.38106	4.73939	58.6205	1.91e-14	2.73e-12	7.38114	4.73777	58.4929	2.04026e-14	4.77034e-12	7.14527	5.42462	346.305	2.7e-77	1.07e-75	7.14515	5.42316	346.28	2.73615e-77	1.87546e-75	NA	NA	NA	NA	NA	NA	NA	NA	NA	NA	NA	NA	NA	NA	NA	NA	NA	NA	NA	NA	NA	NA	NA	NA	NA	NA	NA
19	KDM4E	12.8615	8.84634	167.011	3.33e-38	3.06e-35	12.8616	8.84474	167.222	2.99144e-38	4.49635e-35	7.13891	8.51632	2890.8	0	0	7.13877	8.51484	2892.36	0	0	NA	NA	NA	NA	NA	NA	NA	NA	7.38291	1.56748	0.212311	37	7.21607	2.03545	0.282073	40	7.34446	1.16392e+06	506	3.51948	1.96453	0.267484	77	-0.00139426	0.09247	79.4403	0
20	CXCR4	6.87652	3.44402	16.9617	3.81e-05	0.000697329	6.87658	3.44239	16.91	3.91954e-05	0.00117241	7.07285	3.66961	93.6198	3.82e-22	3.9e-21	7.07276	3.66816	93.6133	3.83594e-22	6.77178e-21	NA	NA	NA	NA	NA	NA	NA	NA	NA	NA	NA	NA	NA	NA	NA	NA	NA	NA	NA	NA	NA	NA	NA	NA	NA	NA	NA
21	WI2-2994D6.2	11.856	7.84907	163.889	1.6e-37	1.37e-34	11.856	7.84747	164.177	1.38387e-37	1.94139e-34	7.05859	8.76956	2298.69	0	0	7.05845	8.76807	2282.93	0	0	NA	NA	NA	NA	NA	NA	NA	NA	NA	NA	NA	NA	NA	NA	NA	NA	NA	NA	NA	NA	NA	NA	NA	NA	NA	NA	NA
22	TRIM43	16.4172	12.3944	256.898	8.14e-58	1.05e-53	16.4172	12.3928	257.323	6.57895e-58	1.38441e-53	7.05003	12.5955	13648.3	0	0	7.04989	12.594	13745.8	0	0	NA	NA	NA	NA	11.7688	4.07799	0.346509	13	8.98739	7.45697	0.829715	19	8.53339	3.5246	0.413037	20	8.60524	1.88407e+06	446	3.51282	5.25288	0.610428	39	0.00488531	0.129927	66.1937	0
23	KHDC1L	13.9283	10.0508	219.207	1.35e-49	3.47e-46	3.74057	1.53737	4.27264	0.0387308	0.226474	6.97775	10.2029	4754.96	0	0	2.73958	1.36432	4.15969	0.041397	0.110051	5.68604	1.58872	0.279407	3	5.11768	3.84034	0.750406	3	5.75319	2.96085	0.514644	13	8.14274	2.62844	0.322796	11	6.97288	1.25903e+06	128	3.45833	2.65521	0.380791	24	0.00688012	0.166538	41.8282	0
24	KHDC1L	13.9283	10.0508	219.207	1.35e-49	3.47e-46	13.9283	10.0492	219.672	1.06638e-49	4.48796e-46	6.97775	10.2029	4754.96	0	0	6.97762	10.2015	4733.81	0	0	5.68604	1.58872	0.279407	3	5.11768	3.84034	0.750406	3	5.75319	2.96085	0.514644	13	8.14274	2.62844	0.322796	11	6.97288	1.25903e+06	128	3.45833	2.65521	0.380791	24	0.00688012	0.166538	41.8282	0
25	DUXB	9.57298	5.69587	112.943	2.22e-26	9.21e-24	9.57303	5.69425	112.662	2.55935e-26	1.7373e-23	6.97595	5.649	404.076	7.14e-90	3.31e-88	6.97583	5.64753	404.047	7.24286e-90	5.83952e-88	NA	NA	NA	NA	NA	NA	NA	NA	NA	NA	NA	NA	NA	NA	NA	NA	NA	NA	NA	NA	NA	NA	NA	NA	NA	NA	NA
26	PRAMEF13	13.2985	9.32228	151.779	7.08e-35	5.06e-32	13.2986	9.32068	151.852	6.82454e-35	7.97826e-32	6.95895	9.47538	3242.19	0	0	6.95882	9.47389	3222.78	0	0	NA	NA	NA	NA	NA	NA	NA	NA	NA	NA	NA	NA	NA	NA	NA	NA	NA	NA	NA	NA	NA	NA	NA	NA	NA	NA	NA
27	PRAMEF6	12.135	8.12514	145.808	1.43e-33	9.68e-31	12.1351	8.12354	145.958	1.32574e-33	1.4683e-30	6.94969	9.08987	2531	0	0	6.94955	9.08839	2511.96	0	0	NA	NA	NA	NA	NA	NA	NA	NA	1.72523	0	0	1	6.53881	2.7747	0.424344	5	5.39883	385257	476	3.83333	3.63456	0.673213	6	-0.00100126	0.402384	13.4196	4.64233e-41
28	WI2-3308P17.2	9.36176	5.42085	66.7133	3.14e-16	5.24e-14	9.36181	5.41923	66.4855	3.52475e-16	9.63264e-14	6.94548	6.72034	861.325	2.51e-189	3.21e-187	6.94535	6.71886	861.263	2.58749e-189	5.67173e-187	NA	NA	NA	NA	NA	NA	NA	NA	NA	NA	NA	NA	NA	NA	NA	NA	NA	NA	NA	NA	NA	NA	NA	NA	NA	NA	NA
29	ZSCAN4	14.6501	10.9836	237.232	1.58e-53	6.77e-50	14.6501	10.982	237.707	1.24341e-53	8.72167e-50	6.93799	11.0898	8531.29	0	0	6.93785	11.0883	8559.31	0	0	13.3792	2.4131	0.180362	3	13.1055	1.1375	0.0867956	2	7.93339	4.60835	0.580881	52	8.54558	4.08283	0.477771	59	8.31409	1.32908e+06	433	3.53153	4.40365	0.529661	111	0.000473005	0.0783046	106.17	0
30	DPPA3	6.98524	3.31419	21.7024	3.18e-06	8.36e-05	6.98528	3.31256	21.6337	3.30004e-06	0.000141431	6.92988	4.4784	171.952	2.77e-39	5.14e-38	6.92977	4.47694	171.94	2.78883e-39	8.95958e-38	NA	NA	NA	NA	NA	NA	NA	NA	NA	NA	NA	NA	NA	NA	NA	NA	NA	NA	NA	NA	NA	NA	NA	NA	NA	NA	NA
31	HNRNPCL1	10.1674	6.1936	90.145	2.21e-21	6.47e-19	10.1675	6.19199	90.1033	2.26042e-21	1.08104e-18	6.85527	7.2772	1210.9	2.61e-265	5.38e-263	6.85513	7.27572	1204.78	5.58719e-264	1.99273e-261	NA	NA	NA	NA	NA	NA	NA	NA	7.87435	4.46691	0.567273	5	7.29051	2.36587	0.324514	4	7.87435	1.22743e+06	293	3.44444	4.03949	0.512993	9	-0.00417749	0.296243	26.5949	7.78263e-156
32	NEUROG2	5.47623	2.67011	16.6604	4.47e-05	0.000797436	5.47637	2.66847	16.5573	4.72017e-05	0.00136625	6.73765	3.55489	84.191	4.49e-20	4.07e-19	6.73756	3.55344	84.1851	4.50544e-20	7.05417e-19	NA	NA	NA	NA	NA	NA	NA	NA	NA	NA	NA	NA	NA	NA	NA	NA	NA	NA	NA	NA	NA	NA	NA	NA	NA	NA	NA
33	PRAMEF9	10.5678	6.58226	84.5104	3.82e-20	9.77e-18	10.5678	6.58065	84.4431	3.95438e-20	1.66424e-17	6.7262	7.42225	936.367	1.22e-205	1.7e-203	6.72607	7.42078	927.281	1.15181e-203	2.78592e-201	NA	NA	NA	NA	NA	NA	NA	NA	NA	NA	NA	NA	NA	NA	NA	NA	NA	NA	NA	NA	NA	NA	NA	NA	NA	NA	NA
34	EOMES	7.00417	3.72796	49.4348	2.05e-12	2.38e-10	7.00425	3.72633	49.0489	2.49666e-12	4.73308e-10	6.72502	3.4681	78.5605	7.76e-19	6.53e-18	6.72493	3.46666	78.555	7.78029e-19	1.13301e-17	NA	NA	NA	NA	NA	NA	NA	NA	NA	NA	NA	NA	NA	NA	NA	NA	NA	NA	NA	NA	NA	NA	NA	NA	NA	NA	NA
35	ZNF705G	10.3858	6.92857	140.302	2.29e-32	1.47e-29	10.3859	6.92697	140.46	2.11178e-32	2.2219e-29	6.71187	6.05161	531.984	1.05e-117	6.72e-116	6.71175	6.05014	531.946	1.06573e-117	1.18656e-115	NA	NA	NA	NA	NA	NA	NA	NA	5.83532	0	0	1	3.07149	0	0	1	4.45341	235524	300	3.5	1.38191	0.310305	2	0.0860291	1.43275	3.04824	0.00230186
36	PRAMEF7	13.0522	9.03564	77.0065	1.7e-18	3.65e-16	13.0523	9.03403	76.8958	1.80222e-18	6.32069e-16	6.68031	8.76244	2625.29	0	0	6.68018	8.76095	2614.09	0	0	NA	NA	NA	NA	NA	NA	NA	NA	NA	NA	NA	NA	NA	NA	NA	NA	NA	NA	NA	NA	NA	NA	NA	NA	NA	NA	NA
37	PRAMEF14	12.6217	8.64733	119.35	8.78e-28	4.52e-25	12.6218	8.64572	119.329	8.87011e-28	7.46615e-25	6.66977	8.94604	2453.26	0	0	6.66964	8.94456	2436.55	0	0	NA	NA	NA	NA	NA	NA	NA	NA	4.53912	1.77627	0.391324	2	4.42458	1.85054	0.418241	3	4.42458	265829	474	3.6	1.77764	0.401765	5	-0.0143976	0.439009	10.1114	4.91988e-24
38	NLRP4	5.39731	2.19693	13.6358	0.000221913	0.0029885	5.39739	2.19529	13.5839	0.00022813	0.005011	6.66822	3.95591	114.503	1.01e-26	1.22e-25	6.66811	3.95446	114.495	1.01509e-26	2.1212e-25	NA	NA	NA	NA	NA	NA	NA	NA	NA	NA	NA	NA	NA	NA	NA	NA	NA	NA	NA	NA	NA	NA	NA	NA	NA	NA	NA
39	ZIM3	8.41935	4.5469	66.2116	4.05e-16	6.68e-14	8.41939	4.54528	66.0778	4.33473e-16	1.16943e-13	6.66377	3.91883	111.265	5.18e-26	6.06e-25	6.66367	3.91738	111.257	5.19661e-26	1.05248e-24	NA	NA	NA	NA	NA	NA	NA	NA	NA	NA	NA	NA	NA	NA	NA	NA	NA	NA	NA	NA	NA	NA	NA	NA	NA	NA	NA
40	PRAMEF15	10.5605	6.57485	72.8366	1.41e-17	2.63e-15	10.5606	6.57324	72.7526	1.46964e-17	4.48197e-15	6.61501	7.7753	1147.33	1.71e-251	3.1e-249	6.61487	7.77382	1136.89	3.17244e-249	9.67503e-247	NA	NA	NA	NA	NA	NA	NA	NA	NA	NA	NA	NA	NA	NA	NA	NA	NA	NA	NA	NA	NA	NA	NA	NA	NA	NA	NA
41	PRAMEF5	9.54602	5.59479	50.7773	1.03e-12	1.22e-10	9.54606	5.59317	50.6244	1.11845e-12	2.15923e-10	6.58747	7.0003	925.768	2.46e-203	3.39e-201	6.58733	6.99882	920.028	4.34481e-202	1.01587e-199	NA	NA	NA	NA	NA	NA	NA	NA	NA	NA	NA	NA	NA	NA	NA	NA	NA	NA	NA	NA	NA	NA	NA	NA	NA	NA	NA
42	PRAMEF10	9.46395	5.51615	44.9204	2.05e-11	2.06e-09	9.46399	5.51453	44.7814	2.20308e-11	3.65034e-09	6.57882	6.13349	560.259	7.38e-124	5.1e-122	6.57869	6.13202	560.218	7.53566e-124	9.06131e-122	NA	NA	NA	NA	NA	NA	NA	NA	NA	NA	NA	NA	NA	NA	NA	NA	NA	NA	NA	NA	NA	NA	NA	NA	NA	NA	NA
43	SLC34A2	15.3379	11.3159	232.508	1.69e-52	5.44e-49	15.338	11.3143	232.898	1.39111e-52	7.31827e-49	6.57282	10.9643	3966.09	0	0	6.57269	10.9628	3927.69	0	0	NA	NA	NA	NA	8.52973	1.00699	0.118056	2	7.67675	1.86541	0.242995	15	8.26458	2.99173	0.361994	44	8.16905	1.35289e+06	690	3.74576	2.91773	0.357169	59	0.00283082	0.108071	75.5635	0
44	PRAMEF20	9.55129	5.60275	116.528	3.64e-27	1.67e-24	9.55133	5.60114	116.165	4.37439e-27	3.28751e-24	6.53274	6.13355	504.351	1.07e-111	6.5e-110	6.5326	6.13208	500.922	5.99036e-111	6.24035e-109	NA	NA	NA	NA	NA	NA	NA	NA	4.29765	0	0	1	NA	NA	NA	NA	4.29765	172090	475	3	0	0	1	0.0904254	1.99856	2.10513	0.0352804
45	PRAMEF11	10.401	6.42036	101.092	8.78e-24	3.05e-21	10.4011	6.41875	101.08	8.83458e-24	5.02449e-21	6.49179	7.46381	1356.88	4.93e-297	1.18e-294	6.49165	7.46233	1349.92	1.60489e-295	6.25401e-293	NA	NA	NA	NA	NA	NA	NA	NA	-7.66752	0	0	1	NA	NA	NA	NA	-7.66752	1.9045e+06	436	3	0	0	1	0.127609	1.98513	-3.92676	8.60985e-05
46	ZSCAN5D	11.8116	8.08537	160.613	8.31e-37	6.68e-34	11.8116	8.08377	160.877	7.27705e-37	9.57068e-34	6.46619	7.96408	1992.62	0	0	6.46605	7.9626	1992.47	0	0	NA	NA	NA	NA	NA	NA	NA	NA	6.97667	2.7594	0.395519	12	6.46648	2.98404	0.461463	18	6.62638	901704	497	3.6	2.98404	0.450327	30	-0.00404125	0.145255	45.6466	0
47	ART3	6.02372	3.34508	34.9175	3.44e-09	2.14e-07	6.02376	3.34345	34.7048	3.83688e-09	3.79059e-07	6.44643	3.15271	59.9506	9.73e-15	6.37e-14	6.44634	3.15127	59.9464	9.74745e-15	1.10574e-13	NA	NA	NA	NA	NA	NA	NA	NA	NA	NA	NA	NA	NA	NA	NA	NA	NA	NA	NA	NA	NA	NA	NA	NA	NA	NA	NA
48	KBTBD8	6.44104	5.30103	72.3529	1.8e-17	3.31e-15	6.44113	5.29941	72.0298	2.11976e-17	6.3723e-15	6.4063	5.4871	349.921	4.41e-78	1.77e-76	6.40618	5.48564	349.895	4.46592e-78	3.09133e-76	NA	NA	NA	NA	NA	NA	NA	NA	NA	NA	NA	NA	NA	NA	NA	NA	NA	NA	NA	NA	NA	NA	NA	NA	NA	NA	NA
49	PRAMEF4	9.03431	5.1149	86.261	1.58e-20	4.14e-18	9.03435	5.11329	85.9265	1.86745e-20	8.01975e-18	6.24419	5.68567	399.724	6.32e-89	2.86e-87	6.24407	5.68421	399.695	6.4171e-89	5.01989e-87	NA	NA	NA	NA	NA	NA	NA	NA	NA	NA	NA	NA	NA	NA	NA	NA	NA	NA	NA	NA	NA	NA	NA	NA	NA	NA	NA
50	CRHBP	6.53411	2.95819	25.1315	5.36e-07	1.75e-05	6.5342	2.95656	25.0063	5.71448e-07	3.05202e-05	6.20038	3.6056	84.8428	3.23e-20	2.96e-19	6.20027	3.60415	84.8368	3.24044e-20	5.13468e-19	NA	NA	NA	NA	NA	NA	NA	NA	NA	NA	NA	NA	NA	NA	NA	NA	NA	NA	NA	NA	NA	NA	NA	NA	NA	NA	NA
51	TRIM36	5.31612	5.17472	82.4658	1.08e-19	2.51e-17	5.31621	5.17311	82.0247	1.34398e-19	5.14205e-17	6.17079	5.16192	272.781	2.81e-61	8.63e-60	6.17067	5.16046	272.761	2.83952e-61	1.50889e-59	NA	NA	NA	NA	NA	NA	NA	NA	NA	NA	NA	NA	NA	NA	NA	NA	NA	NA	NA	NA	NA	NA	NA	NA	NA	NA	NA
52	ZNF679	6.46657	2.90827	27.7721	1.36e-07	5.4e-06	6.46659	2.90664	27.6299	1.46888e-07	9.42369e-06	6.09433	3.2879	65.3163	6.38e-16	4.47e-15	6.09423	3.28646	65.3116	6.39437e-16	7.7599e-15	NA	NA	NA	NA	NA	NA	NA	NA	NA	NA	NA	NA	NA	NA	NA	NA	NA	NA	NA	NA	NA	NA	NA	NA	NA	NA	NA
53	RP11-24B21.1	7.35392	5.49411	104.553	1.53e-24	5.62e-22	7.35401	5.49249	104.139	1.8862e-24	1.10254e-21	6.09098	5.83262	439.511	1.38e-97	7.03e-96	6.09085	5.83116	439.479	1.40553e-97	1.23751e-95	NA	NA	NA	NA	NA	NA	NA	NA	NA	NA	NA	NA	NA	NA	NA	NA	NA	NA	NA	NA	NA	NA	NA	NA	NA	NA	NA
54	ZSCAN5B	8.37056	4.94838	73.4308	1.04e-17	2e-15	8.37062	4.94676	73.2272	1.15555e-17	3.62928e-15	6.07891	5.07441	254.432	2.81e-57	8.1e-56	6.07879	5.07295	254.413	2.83357e-57	1.41632e-55	NA	NA	NA	NA	NA	NA	NA	NA	NA	NA	NA	NA	NA	NA	NA	NA	NA	NA	NA	NA	NA	NA	NA	NA	NA	NA	NA
55	FRG2	8.11588	4.33361	23.6633	1.15e-06	3.46e-05	8.11593	4.33198	23.6003	1.18566e-06	5.85678e-05	6.06078	4.96224	234.119	7.53e-53	1.98e-51	6.06066	4.96079	234.102	7.60035e-53	3.4543e-51	NA	NA	NA	NA	NA	NA	NA	NA	2.13457	0	0	1	1.07982	0	0	1	1.6072	46018.9	279	3.5	0.527377	0.328135	2	-1.75254e-05	1.44461	1.11256	0.265899
56	PTGER3	6.32582	4.16115	22.5721	2.02e-06	5.63e-05	6.32591	4.15953	22.5011	2.10019e-06	9.53191e-05	6.04301	3.33629	67.6628	1.94e-16	1.41e-15	6.04291	3.33485	67.658	1.94465e-16	2.44306e-15	NA	NA	NA	NA	NA	NA	NA	NA	NA	NA	NA	NA	NA	NA	NA	NA	NA	NA	NA	NA	NA	NA	NA	NA	NA	NA	NA
57	MBD3L5	11.2317	7.23613	30.0689	4.17e-08	1.91e-06	11.2317	7.23454	30.0004	4.3195e-08	3.22323e-06	6.00909	4.86516	217.308	3.5e-49	8.48e-48	6.00897	4.86371	217.292	3.5243e-49	1.48027e-47	NA	NA	NA	NA	NA	NA	NA	NA	NA	NA	NA	NA	NA	NA	NA	NA	NA	NA	NA	NA	NA	NA	NA	NA	NA	NA	NA
58	HSPA6	6.88246	3.42314	41.2853	1.32e-10	1.14e-08	6.8825	3.42151	40.9839	1.53492e-10	2.16774e-08	5.95351	4.34242	146.816	8.61e-34	1.32e-32	5.95339	4.34097	146.805	8.65711e-34	2.29435e-32	NA	NA	NA	NA	NA	NA	NA	NA	NA	NA	NA	NA	NA	NA	NA	NA	NA	NA	NA	NA	NA	NA	NA	NA	NA	NA	NA
59	MRAP2	6.35437	2.93319	19.1808	1.19e-05	0.000259634	6.35445	2.93155	19.0881	1.24822e-05	0.000442939	5.95135	3.16672	58.5101	2.02e-14	1.3e-13	5.95125	3.16529	58.5059	2.0268e-14	2.24828e-13	NA	NA	NA	NA	NA	NA	NA	NA	NA	NA	NA	NA	NA	NA	NA	NA	NA	NA	NA	NA	NA	NA	NA	NA	NA	NA	NA
60	PANX2	4.48602	4.82798	42.1905	8.28e-11	7.5e-09	4.48612	4.82636	42.0547	8.87553e-11	1.31527e-08	5.89014	4.68621	188.766	5.91e-43	1.22e-41	5.89002	4.68475	188.753	5.95162e-43	2.12271e-41	NA	NA	NA	NA	NA	NA	NA	NA	NA	NA	NA	NA	NA	NA	NA	NA	NA	NA	NA	NA	NA	NA	NA	NA	NA	NA	NA
61	CA2	9.80137	5.83827	40.8131	1.68e-10	1.43e-08	9.8014	5.83665	40.7134	1.76278e-10	2.44041e-08	5.87033	6.73169	816.562	1.35e-179	1.61e-177	5.8702	6.73021	816.502	1.39432e-179	2.87653e-177	NA	NA	NA	NA	NA	NA	NA	NA	NA	NA	NA	NA	NA	NA	NA	NA	NA	NA	NA	NA	NA	NA	NA	NA	NA	NA	NA
62	PKIB	6.0506	4.26193	40.5479	1.92e-10	1.6e-08	6.05068	4.26031	40.4297	2.03823e-10	2.78509e-08	5.83646	3.71104	89.6885	2.79e-21	2.7e-20	5.83635	3.70959	89.6819	2.797e-21	4.68536e-20	NA	NA	NA	NA	NA	NA	NA	NA	NA	NA	NA	NA	NA	NA	NA	NA	NA	NA	NA	NA	NA	NA	NA	NA	NA	NA	NA
63	RFPL4A	12.3206	8.94379	173.795	1.1e-39	1.18e-36	12.3207	8.94219	174.046	9.67412e-40	1.69644e-36	5.82318	9.36263	2949.74	0	0	5.82305	9.36115	2933.09	0	0	NA	NA	NA	NA	10.6991	0	0	1	NA	NA	NA	NA	NA	NA	NA	NA	NA	NA	NA	NA	NA	NA	NA	NA	NA	NA	NA
64	MBD3L3	13.2319	9.21493	200.141	1.95e-45	2.5e-42	13.2319	9.21333	200.562	1.5747e-45	3.31365e-42	5.78435	9.91053	3286.23	0	0	5.78421	9.90905	3261.89	0	0	NA	NA	NA	NA	NA	NA	NA	NA	7.85386	1.29003	0.164255	6	6.05568	3.1482	0.519876	25	6.73028	960245	208	3.80645	3.39395	0.50428	31	0.00672224	0.147219	45.6703	0
65	ITGA8	3.87647	2.21289	10.5136	0.001185	0.0112475	3.87652	2.21125	10.4758	0.00120949	0.0187555	5.75044	2.29356	26.894	2.15e-07	7.7e-07	5.75037	2.29213	26.8922	2.15129e-07	1.33499e-06	NA	NA	NA	NA	NA	NA	NA	NA	NA	NA	NA	NA	NA	NA	NA	NA	NA	NA	NA	NA	NA	NA	NA	NA	NA	NA	NA
66	RP11-1118M6.1	6.30177	2.89489	13.2684	0.000269917	0.00346793	6.30185	2.89325	13.2047	0.000279242	0.00585268	5.74458	3.00099	50.0778	1.48e-12	8.41e-12	5.74448	2.99955	50.0741	1.48045e-12	1.45711e-11	NA	NA	NA	NA	NA	NA	NA	NA	NA	NA	NA	NA	NA	NA	NA	NA	NA	NA	NA	NA	NA	NA	NA	NA	NA	NA	NA
67	SIAH1	6.15904	9.5694	139.764	3e-32	1.84e-29	6.15914	9.5678	140.128	2.4958e-32	2.50091e-29	5.71249	8.79377	3098.82	0	0	5.71236	8.79229	3102.38	0	0	3.00274	0	0	1	5.09767	0.819151	0.160691	2	5.77011	3.63555	0.630065	3	NA	NA	NA	NA	5.77011	768049	313	3	3.63555	0.630065	3	-0.00417882	0.724609	7.96884	1.6017e-15
68	TAF4B	5.34162	7.16331	41.3774	1.26e-10	1.09e-08	5.34173	7.1617	41.3001	1.30563e-10	1.85638e-08	5.70402	7.06649	1017.73	2.51e-223	3.97e-221	5.70389	7.06502	1017.65	2.61068e-223	7.04315e-221	NA	NA	NA	NA	NA	NA	NA	NA	NA	NA	NA	NA	NA	NA	NA	NA	NA	NA	NA	NA	NA	NA	NA	NA	NA	NA	NA
69	MBD3L2	13.3047	9.28759	138.922	4.58e-32	2.68e-29	13.3047	9.28599	138.931	4.55973e-32	4.36138e-29	5.68846	9.66905	2696.89	0	0	5.68832	9.66756	2673.21	0	0	NA	NA	NA	NA	NA	NA	NA	NA	NA	NA	NA	NA	NA	NA	NA	NA	NA	NA	NA	NA	NA	NA	NA	NA	NA	NA	NA
70	AC084121.16	6.64852	3.14923	13.3029	0.000264997	0.00341838	6.64858	3.14759	13.2557	0.000271754	0.00573572	5.68077	2.9711	48.5171	3.27e-12	1.8e-11	5.68067	2.96966	48.5136	3.28007e-12	3.12744e-11	NA	NA	NA	NA	NA	NA	NA	NA	NA	NA	NA	NA	NA	NA	NA	NA	NA	NA	NA	NA	NA	NA	NA	NA	NA	NA	NA
71	ENAM	5.3144	2.62473	18.813	1.44e-05	0.000304986	5.31453	2.62309	18.713	1.51942e-05	0.00052415	5.65821	3.41142	69.6338	7.14e-17	5.3e-16	5.6581	3.40998	69.6287	7.15887e-17	9.19198e-16	NA	NA	NA	NA	NA	NA	NA	NA	5.42266	0	0	1	NA	NA	NA	NA	5.42266	222206	1142	3	0	0	1	0.0561759	2.0353	2.63671	0.00837146
72	SGCG	2.51648	2.61557	8.65508	0.00326151	0.0243937	2.51667	2.61394	8.59251	0.00337549	0.0409162	5.63774	2.76163	40.3639	2.11e-10	1.01e-09	5.63765	2.76019	40.361	2.11111e-10	1.75589e-09	NA	NA	NA	NA	NA	NA	NA	NA	NA	NA	NA	NA	NA	NA	NA	NA	NA	NA	NA	NA	NA	NA	NA	NA	NA	NA	NA
73	SNAI1	8.00134	5.10706	44.4662	2.59e-11	2.54e-09	8.00141	5.10543	44.327	2.77856e-11	4.39618e-09	5.62906	4.85487	209.224	2.03e-47	4.71e-46	5.62893	4.85341	209.208	2.04481e-47	8.19598e-46	NA	NA	NA	NA	NA	NA	NA	NA	4.79768	1.90612	0.3973	2	NA	NA	NA	NA	4.79768	227956	264	3	1.90612	0.3973	2	-0.00932333	1.52644	3.14917	0.00163736
74	ZNF296	7.77831	5.96956	97.9154	4.37e-23	1.4e-20	7.7784	5.96795	97.8643	4.48054e-23	2.3571e-20	5.60061	5.48747	330.507	7.45e-74	2.75e-72	5.60048	5.48601	330.482	7.54728e-74	4.82728e-72	NA	NA	NA	NA	NA	NA	NA	NA	2.29347	0	0	1	NA	NA	NA	NA	2.29347	91446.9	475	3	0	0	1	-0.0122273	2.16378	1.06559	0.28661
75	TRIM51BP	11.5808	7.5768	104.215	1.82e-24	6.49e-22	11.5809	7.57519	104.181	1.84642e-24	1.10254e-21	5.59972	7.2448	1141.74	2.8e-250	4.94e-248	5.59959	7.24333	1141.65	2.92688e-250	9.05739e-248	NA	NA	NA	NA	NA	NA	NA	NA	NA	NA	NA	NA	NA	NA	NA	NA	NA	NA	NA	NA	NA	NA	NA	NA	NA	NA	NA
76	CLEC17A	5.65529	2.58567	18.8964	1.38e-05	0.00029338	5.65529	2.58404	18.7935	1.45666e-05	0.000504985	5.56843	2.61022	35.0568	3.2e-09	1.39e-08	5.56834	2.60878	35.0543	3.20641e-09	2.41232e-08	NA	NA	NA	NA	NA	NA	NA	NA	NA	NA	NA	NA	NA	NA	NA	NA	NA	NA	NA	NA	NA	NA	NA	NA	NA	NA	NA
77	FRG2B	8.70841	4.87794	25.5268	4.36e-07	1.46e-05	8.70845	4.87631	25.4618	4.51221e-07	2.45985e-05	5.54647	5.93258	452.093	2.53e-100	1.33e-98	5.54634	5.93111	452.059	2.57104e-100	2.3421e-98	NA	NA	NA	NA	NA	NA	NA	NA	NA	NA	NA	NA	NA	NA	NA	NA	NA	NA	NA	NA	NA	NA	NA	NA	NA	NA	NA
78	NT5C1B	6.60538	5.73361	107.571	3.34e-25	1.34e-22	6.60547	5.732	107.339	3.75232e-25	2.4675e-22	5.54166	5.83144	420.489	1.91e-93	9.4e-92	5.54153	5.82998	420.457	1.94056e-93	1.65325e-91	NA	NA	NA	NA	NA	NA	NA	NA	NA	NA	NA	NA	NA	NA	NA	NA	NA	NA	NA	NA	NA	NA	NA	NA	NA	NA	NA
79	CDS1	6.09997	3.16135	25.6426	4.11e-07	1.38e-05	6.1	3.15972	25.5254	4.36597e-07	2.39877e-05	5.50198	3.24244	59.8029	1.05e-14	6.85e-14	5.50187	3.241	59.7985	1.05085e-14	1.18887e-13	NA	NA	NA	NA	NA	NA	NA	NA	NA	NA	NA	NA	NA	NA	NA	NA	NA	NA	NA	NA	NA	NA	NA	NA	NA	NA	NA
80	TC2N	8.05974	4.4064	11.9372	0.000550241	0.00621304	8.05978	4.40477	11.9044	0.000560026	0.0103465	5.49409	3.59369	79.3099	5.31e-19	4.53e-18	5.49397	3.59225	79.3039	5.32534e-19	7.87499e-18	NA	NA	NA	NA	NA	NA	NA	NA	NA	NA	NA	NA	NA	NA	NA	NA	NA	NA	NA	NA	NA	NA	NA	NA	NA	NA	NA
81	PRAMEF21	NA	NA	NA	NA	NA	7.41444	3.64717	9.24539	0.00236089	0.0309341	5.48486	5.301	285.783	4.13e-64	1.32e-62	5.48473	5.29954	285.761	4.17103e-64	2.32198e-62	NA	NA	NA	NA	NA	NA	NA	NA	NA	NA	NA	NA	NA	NA	NA	NA	NA	NA	NA	NA	NA	NA	NA	NA	NA	NA	NA
82	HBA1	7.97009	4.6043	27.4758	1.59e-07	6.14e-06	7.97014	4.60267	27.4077	1.64777e-07	1.03197e-05	5.47038	5.41373	309.607	2.66e-69	9.21e-68	5.47025	5.41227	309.583	2.69186e-69	1.61381e-67	NA	NA	NA	NA	NA	NA	NA	NA	NA	NA	NA	NA	NA	NA	NA	NA	NA	NA	NA	NA	NA	NA	NA	NA	NA	NA	NA
83	DEFB103A	7.98498	4.22385	32.5189	1.18e-08	6.3e-07	7.98502	4.22223	32.4262	1.23808e-08	1.07657e-06	5.44995	5.22513	269.475	1.48e-60	4.46e-59	5.44982	5.22367	269.455	1.49188e-60	7.80937e-59	NA	NA	NA	NA	NA	NA	NA	NA	3.86038	0	0	1	4.7851	0.870779	0.181977	2	3.91432	343168	67	3.66667	0.897747	0.22935	3	0.0115426	0.711847	5.4826	4.19111e-08
84	PSPN	5.79761	4.07079	30.7735	2.9e-08	1.37e-06	5.79769	4.06917	30.6629	3.06971e-08	2.34921e-06	5.41739	3.84019	95.5015	1.48e-22	1.53e-21	5.41727	3.83875	95.4943	1.48321e-22	2.65175e-21	NA	NA	NA	NA	NA	NA	NA	NA	NA	NA	NA	NA	NA	NA	NA	NA	NA	NA	NA	NA	NA	NA	NA	NA	NA	NA	NA
85	PRR4	4.40146	4.51006	25.8601	3.67e-07	1.24e-05	4.40155	4.50843	25.7987	3.78936e-07	2.09841e-05	5.39937	5.40192	304.834	2.91e-68	9.95e-67	5.39924	5.40046	304.811	2.94894e-68	1.74311e-66	NA	NA	NA	NA	NA	NA	NA	NA	NA	NA	NA	NA	NA	NA	NA	NA	NA	NA	NA	NA	NA	NA	NA	NA	NA	NA	NA
86	ARC	5.29723	3.88751	20.3162	6.56e-06	0.000156631	5.29732	3.88588	20.2469	6.80649e-06	0.000263773	5.32679	5.88731	428.497	3.45e-95	1.71e-93	5.32666	5.88585	428.464	3.50888e-95	3.02612e-93	NA	NA	NA	NA	NA	NA	NA	NA	NA	NA	NA	NA	NA	NA	NA	NA	NA	NA	NA	NA	NA	NA	NA	NA	NA	NA	NA
87	PRRG4	5.14823	3.42806	35.8101	2.18e-09	1.41e-07	5.14832	3.42643	35.5344	2.5058e-09	2.61037e-07	5.30511	2.3267	26.184	3.1e-07	1.1e-06	5.30502	2.32527	26.1821	3.1069e-07	1.90146e-06	NA	NA	NA	NA	NA	NA	NA	NA	NA	NA	NA	NA	NA	NA	NA	NA	NA	NA	NA	NA	NA	NA	NA	NA	NA	NA	NA
88	CXADR	NA	NA	NA	NA	NA	6.47137	3.23182	8.68235	0.00321307	0.0395627	5.28028	4.54679	160.979	6.91e-37	1.19e-35	5.28015	4.54534	160.967	6.95758e-37	2.07377e-35	NA	NA	NA	NA	NA	NA	NA	NA	NA	NA	NA	NA	NA	NA	NA	NA	NA	NA	NA	NA	NA	NA	NA	NA	NA	NA	NA
89	GPBAR1	5.99709	2.87674	26.4934	2.64e-07	9.49e-06	5.99715	2.8751	26.337	2.86742e-07	1.64412e-05	5.27264	2.47481	29.961	4.41e-08	1.7e-07	5.27255	2.47338	29.9589	4.41308e-08	2.95183e-07	NA	NA	NA	NA	NA	NA	NA	NA	NA	NA	NA	NA	NA	NA	NA	NA	NA	NA	NA	NA	NA	NA	NA	NA	NA	NA	NA
90	SLC10A4	5.02955	2.32948	14.3504	0.000151746	0.00220023	5.02968	2.32785	14.2771	0.000157775	0.0037346	5.25782	2.50463	30.7393	2.95e-08	1.16e-07	5.25772	2.5032	30.737	2.95475e-08	2.01481e-07	NA	NA	NA	NA	NA	NA	NA	NA	NA	NA	NA	NA	NA	NA	NA	NA	NA	NA	NA	NA	NA	NA	NA	NA	NA	NA	NA
91	RRAD	-0.24626	6.61068	0.198789	0.655701	0.801994	-0.246156	6.60902	0.198457	0.655969	1	5.25776	6.67792	743.5	1.04e-163	1.11e-161	5.25762	6.67645	743.443	1.06951e-163	1.95702e-161	NA	NA	NA	NA	NA	NA	NA	NA	4.74672	1.47383	0.310495	5	7.98907	2.90286	0.363354	4	6.29271	1.9164e+06	308	3.44444	1.89266	0.300771	9	0.00468172	0.295574	21.274	1.97836e-100
92	CTD-2611O12.2	10.916	7.09448	67.2895	2.34e-16	3.97e-14	10.916	7.09288	67.1929	2.46195e-16	6.81668e-14	5.25457	6.88888	861.403	2.41e-189	3.12e-187	5.25444	6.88741	861.337	2.49432e-189	5.52505e-187	NA	NA	NA	NA	NA	NA	NA	NA	NA	NA	NA	NA	NA	NA	NA	NA	NA	NA	NA	NA	NA	NA	NA	NA	NA	NA	NA
93	TSPAN13	5.90863	3.55086	30.9404	2.66e-08	1.28e-06	5.90869	3.54923	30.7965	2.86561e-08	2.23337e-06	5.2432	3.36362	64.2334	1.11e-15	7.65e-15	5.24309	3.36218	64.2285	1.10793e-15	1.32693e-14	NA	NA	NA	NA	NA	NA	NA	NA	NA	NA	NA	NA	NA	NA	NA	NA	NA	NA	NA	NA	NA	NA	NA	NA	NA	NA	NA
94	F2RL1	4.07654	2.00824	8.7654	0.00306999	0.0232802	4.07662	2.0066	8.73371	0.0031238	0.0387127	5.18394	2.53186	31.2291	2.29e-08	9.16e-08	5.18384	2.53043	31.2268	2.2957e-08	1.587e-07	NA	NA	NA	NA	NA	NA	NA	NA	NA	NA	NA	NA	NA	NA	NA	NA	NA	NA	NA	NA	NA	NA	NA	NA	NA	NA	NA
95	ODC1	5.18283	10.4316	60.9157	5.96e-15	9.01e-13	5.18295	10.43	60.9245	5.93047e-15	1.46818e-12	5.17978	10.6463	5003.95	0	0	5.17965	10.6448	4989.03	0	0	NA	NA	NA	NA	NA	NA	NA	NA	NA	NA	NA	NA	NA	NA	NA	NA	NA	NA	NA	NA	NA	NA	NA	NA	NA	NA	NA
96	MYCT1	4.61078	1.86554	8.41384	0.00372375	0.0267848	4.61084	1.8639	8.38658	0.00378002	0.0443359	5.15742	1.9426	17.6594	2.64e-05	7.36e-05	5.15736	1.94117	17.6582	2.64376e-05	0.000127452	NA	NA	NA	NA	NA	NA	NA	NA	NA	NA	NA	NA	NA	NA	NA	NA	NA	NA	NA	NA	NA	NA	NA	NA	NA	NA	NA
97	ATP8A1	4.10597	2.57284	12.5841	0.000389034	0.00464134	4.10611	2.5712	12.4943	0.000408188	0.00794588	5.13389	3.68849	82.2065	1.23e-19	1.08e-18	5.13377	3.68705	82.2001	1.22981e-19	1.88346e-18	NA	NA	NA	NA	NA	NA	NA	NA	NA	NA	NA	NA	NA	NA	NA	NA	NA	NA	NA	NA	NA	NA	NA	NA	NA	NA	NA
98	HBEGF	5.45679	4.96527	53.5201	2.56e-13	3.26e-11	5.45689	4.96365	53.356	2.7826e-13	5.79745e-11	5.07853	6.15841	505.155	7.19e-112	4.37e-110	5.07839	6.15694	505.115	7.3294e-112	7.71163e-110	NA	NA	NA	NA	NA	NA	NA	NA	NA	NA	NA	NA	NA	NA	NA	NA	NA	NA	NA	NA	NA	NA	NA	NA	NA	NA	NA
99	FOSB	4.01151	2.47028	13.545	0.000232912	0.00309649	4.01165	2.46864	13.4709	0.000242289	0.00524535	5.03867	3.82282	90.2726	2.08e-21	2.02e-20	5.03855	3.82138	90.2656	2.08241e-21	3.51122e-20	NA	NA	NA	NA	NA	NA	NA	NA	NA	NA	NA	NA	NA	NA	NA	NA	NA	NA	NA	NA	NA	NA	NA	NA	NA	NA	NA
100	OSR2	3.99229	3.21778	15.6135	7.77e-05	0.00127135	3.99235	3.21614	15.5455	8.0543e-05	0.00215358	4.98954	3.45944	67.294	2.34e-16	1.69e-15	4.98942	3.458	67.2888	2.34506e-16	2.93383e-15	NA	NA	NA	NA	NA	NA	NA	NA	NA	NA	NA	NA	NA	NA	NA	NA	NA	NA	NA	NA	NA	NA	NA	NA	NA	NA	NA
101	VMO1	2.59676	1.94355	4.69535	0.0302443	0.117469	2.5968	1.94191	4.67255	0.0306483	0.193757	4.9784	3.06241	48.4724	3.35e-12	1.84e-11	4.97829	3.06097	48.4687	3.35603e-12	3.19696e-11	NA	NA	NA	NA	NA	NA	NA	NA	NA	NA	NA	NA	NA	NA	NA	NA	NA	NA	NA	NA	NA	NA	NA	NA	NA	NA	NA
102	ZNF214	5.03281	5.09026	75.234	4.18e-18	8.67e-16	5.03291	5.08864	74.8905	4.97548e-18	1.66189e-15	4.9585	4.76142	181.655	2.11e-41	4.14e-40	4.95838	4.75996	181.64	2.1245e-41	7.22229e-40	NA	NA	NA	NA	NA	NA	NA	NA	NA	NA	NA	NA	NA	NA	NA	NA	NA	NA	NA	NA	NA	NA	NA	NA	NA	NA	NA
103	ELOVL7	4.01742	3.71956	18.942	1.35e-05	0.000289322	4.01751	3.71793	18.8583	1.40797e-05	0.000492509	4.95362	3.09823	49.7837	1.72e-12	9.69e-12	4.95351	3.0968	49.7799	1.71999e-12	1.6803e-11	NA	NA	NA	NA	NA	NA	NA	NA	NA	NA	NA	NA	NA	NA	NA	NA	NA	NA	NA	NA	NA	NA	NA	NA	NA	NA	NA
104	NEFH	3.48901	4.51444	3.50425	0.0612117	0.186817	3.48913	4.51281	3.49158	0.0616818	0.305698	4.94239	3.30343	58.9335	1.63e-14	1.05e-13	4.94227	3.30199	58.929	1.63467e-14	1.82485e-13	NA	NA	NA	NA	NA	NA	NA	NA	NA	NA	NA	NA	NA	NA	NA	NA	NA	NA	NA	NA	NA	NA	NA	NA	NA	NA	NA
105	TPBG	2.24879	4.72828	13.4143	0.000249712	0.00328379	2.24889	4.72666	13.3677	0.000256002	0.00549532	4.92719	3.75886	84.6398	3.58e-20	3.27e-19	4.92707	3.75742	84.6332	3.59184e-20	5.68293e-19	NA	NA	NA	NA	NA	NA	NA	NA	NA	NA	NA	NA	NA	NA	NA	NA	NA	NA	NA	NA	NA	NA	NA	NA	NA	NA	NA
106	SCN3B	2.74568	1.8514	3.88042	0.0488523	0.161836	2.74594	1.84975	3.84331	0.0499447	0.268383	4.92133	2.04915	18.8414	1.42e-05	4.1e-05	4.92125	2.04773	18.8401	1.42149e-05	7.095e-05	NA	NA	NA	NA	NA	NA	NA	NA	NA	NA	NA	NA	NA	NA	NA	NA	NA	NA	NA	NA	NA	NA	NA	NA	NA	NA	NA
107	TRIM64C	4.08789	1.57906	5.1097	0.0237924	0.10026	4.08797	1.57742	5.07582	0.0242618	0.166409	4.89391	2.16331	21.0616	4.45e-06	1.38e-05	4.89382	2.16188	21.06	4.45121e-06	2.38338e-05	NA	NA	NA	NA	NA	NA	NA	NA	NA	NA	NA	NA	NA	NA	NA	NA	NA	NA	NA	NA	NA	NA	NA	NA	NA	NA	NA
108	KIAA0040	3.54848	2.37976	7.797	0.0052333	0.0342347	3.54862	2.37812	7.7274	0.0054389	0.0577059	4.89327	2.55475	30.6642	3.07e-08	1.21e-07	4.89317	2.55332	30.6619	3.07133e-08	2.0882e-07	NA	NA	NA	NA	NA	NA	NA	NA	NA	NA	NA	NA	NA	NA	NA	NA	NA	NA	NA	NA	NA	NA	NA	NA	NA	NA	NA
109	KIAA0040	3.54848	2.37976	7.797	0.0052333	0.0342347	2.19594	1.14849	1.15706	0.282076	0.779786	4.89327	2.55475	30.6642	3.07e-08	1.21e-07	1.37717	0.941071	0.717598	0.396933	0.744016	NA	NA	NA	NA	NA	NA	NA	NA	NA	NA	NA	NA	NA	NA	NA	NA	NA	NA	NA	NA	NA	NA	NA	NA	NA	NA	NA
110	CLDN1	1.23198	2.48192	2.45175	0.117394	0.285569	1.23202	2.48028	2.43711	0.118494	0.464853	4.8921	2.58507	31.5195	1.97e-08	7.92e-08	4.892	2.58364	31.5171	1.97691e-08	1.37249e-07	NA	NA	NA	NA	NA	NA	NA	NA	NA	NA	NA	NA	NA	NA	NA	NA	NA	NA	NA	NA	NA	NA	NA	NA	NA	NA	NA
111	PDGFRA	2.96124	6.51823	27.2475	1.79e-07	6.73e-06	2.96136	6.51661	27.2309	1.80554e-07	1.11747e-05	4.86795	6.0946	469.931	3.32e-104	1.81e-102	4.86782	6.09313	469.894	3.38011e-104	3.18958e-102	NA	NA	NA	NA	NA	NA	NA	NA	NA	NA	NA	NA	NA	NA	NA	NA	NA	NA	NA	NA	NA	NA	NA	NA	NA	NA	NA
112	INSM1	4.63748	1.94097	7.77337	0.00530221	0.0345919	4.63771	1.93933	7.70928	0.00549376	0.0581011	4.84621	1.93742	16.5638	4.7e-05	0.000126223	4.84613	1.93599	16.5626	4.70707e-05	0.000218559	NA	NA	NA	NA	NA	NA	NA	NA	NA	NA	NA	NA	NA	NA	NA	NA	NA	NA	NA	NA	NA	NA	NA	NA	NA	NA	NA
113	TRIM53AP	12.3398	8.32761	77.9033	1.08e-18	2.36e-16	12.3398	8.326	77.8058	1.13688e-18	4.0548e-16	4.8437	8.13111	1930.59	0	0	4.84356	8.12963	1930.43	0	0	NA	NA	NA	NA	NA	NA	NA	NA	NA	NA	NA	NA	NA	NA	NA	NA	NA	NA	NA	NA	NA	NA	NA	NA	NA	NA	NA
114	VAV3	3.12586	3.09404	13.617	0.000224149	0.00300917	3.12595	3.0924	13.5274	0.000235105	0.00512675	4.83791	3.62282	75.1042	4.47e-18	3.59e-17	4.83779	3.62138	75.0983	4.47848e-18	6.22873e-17	NA	NA	NA	NA	NA	NA	NA	NA	NA	NA	NA	NA	NA	NA	NA	NA	NA	NA	NA	NA	NA	NA	NA	NA	NA	NA	NA
115	BAMBI	2.7267	3.49545	17.6695	2.63e-05	0.000514461	2.72684	3.49382	17.5465	2.80369e-05	0.000888523	4.83515	4.23214	120.329	5.36e-28	6.85e-27	4.83503	4.23069	120.32	5.38436e-28	1.19141e-26	NA	NA	NA	NA	NA	NA	NA	NA	NA	NA	NA	NA	NA	NA	NA	NA	NA	NA	NA	NA	NA	NA	NA	NA	NA	NA	NA
116	RND1	3.75031	2.34706	11.8388	0.000580077	0.00645742	3.7504	2.34542	11.7957	0.000593671	0.0107788	4.78122	2.7126	34.7988	3.66e-09	1.58e-08	4.78111	2.71116	34.7961	3.66097e-09	2.73823e-08	NA	NA	NA	NA	NA	NA	NA	NA	NA	NA	NA	NA	NA	NA	NA	NA	NA	NA	NA	NA	NA	NA	NA	NA	NA	NA	NA
117	RTN4R	4.05159	2.02288	8.87854	0.00288543	0.0221947	4.05167	2.02124	8.84261	0.00294279	0.036934	4.76351	3.13383	49.9365	1.59e-12	8.99e-12	4.76339	3.13239	49.9325	1.59123e-12	1.55886e-11	NA	NA	NA	NA	NA	NA	NA	NA	NA	NA	NA	NA	NA	NA	NA	NA	NA	NA	NA	NA	NA	NA	NA	NA	NA	NA	NA
118	ZNF705A	10.1858	6.51551	63.6291	1.5e-15	2.36e-13	10.1859	6.51389	63.5382	1.57287e-15	4.03633e-13	4.75127	6.93938	837.29	4.21e-184	5.17e-182	4.75114	6.9379	837.223	4.35888e-184	9.26503e-182	NA	NA	NA	NA	NA	NA	NA	NA	NA	NA	NA	NA	NA	NA	NA	NA	NA	NA	NA	NA	NA	NA	NA	NA	NA	NA	NA
119	TRIM51	9.37992	5.43916	89.0474	3.85e-21	1.08e-18	9.37997	5.43754	88.7183	4.55228e-21	2.08247e-18	4.74725	5.72801	355.906	2.19e-79	8.97e-78	4.74712	5.72654	355.877	2.22475e-79	1.57628e-77	NA	NA	NA	NA	NA	NA	NA	NA	NA	NA	NA	NA	NA	NA	NA	NA	NA	NA	NA	NA	NA	NA	NA	NA	NA	NA	NA
120	PARD6B	3.30305	1.50994	3.51204	0.0609245	0.186471	3.30305	1.5083	3.48924	0.0617691	0.305765	4.74347	1.93895	16.2863	5.45e-05	0.000144808	4.74339	1.93752	16.2851	5.44903e-05	0.000250828	NA	NA	NA	NA	NA	NA	NA	NA	NA	NA	NA	NA	NA	NA	NA	NA	NA	NA	NA	NA	NA	NA	NA	NA	NA	NA	NA
121	SH3GL2	NA	NA	NA	NA	NA	4.58806	1.80934	5.38073	0.0203604	0.147181	4.73713	1.83644	14.5752	0.000134673	0.000336198	4.73706	1.83501	14.5742	0.000134746	0.000582232	NA	NA	NA	NA	NA	NA	NA	NA	NA	NA	NA	NA	NA	NA	NA	NA	NA	NA	NA	NA	NA	NA	NA	NA	NA	NA	NA
122	RNASE10	4.98105	3.43619	34.9617	3.36e-09	2.1e-07	4.98116	3.43456	34.6921	3.86203e-09	3.7976e-07	4.70807	3.04824	46.0793	1.14e-11	6.02e-11	4.70796	3.0468	46.0757	1.13771e-11	1.04363e-10	NA	NA	NA	NA	NA	NA	NA	NA	NA	NA	NA	NA	NA	NA	NA	NA	NA	NA	NA	NA	NA	NA	NA	NA	NA	NA	NA
123	PRAMEF3	NA	NA	NA	NA	NA	4.39339	1.69286	5.40669	0.0200597	0.14563	4.70682	2.24581	22.1908	2.47e-06	7.92e-06	4.70672	2.24438	22.1891	2.47075e-06	1.37146e-05	NA	NA	NA	NA	NA	NA	NA	NA	NA	NA	NA	NA	NA	NA	NA	NA	NA	NA	NA	NA	NA	NA	NA	NA	NA	NA	NA
124	ATF3	2.00941	4.78474	9.4684	0.00209042	0.0172008	2.00951	4.78311	9.44524	0.00211698	0.0285123	4.6951	5.61791	326.419	5.79e-73	2.11e-71	4.69497	5.61645	326.393	5.86695e-73	3.69636e-71	NA	NA	NA	NA	NA	NA	NA	NA	NA	NA	NA	NA	NA	NA	NA	NA	NA	NA	NA	NA	NA	NA	NA	NA	NA	NA	NA
125	ZNF217	4.6163	10.5549	93.7806	3.53e-22	1.05e-19	4.61638	10.5533	94.0217	3.12087e-22	1.52726e-19	4.6511	10.0388	4130.93	0	0	4.65097	10.0373	4127.6	0	0	9.52158	2.00099	0.210153	2	8.25185	3.70819	0.449377	9	6.244	3.33638	0.534334	54	6.54359	3.03499	0.46381	92	6.34586	588613	1048	3.63014	3.08916	0.486799	146	0.00219409	0.0645223	98.3175	0
126	DEFB103B	8.36913	4.5791	36.0587	1.91e-09	1.25e-07	8.36918	4.57748	35.9738	1.99985e-09	2.1254e-07	4.64618	4.52994	146.454	1.03e-33	1.57e-32	4.64605	4.5285	146.442	1.03922e-33	2.7404e-32	NA	NA	NA	NA	NA	NA	NA	NA	NA	NA	NA	NA	NA	NA	NA	NA	NA	NA	NA	NA	NA	NA	NA	NA	NA	NA	NA
127	OVOL1	NA	NA	NA	NA	NA	3.13604	1.31926	2.56761	0.109073	0.442068	4.63426	1.95895	16.3072	5.39e-05	0.000143502	4.63418	1.95752	16.306	5.38929e-05	0.000248373	NA	NA	NA	NA	NA	NA	NA	NA	NA	NA	NA	NA	NA	NA	NA	NA	NA	NA	NA	NA	NA	NA	NA	NA	NA	NA	NA
128	NXF1	5.05503	10.0326	114.264	1.14e-26	4.89e-24	5.05512	10.031	114.605	9.60602e-27	6.97033e-24	4.6301	9.94988	2760.08	0	0	4.62997	9.94839	2738.33	0	0	0.538337	0	0	1	1.32597	0.106001	0.0799424	3	3.02814	1.18873	0.392563	28	3.44645	3.1236	0.906323	54	3.16804	704317	619	3.65854	2.22968	0.703805	82	0.00017937	0.0902765	35.0906	9.37475e-270
129	TBX4	5.32777	2.74387	12.6988	0.000365895	0.00441029	5.32788	2.74223	12.6223	0.000381173	0.00748928	4.60975	2.59904	30.5613	3.23e-08	1.27e-07	4.60964	2.59761	30.5589	3.23876e-08	2.1992e-07	NA	NA	NA	NA	NA	NA	NA	NA	NA	NA	NA	NA	NA	NA	NA	NA	NA	NA	NA	NA	NA	NA	NA	NA	NA	NA	NA
130	RNF152	4.48766	3.29049	27.8688	1.3e-07	5.2e-06	4.48777	3.28886	27.6968	1.41899e-07	9.18048e-06	4.59841	3.71939	78.2059	9.28e-19	7.78e-18	4.59829	3.71795	78.1996	9.31378e-19	1.35072e-17	NA	NA	NA	NA	NA	NA	NA	NA	NA	NA	NA	NA	NA	NA	NA	NA	NA	NA	NA	NA	NA	NA	NA	NA	NA	NA	NA
131	ESRP1	5.15255	2.05479	8.19298	0.00420529	0.0293298	5.15274	2.05315	8.12316	0.00437032	0.0495233	4.58693	2.28709	22.6473	1.95e-06	6.31e-06	4.58683	2.28566	22.6455	1.94812e-06	1.0926e-05	NA	NA	NA	NA	NA	NA	NA	NA	NA	NA	NA	NA	NA	NA	NA	NA	NA	NA	NA	NA	NA	NA	NA	NA	NA	NA	NA
132	STK33	4.19867	2.64701	17.2409	3.29e-05	0.000620033	4.19875	2.64537	17.1594	3.4371e-05	0.00105741	4.5727	2.03111	17.4058	3.02e-05	8.34e-05	4.57261	2.02969	17.4045	3.02116e-05	0.000144462	NA	NA	NA	NA	NA	NA	NA	NA	NA	NA	NA	NA	NA	NA	NA	NA	NA	NA	NA	NA	NA	NA	NA	NA	NA	NA	NA
133	ALYREF	5.31578	9.53525	118.01	1.73e-27	8.53e-25	5.31589	9.53365	118.349	1.45412e-27	1.17689e-24	4.55396	9.89348	3574	0	0	4.55383	9.892	3563.76	0	0	0.784501	0.442133	0.563585	11	1.7063	0.702144	0.411502	15	1.88043	2.60962	1.38778	16	1.24079	0.42311	0.341002	12	1.61431	1.95511e+06	264	3.42857	2.36355	1.46412	28	-0.00541639	0.150854	10.737	6.82076e-27
134	BCAS1	4.71327	2.6553	17.6573	2.64e-05	0.000516825	4.7134	2.65366	17.5614	2.78172e-05	0.000882892	4.5527	2.34374	23.7922	1.07e-06	3.58e-06	4.5526	2.34231	23.7903	1.07422e-06	6.20498e-06	NA	NA	NA	NA	NA	NA	NA	NA	NA	NA	NA	NA	NA	NA	NA	NA	NA	NA	NA	NA	NA	NA	NA	NA	NA	NA	NA
135	PRAMEF18	4.35863	1.68317	6.47816	0.0109208	0.0572573	4.3587	1.68152	6.45669	0.0110535	0.0946267	4.54295	1.95203	15.9086	6.65e-05	0.000174488	4.54287	1.9506	15.9074	6.65164e-05	0.000302182	NA	NA	NA	NA	NA	NA	NA	NA	NA	NA	NA	NA	NA	NA	NA	NA	NA	NA	NA	NA	NA	NA	NA	NA	NA	NA	NA
136	CCK	NA	NA	NA	NA	NA	3.47702	1.84662	4.10732	0.042698	0.241791	4.53402	1.98861	16.5177	4.82e-05	0.000129181	4.53393	1.98718	16.5165	4.82287e-05	0.000223689	NA	NA	NA	NA	NA	NA	NA	NA	NA	NA	NA	NA	NA	NA	NA	NA	NA	NA	NA	NA	NA	NA	NA	NA	NA	NA	NA
137	SIPA1L2	0.291496	5.13809	0.288697	0.591057	0.758048	0.291609	5.13644	0.287687	0.591706	1	4.53387	4.95943	197.505	7.32e-45	1.59e-43	4.53374	4.95797	197.489	7.37544e-45	2.77641e-43	NA	NA	NA	NA	NA	NA	NA	NA	NA	NA	NA	NA	NA	NA	NA	NA	NA	NA	NA	NA	NA	NA	NA	NA	NA	NA	NA
138	HSPB3	2.40953	5.04908	26.2362	3.02e-07	1.05e-05	2.40962	5.04745	26.1361	3.18186e-07	1.80474e-05	4.53221	3.78932	81.7241	1.56e-19	1.38e-18	4.53209	3.78788	81.7175	1.57001e-19	2.39057e-18	NA	NA	NA	NA	NA	NA	NA	NA	NA	NA	NA	NA	NA	NA	NA	NA	NA	NA	NA	NA	NA	NA	NA	NA	NA	NA	NA
139	CCDC148	2.45489	2.18321	5.31315	0.021165	0.092429	2.45493	2.18157	5.26945	0.0217029	0.154022	4.52661	2.80448	36.2398	1.74e-09	7.74e-09	4.52649	2.80304	36.237	1.74725e-09	1.34139e-08	NA	NA	NA	NA	NA	NA	NA	NA	NA	NA	NA	NA	NA	NA	NA	NA	NA	NA	NA	NA	NA	NA	NA	NA	NA	NA	NA
140	CDKN1C	0.824933	4.57538	0.210822	0.646124	0.795881	0.825085	4.57372	0.210236	0.646582	1	4.52239	3.05816	45.0883	1.88e-11	9.82e-11	4.52228	3.05672	45.0847	1.88695e-11	1.7027e-10	NA	NA	NA	NA	NA	NA	NA	NA	NA	NA	NA	NA	NA	NA	NA	NA	NA	NA	NA	NA	NA	NA	NA	NA	NA	NA	NA
141	AKR1D1	NA	NA	NA	NA	NA	3.22362	1.34147	2.75329	0.0970545	0.410797	4.50856	1.76573	12.8593	0.000335805	0.000787509	4.50849	1.76431	12.8584	0.00033597	0.00136352	NA	NA	NA	NA	NA	NA	NA	NA	NA	NA	NA	NA	NA	NA	NA	NA	NA	NA	NA	NA	NA	NA	NA	NA	NA	NA	NA
142	FOS	1.33933	5.84769	0.722724	0.395252	0.601507	1.33949	5.84604	0.720694	0.395916	0.930257	4.50283	7.02126	815.964	1.82e-179	2.15e-177	4.50269	7.01978	811.256	1.92648e-178	3.89796e-176	NA	NA	NA	NA	NA	NA	NA	NA	NA	NA	NA	NA	NA	NA	NA	NA	NA	NA	NA	NA	NA	NA	NA	NA	NA	NA	NA
143	PDZD2	3.62362	2.81253	15.1447	9.96e-05	0.00157522	3.62375	2.8109	15.0524	0.000104565	0.00269653	4.44623	2.36294	23.7789	1.08e-06	3.6e-06	4.44612	2.36151	23.777	1.08166e-06	6.24455e-06	NA	NA	NA	NA	NA	NA	NA	NA	4.67033	0	0	1	NA	NA	NA	NA	4.67033	283475	2839	3	0	0	1	0.00946372	2.08971	2.23039	0.0257217
144	PTP4A1	4.59622	11.174	74.92	4.9e-18	1e-15	4.59633	11.1724	75.0448	4.60148e-18	1.56176e-15	4.42851	11.3093	7102.38	0	0	4.42838	11.3078	7147.13	0	0	5.57629	3.80032	0.681514	6	6.25285	3.73273	0.596964	14	8.38393	2.69718	0.321708	16	7.2141	3.25709	0.451489	37	7.35956	1.14212e+06	173	3.69811	2.68686	0.365084	53	-0.00334988	0.111235	66.1925	0
145	FGFR3	5.64925	3.44687	22.3214	2.31e-06	6.28e-05	5.64934	3.44524	22.2398	2.4063e-06	0.000106826	4.42435	4.20809	110.773	6.64e-26	7.73e-25	4.42422	4.20664	110.764	6.66614e-26	1.34364e-24	NA	NA	NA	NA	NA	NA	NA	NA	NA	NA	NA	NA	NA	NA	NA	NA	NA	NA	NA	NA	NA	NA	NA	NA	NA	NA	NA
146	RIPK4	NA	NA	NA	NA	NA	2.11108	1.73098	2.3102	0.128528	0.48908	4.42145	2.02229	16.7512	4.26e-05	0.00011516	4.42136	2.02087	16.7499	4.2644e-05	0.000199502	NA	NA	NA	NA	NA	NA	NA	NA	NA	NA	NA	NA	NA	NA	NA	NA	NA	NA	NA	NA	NA	NA	NA	NA	NA	NA	NA
147	USP17L2	4.88451	2.01909	7.45039	0.00634228	0.0393083	4.88471	2.01745	7.38427	0.00657969	0.0661106	4.41569	3.0879	45.3762	1.63e-11	8.51e-11	4.41557	3.08646	45.3725	1.62903e-11	1.4763e-10	NA	NA	NA	NA	NA	NA	NA	NA	NA	NA	NA	NA	NA	NA	NA	NA	NA	NA	NA	NA	NA	NA	NA	NA	NA	NA	NA
148	PNP	8.90893	10.5567	207.57	4.66e-47	8.55e-44	8.90903	10.5551	208.105	3.55908e-47	1.06991e-43	4.41335	11.0031	5923.95	0	0	4.41322	11.0016	5936.67	0	0	3.90779	1.41525	0.362161	34	4.10973	1.66514	0.405169	55	2.77931	0.87173	0.31365	193	3.04482	2.0202	0.663486	211	2.87309	1.14698e+06	289	3.52228	1.20229	0.418465	404	-0.00113208	0.0389695	73.7558	0
149	ALPPL2	7.03699	3.3454	20.7495	5.23e-06	0.000128477	7.03704	3.34376	20.6849	5.41416e-06	0.00021701	4.41297	3.47813	62.552	2.59e-15	1.76e-14	4.41284	3.47669	62.5469	2.60177e-15	3.05861e-14	NA	NA	NA	NA	NA	NA	NA	NA	NA	NA	NA	NA	NA	NA	NA	NA	NA	NA	NA	NA	NA	NA	NA	NA	NA	NA	NA
150	TPPP	4.31299	1.81994	6.84148	0.00890649	0.0495872	4.31323	1.8183	6.78954	0.00916934	0.0826695	4.40644	2.00454	16.3877	5.16e-05	0.000137894	4.40634	2.00311	16.3865	5.1652e-05	0.00023883	NA	NA	NA	NA	NA	NA	NA	NA	NA	NA	NA	NA	NA	NA	NA	NA	NA	NA	NA	NA	NA	NA	NA	NA	NA	NA	NA
151	ARID3B	3.45736	4.65648	37.1877	1.07e-09	7.38e-08	3.45746	4.65486	37.0841	1.1314e-09	1.26639e-07	4.4042	4.98713	197.14	8.79e-45	1.9e-43	4.40407	4.98567	197.124	8.86079e-45	3.31775e-43	NA	NA	NA	NA	NA	NA	NA	NA	NA	NA	NA	NA	NA	NA	NA	NA	NA	NA	NA	NA	NA	NA	NA	NA	NA	NA	NA
152	TRIM49	12.2159	8.20508	116.799	3.18e-27	1.51e-24	12.2159	8.20348	116.795	3.1838e-27	2.48136e-24	4.39362	7.87485	1509.31	0	0	4.39348	7.87338	1509.18	0	0	NA	NA	NA	NA	NA	NA	NA	NA	6.03901	1.47473	0.2442	3	6.1716	1.94789	0.315621	16	6.03901	1.16816e+06	452	3.84211	2.06531	0.341995	19	-0.000629312	0.190003	31.7871	9.76768e-222
153	NRARP	4.36982	1.90775	6.98514	0.00821893	0.046813	4.37008	1.90611	6.92363	0.00850641	0.0784402	4.39057	2.17049	19.435	1.04e-05	3.06e-05	4.39047	2.16907	19.4335	1.04163e-05	5.30343e-05	NA	NA	NA	NA	NA	NA	NA	NA	NA	NA	NA	NA	NA	NA	NA	NA	NA	NA	NA	NA	NA	NA	NA	NA	NA	NA	NA
154	TPD52	3.37951	4.04681	10.5317	0.00117345	0.0111874	3.3796	4.04517	10.486	0.00120286	0.0187078	4.38565	2.88366	37.8798	7.52e-10	3.45e-09	4.38553	2.88222	37.8767	7.53592e-10	5.97282e-09	NA	NA	NA	NA	NA	NA	NA	NA	NA	NA	NA	NA	NA	NA	NA	NA	NA	NA	NA	NA	NA	NA	NA	NA	NA	NA	NA
155	TRIM48	10.5575	6.57092	46.9812	7.17e-12	7.62e-10	10.5575	6.5693	46.8946	7.49099e-12	1.30275e-09	4.3802	6.71796	675.492	6.39e-149	6.21e-147	4.38007	6.71649	675.435	6.5713e-149	1.10624e-146	NA	NA	NA	NA	NA	NA	NA	NA	4.90109	0	0	1	7.85596	0	0	1	6.37853	819607	208	3.5	1.47744	0.231627	2	0.115265	1.37997	4.53869	5.66059e-06
156	TRIM53BP	11.144	7.14747	154.863	1.5e-35	1.13e-32	11.144	7.14587	155.116	1.32102e-35	1.63518e-32	4.37171	6.1069	438.584	2.2e-97	1.11e-95	4.37157	6.10544	438.547	2.24231e-97	1.96604e-95	NA	NA	NA	NA	NA	NA	NA	NA	NA	NA	NA	NA	NA	NA	NA	NA	NA	NA	NA	NA	NA	NA	NA	NA	NA	NA	NA
157	HSPA1B	4.03506	8.78054	65.3548	6.26e-16	1.02e-13	4.03515	8.77893	65.4605	5.92917e-16	1.57934e-13	4.36853	9.4267	1956.37	0	0	4.3684	9.42522	1938.57	0	0	NA	NA	NA	NA	NA	NA	NA	NA	NA	NA	NA	NA	NA	NA	NA	NA	NA	NA	NA	NA	NA	NA	NA	NA	NA	NA	NA
158	FRG2C	9.03569	5.10976	30.1518	4e-08	1.84e-06	9.03573	5.10814	30.0613	4.18592e-08	3.13468e-06	4.36225	5.78629	348.497	9e-78	3.59e-76	4.36211	5.78482	348.468	9.13734e-78	6.28356e-76	NA	NA	NA	NA	NA	NA	NA	NA	NA	NA	NA	NA	NA	NA	NA	NA	NA	NA	NA	NA	NA	NA	NA	NA	NA	NA	NA
159	KIF5C	2.8532	3.4835	19.0221	1.29e-05	0.000279298	2.85333	3.48187	18.8569	1.40897e-05	0.000492509	4.35264	3.33028	54.8643	1.29e-13	7.83e-13	4.35251	3.32884	54.8598	1.29445e-13	1.3572e-12	NA	NA	NA	NA	NA	NA	NA	NA	NA	NA	NA	NA	NA	NA	NA	NA	NA	NA	NA	NA	NA	NA	NA	NA	NA	NA	NA
160	RASD1	0.449551	4.87679	0.0703044	0.790894	0.884879	0.449712	4.87513	0.0701053	0.791184	1	4.32523	5.03232	200.878	1.34e-45	3.01e-44	4.3251	5.03086	200.861	1.35506e-45	5.25129e-44	NA	NA	NA	NA	NA	NA	NA	NA	NA	NA	NA	NA	NA	NA	NA	NA	NA	NA	NA	NA	NA	NA	NA	NA	NA	NA	NA
161	ZNF705C	4.97224	2.02442	7.59929	0.00583912	0.0370483	4.97243	2.02278	7.53252	0.0060595	0.0625663	4.32288	1.82907	13.2695	0.000269757	0.000640409	4.32279	1.82765	13.2685	0.0002699	0.00110906	NA	NA	NA	NA	NA	NA	NA	NA	NA	NA	NA	NA	NA	NA	NA	NA	NA	NA	NA	NA	NA	NA	NA	NA	NA	NA	NA
162	HSPA1A	3.63345	8.90913	40.7126	1.76e-10	1.48e-08	3.63352	8.90753	40.7245	1.75278e-10	2.44041e-08	4.31759	9.54296	2279.49	0	0	4.31746	9.54148	2262.16	0	0	-0.179355	0.600991	-3.35084	52	0.473043	0.464814	0.982604	56	1.28642	0.523939	0.407285	103	1.28518	0.87356	0.679719	135	1.2858	2.0554e+06	641	3.56723	0.59467	0.462492	238	-0.00113189	0.0500744	25.7004	1.15813e-145
163	HEY2	3.97396	1.62469	5.12073	0.0236417	0.0997423	3.97394	1.62305	5.08192	0.0241766	0.166018	4.31387	1.54567	9.61636	0.00192852	0.00394897	4.31381	1.54424	9.61571	0.0019292	0.00683898	NA	NA	NA	NA	NA	NA	NA	NA	NA	NA	NA	NA	NA	NA	NA	NA	NA	NA	NA	NA	NA	NA	NA	NA	NA	NA	NA
164	KLHL15	4.12345	6.08815	65.003	7.48e-16	1.2e-13	4.12355	6.08653	65.0412	7.33486e-16	1.92934e-13	4.30299	6.00897	403.871	7.91e-90	3.66e-88	4.30285	6.0075	403.837	8.04844e-90	6.46425e-88	NA	NA	NA	NA	NA	NA	NA	NA	NA	NA	NA	NA	NA	NA	NA	NA	NA	NA	NA	NA	NA	NA	NA	NA	NA	NA	NA
165	KITLG	2.22278	6.58145	4.19368	0.040575	0.143243	2.22293	6.57982	4.18404	0.0408062	0.234742	4.3022	6.63476	627.985	1.37e-138	1.2e-136	4.30206	6.63329	627.931	1.4084e-138	2.14761e-136	NA	NA	NA	NA	NA	NA	NA	NA	NA	NA	NA	NA	NA	NA	NA	NA	NA	NA	NA	NA	NA	NA	NA	NA	NA	NA	NA
166	CTD-2215E18.1	4.76365	2.00544	10.0722	0.00150525	0.0135378	4.76373	2.0038	10.0376	0.00153377	0.0225543	4.29456	1.56575	9.73408	0.00180883	0.00372107	4.2945	1.56433	9.7334	0.00180949	0.00644392	NA	NA	NA	NA	NA	NA	NA	NA	NA	NA	NA	NA	NA	NA	NA	NA	NA	NA	NA	NA	NA	NA	NA	NA	NA	NA	NA
167	TRIM60	NA	NA	NA	NA	NA	2.98533	1.28422	2.27966	0.13108	0.495211	4.29432	1.53932	9.48745	0.00206882	0.00421357	4.29426	1.5379	9.4868	0.00206955	0.00729719	NA	NA	NA	NA	NA	NA	NA	NA	NA	NA	NA	NA	NA	NA	NA	NA	NA	NA	NA	NA	NA	NA	NA	NA	NA	NA	NA
168	LRRC8B	3.51299	5.68567	32.7086	1.07e-08	5.81e-07	3.51307	5.68405	32.5056	1.18852e-08	1.04209e-06	4.29337	5.04257	201.121	1.19e-45	2.67e-44	4.29324	5.04112	201.104	1.19899e-45	4.65504e-44	NA	NA	NA	NA	NA	NA	NA	NA	NA	NA	NA	NA	NA	NA	NA	NA	NA	NA	NA	NA	NA	NA	NA	NA	NA	NA	NA
169	PKP2	NA	NA	NA	NA	NA	2.4231	1.30871	1.65434	0.19837	0.637589	4.29111	2.06815	17.1283	3.49e-05	9.53e-05	4.29101	2.06673	17.1269	3.4963e-05	0.000165146	NA	NA	NA	NA	NA	NA	NA	NA	NA	NA	NA	NA	NA	NA	NA	NA	NA	NA	NA	NA	NA	NA	NA	NA	NA	NA	NA
170	LEKR1	NA	NA	NA	NA	NA	2.05834	1.29821	1.24089	0.265299	0.751675	4.28226	1.72099	11.6071	0.000656996	0.00146906	4.28219	1.71956	11.6063	0.000657298	0.00254256	NA	NA	NA	NA	NA	NA	NA	NA	NA	NA	NA	NA	NA	NA	NA	NA	NA	NA	NA	NA	NA	NA	NA	NA	NA	NA	NA
171	LEKR1	NA	NA	NA	NA	NA	0.117534	1.17353	0.00383568	0.950616	1	4.28226	1.72099	11.6071	0.000656996	0.00146906	0.390307	1.16212	0.0818498	0.774806	1	NA	NA	NA	NA	NA	NA	NA	NA	NA	NA	NA	NA	NA	NA	NA	NA	NA	NA	NA	NA	NA	NA	NA	NA	NA	NA	NA
172	BHLHE22	5.08243	2.02165	10.32	0.00131596	0.0121847	5.08236	2.02001	10.2595	0.0013598	0.020468	4.28064	1.53255	9.38581	0.00218671	0.00443136	4.28058	1.53112	9.38517	0.00218747	0.00767056	NA	NA	NA	NA	NA	NA	NA	NA	NA	NA	NA	NA	NA	NA	NA	NA	NA	NA	NA	NA	NA	NA	NA	NA	NA	NA	NA
173	IFRD1	3.52863	7.85899	64.3993	1.02e-15	1.61e-13	3.52871	7.85738	64.5603	9.3623e-16	2.43223e-13	4.27513	8.05	1664.35	0	0	4.27499	8.04853	1664.21	0	0	NA	NA	NA	NA	9.34836	0	0	1	4.66927	2.34997	0.503285	3	3.20592	0.945462	0.294911	3	3.93759	214912	451	3.5	1.78403	0.453076	6	-0.00698362	0.408209	9.66314	4.32408e-22
174	PRKAR2B	3.98473	2.81144	17.5813	2.75e-05	0.00053318	3.98485	2.8098	17.4801	2.9033e-05	0.00091571	4.24304	2.7411	32.4983	1.19e-08	4.9e-08	4.24292	2.73967	32.4957	1.19459e-08	8.50109e-08	NA	NA	NA	NA	NA	NA	NA	NA	NA	NA	NA	NA	NA	NA	NA	NA	NA	NA	NA	NA	NA	NA	NA	NA	NA	NA	NA
175	NEFM	5.16786	4.5552	10.4344	0.00123686	0.0116112	5.16794	4.55356	10.4065	0.00125572	0.0193018	4.23483	2.90006	37.3251	1e-09	4.52e-09	4.23471	2.89863	37.3221	1.00145e-09	7.83405e-09	NA	NA	NA	NA	NA	NA	NA	NA	NA	NA	NA	NA	NA	NA	NA	NA	NA	NA	NA	NA	NA	NA	NA	NA	NA	NA	NA
176	GAPT	NA	NA	NA	NA	NA	3.15309	1.30366	2.58907	0.107603	0.437884	4.19693	2.4513	24.6443	6.89e-07	2.35e-06	4.19682	2.44987	24.6423	6.90198e-07	4.07515e-06	NA	NA	NA	NA	NA	NA	NA	NA	NA	NA	NA	NA	NA	NA	NA	NA	NA	NA	NA	NA	NA	NA	NA	NA	NA	NA	NA
177	PELI1	4.53454	6.28409	86.3965	1.47e-20	3.95e-18	4.53465	6.28248	86.5374	1.37121e-20	6.01133e-18	4.19639	6.60589	602.894	3.93e-133	3.18e-131	4.19625	6.60442	602.842	4.03274e-133	5.6574e-131	NA	NA	NA	NA	NA	NA	NA	NA	NA	NA	NA	NA	NA	NA	NA	NA	NA	NA	NA	NA	NA	NA	NA	NA	NA	NA	NA
178	TRIM49C	11.7381	7.73199	97.2886	5.99e-23	1.88e-20	11.7381	7.73038	97.2329	6.16351e-23	3.08807e-20	4.16974	7.25904	945.586	1.21e-207	1.75e-205	4.1696	7.25756	945.505	1.25852e-207	3.15273e-205	NA	NA	NA	NA	NA	NA	NA	NA	NA	NA	NA	NA	NA	NA	NA	NA	NA	NA	NA	NA	NA	NA	NA	NA	NA	NA	NA
179	CD24P4	3.09582	2.0459	6.58	0.0103131	0.0548538	3.09597	2.04426	6.54687	0.0105069	0.091234	4.16786	1.48925	8.6418	0.00328537	0.0064099	4.1678	1.48782	8.64121	0.00328643	0.011097	NA	NA	NA	NA	NA	NA	NA	NA	NA	NA	NA	NA	NA	NA	NA	NA	NA	NA	NA	NA	NA	NA	NA	NA	NA	NA	NA
180	HFE2	2.22687	1.6225	2.31304	0.128293	0.302534	2.22692	1.62086	2.29197	0.130045	0.492798	4.16212	1.60964	9.86883	0.00168102	0.00348505	4.16205	1.60822	9.86811	0.00168168	0.00603266	NA	NA	NA	NA	NA	NA	NA	NA	NA	NA	NA	NA	NA	NA	NA	NA	NA	NA	NA	NA	NA	NA	NA	NA	NA	NA	NA
181	PELI2	4.67456	5.29936	75.5652	3.54e-18	7.45e-16	4.67465	5.29774	75.1237	4.42131e-18	1.52521e-15	4.14877	4.80393	164.064	1.47e-37	2.55e-36	4.14864	4.80247	164.05	1.47548e-37	4.44821e-36	NA	NA	NA	NA	NA	NA	NA	NA	NA	NA	NA	NA	NA	NA	NA	NA	NA	NA	NA	NA	NA	NA	NA	NA	NA	NA	NA
182	PIM1	2.36915	5.55742	16.9406	3.86e-05	0.000703573	2.36925	5.55579	16.8854	3.97052e-05	0.00118513	4.14856	6.06591	408.002	9.98e-91	4.7e-89	4.14843	6.06445	407.967	1.01557e-90	8.28318e-89	NA	NA	NA	NA	NA	NA	NA	NA	NA	NA	NA	NA	NA	NA	NA	NA	NA	NA	NA	NA	NA	NA	NA	NA	NA	NA	NA
183	TRIM49B	11.106	7.10905	87.6792	7.7e-21	2.11e-18	11.106	7.10744	87.6112	7.9672e-21	3.5671e-18	4.14821	7.1449	869.885	3.46e-191	4.52e-189	4.14808	7.14343	869.81	3.58831e-191	8.11923e-189	NA	NA	NA	NA	NA	NA	NA	NA	NA	NA	NA	NA	NA	NA	NA	NA	NA	NA	NA	NA	NA	NA	NA	NA	NA	NA	NA
184	LIPF	3.81302	1.63656	4.92851	0.0264171	0.107363	3.8132	1.63491	4.89001	0.0270125	0.178422	4.13934	1.56474	9.2926	0.00230082	0.00464251	4.13927	1.56331	9.29193	0.00230166	0.00803747	NA	NA	NA	NA	NA	NA	NA	NA	NA	NA	NA	NA	NA	NA	NA	NA	NA	NA	NA	NA	NA	NA	NA	NA	NA	NA	NA
185	PPP1R14C	5.1243	2.08332	7.86686	0.00503491	0.0332754	5.12448	2.08168	7.79957	0.00522585	0.0559917	4.1361	1.5987	9.67227	0.0018707	0.00384029	4.13603	1.59728	9.67157	0.00187142	0.00664982	NA	NA	NA	NA	NA	NA	NA	NA	NA	NA	NA	NA	NA	NA	NA	NA	NA	NA	NA	NA	NA	NA	NA	NA	NA	NA	NA
186	ZNF551	4.37872	6.56948	89.4597	3.13e-21	8.94e-19	4.37882	6.56787	89.6304	2.87081e-21	1.34245e-18	4.13454	6.74005	654.097	2.87e-144	2.73e-142	4.13441	6.73858	654.04	2.95432e-144	4.85685e-142	NA	NA	NA	NA	NA	NA	NA	NA	NA	NA	NA	NA	NA	NA	NA	NA	NA	NA	NA	NA	NA	NA	NA	NA	NA	NA	NA
187	PDZK1	2.54141	2.408	7.15868	0.00746021	0.0441124	2.54142	2.40636	7.11371	0.00764966	0.0735703	4.13159	2.61209	28.2499	1.07e-07	3.95e-07	4.13147	2.61066	28.2476	1.06748e-07	6.84638e-07	NA	NA	NA	NA	NA	NA	NA	NA	NA	NA	NA	NA	NA	NA	NA	NA	NA	NA	NA	NA	NA	NA	NA	NA	NA	NA	NA
188	TFCP2L1	0.37553	1.68336	0.0869886	0.768041	0.87121	0.375596	1.68172	0.085856	0.769513	1	4.1235	2.00342	15.4073	8.67e-05	0.000223719	4.1234	2.00199	15.4061	8.67094e-05	0.000387476	NA	NA	NA	NA	NA	NA	NA	NA	NA	NA	NA	NA	NA	NA	NA	NA	NA	NA	NA	NA	NA	NA	NA	NA	NA	NA	NA
189	CTAGE8	NA	NA	NA	NA	NA	3.58303	1.75111	3.72204	0.0536989	0.280986	4.09293	1.61357	9.7353	0.00180762	0.00372022	4.09286	1.61214	9.73459	0.00180833	0.00644087	NA	NA	NA	NA	NA	NA	NA	NA	NA	NA	NA	NA	NA	NA	NA	NA	NA	NA	NA	NA	NA	NA	NA	NA	NA	NA	NA
190	TRPC5OS	4.27069	1.68128	6.27689	0.0122323	0.0623541	4.27071	1.67964	6.25539	0.0123816	0.102983	4.08903	1.54458	8.94083	0.00278866	0.00552032	4.08896	1.54315	8.94019	0.00278964	0.00955754	NA	NA	NA	NA	NA	NA	NA	NA	NA	NA	NA	NA	NA	NA	NA	NA	NA	NA	NA	NA	NA	NA	NA	NA	NA	NA	NA
191	SOX4	2.82731	5.11977	34.4523	4.37e-09	2.6e-07	2.82739	5.11814	34.244	4.86184e-09	4.6829e-07	4.07265	4.27785	109.005	1.62e-25	1.86e-24	4.07252	4.27641	108.996	1.62634e-25	3.23164e-24	NA	NA	NA	NA	NA	NA	NA	NA	NA	NA	NA	NA	NA	NA	NA	NA	NA	NA	NA	NA	NA	NA	NA	NA	NA	NA	NA
192	UTS2D	2.58837	2.04512	4.8621	0.0274529	0.110163	2.58834	2.04348	4.82647	0.028026	0.182798	4.06429	2.65633	28.9878	7.28e-08	2.75e-07	4.06417	2.6549	28.9854	7.29267e-08	4.77176e-07	NA	NA	NA	NA	NA	NA	NA	NA	NA	NA	NA	NA	NA	NA	NA	NA	NA	NA	NA	NA	NA	NA	NA	NA	NA	NA	NA
193	DBR1	4.40689	7.38685	83.1554	7.59e-20	1.84e-17	4.40698	7.38524	83.3054	7.03076e-20	2.79148e-17	4.06193	7.14747	855.655	4.29e-188	5.37e-186	4.06179	7.14599	855.581	4.44928e-188	9.65218e-186	NA	NA	NA	NA	NA	NA	NA	NA	1.7535	0.570327	0.325251	3	1.85029	1.43535	0.775741	5	1.8019	517717	544	3.625	1.07823	0.598388	8	0.00298414	0.310124	5.80063	6.60667e-09
194	KRT6A	NA	NA	NA	NA	NA	3.06697	1.3032	2.43289	0.118814	0.465499	4.04537	1.88008	13.1918	0.000281177	0.000665571	4.04528	1.87865	13.1908	0.000281333	0.00115289	-11.3315	2.02712	-0.178893	3	-7.93845	4.47943	-0.564271	3	-6.24608	1.10991	-0.177697	6	NA	NA	NA	NA	-6.24608	531220	564	3	1.10991	-0.177697	6	0.0243935	0.408017	-15.3682	2.676e-53
195	TFIP11	3.76504	8.1878	51.8987	5.84e-13	7.09e-11	3.76513	8.18619	51.9547	5.67948e-13	1.12748e-10	4.04428	8.56244	2148.71	0	0	4.04415	8.56096	2150.17	0	0	NA	NA	NA	NA	NA	NA	NA	NA	3.51544	1.90133	0.540852	9	3.23328	2.44182	0.755213	8	3.30305	132187	837	3.47059	1.99983	0.605448	17	0.00363623	0.200227	16.4784	5.24642e-61
196	CDH6	3.93995	1.81292	6.71231	0.00957494	0.0520911	3.94004	1.81128	6.68604	0.00971708	0.0861576	4.03444	2.26307	19.7886	8.65e-06	2.57e-05	4.03433	2.26164	19.787	8.65712e-06	4.45081e-05	NA	NA	NA	NA	NA	NA	NA	NA	NA	NA	NA	NA	NA	NA	NA	NA	NA	NA	NA	NA	NA	NA	NA	NA	NA	NA	NA
197	EGR3	NA	NA	NA	NA	NA	1.91628	1.22725	0.973394	0.323835	0.839072	4.03147	2.18528	18.2748	1.91e-05	5.42e-05	4.03137	2.18385	18.2733	1.91369e-05	9.38691e-05	NA	NA	NA	NA	NA	NA	NA	NA	NA	NA	NA	NA	NA	NA	NA	NA	NA	NA	NA	NA	NA	NA	NA	NA	NA	NA	NA
198	CGN	2.88212	1.59393	3.25935	0.0710172	0.206715	2.88223	1.59229	3.23309	0.0721642	0.340177	4.03074	1.77324	11.6138	0.000654652	0.00146462	4.03065	1.77181	11.6129	0.00065497	0.00253542	NA	NA	NA	NA	NA	NA	NA	NA	NA	NA	NA	NA	NA	NA	NA	NA	NA	NA	NA	NA	NA	NA	NA	NA	NA	NA	NA
199	HBA2	7.1153	3.82122	17.4655	2.93e-05	0.000560765	7.11536	3.81959	17.4109	3.01093e-05	0.00094144	4.02724	3.9266	82.5047	1.05e-19	9.37e-19	4.02712	3.92516	82.4976	1.05799e-19	1.62863e-18	NA	NA	NA	NA	NA	NA	NA	NA	NA	NA	NA	NA	NA	NA	NA	NA	NA	NA	NA	NA	NA	NA	NA	NA	NA	NA	NA
200	IMPG2	3.04094	2.41971	9.76886	0.00177492	0.0153069	3.04109	2.41807	9.71415	0.00182855	0.025635	4.02715	2.49414	24.7281	6.6e-07	2.26e-06	4.02704	2.49271	24.726	6.60849e-07	3.91064e-06	NA	NA	NA	NA	NA	NA	NA	NA	NA	NA	NA	NA	NA	NA	NA	NA	NA	NA	NA	NA	NA	NA	NA	NA	NA	NA	NA
201	FAM81B	NA	NA	NA	NA	NA	3.07782	1.30665	2.45652	0.117038	0.461549	4.01528	1.43381	7.72352	0.00545061	0.0102367	4.01522	1.43239	7.72299	0.0054522	0.0177218	NA	NA	NA	NA	NA	NA	NA	NA	NA	NA	NA	NA	NA	NA	NA	NA	NA	NA	NA	NA	NA	NA	NA	NA	NA	NA	NA
202	UGT2B11	NA	NA	NA	NA	NA	2.59475	1.19326	1.67407	0.195714	0.63267	4.01462	1.43358	7.71975	0.00546199	0.0102549	4.01456	1.43216	7.71923	0.00546358	0.017756	NA	NA	NA	NA	NA	NA	NA	NA	NA	NA	NA	NA	NA	NA	NA	NA	NA	NA	NA	NA	NA	NA	NA	NA	NA	NA	NA
203	DNTT	4.5247	1.75288	7.32435	0.00680265	0.0413102	4.52475	1.75124	7.29806	0.00690289	0.0683887	4.00904	1.52289	8.50434	0.003543	0.00687309	4.00897	1.52146	8.50373	0.0035442	0.0119024	NA	NA	NA	NA	NA	NA	NA	NA	NA	NA	NA	NA	NA	NA	NA	NA	NA	NA	NA	NA	NA	NA	NA	NA	NA	NA	NA
204	ZNHIT6	4.33481	7.02949	73.0197	1.28e-17	2.43e-15	4.33491	7.02788	73.0984	1.23342e-17	3.81688e-15	4.00203	6.87791	699.82	3.27e-154	3.31e-152	4.00189	6.87644	699.759	3.37405e-154	5.86777e-152	NA	NA	NA	NA	NA	NA	NA	NA	NA	NA	NA	NA	5.47732	1.63957	0.299339	4	5.47732	545049	470	4	1.63957	0.299339	4	0.0557194	0.653664	8.29417	1.09347e-16
205	THSD7A	5.15577	3.0169	13.9996	0.000182853	0.00254786	5.15582	3.01527	13.9339	0.000189355	0.00431234	4.00083	1.58742	9.19073	0.00243243	0.00488214	4.00075	1.586	9.19005	0.00243334	0.00845104	NA	NA	NA	NA	NA	NA	NA	NA	4.45265	0	0	1	NA	NA	NA	NA	4.45265	364812	1657	3	0	0	1	-0.0644119	2.27773	1.98314	0.0473514
206	MAS1	3.89242	1.56517	4.67274	0.0306451	0.118427	3.89259	1.56353	4.64167	0.0312046	0.19607	3.99266	1.42587	7.59545	0.00585157	0.0109223	3.9926	1.42445	7.59493	0.00585325	0.0189114	NA	NA	NA	NA	NA	NA	NA	NA	NA	NA	NA	NA	NA	NA	NA	NA	NA	NA	NA	NA	NA	NA	NA	NA	NA	NA	NA
207	MLK4	4.2268	2.15025	7.14632	0.00751181	0.0442148	4.22697	2.14861	7.08124	0.00778949	0.0742029	3.98473	2.13514	17.1605	3.43e-05	9.39e-05	3.98463	2.13371	17.1591	3.43754e-05	0.000162626	NA	NA	NA	NA	NA	NA	NA	NA	NA	NA	NA	NA	NA	NA	NA	NA	NA	NA	NA	NA	NA	NA	NA	NA	NA	NA	NA
208	FOXD3	3.64759	1.50696	4.00458	0.0453769	0.153901	3.64765	1.50532	3.98021	0.0460378	0.253805	3.98393	1.42289	7.54656	0.00601248	0.0111917	3.98387	1.42147	7.54604	0.00601419	0.0193778	NA	NA	NA	NA	NA	NA	NA	NA	NA	NA	NA	NA	NA	NA	NA	NA	NA	NA	NA	NA	NA	NA	NA	NA	NA	NA	NA
209	CD96	NA	NA	NA	NA	NA	2.52863	1.36196	1.92273	0.165556	0.571657	3.97678	1.64173	9.76711	0.00177662	0.00366199	3.9767	1.6403	9.76637	0.00177733	0.00633906	NA	NA	NA	NA	NA	NA	NA	NA	NA	NA	NA	NA	NA	NA	NA	NA	NA	NA	NA	NA	NA	NA	NA	NA	NA	NA	NA
210	RAI2	1.66251	2.08104	1.37802	0.240439	0.446823	1.66261	2.0794	1.35864	0.243773	0.715129	3.96266	1.52894	8.45033	0.00364977	0.00706529	3.96259	1.52751	8.44971	0.00365101	0.0122338	NA	NA	NA	NA	NA	NA	NA	NA	NA	NA	NA	NA	NA	NA	NA	NA	NA	NA	NA	NA	NA	NA	NA	NA	NA	NA	NA
211	LPPR5	4.25403	1.76874	6.36297	0.0116527	0.0602351	4.25388	1.7671	6.31387	0.0119797	0.100468	3.95878	1.61029	9.34648	0.00223415	0.00451848	3.9587	1.60886	9.34577	0.00223501	0.0078242	NA	NA	NA	NA	NA	NA	NA	NA	NA	NA	NA	NA	NA	NA	NA	NA	NA	NA	NA	NA	NA	NA	NA	NA	NA	NA	NA
212	SLC2A3	4.39233	9.73575	60.5959	7.01e-15	1.05e-12	4.39241	9.73415	60.6433	6.8413e-15	1.67397e-12	3.95818	9.99548	2809.3	0	0	3.95804	9.994	2793.66	0	0	NA	NA	NA	NA	NA	NA	NA	NA	NA	NA	NA	NA	4.47047	2.40141	0.537172	20	4.47047	1.03752e+06	496	4	2.40141	0.537172	20	-0.00712423	0.172898	25.8973	7.14867e-148
213	FKSG52	3.7097	4.53048	37.7449	8.06e-10	5.83e-08	3.7098	4.52885	37.6662	8.39484e-10	9.86886e-08	3.9479	4.1009	92.6776	6.15e-22	6.21e-21	3.94777	4.09945	92.6694	6.18017e-22	1.08014e-20	NA	NA	NA	NA	NA	NA	NA	NA	NA	NA	NA	NA	NA	NA	NA	NA	NA	NA	NA	NA	NA	NA	NA	NA	NA	NA	NA
214	HGF	1.2363	2.34035	2.18366	0.139483	0.319617	1.23643	2.33871	2.17332	0.140423	0.51775	3.92589	1.48218	7.88194	0.00499309	0.0094358	3.92582	1.48075	7.88137	0.00499467	0.0163406	NA	NA	NA	NA	NA	NA	NA	NA	-7.21882	0	0	1	6.51555	0	0	1	-0.351637	1.17982e+06	728	3.5	6.86719	-19.5292	2	0.148172	1.53782	-0.325012	0.745172
215	B3GNT4	1.6406	1.83855	1.92625	0.165169	0.355484	1.64061	1.83691	1.91221	0.166718	0.573994	3.90851	1.74384	10.8646	0.000980221	0.00212192	3.90842	1.74241	10.8637	0.000980675	0.00367522	NA	NA	NA	NA	NA	NA	NA	NA	NA	NA	NA	NA	NA	NA	NA	NA	NA	NA	NA	NA	NA	NA	NA	NA	NA	NA	NA
216	BIK	NA	NA	NA	NA	NA	3.02891	1.34975	2.50009	0.11384	0.452928	3.87804	1.49665	7.90625	0.00492643	0.00932432	3.87796	1.49523	7.90567	0.00492802	0.0161426	NA	NA	NA	NA	NA	NA	NA	NA	NA	NA	NA	NA	NA	NA	NA	NA	NA	NA	NA	NA	NA	NA	NA	NA	NA	NA	NA
217	SRSF12	NA	NA	NA	NA	NA	1.74694	1.25322	0.865107	0.352313	0.875883	3.86023	1.49014	7.79585	0.00523663	0.0098623	3.86016	1.48872	7.79528	0.0052383	0.0170766	NA	NA	NA	NA	NA	NA	NA	NA	NA	NA	NA	NA	NA	NA	NA	NA	NA	NA	NA	NA	NA	NA	NA	NA	NA	NA	NA
218	WNT16	2.97879	1.5356	3.156	0.0756481	0.215293	2.97888	1.53396	3.13363	0.0766926	0.353467	3.85933	1.96624	13.8674	0.000196176	0.000477477	3.85922	1.96481	13.8662	0.000196296	0.000826847	NA	NA	NA	NA	NA	NA	NA	NA	NA	NA	NA	NA	NA	NA	NA	NA	NA	NA	NA	NA	NA	NA	NA	NA	NA	NA	NA
219	C12orf50	3.5035	6.04286	53.6691	2.37e-13	3.11e-11	3.50359	6.04125	53.695	2.34164e-13	5.02611e-11	3.8474	5.94793	350.517	3.27e-78	1.32e-76	3.84727	5.94647	350.486	3.32158e-78	2.31444e-76	NA	NA	NA	NA	NA	NA	NA	NA	NA	NA	NA	NA	NA	NA	NA	NA	NA	NA	NA	NA	NA	NA	NA	NA	NA	NA	NA
220	ZNF705D	5.70409	2.44633	18.3621	1.83e-05	0.000374657	5.70414	2.4447	18.3631	1.82564e-05	0.000613688	3.84309	1.76832	10.9922	0.000914944	0.00199089	3.843	1.76689	10.9914	0.000915379	0.00344771	NA	NA	NA	NA	NA	NA	NA	NA	NA	NA	NA	NA	NA	NA	NA	NA	NA	NA	NA	NA	NA	NA	NA	NA	NA	NA	NA
221	C15orf60	4.61022	1.7888	6.6623	0.00984738	0.0531017	4.61051	1.78716	6.60308	0.0101803	0.0892597	3.84249	1.37552	6.79432	0.00914483	0.0163847	3.84244	1.37409	6.79386	0.0091472	0.0283608	NA	NA	NA	NA	NA	NA	NA	NA	NA	NA	NA	NA	NA	NA	NA	NA	NA	NA	NA	NA	NA	NA	NA	NA	NA	NA	NA
222	LIPG	1.71818	1.47918	1.23086	0.26724	0.477955	1.71823	1.47754	1.22205	0.268958	0.75843	3.84085	1.37499	6.78601	0.00918749	0.0164492	3.84079	1.37357	6.78555	0.00918986	0.0284783	NA	NA	NA	NA	NA	NA	NA	NA	NA	NA	NA	NA	NA	NA	NA	NA	NA	NA	NA	NA	NA	NA	NA	NA	NA	NA	NA
223	AC006967.1	NA	NA	NA	NA	NA	3.07121	1.28522	2.43446	0.118695	0.465132	3.82848	1.37099	6.72373	0.00951386	0.0169586	3.82842	1.36957	6.72327	0.0095163	0.0293581	NA	NA	NA	NA	NA	NA	NA	NA	NA	NA	NA	NA	NA	NA	NA	NA	NA	NA	NA	NA	NA	NA	NA	NA	NA	NA	NA
224	TYW1B	2.42427	3.97877	10.7688	0.00103224	0.0101573	2.42437	3.97714	10.7186	0.00106066	0.0169987	3.825	3.73916	67.9557	1.67e-16	1.22e-15	3.82487	3.73772	67.9496	1.67726e-16	2.11471e-15	NA	NA	NA	NA	NA	NA	NA	NA	NA	NA	NA	NA	NA	NA	NA	NA	NA	NA	NA	NA	NA	NA	NA	NA	NA	NA	NA
225	FAT3	4.81605	3.1295	24.5163	7.37e-07	2.32e-05	4.81609	3.12787	24.3778	7.91751e-07	4.07355e-05	3.8222	1.97242	13.8267	0.000200463	0.000487131	3.8221	1.97099	13.8256	0.000200586	0.000843173	NA	NA	NA	NA	NA	NA	NA	NA	NA	NA	NA	NA	NA	NA	NA	NA	NA	NA	NA	NA	NA	NA	NA	NA	NA	NA	NA
226	SGK1	3.29808	7.75679	17.0225	3.69e-05	0.000684566	3.29822	7.75517	16.9988	3.74039e-05	0.0011325	3.8169	7.98031	1434.4	7.02865789413925e-314	1.74353748373983e-311	3.81676	7.97883	1434.27	7.49910767245978e-314	3.2204841377873e-311	NA	NA	NA	NA	NA	NA	NA	NA	NA	NA	NA	NA	NA	NA	NA	NA	NA	NA	NA	NA	NA	NA	NA	NA	NA	NA	NA
227	RNF125	4.45734	1.98044	8.50821	0.00353547	0.0258057	4.45753	1.9788	8.45206	0.0036463	0.0432277	3.81622	2.44353	22.3902	2.23e-06	7.18e-06	3.8161	2.4421	22.3882	2.22733e-06	1.24389e-05	NA	NA	NA	NA	NA	NA	NA	NA	NA	NA	NA	NA	NA	NA	NA	NA	NA	NA	NA	NA	NA	NA	NA	NA	NA	NA	NA
228	SYT14	1.49219	1.84338	1.53278	0.215695	0.418599	1.49235	1.84173	1.51638	0.218168	0.671678	3.8121	1.7146	10.2109	0.00139611	0.0029329	3.812	1.71318	10.2101	0.00139673	0.00507887	NA	NA	NA	NA	NA	NA	NA	NA	NA	NA	NA	NA	NA	NA	NA	NA	NA	NA	NA	NA	NA	NA	NA	NA	NA	NA	NA
229	COLEC12	1.21362	2.335	1.80375	0.17926	0.374384	1.21362	2.33336	1.78286	0.181799	0.604837	3.80722	1.81528	11.5095	0.000692427	0.00154006	3.80712	1.81386	11.5085	0.000692776	0.00266705	NA	NA	NA	NA	NA	NA	NA	NA	NA	NA	NA	NA	NA	NA	NA	NA	NA	NA	NA	NA	NA	NA	NA	NA	NA	NA	NA
230	TRIM64B	8.97343	5.0529	38.9801	4.28e-10	3.32e-08	8.97347	5.05128	38.8688	4.53275e-10	5.74594e-08	3.7932	6.39034	472.978	7.21e-105	3.98e-103	3.79307	6.38887	472.935	7.36288e-105	7.01073e-103	NA	NA	NA	NA	NA	NA	NA	NA	NA	NA	NA	NA	NA	NA	NA	NA	NA	NA	NA	NA	NA	NA	NA	NA	NA	NA	NA
231	GEM	2.18771	4.40381	7.51943	0.00610371	0.0382553	2.18781	4.40218	7.48157	0.00623335	0.0636441	3.78988	5.06144	182.551	1.34e-41	2.65e-40	3.78975	5.05999	182.535	1.35536e-41	4.63e-40	NA	NA	NA	NA	NA	NA	NA	NA	NA	NA	NA	NA	NA	NA	NA	NA	NA	NA	NA	NA	NA	NA	NA	NA	NA	NA	NA
232	AGXT	4.62918	1.83511	7.75015	0.00537082	0.0348859	4.62936	1.83347	7.70613	0.00550337	0.0581071	3.76143	1.34969	6.39527	0.0114425	0.0200813	3.76137	1.34827	6.39484	0.0114453	0.0347637	NA	NA	NA	NA	NA	NA	NA	NA	NA	NA	NA	NA	NA	NA	NA	NA	NA	NA	NA	NA	NA	NA	NA	NA	NA	NA	NA
233	PRAMEF22	NA	NA	NA	NA	NA	2.70434	1.21234	1.82824	0.176335	0.593807	3.76024	1.49971	7.64673	0.00568753	0.0106471	3.76017	1.49829	7.64615	0.00568935	0.0184328	NA	NA	NA	NA	NA	NA	NA	NA	NA	NA	NA	NA	NA	NA	NA	NA	NA	NA	NA	NA	NA	NA	NA	NA	NA	NA	NA
234	RBP7	NA	NA	NA	NA	NA	2.34765	1.18151	1.33166	0.24851	0.72279	3.75828	1.74898	10.4864	0.00120258	0.00255236	3.75818	1.74755	10.4855	0.00120314	0.0044192	NA	NA	NA	NA	NA	NA	NA	NA	NA	NA	NA	NA	NA	NA	NA	NA	NA	NA	NA	NA	NA	NA	NA	NA	NA	NA	NA
235	HOOK1	4.34494	2.13559	10.1194	0.00146714	0.013242	4.34511	2.13395	10.0572	0.0015175	0.0223462	3.75178	1.57251	8.38654	0.0037801	0.00730015	3.75169	1.57109	8.38588	0.00378146	0.0126387	NA	NA	NA	NA	NA	NA	NA	NA	NA	NA	NA	NA	NA	NA	NA	NA	NA	NA	NA	NA	NA	NA	NA	NA	NA	NA	NA
236	GFOD1	3.3242	2.37549	10.6754	0.00108567	0.0105459	3.32429	2.37385	10.6325	0.00111116	0.0175938	3.7484	2.12296	15.9469	6.51e-05	0.000171279	3.74829	2.12153	15.9456	6.51907e-05	0.000296607	NA	NA	NA	NA	NA	NA	NA	NA	NA	NA	NA	NA	NA	NA	NA	NA	NA	NA	NA	NA	NA	NA	NA	NA	NA	NA	NA
237	RAB11FIP1	2.26068	6.34449	14.7552	0.000122409	0.00185867	2.26078	6.34286	14.7439	0.000123145	0.00305944	3.72677	5.9506	340.576	4.78e-76	1.84e-74	3.72663	5.94913	340.545	4.85537e-76	3.24354e-74	NA	NA	NA	NA	NA	NA	NA	NA	NA	NA	NA	NA	NA	NA	NA	NA	NA	NA	NA	NA	NA	NA	NA	NA	NA	NA	NA
238	KL	3.57461	1.46181	3.69718	0.0545044	0.174157	3.57462	1.46016	3.67685	0.055173	0.286385	3.72496	1.62424	8.8921	0.00286408	0.00565511	3.72487	1.62281	8.89139	0.00286519	0.00979086	NA	NA	NA	NA	NA	NA	NA	NA	NA	NA	NA	NA	NA	NA	NA	NA	NA	NA	NA	NA	NA	NA	NA	NA	NA	NA	NA
239	GTF2F1	3.81022	9.35616	78.1314	9.64e-19	2.14e-16	3.81032	9.35456	78.3885	8.4642e-19	3.0709e-16	3.69447	9.37378	3125.97	0	0	3.69434	9.37231	3139.07	0	0	0.905046	0.95279	1.05275	3	-0.117795	0	0	1	1.92673	0.616021	0.319724	16	1.8938	1.85281	0.978361	22	1.92673	1.3938e+06	517	3.57895	1.35651	0.704048	38	-0.00191477	0.129082	14.9413	1.77574e-50
240	C3orf80	4.1063	1.61718	5.30782	0.02123	0.0926164	4.10622	1.61553	5.26893	0.0217093	0.154022	3.69122	1.32817	6.06732	0.0137706	0.0237219	3.69116	1.32675	6.0669	0.0137738	0.0410542	NA	NA	NA	NA	NA	NA	NA	NA	NA	NA	NA	NA	NA	NA	NA	NA	NA	NA	NA	NA	NA	NA	NA	NA	NA	NA	NA
241	B3GNT2	3.96746	6.09009	79.6214	4.53e-19	1.04e-16	3.96755	6.08848	79.758	4.23188e-19	1.59021e-16	3.69106	6.25145	417.52	8.46e-93	4.1e-91	3.69093	6.24999	417.482	8.62084e-93	7.22742e-91	NA	NA	NA	NA	NA	NA	NA	NA	NA	NA	NA	NA	NA	NA	NA	NA	NA	NA	NA	NA	NA	NA	NA	NA	NA	NA	NA
242	PEG10	2.79784	9.29349	29.711	5.02e-08	2.24e-06	2.79794	9.29188	29.7402	4.93986e-08	3.6346e-06	3.68968	9.39514	1905.77	0	0	3.68954	9.39366	1891.76	0	0	14.2967	0	0	1	NA	NA	NA	NA	4.00829	2.05291	0.512166	10	6.57578	2.75959	0.41966	19	5.89982	480876	708	3.65517	3.10424	0.526159	29	-0.0132403	0.146656	40.3194	0
243	MED12L	3.91011	2.02019	6.60991	0.0101413	0.0543626	3.91033	2.01855	6.54734	0.0105041	0.091234	3.68125	1.42617	6.76016	0.00932157	0.0166598	3.68118	1.42474	6.75965	0.00932419	0.0288458	NA	NA	NA	NA	NA	NA	NA	NA	NA	NA	NA	NA	NA	NA	NA	NA	NA	NA	NA	NA	NA	NA	NA	NA	NA	NA	NA
244	HIST1H1T	NA	NA	NA	NA	NA	2.39918	1.21768	1.42964	0.231823	0.69759	3.67802	1.40377	6.55803	0.0104412	0.0184573	3.67795	1.40234	6.55755	0.010444	0.0319484	NA	NA	NA	NA	NA	NA	NA	NA	NA	NA	NA	NA	NA	NA	NA	NA	NA	NA	NA	NA	NA	NA	NA	NA	NA	NA	NA
245	C19orf21	2.24806	1.71873	2.82088	0.0930451	0.245972	2.24822	1.71709	2.8084	0.0937716	0.401472	3.65895	1.93601	12.6834	0.00036891	0.000860013	3.65885	1.93458	12.6823	0.000369124	0.00148945	NA	NA	NA	NA	NA	NA	NA	NA	NA	NA	NA	NA	NA	NA	NA	NA	NA	NA	NA	NA	NA	NA	NA	NA	NA	NA	NA
246	HES2	NA	NA	NA	NA	NA	1.46115	1.29867	0.681511	0.409067	0.948598	3.64549	1.46746	7.0548	0.00790533	0.014346	3.64541	1.46604	7.05426	0.00790771	0.0248398	NA	NA	NA	NA	NA	NA	NA	NA	NA	NA	NA	NA	NA	NA	NA	NA	NA	NA	NA	NA	NA	NA	NA	NA	NA	NA	NA
247	TNFAIP6	-1.81281	4.42719	3.04708	0.0808827	0.224609	-1.81266	4.42551	3.0381	0.0813311	0.36626	3.64301	4.36515	104.807	1.35e-24	1.49e-23	3.64288	4.3637	104.797	1.35324e-24	2.5864e-23	NA	NA	NA	NA	NA	NA	NA	NA	NA	NA	NA	NA	NA	NA	NA	NA	NA	NA	NA	NA	NA	NA	NA	NA	NA	NA	NA
248	TRIM51EP	7.18333	3.47198	32.1257	1.45e-08	7.59e-07	7.18336	3.47035	31.9912	1.54873e-08	1.31705e-06	3.64175	3.39173	49.0288	2.52e-12	1.4e-11	3.64162	3.39029	49.0244	2.52803e-12	2.43021e-11	NA	NA	NA	NA	NA	NA	NA	NA	NA	NA	NA	NA	NA	NA	NA	NA	NA	NA	NA	NA	NA	NA	NA	NA	NA	NA	NA
249	TRPC6	3.66929	1.46581	3.86837	0.0492042	0.162761	3.66922	1.46417	3.84711	0.0498318	0.267844	3.63889	1.38274	6.29001	0.0121421	0.021202	3.63882	1.38132	6.28955	0.0121452	0.0367043	NA	NA	NA	NA	NA	NA	NA	NA	NA	NA	NA	NA	NA	NA	NA	NA	NA	NA	NA	NA	NA	NA	NA	NA	NA	NA	NA
250	CYP1A1	3.97129	1.9917	7.71415	0.00547897	0.0352855	3.9715	1.99006	7.6628	0.0056371	0.0590451	3.63187	1.83137	11.1521	0.000839348	0.00183957	3.63177	1.82995	11.1512	0.000839774	0.00318518	NA	NA	NA	NA	NA	NA	NA	NA	NA	NA	NA	NA	NA	NA	NA	NA	NA	NA	NA	NA	NA	NA	NA	NA	NA	NA	NA
251	C6orf141	NA	NA	NA	NA	NA	1.49072	1.21634	0.608729	0.435267	0.975705	3.61857	1.30659	5.7444	0.0165413	0.0279794	3.61852	1.30517	5.74401	0.016545	0.0484156	NA	NA	NA	NA	NA	NA	NA	NA	NA	NA	NA	NA	NA	NA	NA	NA	NA	NA	NA	NA	NA	NA	NA	NA	NA	NA	NA
252	TRIM51GP	6.39518	2.85573	26.9944	2.04e-07	7.5e-06	6.39522	2.8541	26.8424	2.20739e-07	1.32336e-05	3.60576	2.6003	24.5013	7.43e-07	2.52e-06	3.60564	2.59887	24.4991	7.43455e-07	4.36632e-06	NA	NA	NA	NA	NA	NA	NA	NA	NA	NA	NA	NA	NA	NA	NA	NA	NA	NA	NA	NA	NA	NA	NA	NA	NA	NA	NA
253	SPANXN3	NA	NA	NA	NA	NA	0.417195	0.996088	0.0753998	0.783631	1	3.60396	2.04468	14.0745	0.000175713	0.000430951	3.60385	2.04325	14.0732	0.000175827	0.000746256	NA	NA	NA	NA	NA	NA	NA	NA	NA	NA	NA	NA	NA	NA	NA	NA	NA	NA	NA	NA	NA	NA	NA	NA	NA	NA	NA
254	ZRSR1	3.95336	2.7883	15.1614	9.87e-05	0.00156524	3.95351	2.78667	15.072	0.000103485	0.00267522	3.59811	1.80661	10.7167	0.0010617	0.00227923	3.59801	1.80519	10.7158	0.00106222	0.00394639	NA	NA	NA	NA	NA	NA	NA	NA	NA	NA	NA	NA	NA	NA	NA	NA	NA	NA	NA	NA	NA	NA	NA	NA	NA	NA	NA
255	CTH	2.9422	3.59436	19.5187	9.96e-06	0.000223525	2.94231	3.59273	19.3899	1.0657e-05	0.000388657	3.59807	3.86316	70.4754	4.66e-17	3.5e-16	3.59794	3.86172	70.4688	4.67596e-17	6.06759e-16	NA	NA	NA	NA	NA	NA	NA	NA	NA	NA	NA	NA	NA	NA	NA	NA	NA	NA	NA	NA	NA	NA	NA	NA	NA	NA	NA
256	DNAH7	2.30576	2.05178	3.71352	0.0539736	0.172976	2.30601	2.05014	3.67904	0.0551007	0.286164	3.5965	2.0604	14.2842	0.000157181	0.00038777	3.59639	2.05898	14.2829	0.000157286	0.000671624	NA	NA	NA	NA	NA	NA	NA	NA	NA	NA	NA	NA	NA	NA	NA	NA	NA	NA	NA	NA	NA	NA	NA	NA	NA	NA	NA
257	LACC1	2.30724	5.85007	3.99513	0.0456319	0.15444	2.30731	5.84844	3.98493	0.045909	0.253493	3.59648	5.62472	260.355	1.44e-58	4.23e-57	3.59635	5.62326	260.331	1.45333e-58	7.40495e-57	NA	NA	NA	NA	NA	NA	NA	NA	NA	NA	NA	NA	NA	NA	NA	NA	NA	NA	NA	NA	NA	NA	NA	NA	NA	NA	NA
258	GCH1	0.110228	2.0637	0.0142422	0.905006	0.950844	0.110301	2.06205	0.0141895	0.905181	1	3.59396	2.37241	19.6591	9.26e-06	2.74e-05	3.59384	2.37098	19.6573	9.26472e-06	4.74811e-05	NA	NA	NA	NA	NA	NA	NA	NA	NA	NA	NA	NA	NA	NA	NA	NA	NA	NA	NA	NA	NA	NA	NA	NA	NA	NA	NA
259	SOX9	4.38765	7.68332	44.9397	2.03e-11	2.06e-09	4.38777	7.68171	44.9234	2.04899e-11	3.42197e-09	3.57031	7.71846	1121.48	7.08e-246	1.2e-243	3.57018	7.71699	1121.38	7.46439e-246	2.18157e-243	NA	NA	NA	NA	NA	NA	NA	NA	2.94811	0	0	1	7.03347	0.342414	0.0486836	2	6.69105	815730	509	3.66667	2.21389	0.330873	3	0.025102	0.76236	8.74383	2.25337e-18
260	PPP1R9A	4.05468	4.42801	33.6702	6.53e-09	3.68e-07	4.05478	4.42638	33.5926	6.79515e-09	6.29913e-07	3.55976	3.14454	39.0233	4.19e-10	1.96e-09	3.55963	3.14311	39.0197	4.19542e-10	3.4034e-09	NA	NA	NA	NA	NA	NA	NA	NA	NA	NA	NA	NA	NA	NA	NA	NA	NA	NA	NA	NA	NA	NA	NA	NA	NA	NA	NA
261	CD9	2.91088	5.06772	10.1982	0.0014058	0.0128136	2.91099	5.06609	10.1611	0.00143435	0.0213458	3.55802	5.40522	219.966	9.2e-50	2.26e-48	3.55789	5.40376	219.945	9.29867e-50	3.95297e-48	NA	NA	NA	NA	NA	NA	NA	NA	NA	NA	NA	NA	NA	NA	NA	NA	NA	NA	NA	NA	NA	NA	NA	NA	NA	NA	NA
262	NOV	1.29014	2.55319	2.05872	0.151337	0.335808	1.29051	2.55155	2.02369	0.154862	0.5476	3.55401	2.96055	33.3033	7.89e-09	3.3e-08	3.55389	2.95912	33.3002	7.89746e-09	5.72266e-08	NA	NA	NA	NA	NA	NA	NA	NA	NA	NA	NA	NA	NA	NA	NA	NA	NA	NA	NA	NA	NA	NA	NA	NA	NA	NA	NA
263	DTNA	2.89965	4.90792	34.0239	5.44e-09	3.17e-07	2.89974	4.90629	33.9014	5.79765e-09	5.4955e-07	3.55169	3.35671	46.4245	9.52e-12	5.07e-11	3.55157	3.35527	46.4202	9.54275e-12	8.78425e-11	NA	NA	NA	NA	NA	NA	NA	NA	NA	NA	NA	NA	NA	NA	NA	NA	NA	NA	NA	NA	NA	NA	NA	NA	NA	NA	NA
264	SP5	3.55539	1.54389	4.0428	0.0443602	0.151773	3.55538	1.54225	4.0154	0.0450865	0.250464	3.55088	1.28723	5.45775	0.0194817	0.0323896	3.55082	1.2858	5.45738	0.0194859	0.0560319	NA	NA	NA	NA	NA	NA	NA	NA	NA	NA	NA	NA	NA	NA	NA	NA	NA	NA	NA	NA	NA	NA	NA	NA	NA	NA	NA
265	MAFB	1.68115	2.311	1.41106	0.234881	0.441445	1.68123	2.30935	1.3937	0.237782	0.704839	3.54146	1.91605	11.9679	0.000541248	0.00122671	3.54136	1.91462	11.9669	0.00054155	0.00212411	NA	NA	NA	NA	NA	NA	NA	NA	NA	NA	NA	NA	NA	NA	NA	NA	NA	NA	NA	NA	NA	NA	NA	NA	NA	NA	NA
266	PRSS12	0.436568	2.39248	0.309149	0.578203	0.748144	0.436632	2.39084	0.307523	0.579204	1	3.53198	1.62573	8.3841	0.00378517	0.00730762	3.53188	1.6243	8.38341	0.00378662	0.0126539	NA	NA	NA	NA	NA	NA	NA	NA	NA	NA	NA	NA	NA	NA	NA	NA	NA	NA	NA	NA	NA	NA	NA	NA	NA	NA	NA
267	SRSF8	4.65211	8.19026	82.6115	9.99e-20	2.38e-17	4.65222	8.18865	82.7697	9.21938e-20	3.59266e-17	3.52723	8.28692	1632.41	0	0	3.5271	8.28545	1632.26	0	0	NA	NA	NA	NA	NA	NA	NA	NA	5.46188	0.518382	0.094909	2	6.61042	5.60352	0.84768	11	5.98026	408480	282	3.84615	3.76173	0.629024	13	0.00326844	0.227978	26.2174	1.68299e-151
268	AC073333.1	4.2255	4.12572	45.8837	1.25e-11	1.3e-09	4.22561	4.12409	45.6212	1.43478e-11	2.43484e-09	3.5243	3.67726	59.6108	1.16e-14	7.53e-14	3.52417	3.67582	59.6052	1.15929e-14	1.30733e-13	NA	NA	NA	NA	NA	NA	NA	NA	NA	NA	NA	NA	NA	NA	NA	NA	NA	NA	NA	NA	NA	NA	NA	NA	NA	NA	NA
269	HPSE	1.59728	3.55873	7.70221	0.00551531	0.0354306	1.59732	3.55709	7.64309	0.00569901	0.0595713	3.51735	3.72348	61.695	4.01e-15	2.69e-14	3.51722	3.72204	61.6892	4.02172e-15	4.66533e-14	NA	NA	NA	NA	NA	NA	NA	NA	NA	NA	NA	NA	NA	NA	NA	NA	NA	NA	NA	NA	NA	NA	NA	NA	NA	NA	NA
270	DDIT4L	1.25063	1.64067	0.881504	0.34779	0.557808	1.25059	1.63902	0.872443	0.35028	0.873024	3.48834	1.40574	6.13218	0.0132743	0.0229255	3.48826	1.40432	6.13171	0.0132779	0.0396546	NA	NA	NA	NA	NA	NA	NA	NA	NA	NA	NA	NA	NA	NA	NA	NA	NA	NA	NA	NA	NA	NA	NA	NA	NA	NA	NA
271	VGF	NA	NA	NA	NA	NA	2.19951	1.3835	1.59371	0.206797	0.650833	3.48815	1.52964	7.27381	0.00699673	0.0128409	3.48806	1.52822	7.27322	0.00699903	0.0222378	NA	NA	NA	NA	NA	NA	NA	NA	NA	NA	NA	NA	NA	NA	NA	NA	NA	NA	NA	NA	NA	NA	NA	NA	NA	NA	NA
272	DBNDD2	3.48015	3.33976	19.9415	7.98e-06	0.000184243	3.48027	3.33812	19.834	8.44663e-06	0.000316831	3.47946	3.02893	34.5369	4.18e-09	1.8e-08	3.47933	3.0275	34.5337	4.18936e-09	3.11178e-08	NA	NA	NA	NA	NA	NA	NA	NA	NA	NA	NA	NA	NA	NA	NA	NA	NA	NA	NA	NA	NA	NA	NA	NA	NA	NA	NA
273	KIF21A	3.31219	5.45822	53.6227	2.43e-13	3.13e-11	3.31228	5.4566	53.3682	2.76533e-13	5.79745e-11	3.47682	4.98727	158.396	2.54e-36	4.3e-35	3.47668	4.98581	158.381	2.55563e-36	7.48998e-35	NA	NA	NA	NA	NA	NA	NA	NA	NA	NA	NA	NA	NA	NA	NA	NA	NA	NA	NA	NA	NA	NA	NA	NA	NA	NA	NA
274	PMAIP1	2.88499	5.67145	33.7964	6.12e-09	3.48e-07	2.88508	5.66983	33.6612	6.55973e-09	6.10781e-07	3.47677	6.49463	465.861	2.55e-103	1.38e-101	3.47664	6.49317	465.816	2.60764e-103	2.44967e-101	NA	NA	NA	NA	NA	NA	NA	NA	NA	NA	NA	NA	NA	NA	NA	NA	NA	NA	NA	NA	NA	NA	NA	NA	NA	NA	NA
275	AXIN2	1.78831	3.21639	7.71147	0.00548711	0.035312	1.78842	3.21475	7.6628	0.0056371	0.0590451	3.47177	3.13631	37.7433	8.07e-10	3.68e-09	3.47164	3.13487	37.7397	8.08413e-10	6.37849e-09	NA	NA	NA	NA	NA	NA	NA	NA	NA	NA	NA	NA	NA	NA	NA	NA	NA	NA	NA	NA	NA	NA	NA	NA	NA	NA	NA
276	FBXO33	3.3555	5.50717	58.287	2.27e-14	3.17e-12	3.3556	5.50555	58.0488	2.55696e-14	5.84848e-12	3.47073	5.66815	258.784	3.16e-58	9.23e-57	3.4706	5.66669	258.759	3.19936e-58	1.61837e-56	NA	NA	NA	NA	NA	NA	NA	NA	NA	NA	NA	NA	NA	NA	NA	NA	NA	NA	NA	NA	NA	NA	NA	NA	NA	NA	NA
277	RGCC	1.79909	2.18618	2.36159	0.124355	0.296393	1.79921	2.18454	2.33153	0.126777	0.484698	3.46735	3.12243	37.2509	1.04e-09	4.69e-09	3.46723	3.121	37.2474	1.04052e-09	8.12454e-09	NA	NA	NA	NA	NA	NA	NA	NA	NA	NA	NA	NA	NA	NA	NA	NA	NA	NA	NA	NA	NA	NA	NA	NA	NA	NA	NA
278	ANKRD33B	1.53987	4.67809	3.05098	0.0806885	0.22433	1.53998	4.67645	3.04249	0.0811115	0.365597	3.46052	3.78377	63.5749	1.54e-15	1.06e-14	3.46039	3.78233	63.5689	1.54854e-15	1.8431e-14	NA	NA	NA	NA	NA	NA	NA	NA	NA	NA	NA	NA	NA	NA	NA	NA	NA	NA	NA	NA	NA	NA	NA	NA	NA	NA	NA
279	WNT11	NA	NA	NA	NA	NA	1.46843	1.20961	0.584662	0.444491	0.985986	3.459	1.32673	5.44452	0.0196299	0.0326087	3.45893	1.3253	5.44411	0.0196344	0.0564126	NA	NA	NA	NA	NA	NA	NA	NA	NA	NA	NA	NA	NA	NA	NA	NA	NA	NA	NA	NA	NA	NA	NA	NA	NA	NA	NA
280	CD83	1.79787	3.21992	7.72643	0.00544181	0.0351165	1.79795	3.21828	7.67791	0.00559009	0.0587001	3.45685	3.28672	42.5922	6.74e-11	3.36e-10	3.45673	3.28529	42.5882	6.7567e-11	5.8271e-10	NA	NA	NA	NA	NA	NA	NA	NA	NA	NA	NA	NA	NA	NA	NA	NA	NA	NA	NA	NA	NA	NA	NA	NA	NA	NA	NA
281	HIST1H4H	1.28668	3.05438	3.10911	0.0778555	0.218743	1.28675	3.05275	3.08968	0.0787902	0.358793	3.45265	3.12057	37.0243	1.17e-09	5.25e-09	3.45252	3.11914	37.0209	1.16873e-09	9.0986e-09	NA	NA	NA	NA	NA	NA	NA	NA	NA	NA	NA	NA	NA	NA	NA	NA	NA	NA	NA	NA	NA	NA	NA	NA	NA	NA	NA
282	CNNM4	3.01876	5.05993	39.0595	4.11e-10	3.2e-08	3.01886	5.0583	38.9075	4.44374e-10	5.66725e-08	3.43781	5.08078	167.588	2.49e-38	4.47e-37	3.43768	5.07932	167.572	2.50938e-38	7.79984e-37	NA	NA	NA	NA	NA	NA	NA	NA	NA	NA	NA	NA	NA	NA	NA	NA	NA	NA	NA	NA	NA	NA	NA	NA	NA	NA	NA
283	RGS16	1.67831	1.79967	1.74815	0.18611	0.382845	1.67851	1.79803	1.72991	0.188422	0.617405	3.43646	1.82526	10.4097	0.00125354	0.00265264	3.43635	1.82384	10.4088	0.00125416	0.00459298	NA	NA	NA	NA	NA	NA	NA	NA	NA	NA	NA	NA	NA	NA	NA	NA	NA	NA	NA	NA	NA	NA	NA	NA	NA	NA	NA
284	SAT1	1.12284	7.54879	4.73793	0.0295045	0.115407	1.12296	7.54716	4.73947	0.0294781	0.188983	3.43554	7.7874	1128.73	1.88e-247	3.27e-245	3.4354	7.78593	1128.62	1.98793e-247	5.97601e-245	NA	NA	NA	NA	NA	NA	NA	NA	NA	NA	NA	NA	6.07572	0.0167842	0.0027625	2	6.07572	399318	171	4	0.0167842	0.0027625	2	0.0205955	1.52617	3.96752	7.26259e-05
285	EGR2	0.488509	2.39885	0.205111	0.650627	0.798903	0.488867	2.39721	0.201832	0.653246	1	3.43295	2.85938	29.3765	5.96e-08	2.27e-07	3.43283	2.85795	29.3738	5.96799e-08	3.93681e-07	NA	NA	NA	NA	NA	NA	NA	NA	NA	NA	NA	NA	NA	NA	NA	NA	NA	NA	NA	NA	NA	NA	NA	NA	NA	NA	NA
286	RASL11B	1.09768	1.66649	0.716409	0.397324	0.603415	1.09771	1.66485	0.708727	0.399867	0.935451	3.41757	1.68161	8.66854	0.00323751	0.0063226	3.41747	1.68019	8.6678	0.00323883	0.0109485	NA	NA	NA	NA	NA	NA	NA	NA	NA	NA	NA	NA	NA	NA	NA	NA	NA	NA	NA	NA	NA	NA	NA	NA	NA	NA	NA
287	AVPI1	2.53314	5.0823	34.4268	4.43e-09	2.62e-07	2.53324	5.08068	34.2631	4.81413e-09	4.6829e-07	3.4174	6.18848	368.559	3.86e-82	1.62e-80	3.41727	6.18702	368.523	3.92454e-82	2.85758e-80	NA	NA	NA	NA	NA	NA	NA	NA	NA	NA	NA	NA	NA	NA	NA	NA	NA	NA	NA	NA	NA	NA	NA	NA	NA	NA	NA
288	HSPA2	4.40664	6.57606	37.5303	9e-10	6.34e-08	4.40674	6.57444	37.4884	9.19591e-10	1.06911e-07	3.40501	7.22046	756.073	1.92e-166	2.1e-164	3.40488	7.219	755.999	1.99041e-166	3.77336e-164	NA	NA	NA	NA	NA	NA	NA	NA	1.56666	0.510754	0.326015	17	2.04298	1.47556	0.722259	17	1.66451	705177	639	3.5	0.961096	0.577405	34	0.00471322	0.139767	11.8754	1.58795e-32
289	RP11-589F5.3	4.83583	3.69969	27.5948	1.5e-07	5.79e-06	4.83592	3.69806	27.4636	1.60076e-07	1.00552e-05	3.39644	2.99858	32.7781	1.03e-08	4.27e-08	3.39631	2.99714	32.7749	1.0347e-08	7.40837e-08	NA	NA	NA	NA	NA	NA	NA	NA	NA	NA	NA	NA	NA	NA	NA	NA	NA	NA	NA	NA	NA	NA	NA	NA	NA	NA	NA
290	RBBP6	3.10228	8.70813	29.5833	5.36e-08	2.38e-06	3.10238	8.70652	29.5908	5.33569e-08	3.87169e-06	3.39534	9.63913	2539.13	0	0	3.39521	9.63766	2535.54	0	0	NA	NA	NA	NA	NA	NA	NA	NA	2.67864	1.00394	0.374796	8	5.30287	2.56992	0.484628	20	4.60931	636416	1792	3.71429	2.93145	0.635985	28	-0.0108994	0.153799	30.0406	2.8957e-198
291	CCL20	0.283614	4.45984	0.212917	0.64449	0.794965	0.283699	4.45821	0.212405	0.644889	1	3.39427	5.28225	191.341	1.62e-43	3.38e-42	3.39414	5.2808	191.322	1.63557e-43	5.90348e-42	NA	NA	NA	NA	NA	NA	NA	NA	2.58205	0	0	1	1.82923	0	0	1	2.20564	1.48904e+06	96	3.5	0.376407	0.170657	2	0.0734313	1.41158	1.51051	0.130913
292	HERC5	-0.873232	6.18398	0.939382	0.332437	0.545202	-0.873116	6.18232	0.937025	0.333044	0.852896	3.39192	2.97387	32.0365	1.51e-08	6.15e-08	3.3918	2.97244	32.0334	1.51542e-08	1.06616e-07	NA	NA	NA	NA	NA	NA	NA	NA	NA	NA	NA	NA	NA	NA	NA	NA	NA	NA	NA	NA	NA	NA	NA	NA	NA	NA	NA
293	ALPP	4.24653	1.63862	5.70071	0.016958	0.0789348	4.24652	1.63698	5.65849	0.0173711	0.131584	3.3886	1.65986	8.34663	0.00386404	0.00745277	3.3885	1.65844	8.34591	0.00386556	0.0129075	NA	NA	NA	NA	NA	NA	NA	NA	NA	NA	NA	NA	NA	NA	NA	NA	NA	NA	NA	NA	NA	NA	NA	NA	NA	NA	NA
294	FAM90A1	4.59468	2.91969	12.3585	0.000438985	0.00515597	4.59478	2.91805	12.2941	0.000454383	0.00871611	3.38778	2.70992	25.3374	4.81e-07	1.67e-06	3.38766	2.70849	25.335	4.8189e-07	2.89561e-06	NA	NA	NA	NA	NA	NA	NA	NA	NA	NA	NA	NA	NA	NA	NA	NA	NA	NA	NA	NA	NA	NA	NA	NA	NA	NA	NA
295	DUSP8	2.42286	2.75643	5.03075	0.0249011	0.103575	2.42294	2.75479	4.99276	0.0254536	0.171783	3.38175	1.88265	10.9338	0.000944242	0.00204988	3.38164	1.88122	10.9329	0.00094474	0.00355003	NA	NA	NA	NA	NA	NA	NA	NA	NA	NA	NA	NA	NA	NA	NA	NA	NA	NA	NA	NA	NA	NA	NA	NA	NA	NA	NA
296	MAFA	2.90311	1.55245	3.11457	0.0775948	0.218465	2.90327	1.55081	3.09166	0.0786944	0.358544	3.37982	1.39548	5.80005	0.0160257	0.0271867	3.37974	1.39405	5.79959	0.0160299	0.0470456	NA	NA	NA	NA	NA	NA	NA	NA	NA	NA	NA	NA	NA	NA	NA	NA	NA	NA	NA	NA	NA	NA	NA	NA	NA	NA	NA
297	KLF4	1.55218	5.33655	4.41323	0.0356614	0.131378	1.5523	5.33491	4.39464	0.0360521	0.216323	3.35508	5.46536	215.615	8.18e-49	1.97e-47	3.35495	5.4639	215.594	8.26804e-49	3.44523e-47	NA	NA	NA	NA	NA	NA	NA	NA	NA	NA	NA	NA	NA	NA	NA	NA	NA	NA	NA	NA	NA	NA	NA	NA	NA	NA	NA
298	PCDHA1	3.07379	1.38713	2.69285	0.100799	0.258552	3.07385	1.38548	2.67991	0.101621	0.421468	3.34528	1.55351	7.13995	0.00753852	0.0137398	3.34519	1.55208	7.13935	0.00754106	0.0237911	NA	NA	NA	NA	NA	NA	NA	NA	NA	NA	NA	NA	NA	NA	NA	NA	NA	NA	NA	NA	NA	NA	NA	NA	NA	NA	NA
299	FRAT2	2.07721	2.67616	6.77312	0.00925409	0.0508401	2.07733	2.67452	6.73008	0.00948002	0.0847803	3.34278	2.57977	22.1444	2.53e-06	8.1e-06	3.34266	2.57834	22.1423	2.53164e-06	1.40414e-05	NA	NA	NA	NA	NA	NA	NA	NA	NA	NA	NA	NA	NA	NA	NA	NA	NA	NA	NA	NA	NA	NA	NA	NA	NA	NA	NA
300	MREG	3.41177	4.19293	40.106	2.41e-10	1.97e-08	3.41187	4.1913	39.8946	2.68049e-10	3.56998e-08	3.32814	3.5638	51.1722	8.46e-13	4.89e-12	3.32801	3.56236	51.1672	8.4822e-13	8.47938e-12	NA	NA	NA	NA	NA	NA	NA	NA	NA	NA	NA	NA	NA	NA	NA	NA	NA	NA	NA	NA	NA	NA	NA	NA	NA	NA	NA
301	HIST1H2BD	1.06731	3.2122	3.32164	0.0683734	0.201178	1.06745	3.21056	3.29748	0.0693864	0.330713	3.32794	3.55308	50.7303	1.06e-12	6.08e-12	3.32781	3.55164	50.7254	1.06236e-12	1.05449e-11	NA	NA	NA	NA	NA	NA	NA	NA	NA	NA	NA	NA	NA	NA	NA	NA	NA	NA	NA	NA	NA	NA	NA	NA	NA	NA	NA
302	SYNJ1	3.49098	7.08985	70.3659	4.93e-17	8.68e-15	3.49109	7.08824	70.5476	4.49285e-17	1.29511e-14	3.31481	6.49096	441.114	6.19e-98	3.18e-96	3.31468	6.48949	441.071	6.33058e-98	5.62086e-96	NA	NA	NA	NA	NA	NA	NA	NA	NA	NA	NA	NA	1.23875	0.176692	0.142637	2	1.23875	41191.5	1612	4	0.176692	0.142637	2	0.0296723	1.45883	0.828802	0.407216
303	THEMIS	NA	NA	NA	NA	NA	2.61594	1.2592	1.75003	0.185872	0.612386	3.31293	1.31011	5.00134	0.0253277	0.0410697	3.31286	1.30869	5.00096	0.0253333	0.0710405	NA	NA	NA	NA	NA	NA	NA	NA	NA	NA	NA	NA	NA	NA	NA	NA	NA	NA	NA	NA	NA	NA	NA	NA	NA	NA	NA
304	HEY1	2.94872	4.52317	7.63485	0.00572511	0.0365412	2.94883	4.52154	7.60772	0.0058119	0.0604547	3.29058	3.85195	63.4477	1.65e-15	1.13e-14	3.29045	3.85051	63.4414	1.65207e-15	1.96077e-14	NA	NA	NA	NA	NA	NA	NA	NA	NA	NA	NA	NA	NA	NA	NA	NA	NA	NA	NA	NA	NA	NA	NA	NA	NA	NA	NA
305	HIST1H2BO	4.23053	1.89334	7.5509	0.00599801	0.0377769	4.23072	1.8917	7.50705	0.00614579	0.0630857	3.28553	1.77386	9.2839	0.00231177	0.00466228	3.28542	1.77243	9.28306	0.00231282	0.00807378	NA	NA	NA	NA	NA	NA	NA	NA	NA	NA	NA	NA	NA	NA	NA	NA	NA	NA	NA	NA	NA	NA	NA	NA	NA	NA	NA
306	CCRL1	2.75334	1.67174	3.37751	0.066092	0.196398	2.75352	1.67009	3.34599	0.067369	0.323686	3.28382	1.44891	6.03009	0.014064	0.0241657	3.28373	1.44748	6.02959	0.014068	0.0418303	NA	NA	NA	NA	NA	NA	NA	NA	NA	NA	NA	NA	NA	NA	NA	NA	NA	NA	NA	NA	NA	NA	NA	NA	NA	NA	NA
307	EPPK1	2.53823	1.62339	2.8238	0.0928763	0.245752	2.53847	1.62175	2.79922	0.0943105	0.402551	3.28213	1.56637	7.09782	0.00771778	0.0140371	3.28204	1.56494	7.09721	0.00772042	0.024295	NA	NA	NA	NA	NA	NA	NA	NA	NA	NA	NA	NA	NA	NA	NA	NA	NA	NA	NA	NA	NA	NA	NA	NA	NA	NA	NA
308	COL4A4	1.65376	4.35772	9.40814	0.00216024	0.0175927	1.65385	4.35609	9.38059	0.00219295	0.029188	3.27839	3.50414	47.9601	4.35e-12	2.37e-11	3.27826	3.50271	47.9554	4.36034e-12	4.10903e-11	NA	NA	NA	NA	NA	NA	NA	NA	NA	NA	NA	NA	NA	NA	NA	NA	NA	NA	NA	NA	NA	NA	NA	NA	NA	NA	NA
309	EAF1	2.73865	6.94375	50.9961	9.25e-13	1.1e-10	2.73875	6.94213	51.1375	8.61186e-13	1.67796e-10	3.27515	6.99569	619.273	1.08e-136	9.21e-135	3.27502	6.99422	619.212	1.10982e-136	1.64464e-134	NA	NA	NA	NA	NA	NA	NA	NA	NA	NA	NA	NA	NA	NA	NA	NA	NA	NA	NA	NA	NA	NA	NA	NA	NA	NA	NA
310	MOV10L1	4.71806	2.28946	13.6551	0.000219639	0.0029716	4.71813	2.28783	13.6089	0.000225111	0.00496983	3.27199	2.20053	14.9049	0.000113072	0.000286362	3.27187	2.1991	14.9035	0.000113156	0.000495843	NA	NA	NA	NA	NA	NA	NA	NA	NA	NA	NA	NA	NA	NA	NA	NA	NA	NA	NA	NA	NA	NA	NA	NA	NA	NA	NA
311	GRHL1	NA	NA	NA	NA	NA	1.78736	1.47344	1.30035	0.25415	0.73201	3.25547	1.5113	6.51301	0.0107088	0.0188892	3.25538	1.50987	6.51245	0.0107122	0.0327022	NA	NA	NA	NA	NA	NA	NA	NA	NA	NA	NA	NA	NA	NA	NA	NA	NA	NA	NA	NA	NA	NA	NA	NA	NA	NA	NA
312	ZNF878	3.41907	1.67128	4.49517	0.0339907	0.126895	3.41911	1.66964	4.45559	0.0347871	0.210897	3.2516	1.68189	8.17107	0.00425638	0.00815002	3.2515	1.68047	8.17034	0.00425809	0.0141129	NA	NA	NA	NA	NA	NA	NA	NA	NA	NA	NA	NA	NA	NA	NA	NA	NA	NA	NA	NA	NA	NA	NA	NA	NA	NA	NA
313	FAM90A25P	6.5095	2.99933	20.1108	7.31e-06	0.000170896	6.50958	2.9977	20.0196	7.66519e-06	0.000292738	3.2493	3.12742	34.8033	3.65e-09	1.58e-08	3.24917	3.12599	34.7999	3.65388e-09	2.73625e-08	NA	NA	NA	NA	NA	NA	NA	NA	NA	NA	NA	NA	NA	NA	NA	NA	NA	NA	NA	NA	NA	NA	NA	NA	NA	NA	NA
314	ICAM1	-2.23487	5.59281	7.63888	0.00571232	0.0364777	-2.2348	5.59116	7.60932	0.00580674	0.0604547	3.24629	4.6177	111.818	3.92e-26	4.61e-25	3.24616	4.61625	111.807	3.93853e-26	8.0231e-25	NA	NA	NA	NA	NA	NA	NA	NA	NA	NA	NA	NA	4.04105	1.35132	0.3344	4	4.04105	317532	532	4	1.35132	0.3344	4	0.00658997	0.604888	6.66975	2.56236e-11
315	CCNJ	5.0099	7.04064	27.9004	1.28e-07	5.17e-06	5.01	7.03902	27.8555	1.30723e-07	8.65035e-06	3.23906	5.4161	200.001	2.09e-45	4.63e-44	3.23893	5.41465	199.981	2.10851e-45	8.09661e-44	NA	NA	NA	NA	NA	NA	NA	NA	NA	NA	NA	NA	NA	NA	NA	NA	NA	NA	NA	NA	NA	NA	NA	NA	NA	NA	NA
316	SPTY2D1	3.61968	7.33569	53.6187	2.43e-13	3.13e-11	3.61978	7.33407	53.6758	2.36461e-13	5.02611e-11	3.23882	6.97631	603.209	3.36e-133	2.74e-131	3.23868	6.97485	603.148	3.45934e-133	4.88556e-131	NA	NA	NA	NA	NA	NA	NA	NA	3.14129	0.391861	0.124745	3	3.98627	1.89279	0.474827	10	3.6489	2.12069e+06	685	3.76923	1.54285	0.422827	13	-7.41368e-05	0.243625	14.9778	1.02486e-50
317	GRAMD1C	4.37397	4.09608	44.9217	2.05e-11	2.06e-09	4.37407	4.09445	44.6674	2.33515e-11	3.83895e-09	3.2339	4.12364	76.7224	1.97e-18	1.61e-17	3.23377	4.1222	76.7148	1.97522e-18	2.78957e-17	NA	NA	NA	NA	NA	NA	NA	NA	NA	NA	NA	NA	NA	NA	NA	NA	NA	NA	NA	NA	NA	NA	NA	NA	NA	NA	NA
318	TMEM74	3.00076	1.50949	3.07696	0.0794087	0.221801	3.00084	1.50785	3.0564	0.0804196	0.364164	3.22344	1.45636	5.95006	0.0147168	0.025171	3.22335	1.45494	5.94956	0.0147209	0.0435564	NA	NA	NA	NA	NA	NA	NA	NA	NA	NA	NA	NA	NA	NA	NA	NA	NA	NA	NA	NA	NA	NA	NA	NA	NA	NA	NA
319	GUSBP1	3.14566	4.79606	45.4946	1.53e-11	1.57e-09	3.14575	4.79443	45.3491	1.64867e-11	2.77544e-09	3.21771	4.73785	121.005	3.81e-28	4.89e-27	3.21758	4.7364	120.993	3.83468e-28	8.52092e-27	NA	NA	NA	NA	NA	NA	NA	NA	NA	NA	NA	NA	NA	NA	NA	NA	NA	NA	NA	NA	NA	NA	NA	NA	NA	NA	NA
320	ZNF622	3.00208	7.24349	58.829	1.72e-14	2.49e-12	3.00218	7.24187	59.0064	1.5716e-14	3.71587e-12	3.21749	7.39548	800.714	3.77e-176	4.29e-174	3.21736	7.39401	800.634	3.92879e-176	7.72651e-174	1.11676	0	0	1	NA	NA	NA	NA	3.26094	1.81287	0.555933	11	4.00475	1.98095	0.49465	7	3.4296	965868	477	3.38889	1.79305	0.522815	18	-0.00121514	0.189272	18.1264	1.97426e-73
321	PYGM	0.848727	2.46134	0.458036	0.498543	0.689224	0.848772	2.45969	0.451252	0.501741	1	3.21586	1.60101	7.25087	0.00708668	0.0129848	3.21576	1.59958	7.25023	0.00708921	0.0224835	NA	NA	NA	NA	NA	NA	NA	NA	3.15819	0	0	1	NA	NA	NA	NA	3.15819	89825.5	842	3	0	0	1	0.0377565	1.99363	1.5652	0.117536
322	PRAMEF16	NA	NA	NA	NA	NA	2.61739	1.19718	1.70452	0.191697	0.623958	3.21459	1.26434	4.4919	0.0340558	0.0535716	3.21452	1.26292	4.49157	0.0340625	0.092547	NA	NA	NA	NA	NA	NA	NA	NA	NA	NA	NA	NA	NA	NA	NA	NA	NA	NA	NA	NA	NA	NA	NA	NA	NA	NA	NA
323	PITX1	1.96658	1.84735	2.75391	0.0970167	0.253072	1.96667	1.84571	2.74312	0.0976737	0.412468	3.20973	2.0855	12.9067	0.000327404	0.000769153	3.20961	2.08407	12.9055	0.000327618	0.00133167	NA	NA	NA	NA	NA	NA	NA	NA	NA	NA	NA	NA	NA	NA	NA	NA	NA	NA	NA	NA	NA	NA	NA	NA	NA	NA	NA
324	NFYA	3.73834	7.9695	79.1198	5.85e-19	1.32e-16	3.73844	7.96789	79.3769	5.13218e-19	1.89468e-16	3.20044	8.16917	1352.67	4.06e-296	9.49e-294	3.2003	8.1677	1352.53	4.34476e-296	1.75821e-293	NA	NA	NA	NA	NA	NA	NA	NA	2.16231	0.928774	0.429528	2	7.39913	0.161395	0.0218128	2	5.16441	1.34856e+06	347	3.5	4.69173	0.908474	4	0.0287035	0.596233	8.61359	7.08099e-18
325	RP11-321C1.1	NA	NA	NA	NA	NA	2.17216	1.25347	1.26396	0.260902	0.743622	3.19225	1.9349	10.8499	0.000987999	0.00213648	3.19214	1.93347	10.8489	0.000988542	0.00369877	NA	NA	NA	NA	NA	NA	NA	NA	NA	NA	NA	NA	NA	NA	NA	NA	NA	NA	NA	NA	NA	NA	NA	NA	NA	NA	NA
326	MYLIP	3.04697	4.99172	35.1774	3.01e-09	1.89e-07	3.04706	4.9901	35.0423	3.22627e-09	3.31172e-07	3.18155	5.20187	167.774	2.27e-38	4.08e-37	3.18142	5.20041	167.757	2.28577e-38	7.11531e-37	NA	NA	NA	NA	NA	NA	NA	NA	NA	NA	NA	NA	NA	NA	NA	NA	NA	NA	NA	NA	NA	NA	NA	NA	NA	NA	NA
327	ZNF365	2.5992	4.08367	18.3327	1.85e-05	0.000378667	2.5993	4.08205	18.2294	1.95832e-05	0.000648959	3.18073	4.56382	104.909	1.28e-24	1.41e-23	3.1806	4.56237	104.898	1.28581e-24	2.46198e-23	NA	NA	NA	NA	NA	NA	NA	NA	NA	NA	NA	NA	NA	NA	NA	NA	NA	NA	NA	NA	NA	NA	NA	NA	NA	NA	NA
328	SLC16A10	1.74647	1.72923	1.66798	0.19653	0.396918	1.74669	1.72759	1.64861	0.199149	0.638741	3.16135	1.29891	4.60123	0.0319491	0.050618	3.16127	1.29748	4.60086	0.0319559	0.0874877	NA	NA	NA	NA	NA	NA	NA	NA	NA	NA	NA	NA	NA	NA	NA	NA	NA	NA	NA	NA	NA	NA	NA	NA	NA	NA	NA
329	MED26	2.69662	5.70549	39.085	4.06e-10	3.2e-08	2.69672	5.70387	38.9913	4.25708e-10	5.4623e-08	3.15971	5.68296	235.424	3.91e-53	1.03e-51	3.15958	5.6815	235.4	3.96087e-53	1.808e-51	NA	NA	NA	NA	NA	NA	NA	NA	NA	NA	NA	NA	NA	NA	NA	NA	NA	NA	NA	NA	NA	NA	NA	NA	NA	NA	NA
330	SOBP	0.828306	2.27824	0.823312	0.364214	0.572562	0.828355	2.2766	0.814482	0.366799	0.894159	3.15282	1.71642	8.22114	0.00414052	0.00794821	3.15272	1.71499	8.22038	0.00414225	0.0137637	NA	NA	NA	NA	NA	NA	NA	NA	NA	NA	NA	NA	NA	NA	NA	NA	NA	NA	NA	NA	NA	NA	NA	NA	NA	NA	NA
331	GPRIN3	3.81225	1.82151	5.78352	0.0161771	0.0762101	3.8121	1.81987	5.73358	0.0166435	0.127403	3.15148	1.85661	9.75192	0.00179136	0.00368988	3.15137	1.85518	9.751	0.00179225	0.00639009	NA	NA	NA	NA	NA	NA	NA	NA	NA	NA	NA	NA	NA	NA	NA	NA	NA	NA	NA	NA	NA	NA	NA	NA	NA	NA	NA
332	ARHGAP42	2.04964	4.75037	14.5654	0.000135379	0.00201285	2.04973	4.74874	14.5143	0.0001391	0.0033761	3.14705	4.41271	92.5368	6.61e-22	6.65e-21	3.14692	4.41126	92.5274	6.63988e-22	1.15665e-20	NA	NA	NA	NA	NA	NA	NA	NA	NA	NA	NA	NA	NA	NA	NA	NA	NA	NA	NA	NA	NA	NA	NA	NA	NA	NA	NA
333	DIRAS3	1.56723	1.71155	1.48778	0.222562	0.427247	1.5674	1.7099	1.47781	0.224118	0.683297	3.14265	2.01168	11.6081	0.000656644	0.00146854	3.14254	2.01025	11.607	0.000657036	0.00254201	NA	NA	NA	NA	NA	NA	NA	NA	NA	NA	NA	NA	NA	NA	NA	NA	NA	NA	NA	NA	NA	NA	NA	NA	NA	NA	NA
334	CLDN14	3.04637	1.79246	4.80484	0.0283798	0.112617	3.04643	1.79082	4.78428	0.0287206	0.185845	3.12852	1.68121	7.78429	0.00527026	0.00991948	3.12841	1.67979	7.78357	0.00527234	0.0171769	NA	NA	NA	NA	NA	NA	NA	NA	NA	NA	NA	NA	NA	NA	NA	NA	NA	NA	NA	NA	NA	NA	NA	NA	NA	NA	NA
335	MPZL3	3.61693	1.94848	7.04969	0.00792789	0.0457427	3.61694	1.94684	7.01616	0.00807774	0.0758839	3.12307	1.96913	10.9846	0.000918717	0.00199839	3.12295	1.9677	10.9836	0.000919237	0.003461	NA	NA	NA	NA	NA	NA	NA	NA	NA	NA	NA	NA	NA	NA	NA	NA	NA	NA	NA	NA	NA	NA	NA	NA	NA	NA	NA
336	HAND2	1.80085	1.7155	1.96687	0.16078	0.348963	1.80086	1.71386	1.95767	0.161763	0.562826	3.11967	1.49355	6.01493	0.0141853	0.0243603	3.11957	1.49212	6.01441	0.0141896	0.042156	NA	NA	NA	NA	NA	NA	NA	NA	0.604072	0	0	1	NA	NA	NA	NA	0.604072	1.19571e+06	217	3	0	0	1	0.0275567	2.09285	0.275469	0.782956
337	DSP	2.1398	7.08086	6.47235	0.0109566	0.0573747	2.13985	7.07925	6.45924	0.0110377	0.0945321	3.10904	8.31615	1221.22	1.49e-267	3.18e-265	3.10891	8.31468	1215.86	2.1762e-266	7.89546e-264	-0.907498	1.36284	-1.50175	9	-2.36162	4.29254	-1.81762	18	-1.53399	4.15585	-2.70918	29	2.99246	2.54704	0.851154	38	1.45456	452218	2871	3.56716	4.2174	2.89944	67	-0.00415011	0.0997294	14.6267	1.89904e-48
338	C4orf32	2.59678	2.92351	12.09	0.000506929	0.00581856	2.59688	2.92187	12.0179	0.000526918	0.00986471	3.0999	3.91482	62.1619	3.16e-15	2.13e-14	3.09977	3.91338	62.1555	3.17374e-15	3.7041e-14	NA	NA	NA	NA	NA	NA	NA	NA	4.41065	1.10423	0.250355	2	6.65857	0	0	1	5.51488	558240	132	3.33333	1.67607	0.303919	3	-0.00155615	0.628423	8.77822	1.66087e-18
339	HIST2H2AA4	0.436794	5.36501	0.490959	0.4835	0.677374	0.436875	5.36337	0.489014	0.484367	1	3.09744	5.23557	166.609	4.07e-38	7.25e-37	3.0973	5.23412	166.591	4.10854e-38	1.26583e-36	NA	NA	NA	NA	NA	NA	NA	NA	NA	NA	NA	NA	NA	NA	NA	NA	NA	NA	NA	NA	NA	NA	NA	NA	NA	NA	NA
340	COL4A3	1.44418	2.09934	2.06749	0.150469	0.335006	1.44422	2.0977	2.05015	0.152191	0.542806	3.09707	1.63823	7.26735	0.00702193	0.0128755	3.09697	1.63681	7.26668	0.00702454	0.0223019	NA	NA	NA	NA	NA	NA	NA	NA	NA	NA	NA	NA	NA	NA	NA	NA	NA	NA	NA	NA	NA	NA	NA	NA	NA	NA	NA
341	SAMD8	2.46025	5.96914	43.3567	4.56e-11	4.22e-09	2.46035	5.96752	43.4034	4.45411e-11	6.74301e-09	3.09178	5.90636	269.074	1.81e-60	5.45e-59	3.09165	5.9049	269.046	1.83186e-60	9.54154e-59	NA	NA	NA	NA	NA	NA	NA	NA	NA	NA	NA	NA	NA	NA	NA	NA	NA	NA	NA	NA	NA	NA	NA	NA	NA	NA	NA
342	AMDHD1	2.53141	3.14904	13.5892	0.000227487	0.00304128	2.53154	3.1474	13.4934	0.000239407	0.00519365	3.08892	2.84801	25.7631	3.86e-07	1.35e-06	3.0888	2.84657	25.7605	3.86516e-07	2.34596e-06	NA	NA	NA	NA	NA	NA	NA	NA	NA	NA	NA	NA	NA	NA	NA	NA	NA	NA	NA	NA	NA	NA	NA	NA	NA	NA	NA
343	STX3	1.54745	5.72769	6.60486	0.0101701	0.0544082	1.54753	5.72607	6.58313	0.010295	0.0898908	3.08401	5.70027	231.599	2.67e-52	6.88e-51	3.08388	5.69881	231.575	2.70312e-52	1.20512e-50	NA	NA	NA	NA	NA	NA	NA	NA	-0.823999	0	0	1	0.553909	0	0	1	-0.135045	126712	289	3.5	0.688954	-5.10167	2	0.0596023	1.47227	-0.132209	0.894819
344	C21orf91	2.74445	6.50634	25.9231	3.55e-07	1.21e-05	2.74456	6.50472	25.9158	3.56647e-07	1.98019e-05	3.08108	6.2491	341.624	2.83e-76	1.09e-74	3.08094	6.24764	341.588	2.87717e-76	1.93432e-74	NA	NA	NA	NA	NA	NA	NA	NA	NA	NA	NA	NA	NA	NA	NA	NA	NA	NA	NA	NA	NA	NA	NA	NA	NA	NA	NA
345	PPFIBP2	4.51423	2.4356	9.57856	0.00196863	0.0164406	4.51438	2.43396	9.49998	0.00205475	0.0278955	3.07329	3.07656	31.221	2.3e-08	9.19e-08	3.07317	3.07512	31.2178	2.30644e-08	1.59391e-07	NA	NA	NA	NA	NA	NA	NA	NA	NA	NA	NA	NA	NA	NA	NA	NA	NA	NA	NA	NA	NA	NA	NA	NA	NA	NA	NA
346	SOCS2	-0.2084	3.64681	0.0654493	0.798082	0.889439	-0.208287	3.64516	0.0650609	0.798669	1	3.06804	2.47172	18.0808	2.12e-05	5.96e-05	3.06792	2.47029	18.079	2.11931e-05	0.000103185	NA	NA	NA	NA	NA	NA	NA	NA	NA	NA	NA	NA	NA	NA	NA	NA	NA	NA	NA	NA	NA	NA	NA	NA	NA	NA	NA
347	MYLK3	3.89403	1.9847	6.52001	0.0106667	0.0562384	3.89428	1.98306	6.45936	0.011037	0.0945321	3.0608	1.61503	6.94151	0.00842178	0.0151992	3.06069	1.61361	6.94088	0.00842479	0.0263146	NA	NA	NA	NA	NA	NA	NA	NA	NA	NA	NA	NA	NA	NA	NA	NA	NA	NA	NA	NA	NA	NA	NA	NA	NA	NA	NA
348	PCSK9	5.32925	2.72084	16.3702	5.21e-05	0.000905435	5.32937	2.71921	16.2718	5.48751e-05	0.00154237	3.06006	2.37104	16.3429	5.29e-05	0.000141073	3.05994	2.36961	16.3412	5.28999e-05	0.000244331	NA	NA	NA	NA	NA	NA	NA	NA	NA	NA	NA	NA	NA	NA	NA	NA	NA	NA	NA	NA	NA	NA	NA	NA	NA	NA	NA
349	LBH	1.30609	7.10988	5.16314	0.0230711	0.0984138	1.30622	7.10825	5.16073	0.0231032	0.161131	3.05247	7.00309	573.115	1.18e-126	8.48e-125	3.05234	7.00162	573.056	1.21523e-126	1.52215e-124	NA	NA	NA	NA	NA	NA	NA	NA	NA	NA	NA	NA	NA	NA	NA	NA	NA	NA	NA	NA	NA	NA	NA	NA	NA	NA	NA
350	SDC2	3.03617	6.62462	60.3558	7.92e-15	1.17e-12	3.03627	6.62301	60.5067	7.33295e-15	1.77365e-12	3.04798	6.75006	479.449	2.82e-106	1.59e-104	3.04785	6.7486	479.399	2.88721e-106	2.81276e-104	NA	NA	NA	NA	NA	NA	NA	NA	NA	NA	NA	NA	NA	NA	NA	NA	NA	NA	NA	NA	NA	NA	NA	NA	NA	NA	NA
351	WDR47	2.90873	6.78192	40.1371	2.37e-10	1.95e-08	2.90883	6.7803	40.1743	2.3228e-10	3.11329e-08	3.04626	7.23375	670.949	6.21e-148	5.99e-146	3.04613	7.23229	670.879	6.43263e-148	1.0743e-145	NA	NA	NA	NA	NA	NA	NA	NA	NA	NA	NA	NA	3.1715	1.71281	0.540064	2	3.1715	210461	927	4	1.71281	0.540064	2	0.168567	1.39476	2.15301	0.0313182
352	PABPN1	3.22959	9.4473	52.2341	4.93e-13	6.03e-11	3.22968	9.4457	52.3578	4.62549e-13	9.26992e-11	3.02831	8.94438	1811.18	0	0	3.02817	8.94291	1811.63	0	0	NA	NA	NA	NA	NA	NA	NA	NA	0.57188	1.19987	2.09812	10	0.208969	3.49712	16.7351	14	0.378741	996884	306	3.58333	3.20098	8.45163	24	0.0008602	0.164082	2.303	0.0212789
353	RASL11A	1.66282	3.05307	3.38674	0.0657226	0.195752	1.66284	3.05142	3.34874	0.0672564	0.323539	3.01823	3.09346	30.9811	2.61e-08	1.03e-07	3.0181	3.09202	30.9779	2.60978e-08	1.79326e-07	NA	NA	NA	NA	NA	NA	NA	NA	NA	NA	NA	NA	NA	NA	NA	NA	NA	NA	NA	NA	NA	NA	NA	NA	NA	NA	NA
354	EAF2	3.19331	2.19703	8.26869	0.00403346	0.0284653	3.19341	2.19539	8.22794	0.00412503	0.0474592	3.00767	2.12436	12.4289	0.000422744	0.000975225	3.00755	2.12293	12.4276	0.000423024	0.00168913	NA	NA	NA	NA	NA	NA	NA	NA	NA	NA	NA	NA	NA	NA	NA	NA	NA	NA	NA	NA	NA	NA	NA	NA	NA	NA	NA
355	COL21A1	1.26536	3.07558	0.994295	0.318695	0.5312	1.26546	3.07394	0.986814	0.320522	0.834886	3.00335	2.23985	13.9982	0.00018299	0.000448164	3.00323	2.23842	13.9968	0.000183126	0.000776295	NA	NA	NA	NA	NA	NA	NA	NA	NA	NA	NA	NA	4.85052	0	0	1	4.85052	213045	957	4	0	0	1	0.110879	2.0321	2.33238	0.0196805
356	ARHGAP26	2.12632	4.69645	7.47256	0.00626464	0.0389979	2.12642	4.69482	7.44277	0.00636918	0.0647472	2.99354	4.32394	81.4909	1.76e-19	1.54e-18	2.9934	4.3225	81.4824	1.76832e-19	2.67703e-18	NA	NA	NA	NA	NA	NA	NA	NA	NA	NA	NA	NA	NA	NA	NA	NA	NA	NA	NA	NA	NA	NA	NA	NA	NA	NA	NA
357	KIAA0922	2.63981	4.85842	19.6993	9.06e-06	0.000205587	2.63991	4.85679	19.6212	9.44155e-06	0.000350403	2.9835	5.18143	153.028	3.78e-35	6.08e-34	2.98337	5.17998	153.012	3.80744e-35	1.06119e-33	NA	NA	NA	NA	NA	NA	NA	NA	NA	NA	NA	NA	NA	NA	NA	NA	NA	NA	NA	NA	NA	NA	NA	NA	NA	NA	NA
358	SLIT2	3.52757	5.46886	4.18339	0.0408221	0.143918	3.5277	5.46723	4.17014	0.0411424	0.236166	2.98345	6.94291	534.364	3.17e-118	2.06e-116	2.98332	6.94144	534.307	3.26529e-118	3.67441e-116	NA	NA	NA	NA	NA	NA	NA	NA	NA	NA	NA	NA	NA	NA	NA	NA	NA	NA	NA	NA	NA	NA	NA	NA	NA	NA	NA
359	TLL1	3.40021	2.50694	6.59369	0.0102341	0.0545463	3.40031	2.5053	6.53472	0.0105789	0.0915344	2.98073	1.76968	8.18727	0.00421853	0.0080839	2.98062	1.76825	8.18648	0.00422037	0.0139989	NA	NA	NA	NA	NA	NA	NA	NA	NA	NA	NA	NA	NA	NA	NA	NA	NA	NA	NA	NA	NA	NA	NA	NA	NA	NA	NA
360	CCL26	NA	NA	NA	NA	NA	1.6077	1.43459	1.01934	0.312675	0.822349	2.97804	1.62642	6.80292	0.00910087	0.016323	2.97794	1.625	6.80228	0.00910414	0.0282527	NA	NA	NA	NA	NA	NA	NA	NA	NA	NA	NA	NA	NA	NA	NA	NA	NA	NA	NA	NA	NA	NA	NA	NA	NA	NA	NA
361	PPP1R15A	1.989	7.87673	13.7054	0.00021384	0.00290795	1.98907	7.87511	13.7052	0.000213864	0.00475793	2.97312	7.92349	1012.02	4.38e-222	6.83e-220	2.97299	7.92202	1009.53	1.5221e-221	4.05437e-219	NA	NA	NA	NA	NA	NA	NA	NA	NA	NA	NA	NA	NA	NA	NA	NA	NA	NA	NA	NA	NA	NA	NA	NA	NA	NA	NA
362	PRSS35	2.78198	1.41913	2.42898	0.119111	0.288219	2.78203	1.41748	2.41559	0.120132	0.468138	2.97284	1.30828	4.273	0.0387226	0.0600808	2.97276	1.30685	4.27264	0.0387308	0.103757	NA	NA	NA	NA	-11.7252	0	0	1	NA	NA	NA	NA	NA	NA	NA	NA	NA	NA	NA	NA	NA	NA	NA	NA	NA	NA	NA
363	ELOVL4	2.94893	5.00819	44.7126	2.28e-11	2.27e-09	2.94902	5.00657	44.5009	2.54234e-11	4.08386e-09	2.97224	5.33394	170.129	6.94e-39	1.27e-37	2.97211	5.33249	170.111	6.99829e-39	2.22119e-37	NA	NA	NA	NA	NA	NA	NA	NA	NA	NA	NA	NA	NA	NA	NA	NA	NA	NA	NA	NA	NA	NA	NA	NA	NA	NA	NA
364	FAM107B	3.08071	5.30979	31.4799	2.02e-08	1.01e-06	3.08081	5.30816	31.3403	2.16538e-08	1.75931e-06	2.96445	6.0076	274.658	1.1e-61	3.39e-60	2.96432	6.00614	274.629	1.11191e-61	5.93858e-60	NA	NA	NA	NA	NA	NA	NA	NA	NA	NA	NA	NA	NA	NA	NA	NA	NA	NA	NA	NA	NA	NA	NA	NA	NA	NA	NA
365	ANXA3	NA	NA	NA	NA	NA	2.60409	1.38442	2.08296	0.148951	0.5357	2.9538	1.59503	6.45205	0.0110825	0.0194974	2.9537	1.5936	6.45144	0.0110863	0.0337561	NA	NA	NA	NA	NA	NA	NA	NA	NA	NA	NA	NA	NA	NA	NA	NA	NA	NA	NA	NA	NA	NA	NA	NA	NA	NA	NA
366	BZW2	3.87886	7.37765	27.7765	1.36e-07	5.4e-06	3.87899	7.37603	27.7403	1.38739e-07	9.01073e-06	2.94762	7.57555	815.706	2.08e-179	2.43e-177	2.94748	7.57408	815.619	2.16878e-179	4.43085e-177	NA	NA	NA	NA	1.20565	0.139267	0.115511	2	0.574259	0.422253	0.735301	17	0.651069	0.752752	1.15618	22	0.649693	478756	419	3.5641	0.581382	0.894856	39	-0.00181692	0.125793	5.17921	2.22833e-07
367	VGLL2	3.01559	4.53397	30.8275	2.82e-08	1.35e-06	3.01568	4.53234	30.7559	2.92616e-08	2.26921e-06	2.94438	4.49626	90.8827	1.52e-21	1.5e-20	2.94425	4.49481	90.873	1.53192e-21	2.61658e-20	NA	NA	NA	NA	NA	NA	NA	NA	NA	NA	NA	NA	NA	NA	NA	NA	NA	NA	NA	NA	NA	NA	NA	NA	NA	NA	NA
368	DNM3	3.94554	3.38296	28.0008	1.21e-07	4.97e-06	3.94564	3.38133	27.786	1.355e-07	8.88264e-06	2.94033	3.39007	38.3947	5.78e-10	2.67e-09	2.9402	3.38863	38.3907	5.79092e-10	4.63516e-09	NA	NA	NA	NA	NA	NA	NA	NA	NA	NA	NA	NA	NA	NA	NA	NA	NA	NA	NA	NA	NA	NA	NA	NA	NA	NA	NA
369	CCNE1	3.10247	3.94952	29.3877	5.93e-08	2.62e-06	3.10258	3.94789	29.1882	6.56795e-08	4.71704e-06	2.93739	4.58529	96.8521	7.47e-23	7.81e-22	2.93726	4.58384	96.8418	7.50958e-23	1.35876e-21	NA	NA	NA	NA	NA	NA	NA	NA	-0.635814	0	0	1	NA	NA	NA	NA	-0.635814	777643	410	3	0	0	1	0.0860778	1.90861	-0.378228	0.705261
370	DNER	-2.00723	3.91055	5.3955	0.0201887	0.0892565	-2.00717	3.90891	5.36711	0.0205199	0.147779	2.93666	1.51781	5.75059	0.0164831	0.0278887	2.93656	1.51639	5.75006	0.0164881	0.0482693	NA	NA	NA	NA	NA	NA	NA	NA	NA	NA	NA	NA	NA	NA	NA	NA	NA	NA	NA	NA	NA	NA	NA	NA	NA	NA	NA
371	TNIK	1.51391	3.43285	4.61118	0.0317643	0.121583	1.51405	3.43121	4.58592	0.0322356	0.200572	2.92658	2.61576	19.5339	9.88e-06	2.92e-05	2.92646	2.61433	19.5319	9.89332e-06	5.05304e-05	NA	NA	NA	NA	NA	NA	NA	NA	NA	NA	NA	NA	NA	NA	NA	NA	NA	NA	NA	NA	NA	NA	NA	NA	NA	NA	NA
372	AOC2	0.544384	1.75466	0.227776	0.633178	0.787644	0.544466	1.75302	0.226793	0.633912	1	2.92569	1.62419	6.62648	0.0100474	0.0178286	2.92559	1.62277	6.62585	0.0100509	0.0308717	NA	NA	NA	NA	NA	NA	NA	NA	NA	NA	NA	NA	NA	NA	NA	NA	NA	NA	NA	NA	NA	NA	NA	NA	NA	NA	NA
373	MAP2	2.20552	6.00043	34.6788	3.89e-09	2.35e-07	2.20562	5.9988	34.7261	3.79511e-09	3.77848e-07	2.92062	3.90996	57.5625	3.27e-14	2.07e-13	2.92049	3.90852	57.5564	3.28429e-14	3.5902e-13	NA	NA	NA	NA	NA	NA	NA	NA	NA	NA	NA	NA	NA	NA	NA	NA	NA	NA	NA	NA	NA	NA	NA	NA	NA	NA	NA
374	RND3	1.24859	8.19771	6.95593	0.00835418	0.0473036	1.24867	8.19608	6.96257	0.00832324	0.0774982	2.91116	8.43427	1442.43	1.26626044825136e-315	3.20654078092004e-313	2.91102	8.43281	1442.27	1.3684926846118e-315	5.99941490881683e-313	NA	NA	NA	NA	4.28168	0	0	1	7.21489	3.17153	0.439582	9	5.27482	3.58289	0.679244	2	7.21489	600717	244	3.18182	4.00066	0.554501	11	-0.00334428	0.243244	29.6749	1.61948e-193
375	C1orf115	2.32558	1.96786	3.2412	0.0718081	0.208193	2.32579	1.96621	3.20467	0.0734282	0.343825	2.90932	1.7971	8.20679	0.0041734	0.00800374	2.9092	1.79567	8.20598	0.00417527	0.0138624	NA	NA	NA	NA	NA	NA	NA	NA	NA	NA	NA	NA	NA	NA	NA	NA	NA	NA	NA	NA	NA	NA	NA	NA	NA	NA	NA
376	LRRC70	NA	NA	NA	NA	NA	2.91168	1.43559	2.64973	0.103567	0.42744	2.90742	1.33134	4.2907	0.0383214	0.0595191	2.90733	1.32992	4.29033	0.0383298	0.102794	NA	NA	NA	NA	NA	NA	NA	NA	NA	NA	NA	NA	NA	NA	NA	NA	NA	NA	NA	NA	NA	NA	NA	NA	NA	NA	NA
377	TESK2	3.11694	4.26166	36.4504	1.57e-09	1.03e-07	3.11703	4.26003	36.287	1.70299e-09	1.83774e-07	2.90498	4.45781	86.8197	1.19e-20	1.11e-19	2.90485	4.45636	86.8104	1.1944e-20	1.92597e-19	NA	NA	NA	NA	NA	NA	NA	NA	NA	NA	NA	NA	NA	NA	NA	NA	NA	NA	NA	NA	NA	NA	NA	NA	NA	NA	NA
378	MYH3	1.91521	4.15072	14.139	0.000169789	0.00241287	1.91529	4.14909	14.0455	0.000178443	0.00413088	2.90287	2.3568	15.0869	0.000102675	0.000261803	2.90275	2.35538	15.0853	0.00010276	0.000453519	NA	NA	NA	NA	NA	NA	NA	NA	NA	NA	NA	NA	NA	NA	NA	NA	NA	NA	NA	NA	NA	NA	NA	NA	NA	NA	NA
379	TBX20	2.01561	1.84081	1.51948	0.217699	0.420899	2.01574	1.83916	1.49517	0.221416	0.677612	2.90155	3.71671	49.0725	2.47e-12	1.37e-11	2.90142	3.71527	49.0673	2.47333e-12	2.38089e-11	NA	NA	NA	NA	NA	NA	NA	NA	NA	NA	NA	NA	NA	NA	NA	NA	NA	NA	NA	NA	NA	NA	NA	NA	NA	NA	NA
380	METTL21D	3.22806	4.81411	46.2046	1.07e-11	1.11e-09	3.22815	4.81248	46.0644	1.14429e-11	1.95767e-09	2.89873	4.68437	102.507	4.3e-24	4.68e-23	2.8986	4.68292	102.496	4.3227e-24	8.15076e-23	NA	NA	NA	NA	NA	NA	NA	NA	NA	NA	NA	NA	NA	NA	NA	NA	NA	NA	NA	NA	NA	NA	NA	NA	NA	NA	NA
381	ALG11	4.58712	4.32379	44.2656	2.87e-11	2.75e-09	4.58722	4.32217	44.1396	3.05778e-11	4.80186e-09	2.89459	4.1206	66.9514	2.78e-16	2e-15	2.89446	4.11916	66.9442	2.79302e-16	3.46951e-15	NA	NA	NA	NA	NA	NA	NA	NA	1.51788	0	0	1	2.53176	0.132611	0.0523789	2	2.39915	210959	492	3.66667	0.573244	0.238936	3	0.0252963	0.688688	3.44692	0.000567016
382	CNTD2	2.67435	1.51699	2.64055	0.104167	0.264627	2.67433	1.51535	2.62173	0.105409	0.431626	2.89382	1.52008	5.6564	0.0173918	0.029251	2.89371	1.51866	5.65587	0.017397	0.0506203	NA	NA	NA	NA	NA	NA	NA	NA	NA	NA	NA	NA	NA	NA	NA	NA	NA	NA	NA	NA	NA	NA	NA	NA	NA	NA	NA
383	AC125232.1	1.09892	4.01332	5.60141	0.017946	0.0816884	1.09899	4.01168	5.56073	0.0183678	0.136096	2.89151	4.63941	98.8456	2.73e-23	2.89e-22	2.89138	4.63796	98.8349	2.74455e-23	5.02642e-22	NA	NA	NA	NA	NA	NA	NA	NA	NA	NA	NA	NA	NA	NA	NA	NA	NA	NA	NA	NA	NA	NA	NA	NA	NA	NA	NA
384	RBM47	0.816469	1.89314	0.589221	0.442721	0.642282	0.816511	1.89149	0.586072	0.443942	0.985512	2.86715	1.55558	5.87289	0.0153758	0.0261864	2.86704	1.55415	5.87233	0.0153807	0.0453235	NA	NA	NA	NA	NA	NA	NA	NA	NA	NA	NA	NA	NA	NA	NA	NA	NA	NA	NA	NA	NA	NA	NA	NA	NA	NA	NA
385	ZNF14	2.52126	4.32091	26.4058	2.77e-07	9.78e-06	2.52136	4.31928	26.3159	2.89895e-07	1.65768e-05	2.86641	4.13842	67.0363	2.67e-16	1.91e-15	2.86628	4.13697	67.0291	2.67535e-16	3.32727e-15	NA	NA	NA	NA	NA	NA	NA	NA	NA	NA	NA	NA	NA	NA	NA	NA	NA	NA	NA	NA	NA	NA	NA	NA	NA	NA	NA
386	RP11-212D19.4	2.00721	2.00287	3.46451	0.0626993	0.189478	2.00731	2.00123	3.449	0.0632901	0.310491	2.86616	1.79886	8.06546	0.0045117	0.00859826	2.86604	1.79744	8.06466	0.00451371	0.0148898	NA	NA	NA	NA	NA	NA	NA	NA	NA	NA	NA	NA	NA	NA	NA	NA	NA	NA	NA	NA	NA	NA	NA	NA	NA	NA	NA
387	RAB38	2.5309	1.68245	3.11662	0.0774974	0.218334	2.53109	1.68081	3.09824	0.0783769	0.357607	2.86001	1.50793	5.47118	0.0193325	0.0321592	2.85991	1.50651	5.47066	0.0193383	0.0556531	NA	NA	NA	NA	NA	NA	NA	NA	NA	NA	NA	NA	NA	NA	NA	NA	NA	NA	NA	NA	NA	NA	NA	NA	NA	NA	NA
388	FBXO6	0.427953	3.4977	0.713634	0.39824	0.604196	0.428025	3.49606	0.708074	0.400084	0.935547	2.85711	3.11135	29.3643	6e-08	2.28e-07	2.85698	3.10991	29.3611	6.00704e-08	3.96009e-07	NA	NA	NA	NA	NA	NA	NA	NA	NA	NA	NA	NA	NA	NA	NA	NA	NA	NA	NA	NA	NA	NA	NA	NA	NA	NA	NA
389	CMYA5	0.790729	2.4748	0.331186	0.564962	0.739001	0.790843	2.47315	0.327723	0.567003	1	2.84267	1.73137	7.33389	0.00676663	0.0124562	2.84256	1.72995	7.33316	0.00676938	0.02157	NA	NA	NA	NA	NA	NA	NA	NA	NA	NA	NA	NA	NA	NA	NA	NA	NA	NA	NA	NA	NA	NA	NA	NA	NA	NA	NA
390	ARHGAP20	3.5647	3.59592	7.3059	0.00687285	0.0415961	3.5648	3.5943	7.27585	0.00698876	0.068926	2.83597	1.32531	4.1018	0.0428375	0.0657106	2.83588	1.32388	4.10144	0.0428467	0.113369	NA	NA	NA	NA	NA	NA	NA	NA	NA	NA	NA	NA	NA	NA	NA	NA	NA	NA	NA	NA	NA	NA	NA	NA	NA	NA	NA
391	SRRT	3.56832	8.6845	74.1658	7.18e-18	1.4e-15	3.56843	8.68289	74.43	6.28264e-18	2.03393e-15	2.83281	8.53985	1245.89	6.5e-273	1.41e-270	2.83267	8.53838	1241.87	4.85632e-272	1.82485e-269	-0.0282824	0.796453	-28.1607	8	0.315352	1.02776	3.2591	12	0.572174	0.893046	1.56079	39	0.715635	1.89288	2.64504	58	0.612433	989343	876	3.59794	1.59479	2.60402	97	-0.000569247	0.0813981	7.53092	5.03842e-14
392	BMP2	1.70546	3.01535	2.87079	0.0902005	0.241731	1.70555	3.01371	2.85174	0.0912751	0.395044	2.83266	2.68947	20.0495	7.55e-06	2.26e-05	2.83253	2.68804	20.0473	7.55493e-06	3.92539e-05	NA	NA	NA	NA	NA	NA	NA	NA	NA	NA	NA	NA	NA	NA	NA	NA	NA	NA	NA	NA	NA	NA	NA	NA	NA	NA	NA
393	RDH10	1.47886	2.59279	3.82664	0.0504439	0.165415	1.479	2.59115	3.80298	0.0511614	0.272851	2.82985	2.86521	23.446	1.28e-06	4.26e-06	2.82972	2.86377	23.4434	1.28641e-06	7.372e-06	NA	NA	NA	NA	NA	NA	NA	NA	NA	NA	NA	NA	NA	NA	NA	NA	NA	NA	NA	NA	NA	NA	NA	NA	NA	NA	NA
394	AGPAT9	2.76703	2.00957	5.54772	0.0185048	0.0837109	2.76715	2.00793	5.52373	0.0187603	0.138419	2.82049	2.13293	11.5522	0.0006767	0.00150812	2.82037	2.1315	11.551	0.000677139	0.00261211	NA	NA	NA	NA	NA	NA	NA	NA	NA	NA	NA	NA	NA	NA	NA	NA	NA	NA	NA	NA	NA	NA	NA	NA	NA	NA	NA
395	HIST1H2BJ	0.635401	2.68459	0.816278	0.366271	0.574884	0.635573	2.68295	0.810737	0.367902	0.896142	2.8127	3.54571	41.1624	1.4e-10	6.84e-10	2.81257	3.54428	41.1579	1.40415e-10	1.18665e-09	NA	NA	NA	NA	NA	NA	NA	NA	0.0265339	0.540183	20.3583	20	-0.39065	0.415501	-1.06361	26	-0.314295	1.88594e+06	126	3.56522	0.663236	-2.11023	46	-0.0054708	0.116714	-2.646	0.00814498
396	LMO4	1.78351	5.77448	16.9766	3.78e-05	0.000694391	1.78361	5.77285	16.9395	3.859e-05	0.00116007	2.80355	5.92571	241.431	1.92e-54	5.19e-53	2.80342	5.92425	241.404	1.94353e-54	9.10861e-53	NA	NA	NA	NA	NA	NA	NA	NA	NA	NA	NA	NA	NA	NA	NA	NA	NA	NA	NA	NA	NA	NA	NA	NA	NA	NA	NA
397	FAM46B	0.101357	2.9182	0.0159148	0.89961	0.948045	0.101419	2.91655	0.0158034	0.89996	1	2.8011	3.26178	32.473	1.21e-08	4.96e-08	2.80097	3.26034	32.4694	1.21083e-08	8.60504e-08	NA	NA	NA	NA	NA	NA	NA	NA	NA	NA	NA	NA	NA	NA	NA	NA	NA	NA	NA	NA	NA	NA	NA	NA	NA	NA	NA
398	AMACR	2.94804	6.09094	53.0432	3.26e-13	4.07e-11	2.94814	6.08932	53.1369	3.11097e-13	6.35575e-11	2.79571	5.53182	181.491	2.29e-41	4.49e-40	2.79558	5.53036	181.471	2.31303e-41	7.85051e-40	NA	NA	NA	NA	NA	NA	NA	NA	NA	NA	NA	NA	NA	NA	NA	NA	NA	NA	NA	NA	NA	NA	NA	NA	NA	NA	NA
399	RFK	2.76638	6.32898	48.8288	2.79e-12	3.15e-10	2.76649	6.32736	48.9353	2.64542e-12	4.97032e-10	2.79354	6.53224	368.787	3.44e-82	1.45e-80	2.79341	6.53079	368.746	3.50973e-82	2.56442e-80	NA	NA	NA	NA	2.69804	0	0	1	2.29823	0	0	1	0.152058	0	0	1	1.22514	1.13855e+06	155	3.5	1.07308	0.875885	2	0.0511873	1.45154	0.808766	0.41865
400	SIRT1	2.42065	6.53218	22.8676	1.74e-06	4.95e-05	2.42076	6.53056	22.8678	1.73532e-06	8.11474e-05	2.79102	7.03784	524.394	4.68e-116	2.95e-114	2.79089	7.03638	524.335	4.82345e-116	5.25906e-114	NA	NA	NA	NA	NA	NA	NA	NA	NA	NA	NA	NA	NA	NA	NA	NA	NA	NA	NA	NA	NA	NA	NA	NA	NA	NA	NA
401	LRRC4	1.52799	1.98845	2.10568	0.146753	0.329849	1.52806	1.98681	2.09381	0.147897	0.53337	2.7883	1.71946	7.03998	0.00797101	0.0144544	2.78819	1.71803	7.03926	0.00797418	0.0250299	NA	NA	NA	NA	NA	NA	NA	NA	NA	NA	NA	NA	NA	NA	NA	NA	NA	NA	NA	NA	NA	NA	NA	NA	NA	NA	NA
402	CTR9	3.00869	8.29859	55.3295	1.02e-13	1.38e-11	3.00879	8.29698	55.5185	9.25813e-14	2.05072e-11	2.7776	8.30165	1194.16	1.14e-261	2.26e-259	2.77746	8.30019	1193.26	1.77912e-261	6.13739e-259	NA	NA	NA	NA	NA	NA	NA	NA	0.453341	0	0	1	2.51452	0.133909	0.0532542	2	2.38062	749601	1173	3.66667	1.09755	0.461035	3	0.00344112	0.74844	3.17617	0.00149233
403	PAPOLG	2.83908	6.25555	34.7316	3.78e-09	2.3e-07	2.83918	6.25392	34.7457	3.75701e-09	3.77476e-07	2.77361	5.89178	232.363	1.82e-52	4.73e-51	2.77348	5.89033	232.337	1.84331e-52	8.28822e-51	NA	NA	NA	NA	NA	NA	NA	NA	4.6443	0	0	1	4.70333	0	0	1	4.67381	185422	736	3.5	0.0295132	0.00631458	2	0.0486408	1.49269	3.09855	0.00194469
404	CCDC11	NA	NA	NA	NA	NA	0.929679	1.42962	0.369203	0.543439	1	2.77016	1.43892	4.72983	0.0296439	0.0472739	2.77006	1.4375	4.72938	0.0296516	0.0817516	NA	NA	NA	NA	NA	NA	NA	NA	NA	NA	NA	NA	NA	NA	NA	NA	NA	NA	NA	NA	NA	NA	NA	NA	NA	NA	NA
405	MYB	2.33124	2.34425	6.48204	0.010897	0.057179	2.33133	2.34261	6.45602	0.0110577	0.0946267	2.76553	3.01032	25.8212	3.75e-07	1.32e-06	2.7654	3.00889	25.8184	3.751e-07	2.28128e-06	NA	NA	NA	NA	NA	NA	NA	NA	NA	NA	NA	NA	NA	NA	NA	NA	NA	NA	NA	NA	NA	NA	NA	NA	NA	NA	NA
406	ZNF92	2.62296	4.8543	17.6368	2.67e-05	0.000520203	2.62306	4.85267	17.5922	2.73706e-05	0.000870031	2.76335	5.11886	132.595	1.11e-30	1.55e-29	2.76322	5.11741	132.58	1.11707e-30	2.705e-29	NA	NA	NA	NA	NA	NA	NA	NA	NA	NA	NA	NA	NA	NA	NA	NA	NA	NA	NA	NA	NA	NA	NA	NA	NA	NA	NA
407	NUDT4	2.42639	8.00529	11.7372	0.000612631	0.00673999	2.42653	8.00367	11.7258	0.000616396	0.0111338	2.75793	7.94086	961.889	3.45e-211	5.12e-209	2.7578	7.9394	961.781	3.64585e-211	9.35604e-209	1.41689	0	0	1	0.941369	0	0	1	2.22106	1.4714	0.662479	3	4.31961	2.95377	0.683806	3	3.27034	761706	180.167	3.5	2.73174	0.83531	6	-0.0147789	0.402119	8.1695	3.09672e-16
408	LGMN	0.675006	6.21476	0.677739	0.410366	0.616345	0.675065	6.21314	0.676415	0.410824	0.950728	2.75472	5.58093	184.445	5.19e-42	1.03e-40	2.75459	5.57947	184.424	5.24158e-42	1.80521e-40	NA	NA	NA	NA	-0.640679	0	0	1	NA	NA	NA	NA	NA	NA	NA	NA	NA	NA	NA	NA	NA	NA	NA	NA	NA	NA	NA
409	ARHGEF3	1.23884	6.39456	13.6563	0.000219505	0.0029716	1.23894	6.39293	13.7002	0.000214429	0.00476476	2.75108	6.27087	300.705	2.31e-67	7.81e-66	2.75095	6.26941	300.671	2.35227e-67	1.37496e-65	NA	NA	NA	NA	NA	NA	NA	NA	NA	NA	NA	NA	NA	NA	NA	NA	NA	NA	NA	NA	NA	NA	NA	NA	NA	NA	NA
410	DKK2	NA	NA	NA	NA	NA	1.484	1.77636	1.32377	0.249917	0.724879	2.74918	1.5007	5.12719	0.0235538	0.0384342	2.74908	1.49928	5.12669	0.0235606	0.0664897	NA	NA	NA	NA	NA	NA	NA	NA	NA	NA	NA	NA	NA	NA	NA	NA	NA	NA	NA	NA	NA	NA	NA	NA	NA	NA	NA
411	CDKN2AIP	2.19771	5.83369	31.1436	2.4e-08	1.17e-06	2.19781	5.83206	31.1152	2.43163e-08	1.93821e-06	2.74559	6.3028	306.767	1.11e-68	3.81e-67	2.74545	6.30135	306.732	1.12494e-68	6.70596e-67	NA	NA	NA	NA	0.678496	0	0	1	0.608388	0.827568	1.36026	8	0.386529	1.24183	3.21278	8	0.500504	306058	580	3.5	1.47754	2.9521	16	0.0019004	0.207115	2.40737	0.0160679
412	AOC3	-1.09481	2.73477	0.95578	0.328252	0.540752	-1.09471	2.73311	0.948094	0.330205	0.847688	2.74391	1.76044	7.25586	0.00706699	0.0129522	2.74379	1.75902	7.25512	0.00706993	0.0224291	NA	NA	NA	NA	NA	NA	NA	NA	NA	NA	NA	NA	NA	NA	NA	NA	NA	NA	NA	NA	NA	NA	NA	NA	NA	NA	NA
413	RP11-82I10.1	2.24677	1.407	1.71619	0.190185	0.388125	2.24688	1.40536	1.7065	0.19144	0.623506	2.74149	1.6515	6.2975	0.0120908	0.0211276	2.74138	1.65008	6.29687	0.0120952	0.0365635	NA	NA	NA	NA	NA	NA	NA	NA	NA	NA	NA	NA	NA	NA	NA	NA	NA	NA	NA	NA	NA	NA	NA	NA	NA	NA	NA
414	KHDC1L	3.74051	1.53902	4.30049	0.0381014	0.137069	3.74057	1.53737	4.27264	0.0387308	0.226474	2.73967	1.36574	4.16008	0.0413875	0.0637679	2.73958	1.36432	4.15969	0.041397	0.110051	5.68604	1.58872	0.279407	3	5.11768	3.84034	0.750406	3	5.75319	2.96085	0.514644	13	8.14274	2.62844	0.322796	11	6.97288	1.25903e+06	128	3.45833	2.65521	0.380791	24	0.00688012	0.166538	41.8282	0
415	KHDC1L	3.74051	1.53902	4.30049	0.0381014	0.137069	13.9283	10.0492	219.672	1.06638e-49	4.48796e-46	2.73967	1.36574	4.16008	0.0413875	0.0637679	6.97762	10.2015	4733.81	0	0	5.68604	1.58872	0.279407	3	5.11768	3.84034	0.750406	3	5.75319	2.96085	0.514644	13	8.14274	2.62844	0.322796	11	6.97288	1.25903e+06	128	3.45833	2.65521	0.380791	24	0.00688012	0.166538	41.8282	0
416	SLC30A3	NA	NA	NA	NA	NA	1.84873	1.29338	1.02427	0.311509	0.820902	2.73653	1.41357	4.47349	0.0344246	0.0540819	2.73643	1.41215	4.47306	0.0344332	0.0934578	NA	NA	NA	NA	NA	NA	NA	NA	NA	NA	NA	NA	NA	NA	NA	NA	NA	NA	NA	NA	NA	NA	NA	NA	NA	NA	NA
417	SLC3A1	4.91453	2.72413	10.8747	0.000974858	0.00970406	4.91464	2.72249	10.8079	0.0010107	0.016398	2.73447	2.21714	12.1137	0.000500516	0.00114078	2.73435	2.21571	12.1124	0.000500866	0.00197595	NA	NA	NA	NA	NA	NA	NA	NA	NA	NA	NA	NA	NA	NA	NA	NA	NA	NA	NA	NA	NA	NA	NA	NA	NA	NA	NA
418	RP11-345J4.8	2.36234	3.88103	18.6163	1.6e-05	0.000331587	2.36245	3.87939	18.493	1.70525e-05	0.00057598	2.73116	3.79623	48.3106	3.64e-12	2e-11	2.73103	3.79479	48.3052	3.64785e-12	3.46398e-11	NA	NA	NA	NA	NA	NA	NA	NA	NA	NA	NA	NA	NA	NA	NA	NA	NA	NA	NA	NA	NA	NA	NA	NA	NA	NA	NA
419	CCDC173	1.97376	2.26645	4.52189	0.0334638	0.125989	1.97383	2.26481	4.49825	0.0339296	0.207613	2.70929	2.14135	11.0492	0.000887256	0.00193585	2.70916	2.13992	11.048	0.000887827	0.00335206	NA	NA	NA	NA	NA	NA	NA	NA	NA	NA	NA	NA	NA	NA	NA	NA	NA	NA	NA	NA	NA	NA	NA	NA	NA	NA	NA
420	SFT2D2	2.76082	4.87484	28.8984	7.63e-08	3.28e-06	2.76092	4.87322	28.824	7.92632e-08	5.57838e-06	2.70579	4.31887	71.3083	3.06e-17	2.32e-16	2.70566	4.31743	71.3002	3.06808e-17	4.02755e-16	NA	NA	NA	NA	NA	NA	NA	NA	1.9524	0	0	1	NA	NA	NA	NA	1.9524	96128.8	160	3	0	0	1	0.194995	1.86909	0.940242	0.347093
421	CPEB4	2.16617	6.82495	32.1864	1.4e-08	7.38e-07	2.16628	6.82333	32.2667	1.34395e-08	1.15904e-06	2.70554	6.55355	358.845	5.02e-80	2.07e-78	2.7054	6.55209	358.805	5.12743e-80	3.65751e-78	NA	NA	NA	NA	NA	NA	NA	NA	NA	NA	NA	NA	NA	NA	NA	NA	NA	NA	NA	NA	NA	NA	NA	NA	NA	NA	NA
422	TMEM81	2.57795	2.66241	9.95721	0.00160221	0.014162	2.57804	2.66077	9.90449	0.00164876	0.0237799	2.70162	3.09464	26.904	2.14e-07	7.67e-07	2.70149	3.09321	26.901	2.14151e-07	1.32971e-06	NA	NA	NA	NA	NA	NA	NA	NA	NA	NA	NA	NA	NA	NA	NA	NA	NA	NA	NA	NA	NA	NA	NA	NA	NA	NA	NA
423	RHOBTB1	2.67451	7.18719	48.5564	3.21e-12	3.59e-10	2.6746	7.18557	48.6997	2.98317e-12	5.50657e-10	2.70148	7.08521	519.05	6.81e-115	4.22e-113	2.70135	7.08375	518.991	7.01635e-115	7.53291e-113	NA	NA	NA	NA	NA	NA	NA	NA	NA	NA	NA	NA	NA	NA	NA	NA	NA	NA	NA	NA	NA	NA	NA	NA	NA	NA	NA
424	SLC25A44	2.34596	6.50197	37.565	8.84e-10	6.28e-08	2.34606	6.50035	37.6421	8.49886e-10	9.93564e-08	2.69908	6.62584	376.311	7.91e-84	3.41e-82	2.69895	6.62438	376.268	8.07971e-84	6.02912e-82	NA	NA	NA	NA	NA	NA	NA	NA	-0.500694	0	0	1	NA	NA	NA	NA	-0.500694	188780	314	3	0	0	1	0.0357449	1.79191	-0.299367	0.76466
425	RNF19B	1.3042	5.30658	11.731	0.000614668	0.00675085	1.30429	5.30495	11.6581	0.000639235	0.011448	2.69248	5.47002	165.226	8.17e-38	1.44e-36	2.69235	5.46856	165.207	8.24419e-38	2.51794e-36	NA	NA	NA	NA	NA	NA	NA	NA	NA	NA	NA	NA	NA	NA	NA	NA	NA	NA	NA	NA	NA	NA	NA	NA	NA	NA	NA
426	ULBP3	2.157	3.5306	8.67893	0.00321909	0.0241969	2.1571	3.52897	8.63143	0.00330412	0.0403064	2.69063	3.68095	43.2428	4.84e-11	2.44e-10	2.6905	3.67951	43.2379	4.84731e-11	4.23069e-10	NA	NA	NA	NA	NA	NA	NA	NA	2.01294	0.895209	0.444727	2	1.28045	0	0	1	1.28045	465248	244	3.33333	0.895209	0.699136	3	0.0181763	0.837458	1.50727	0.131742
427	HES1	1.23429	1.641	0.860734	0.353533	0.56307	1.23444	1.63935	0.852106	0.355957	0.880435	2.6863	1.63293	5.97367	0.014521	0.0248665	2.68619	1.63151	5.97306	0.014526	0.0430402	NA	NA	NA	NA	NA	NA	NA	NA	NA	NA	NA	NA	NA	NA	NA	NA	NA	NA	NA	NA	NA	NA	NA	NA	NA	NA	NA
428	TRIB1	0.909919	2.41867	1.28912	0.25621	0.464947	0.910003	2.41702	1.28064	0.257779	0.738322	2.68505	2.44993	14.9182	0.000112273	0.000284487	2.68492	2.4485	14.9166	0.000112371	0.000492837	NA	NA	NA	NA	NA	NA	NA	NA	NA	NA	NA	NA	NA	NA	NA	NA	NA	NA	NA	NA	NA	NA	NA	NA	NA	NA	NA
429	SLC6A10P	NA	NA	NA	NA	NA	1.55155	1.28738	0.744366	0.388266	0.922141	2.68161	1.33537	3.84338	0.0499427	0.0754104	2.68152	1.33395	3.84302	0.0499534	0.129983	NA	NA	NA	NA	NA	NA	NA	NA	NA	NA	NA	NA	NA	NA	NA	NA	NA	NA	NA	NA	NA	NA	NA	NA	NA	NA	NA
430	FAM81A	NA	NA	NA	NA	NA	2.24893	1.28841	1.41733	0.233844	0.700068	2.67697	1.55454	5.33635	0.0208851	0.0344807	2.67686	1.55312	5.33581	0.0208916	0.0596583	NA	NA	NA	NA	NA	NA	NA	NA	-1.92195	0	0	1	NA	NA	NA	NA	-1.92195	156240	368	3	0	0	1	0.0863162	1.98173	-1.01339	0.310874
431	HIST1H2BK	1.17757	5.54091	4.6851	0.0304252	0.117936	1.17766	5.53928	4.6661	0.0307637	0.194286	2.67602	5.41901	157.958	3.16e-36	5.34e-35	2.67589	5.41756	157.94	3.1904e-36	9.33737e-35	NA	NA	NA	NA	NA	NA	NA	NA	NA	NA	NA	NA	NA	NA	NA	NA	NA	NA	NA	NA	NA	NA	NA	NA	NA	NA	NA
432	SLC25A25	1.50573	5.28998	14.0039	0.000182427	0.00254574	1.50582	5.28834	13.9137	0.0001914	0.00434012	2.67532	5.80152	207.73	4.3e-47	9.93e-46	2.67519	5.80006	207.706	4.34921e-47	1.73993e-45	NA	NA	NA	NA	NA	NA	NA	NA	NA	NA	NA	NA	NA	NA	NA	NA	NA	NA	NA	NA	NA	NA	NA	NA	NA	NA	NA
433	KDM5B	2.48522	8.66766	34.6319	3.98e-09	2.39e-07	2.48531	8.66605	34.7202	3.80667e-09	3.77848e-07	2.67348	8.4413	1202.09	2.15e-263	4.35e-261	2.67334	8.43983	1201.07	3.56475e-263	1.25022e-260	NA	NA	NA	NA	NA	NA	NA	NA	NA	NA	NA	NA	NA	NA	NA	NA	NA	NA	NA	NA	NA	NA	NA	NA	NA	NA	NA
434	HAS3	0.755004	1.70006	0.392901	0.530778	0.713462	0.755028	1.69841	0.391018	0.531765	1	2.67214	2.13317	10.75	0.00104279	0.00224218	2.67202	2.13174	10.7488	0.00104344	0.00388348	NA	NA	NA	NA	NA	NA	NA	NA	NA	NA	NA	NA	NA	NA	NA	NA	NA	NA	NA	NA	NA	NA	NA	NA	NA	NA	NA
435	MCMDC2	1.9353	2.03018	3.24277	0.0717391	0.208129	1.9353	2.02854	3.2243	0.0725529	0.341398	2.65264	1.61324	5.71448	0.0168256	0.0284048	2.65253	1.61181	5.71389	0.0168312	0.0491629	NA	NA	NA	NA	NA	NA	NA	NA	NA	NA	NA	NA	NA	NA	NA	NA	NA	NA	NA	NA	NA	NA	NA	NA	NA	NA	NA
436	FAXC	2.2586	1.60835	2.32024	0.1277	0.301792	2.25876	1.6067	2.29993	0.12938	0.491406	2.65037	2.07796	10.0168	0.00155122	0.00323581	2.65025	2.07653	10.0157	0.00155214	0.00560234	NA	NA	NA	NA	NA	NA	NA	NA	NA	NA	NA	NA	NA	NA	NA	NA	NA	NA	NA	NA	NA	NA	NA	NA	NA	NA	NA
437	FAM218A	0.749129	2.10836	0.413152	0.520374	0.706186	0.749419	2.10672	0.407928	0.523023	1	2.64187	2.85519	21.2126	4.11e-06	1.28e-05	2.64174	2.85375	21.2102	4.11576e-06	2.21503e-05	NA	NA	NA	NA	NA	NA	NA	NA	NA	NA	NA	NA	NA	NA	NA	NA	NA	NA	NA	NA	NA	NA	NA	NA	NA	NA	NA
438	ARL4D	1.36754	4.76914	9.57384	0.00197369	0.0164722	1.36765	4.7675	9.54399	0.00200605	0.0273935	2.63304	4.59772	84.7289	3.42e-20	3.13e-19	2.63291	4.59627	84.719	3.43922e-20	5.44556e-19	NA	NA	NA	NA	NA	NA	NA	NA	5.9445	0	0	1	NA	NA	NA	NA	5.9445	564733	201	3	0	0	1	0.0318485	1.94183	3.04488	0.00232772
439	MORC4	2.9802	4.54799	37.5264	9.02e-10	6.34e-08	0.839021	5.78658	0.841592	0.358942	0.883948	2.62539	4.54302	81.0223	2.23e-19	1.95e-18	1.05285	5.81277	44.4849	2.56331e-11	2.28946e-10	NA	NA	NA	NA	NA	NA	NA	NA	NA	NA	NA	NA	NA	NA	NA	NA	NA	NA	NA	NA	NA	NA	NA	NA	NA	NA	NA
440	MORC4	2.9802	4.54799	37.5264	9.02e-10	6.34e-08	2.9803	4.54636	37.4436	9.40944e-10	1.085e-07	2.62539	4.54302	81.0223	2.23e-19	1.95e-18	2.62526	4.54158	81.013	2.24243e-19	3.38504e-18	NA	NA	NA	NA	NA	NA	NA	NA	NA	NA	NA	NA	NA	NA	NA	NA	NA	NA	NA	NA	NA	NA	NA	NA	NA	NA	NA
441	CRX	1.44647	1.5756	1.04991	0.305528	0.517638	1.44654	1.57396	1.04056	0.307691	0.815664	2.61482	1.70515	6.32674	0.0118931	0.020803	2.6147	1.70373	6.32607	0.0118976	0.0360179	NA	NA	NA	NA	NA	NA	NA	NA	NA	NA	NA	NA	NA	NA	NA	NA	NA	NA	NA	NA	NA	NA	NA	NA	NA	NA	NA
442	TUFT1	1.34008	5.62227	8.61527	0.00333357	0.0246822	1.34018	5.62064	8.58376	0.00339174	0.0410422	2.61377	5.99922	231.672	2.57e-52	6.66e-51	2.61364	5.99776	231.645	2.60928e-52	1.16575e-50	NA	NA	NA	NA	NA	NA	NA	NA	NA	NA	NA	NA	4.18671	0	0	1	4.18671	158236	409	4	0	0	1	0.118612	2.10622	1.93147	0.0534254
443	MAP3K8	-1.5189	2.80569	3.5274	0.0603623	0.185342	-1.51884	2.80405	3.49351	0.0616098	0.305698	2.61162	2.12091	10.2808	0.00134423	0.00283468	2.61149	2.11949	10.2796	0.00134506	0.00490964	NA	NA	NA	NA	NA	NA	NA	NA	NA	NA	NA	NA	NA	NA	NA	NA	NA	NA	NA	NA	NA	NA	NA	NA	NA	NA	NA
444	NFKBIB	2.09898	5.61744	27.7098	1.41e-07	5.53e-06	2.09907	5.61582	27.6217	1.47511e-07	9.43487e-06	2.6093	5.83724	205.949	1.05e-46	2.41e-45	2.60917	5.83578	205.925	1.0643e-46	4.21772e-45	NA	NA	NA	NA	NA	NA	NA	NA	0.618667	0.372816	0.602611	3	0.116721	0.632281	5.41704	2	0.618667	452985	356	3.4	0.368768	0.596069	5	0.00449406	0.484831	1.26678	0.205235
445	C7orf53	NA	NA	NA	NA	NA	0.34952	1.50179	0.061254	0.804525	1	2.60163	1.59583	5.42881	0.0198072	0.0328499	2.60152	1.5944	5.42824	0.0198137	0.0568346	NA	NA	NA	NA	NA	NA	NA	NA	NA	NA	NA	NA	NA	NA	NA	NA	NA	NA	NA	NA	NA	NA	NA	NA	NA	NA	NA
446	AP1S3	1.78965	2.3715	4.11168	0.0425881	0.147994	1.78969	2.36986	4.08403	0.0432904	0.244099	2.59981	2.88007	21.2149	4.11e-06	1.28e-05	2.59968	2.87863	21.2125	4.1108e-06	2.21342e-05	NA	NA	NA	NA	NA	NA	NA	NA	NA	NA	NA	NA	NA	NA	NA	NA	NA	NA	NA	NA	NA	NA	NA	NA	NA	NA	NA
447	KLHL21	0.595	6.61627	1.2063	0.272066	0.483693	0.595119	6.61462	1.20597	0.272132	0.763396	2.59227	7.495	651.654	9.76e-144	9.2e-142	2.59214	7.49354	651.577	1.01429e-143	1.65456e-141	NA	NA	NA	NA	NA	NA	NA	NA	NA	NA	NA	NA	NA	NA	NA	NA	NA	NA	NA	NA	NA	NA	NA	NA	NA	NA	NA
448	ATAD2B	2.05583	5.43742	18.8001	1.45e-05	0.000306553	2.05592	5.43579	18.7028	1.52761e-05	0.000526113	2.58943	5.1982	128.736	7.75e-30	1.06e-28	2.58929	5.19675	128.721	7.80482e-30	1.85369e-28	NA	NA	NA	NA	NA	NA	NA	NA	NA	NA	NA	NA	NA	NA	NA	NA	NA	NA	NA	NA	NA	NA	NA	NA	NA	NA	NA
449	RGS2	0.279926	7.26069	0.0497954	0.82342	0.904201	0.280091	7.25901	0.0497404	0.823516	1	2.58672	6.23973	270.73	7.87e-61	2.4e-59	2.58659	6.23828	270.698	7.99236e-61	4.22571e-59	NA	NA	NA	NA	NA	NA	NA	NA	3.51058	0	0	1	NA	NA	NA	NA	3.51058	85705.7	211	3	0	0	1	0.155488	2.28171	1.47043	0.141446
450	SAP18	2.38535	7.89897	38.6363	5.11e-10	3.91e-08	2.38545	7.89735	38.7705	4.76666e-10	5.97052e-08	2.58465	8.36098	1122.83	3.6e-246	6.16e-244	2.58451	8.35951	1122.23	4.87637e-246	1.44526e-243	-0.406063	0.404716	-0.996683	4	0.0877681	0.360607	4.10863	8	0.901613	1.56803	1.73914	9	1.0196	0.885983	0.868952	7	0.915166	2.19932e+06	153	3.4375	1.10428	1.20665	16	0.00236944	0.205416	4.44365	8.84436e-06
451	KLF3	1.27329	6.23047	4.38921	0.0361671	0.132674	1.27342	6.22883	4.38482	0.0362604	0.217201	2.58249	6.55299	336.777	3.21e-75	1.21e-73	2.58235	6.55153	336.737	3.27708e-75	2.13497e-73	NA	NA	NA	NA	NA	NA	NA	NA	NA	NA	NA	NA	NA	NA	NA	NA	NA	NA	NA	NA	NA	NA	NA	NA	NA	NA	NA
452	C8orf33	2.53779	7.04132	27.7397	1.39e-07	5.46e-06	2.53789	7.0397	27.7574	1.37519e-07	8.98215e-06	2.58244	7.46641	635.601	3.02e-140	2.78e-138	2.5823	7.46494	635.526	3.13973e-140	4.96761e-138	NA	NA	NA	NA	NA	NA	NA	NA	1.20029	0	0	1	0.468292	0	0	1	0.83429	1.89431e+06	242	3.5	0.365997	0.438693	2	0.0996691	1.54929	0.474166	0.635381
453	INO80C	2.74344	4.88884	40.4496	2.02e-10	1.67e-08	2.74354	4.88721	40.2976	2.18076e-10	2.96063e-08	2.58201	4.90118	103.239	2.97e-24	3.25e-23	2.58188	4.89973	103.226	2.98954e-24	5.66747e-23	NA	NA	NA	NA	NA	NA	NA	NA	-2.98758	0	0	1	NA	NA	NA	NA	-2.98758	85587.3	228	3	0	0	1	0.117391	2.0223	-1.53537	0.124693
454	MFSD2A	1.90071	3.86383	14.2712	0.000158272	0.0022754	1.90079	3.8622	14.1498	0.000168813	0.00393391	2.58072	3.84015	46.3225	1e-11	5.33e-11	2.58059	3.83871	46.3171	1.00585e-11	9.24281e-11	NA	NA	NA	NA	NA	NA	NA	NA	NA	NA	NA	NA	NA	NA	NA	NA	NA	NA	NA	NA	NA	NA	NA	NA	NA	NA	NA
455	ZDHHC23	1.48452	1.91954	1.72281	0.189332	0.386875	1.48451	1.9179	1.70872	0.191151	0.622951	2.5799	1.86547	7.57577	0.00591581	0.0110337	2.57979	1.86404	7.57494	0.00591853	0.0191077	NA	NA	NA	NA	NA	NA	NA	NA	NA	NA	NA	NA	NA	NA	NA	NA	NA	NA	NA	NA	NA	NA	NA	NA	NA	NA	NA
456	USP38	2.40377	7.11552	35.9616	2.01e-09	1.31e-07	2.40388	7.1139	36.0475	1.92562e-09	2.05689e-07	2.57152	6.86529	416.511	1.4e-92	6.76e-91	2.57139	6.86383	416.462	1.43721e-92	1.20012e-90	NA	NA	NA	NA	NA	NA	NA	NA	NA	NA	NA	NA	NA	NA	NA	NA	NA	NA	NA	NA	NA	NA	NA	NA	NA	NA	NA
457	EIF4A3	2.11814	7.75446	19.1075	1.24e-05	0.000267974	2.11824	7.75284	19.1248	1.22446e-05	0.000435978	2.57077	8.04276	937.53	6.81e-206	9.63e-204	2.57064	8.04129	937.419	7.20248e-206	1.76235e-203	-0.261145	0.385146	-1.47484	13	0.640969	0.183919	0.286939	9	0.954753	0.624405	0.653996	84	0.63789	1.08252	1.69703	103	0.799248	1.04856e+06	411	3.5508	0.938146	1.17379	187	-0.00186907	0.0583267	13.735	6.26666e-43
458	PTPRR	2.50563	2.92021	8.00727	0.004659	0.0314868	2.50575	2.91858	7.94109	0.00483247	0.0529358	2.56951	2.36674	12.9467	0.000320488	0.000753807	2.56939	2.36532	12.9452	0.00032074	0.00130573	NA	NA	NA	NA	NA	NA	NA	NA	NA	NA	NA	NA	NA	NA	NA	NA	NA	NA	NA	NA	NA	NA	NA	NA	NA	NA	NA
459	TDRD3	2.57182	5.61005	37.3521	9.86e-10	6.87e-08	2.57191	5.60843	37.2102	1.0606e-09	1.19348e-07	2.56947	5.22434	129.808	4.51e-30	6.23e-29	2.56934	5.22289	129.793	4.54864e-30	1.08646e-28	NA	NA	NA	NA	NA	NA	NA	NA	NA	NA	NA	NA	NA	NA	NA	NA	NA	NA	NA	NA	NA	NA	NA	NA	NA	NA	NA
460	AKAP17A	2.44487	7.46474	31.5559	1.94e-08	9.77e-07	2.44495	7.46312	31.6092	1.88538e-08	1.57288e-06	2.56896	7.0219	463.846	7e-103	3.78e-101	2.56882	7.02044	463.791	7.1935e-103	6.72768e-101	NA	NA	NA	NA	NA	NA	NA	NA	NA	NA	NA	NA	NA	NA	NA	NA	NA	NA	NA	NA	NA	NA	NA	NA	NA	NA	NA
461	BRD2	2.04971	9.55866	26.3815	2.8e-07	9.87e-06	2.04981	9.55704	26.4673	2.68036e-07	1.5755e-05	2.56887	9.40265	1161.44	1.47e-254	2.78e-252	2.56873	9.40118	1152.29	1.42867e-252	4.55507e-250	NA	NA	NA	NA	NA	NA	NA	NA	NA	NA	NA	NA	NA	NA	NA	NA	NA	NA	NA	NA	NA	NA	NA	NA	NA	NA	NA
462	C11orf82	3.89696	5.3489	34.5598	4.13e-09	2.47e-07	3.89705	5.34727	34.3943	4.50033e-09	4.40467e-07	2.56596	6.14302	250.05	2.53e-56	7.19e-55	2.56583	6.14157	250.02	2.57094e-56	1.26403e-54	NA	NA	NA	NA	NA	NA	NA	NA	NA	NA	NA	NA	NA	NA	NA	NA	NA	NA	NA	NA	NA	NA	NA	NA	NA	NA	NA
463	EPHA5	2.75661	2.94678	7.31705	0.00683033	0.0414363	2.75667	2.94514	7.27762	0.00698189	0.0689118	2.56388	3.44619	33.5431	6.97e-09	2.93e-08	2.56375	3.44475	33.5392	6.98424e-09	5.08369e-08	NA	NA	NA	NA	NA	NA	NA	NA	NA	NA	NA	NA	NA	NA	NA	NA	NA	NA	NA	NA	NA	NA	NA	NA	NA	NA	NA
464	MLF1	2.36854	4.28969	22.7775	1.82e-06	5.13e-05	2.36864	4.28806	22.6961	1.89757e-06	8.73755e-05	2.56063	4.74124	90.7109	1.66e-21	1.64e-20	2.56049	4.7398	90.7002	1.67176e-21	2.84849e-20	NA	NA	NA	NA	NA	NA	NA	NA	NA	NA	NA	NA	NA	NA	NA	NA	NA	NA	NA	NA	NA	NA	NA	NA	NA	NA	NA
465	PCDH19	-0.0576949	4.16429	0.0167584	0.896998	0.946723	-0.0575857	4.16265	0.0166022	0.897477	1	2.55431	2.06062	9.33863	0.00224373	0.00453634	2.55419	2.05919	9.33759	0.00224501	0.0078566	NA	NA	NA	NA	NA	NA	NA	NA	NA	NA	NA	NA	NA	NA	NA	NA	NA	NA	NA	NA	NA	NA	NA	NA	NA	NA	NA
466	NR4A1	0.251776	2.92359	0.159952	0.689201	0.825154	0.251857	2.92195	0.158927	0.690146	1	2.54544	3.01	23.0756	1.56e-06	5.1e-06	2.54531	3.00857	23.0729	1.55973e-06	8.84911e-06	NA	NA	NA	NA	NA	NA	NA	NA	NA	NA	NA	NA	NA	NA	NA	NA	NA	NA	NA	NA	NA	NA	NA	NA	NA	NA	NA
467	TFRC	1.33781	8.51408	10.6293	0.00111309	0.0107312	1.33791	8.51245	10.6572	0.00109643	0.0174137	2.54348	8.42171	1143.87	9.66e-251	1.73e-248	2.54334	8.42024	1143.86	9.66943e-251	3.03692e-248	-0.406925	0.425655	-1.04603	18	-0.320848	1.22007	-3.80264	24	0.487615	0.474833	0.973788	41	0.18448	0.439669	2.38329	49	0.280503	798451	760	3.54444	0.529878	1.88903	90	-0.000409364	0.0835971	3.36031	0.000778559
468	C1orf63	2.65101	7.96414	24.5767	7.14e-07	2.27e-05	2.6511	7.96253	24.5824	7.11997e-07	3.727e-05	2.5402	7.59666	679.381	9.11e-150	8.93e-148	2.54007	7.5952	679.3	9.48596e-150	1.60978e-147	NA	NA	NA	NA	NA	NA	NA	NA	NA	NA	NA	NA	7.34773	0	0	1	7.34773	1.0261e+06	291	4	0	0	1	0.0144368	1.93602	3.78781	0.000151979
469	SESN3	2.46559	4.57787	7.92366	0.00487926	0.0325478	2.46571	4.57624	7.90133	0.00493984	0.053776	2.53498	2.00971	8.73142	0.00312772	0.00612493	2.53486	2.00828	8.73044	0.00312941	0.0106059	NA	NA	NA	NA	NA	NA	NA	NA	NA	NA	NA	NA	NA	NA	NA	NA	NA	NA	NA	NA	NA	NA	NA	NA	NA	NA	NA
470	KLHL11	2.14842	4.35009	23.1857	1.47e-06	4.32e-05	2.14852	4.34846	23.1131	1.52749e-06	7.30522e-05	2.53332	3.80097	43.7765	3.68e-11	1.88e-10	2.53319	3.79953	43.7713	3.69072e-11	3.25635e-10	NA	NA	NA	NA	NA	NA	NA	NA	NA	NA	NA	NA	NA	NA	NA	NA	NA	NA	NA	NA	NA	NA	NA	NA	NA	NA	NA
471	TP53BP2	2.39861	7.4903	40.0497	2.48e-10	2.02e-08	2.39872	7.48868	40.184	2.31133e-10	3.11329e-08	2.53011	7.39901	589.613	3.04e-130	2.35e-128	2.52998	7.39755	589.542	3.15095e-130	4.22328e-128	NA	NA	NA	NA	NA	NA	NA	NA	NA	NA	NA	NA	NA	NA	NA	NA	NA	NA	NA	NA	NA	NA	NA	NA	NA	NA	NA
472	NOTUM	0.412237	2.45052	0.117006	0.732304	0.850415	0.412323	2.44888	0.11555	0.733912	1	2.52915	1.94705	8.10516	0.00441394	0.00842781	2.52903	1.94562	8.10425	0.00441615	0.0145908	NA	NA	NA	NA	NA	NA	NA	NA	NA	NA	NA	NA	NA	NA	NA	NA	NA	NA	NA	NA	NA	NA	NA	NA	NA	NA	NA
473	KIAA1324L	2.01568	4.63096	6.10774	0.0134591	0.0665248	2.01577	4.62934	6.08998	0.0135951	0.10982	2.52633	4.47468	73.0141	1.29e-17	1e-16	2.5262	4.47323	73.0054	1.29298e-17	1.743e-16	NA	NA	NA	NA	NA	NA	NA	NA	NA	NA	NA	NA	NA	NA	NA	NA	NA	NA	NA	NA	NA	NA	NA	NA	NA	NA	NA
474	NUDT10	1.44715	1.85474	1.54638	0.213671	0.416162	1.44727	1.8531	1.53462	0.21542	0.667022	2.5199	1.74009	6.27936	0.0122152	0.0213083	2.51979	1.73866	6.27867	0.01222	0.0368923	NA	NA	NA	NA	NA	NA	NA	NA	NA	NA	NA	NA	NA	NA	NA	NA	NA	NA	NA	NA	NA	NA	NA	NA	NA	NA	NA
475	KLF5	1.18871	6.77479	3.25057	0.0713984	0.207515	1.18878	6.77317	3.24574	0.0716094	0.338168	2.51226	6.75129	372.322	5.84e-83	2.47e-81	2.51212	6.74984	372.277	5.97644e-83	4.38196e-81	NA	NA	NA	NA	NA	NA	NA	NA	NA	NA	NA	NA	NA	NA	NA	NA	NA	NA	NA	NA	NA	NA	NA	NA	NA	NA	NA
476	RNF122	2.3363	4.91255	20.0498	7.54e-06	0.000175471	2.33641	4.91093	19.9744	7.84872e-06	0.000299204	2.50839	4.75011	88.7392	4.5e-21	4.29e-20	2.50826	4.74867	88.7285	4.52898e-21	7.48063e-20	NA	NA	NA	NA	NA	NA	NA	NA	NA	NA	NA	NA	NA	NA	NA	NA	NA	NA	NA	NA	NA	NA	NA	NA	NA	NA	NA
477	RNF38	1.68512	6.83703	21.3591	3.81e-06	9.83e-05	1.68522	6.83541	21.4162	3.69638e-06	0.000157455	2.50097	7.14011	484.948	1.79e-107	1.03e-105	2.50084	7.13865	484.89	1.8442e-107	1.83922e-105	NA	NA	NA	NA	NA	NA	NA	NA	NA	NA	NA	NA	NA	NA	NA	NA	NA	NA	NA	NA	NA	NA	NA	NA	NA	NA	NA
478	TES	3.09044	3.22798	3.03447	0.0815133	0.225751	3.09054	3.22634	3.02245	0.0821191	0.368529	2.49916	2.0589	9.037	0.0026457	0.00526238	2.49904	2.05747	9.03597	0.00264719	0.00911103	NA	NA	NA	NA	NA	NA	NA	NA	NA	NA	NA	NA	NA	NA	NA	NA	NA	NA	NA	NA	NA	NA	NA	NA	NA	NA	NA
479	CRY1	2.56888	5.7518	44.0212	3.25e-11	3.09e-09	2.56898	5.75018	43.9365	3.39209e-11	5.28739e-09	2.49787	6.39126	286.945	2.3e-64	7.45e-63	2.49774	6.3898	286.91	2.34366e-64	1.31164e-62	NA	NA	NA	NA	NA	NA	NA	NA	NA	NA	NA	NA	NA	NA	NA	NA	NA	NA	NA	NA	NA	NA	NA	NA	NA	NA	NA
480	YTHDC1	2.37482	8.02413	38.2331	6.28e-10	4.72e-08	2.37492	8.02251	38.3682	5.85786e-10	7.251e-08	2.49552	7.90716	819.821	2.65e-180	3.18e-178	2.49538	7.9057	819.722	2.78127e-180	5.79467e-178	NA	NA	NA	NA	NA	NA	NA	NA	0.806789	0	0	1	-0.300914	0.133129	-0.442414	2	-0.167785	304530	735	3.66667	0.620416	-3.69768	3	0.0155129	0.786259	-0.233127	0.815663
481	FAM126B	1.5551	5.32743	18.1945	1.99e-05	0.000400174	1.5552	5.3258	18.0822	2.11575e-05	0.000693485	2.49124	5.43844	145.106	2.04e-33	3.08e-32	2.4911	5.43699	145.088	2.05415e-33	5.383e-32	NA	NA	NA	NA	NA	NA	NA	NA	NA	NA	NA	NA	NA	NA	NA	NA	NA	NA	NA	NA	NA	NA	NA	NA	NA	NA	NA
482	RYBP	2.24596	7.35614	25.9545	3.5e-07	1.2e-05	2.24608	7.35452	25.998	3.41765e-07	1.92293e-05	2.49081	7.19501	500.853	6.2e-111	3.71e-109	2.49067	7.19355	500.792	6.39115e-111	6.62508e-109	NA	NA	NA	NA	NA	NA	NA	NA	2.53509	0.0277374	0.0109414	2	NA	NA	NA	NA	2.53509	288565	228	3	0.0277374	0.0109414	2	0.0136191	1.30702	1.92918	0.0537091
483	YRDC	2.85831	5.64356	48.213	3.82e-12	4.17e-10	2.8584	5.64194	48.064	4.1254e-12	7.35685e-10	2.4898	5.79443	187.158	1.33e-42	2.69e-41	2.48967	5.79297	187.135	1.34163e-42	4.72106e-41	NA	NA	NA	NA	1.72116	0	0	1	2.02883	0.238418	0.117515	2	-1.61632	2.73435	-1.69171	2	1.45422	222918	279	3.5	2.15877	1.48449	4	0.0154113	0.57264	2.51258	0.0119851
484	HMCN1	2.31786	1.50116	2.07943	0.149296	0.333293	2.31803	1.49952	2.06487	0.150728	0.539485	2.4879	1.45483	4.15133	0.0416018	0.0640413	2.4878	1.4534	4.1509	0.0416125	0.110534	NA	NA	NA	NA	-16.1869	2.95876	-0.182787	2	NA	NA	NA	NA	11.7086	0	0	1	11.7086	5.86981e+06	5635	4	0	0	1	0.185024	2.10819	5.4661	4.60035e-08
485	RAPGEF2	1.70235	6.35173	20.5681	5.75e-06	0.000140175	1.70245	6.35011	20.6061	5.6415e-06	0.000225264	2.48356	6.78077	373.916	2.63e-83	1.12e-81	2.48343	6.77931	373.871	2.68816e-83	1.9918e-81	NA	NA	NA	NA	NA	NA	NA	NA	NA	NA	NA	NA	NA	NA	NA	NA	NA	NA	NA	NA	NA	NA	NA	NA	NA	NA	NA
486	DNAJA1	2.37302	8.76596	37.8461	7.66e-10	5.56e-08	2.37312	8.76434	37.9883	7.11684e-10	8.56697e-08	2.48221	9.15954	1647.12	0	0	2.48208	9.15807	1651.92	0	0	-0.133457	0.181024	-1.35642	3	1.47051	0.287574	0.19556	4	1.64157	1.3193	0.803685	27	1.03695	2.18985	2.11183	31	1.43054	442065	397	3.53448	1.87965	1.31395	58	-0.00220919	0.107897	13.2789	3.06934e-40
487	HIC2	2.2118	2.96455	9.83785	0.00170958	0.0149063	2.21189	2.96292	9.77478	0.00176922	0.0250706	2.48084	2.61329	15.6123	7.77e-05	0.000202069	2.48072	2.61186	15.6105	7.78217e-05	0.000349915	NA	NA	NA	NA	NA	NA	NA	NA	0.824296	0	0	1	NA	NA	NA	NA	0.824296	26636.9	597	3	0	0	1	0.148185	2.09747	0.322346	0.74719
488	CTC-534A2.2	2.49384	2.68141	9.54795	0.00200173	0.0166306	2.4939	2.67978	9.48766	0.00206858	0.028029	2.46832	2.40166	12.663	0.000372956	0.000868445	2.4682	2.40024	12.6615	0.000373253	0.00150438	NA	NA	NA	NA	NA	NA	NA	NA	NA	NA	NA	NA	NA	NA	NA	NA	NA	NA	NA	NA	NA	NA	NA	NA	NA	NA	NA
489	RP11-305N23.1	1.72587	1.98349	2.55294	0.110089	0.274764	1.72599	1.98185	2.53932	0.111043	0.447467	2.46677	1.88448	7.2707	0.00700886	0.0128612	2.46666	1.88306	7.26987	0.00701208	0.0222658	NA	NA	NA	NA	NA	NA	NA	NA	NA	NA	NA	NA	NA	NA	NA	NA	NA	NA	NA	NA	NA	NA	NA	NA	NA	NA	NA
490	GDF9	2.13489	1.59287	2.0806	0.149182	0.333095	2.13496	1.59122	2.06252	0.15096	0.539971	2.4625	1.69861	5.75786	0.016415	0.027789	2.46239	1.69718	5.75722	0.016421	0.0480928	NA	NA	NA	NA	NA	NA	NA	NA	NA	NA	NA	NA	NA	NA	NA	NA	NA	NA	NA	NA	NA	NA	NA	NA	NA	NA	NA
491	HSD17B13	NA	NA	NA	NA	NA	1.05592	1.28272	0.362974	0.546859	1	2.45808	1.4821	4.24847	0.0392858	0.0608459	2.45797	1.48068	4.24801	0.0392963	0.105071	NA	NA	NA	NA	NA	NA	NA	NA	NA	NA	NA	NA	NA	NA	NA	NA	NA	NA	NA	NA	NA	NA	NA	NA	NA	NA	NA
492	NMU	NA	NA	NA	NA	NA	-0.930416	1.38915	0.35604	0.550714	1	2.45633	1.85619	6.98661	0.00821218	0.0148452	2.45621	1.85477	6.98581	0.00821583	0.0257079	NA	NA	NA	NA	NA	NA	NA	NA	NA	NA	NA	NA	NA	NA	NA	NA	NA	NA	NA	NA	NA	NA	NA	NA	NA	NA	NA
493	PHLPP1	2.25838	6.6794	27.8751	1.29e-07	5.2e-06	2.25848	6.67778	27.9088	1.2717e-07	8.46845e-06	2.45263	6.34291	270.243	1e-60	3.06e-59	2.4525	6.34146	270.209	1.0216e-60	5.38785e-59	NA	NA	NA	NA	NA	NA	NA	NA	NA	NA	NA	NA	NA	NA	NA	NA	NA	NA	NA	NA	NA	NA	NA	NA	NA	NA	NA
494	AGTR1	1.37588	3.01412	4.70513	0.0300727	0.117017	1.376	3.01248	4.67727	0.0305643	0.193361	2.45123	3.03995	22.4503	2.16e-06	6.96e-06	2.4511	3.03852	22.4476	2.1596e-06	1.20702e-05	NA	NA	NA	NA	NA	NA	NA	NA	NA	NA	NA	NA	NA	NA	NA	NA	NA	NA	NA	NA	NA	NA	NA	NA	NA	NA	NA
495	GPR75	2.74404	2.33408	7.986	0.00471405	0.0317255	2.74416	2.33244	7.94819	0.00481355	0.0527835	2.4492	2.70897	16.7414	4.28e-05	0.000115702	2.44908	2.70754	16.7394	4.28801e-05	0.000200428	NA	NA	NA	NA	NA	NA	NA	NA	NA	NA	NA	NA	NA	NA	NA	NA	NA	NA	NA	NA	NA	NA	NA	NA	NA	NA	NA
496	RBM24	1.82599	6.5033	26.5209	2.61e-07	9.39e-06	1.82609	6.50168	26.5931	2.51135e-07	1.49283e-05	2.44855	6.18976	241.973	1.46e-54	3.97e-53	2.44842	6.18831	241.944	1.48214e-54	6.97733e-53	NA	NA	NA	NA	NA	NA	NA	NA	NA	NA	NA	NA	NA	NA	NA	NA	NA	NA	NA	NA	NA	NA	NA	NA	NA	NA	NA
497	XKR9	1.41831	1.55072	0.978227	0.322637	0.535081	1.41843	1.54908	0.969975	0.324686	0.840184	2.4465	1.58905	4.92127	0.0265281	0.0428048	2.44639	1.58763	4.92073	0.0265364	0.0740152	NA	NA	NA	NA	NA	NA	NA	NA	NA	NA	NA	NA	NA	NA	NA	NA	NA	NA	NA	NA	NA	NA	NA	NA	NA	NA	NA
498	GNRH1	0.967882	2.1915	1.07482	0.299858	0.511945	0.967952	2.18986	1.06526	0.302019	0.808195	2.44524	3.03885	22.3513	2.27e-06	7.32e-06	2.44511	3.03741	22.3486	2.27382e-06	1.26817e-05	NA	NA	NA	NA	NA	NA	NA	NA	NA	NA	NA	NA	NA	NA	NA	NA	NA	NA	NA	NA	NA	NA	NA	NA	NA	NA	NA
499	NGDN	2.37846	5.70616	31.0084	2.57e-08	1.24e-06	2.37856	5.70453	30.9328	2.67122e-08	2.11318e-06	2.44242	5.77271	179.327	6.8e-41	1.31e-39	2.44229	5.77125	179.305	6.87271e-41	2.2956e-39	NA	NA	NA	NA	0.914557	0	0	1	0.644918	0.754733	1.17028	5	1.30887	2.45816	1.87808	4	0.644918	1.253e+06	315	3.44444	0.794018	1.23119	9	-0.0060589	0.299021	2.17703	0.0294786
500	ZNF408	1.89889	5.22739	22.7952	1.8e-06	5.11e-05	1.899	5.22576	22.6618	1.93169e-06	8.85122e-05	2.43927	4.99605	102.187	5.05e-24	5.49e-23	2.43913	4.99461	102.175	5.08298e-24	9.55863e-23	NA	NA	NA	NA	NA	NA	NA	NA	NA	NA	NA	NA	NA	NA	NA	NA	NA	NA	NA	NA	NA	NA	NA	NA	NA	NA	NA
501	FLRT3	2.38088	4.22702	23.8564	1.04e-06	3.16e-05	2.38096	4.22539	23.7453	1.09962e-06	5.47028e-05	2.43725	3.08387	23.1181	1.52e-06	5e-06	2.43712	3.08243	23.1153	1.52573e-06	8.67024e-06	NA	NA	NA	NA	NA	NA	NA	NA	NA	NA	NA	NA	NA	NA	NA	NA	NA	NA	NA	NA	NA	NA	NA	NA	NA	NA	NA
502	TMEM133	1.39867	1.77052	1.38264	0.239652	0.446019	1.39877	1.76888	1.37581	0.240816	0.709634	2.43165	1.7458	6.0078	0.0142428	0.0244426	2.43154	1.74437	6.00712	0.0142482	0.0423065	NA	NA	NA	NA	NA	NA	NA	NA	NA	NA	NA	NA	NA	NA	NA	NA	NA	NA	NA	NA	NA	NA	NA	NA	NA	NA	NA
503	EGR1	4.88164	6.12423	51.6291	6.7e-13	8.06e-11	4.88173	6.12262	51.5933	6.8275e-13	1.34272e-10	2.42903	7.14001	405.648	3.25e-90	1.52e-88	2.42889	7.13855	402.111	1.91135e-89	1.50638e-87	NA	NA	NA	NA	NA	NA	NA	NA	NA	NA	NA	NA	NA	NA	NA	NA	NA	NA	NA	NA	NA	NA	NA	NA	NA	NA	NA
504	ZNF738	3.42189	5.22162	42.5923	6.74e-11	6.15e-09	3.42199	5.22	42.3976	7.44812e-11	1.11157e-08	2.41779	5.22801	119.453	8.33e-28	1.05e-26	2.41765	5.22656	119.438	8.39658e-28	1.83098e-26	NA	NA	NA	NA	NA	NA	NA	NA	NA	NA	NA	NA	NA	NA	NA	NA	NA	NA	NA	NA	NA	NA	NA	NA	NA	NA	NA
505	STAC	NA	NA	NA	NA	NA	3.00793	1.64024	3.64441	0.0562576	0.289929	2.41491	1.51237	4.32773	0.0374962	0.0583791	2.4148	1.51094	4.32726	0.0375066	0.100824	NA	NA	NA	NA	NA	NA	NA	NA	NA	NA	NA	NA	NA	NA	NA	NA	NA	NA	NA	NA	NA	NA	NA	NA	NA	NA	NA
506	ITGB1BP2	NA	NA	NA	NA	NA	0.991037	1.41944	0.409729	0.522107	1	2.41321	1.63522	5.13878	0.0233971	0.038194	2.4131	1.6338	5.1382	0.0234049	0.0660731	NA	NA	NA	NA	NA	NA	NA	NA	NA	NA	NA	NA	NA	NA	NA	NA	NA	NA	NA	NA	NA	NA	NA	NA	NA	NA	NA
507	TNFRSF21	0.302549	3.86254	0.111087	0.73891	0.854597	0.302673	3.86088	0.110664	0.739389	1	2.40841	2.41096	12.3371	0.000444047	0.00101991	2.40828	2.40954	12.3356	0.000444399	0.0017661	NA	NA	NA	NA	NA	NA	NA	NA	NA	NA	NA	NA	NA	NA	NA	NA	NA	NA	NA	NA	NA	NA	NA	NA	NA	NA	NA
508	TLE1	0.906731	5.96027	6.85039	0.00886221	0.0494048	0.906827	5.95864	6.85682	0.00883035	0.0806148	2.40672	6.17506	233.644	9.57e-53	2.5e-51	2.40659	6.17361	233.615	9.70654e-53	4.39257e-51	NA	NA	NA	NA	NA	NA	NA	NA	NA	NA	NA	NA	NA	NA	NA	NA	NA	NA	NA	NA	NA	NA	NA	NA	NA	NA	NA
509	CPA3	NA	NA	NA	NA	NA	1.87123	1.23901	0.952641	0.329048	0.846291	2.40009	1.7959	6.27547	0.0122421	0.021349	2.39997	1.79447	6.27474	0.0122471	0.0369585	NA	NA	NA	NA	NA	NA	NA	NA	NA	NA	NA	NA	NA	NA	NA	NA	NA	NA	NA	NA	NA	NA	NA	NA	NA	NA	NA
510	ISOC1	2.86781	5.26673	33.3163	7.83e-09	4.36e-07	2.86789	5.26511	33.0795	8.84682e-09	7.95571e-07	2.39973	5.14466	111.229	5.27e-26	6.16e-25	2.39959	5.14322	111.215	5.30846e-26	1.0741e-24	NA	NA	NA	NA	NA	NA	NA	NA	0.147686	0.618832	4.1902	4	0.98606	1.53004	1.55167	4	0.558731	420388	298	3.5	1.07075	1.91639	8	0.00805162	0.30801	1.78786	0.0737985
511	CCDC30	1.77988	2.16164	3.34309	0.0674878	0.199302	1.77993	2.16	3.32465	0.0682485	0.326696	2.39934	1.56402	4.61681	0.0316601	0.0501862	2.39923	1.5626	4.6163	0.0316695	0.086751	NA	NA	NA	NA	NA	NA	NA	NA	NA	NA	NA	NA	NA	NA	NA	NA	NA	NA	NA	NA	NA	NA	NA	NA	NA	NA	NA
512	NRDE2	2.68096	5.75291	42.8031	6.05e-11	5.56e-09	2.68106	5.75129	42.7148	6.33297e-11	9.51891e-09	2.39761	5.35481	129.359	5.66e-30	7.8e-29	2.39748	5.35336	129.343	5.70659e-30	1.36149e-28	NA	NA	NA	NA	NA	NA	NA	NA	NA	NA	NA	NA	NA	NA	NA	NA	NA	NA	NA	NA	NA	NA	NA	NA	NA	NA	NA
513	ATG14	2.06646	5.24985	27.879	1.29e-07	5.2e-06	2.06655	5.24822	27.6923	1.42225e-07	9.18048e-06	2.38632	4.83995	88.2884	5.66e-21	5.37e-20	2.38619	4.83851	88.2774	5.68903e-21	9.35999e-20	NA	NA	NA	NA	NA	NA	NA	NA	NA	NA	NA	NA	NA	NA	NA	NA	NA	NA	NA	NA	NA	NA	NA	NA	NA	NA	NA
514	CBX4	1.14406	5.50662	7.32422	0.00680313	0.0413102	1.14416	5.50499	7.29035	0.00693261	0.068554	2.38487	5.74333	169.686	8.66e-39	1.58e-37	2.38473	5.74187	169.665	8.75737e-39	2.76284e-37	NA	NA	NA	NA	-6.99899	0	0	1	NA	NA	NA	NA	NA	NA	NA	NA	NA	NA	NA	NA	NA	NA	NA	NA	NA	NA	NA
515	GKAP1	1.2517	2.02683	1.57267	0.20982	0.411669	1.2518	2.02519	1.56611	0.210773	0.659097	2.3795	1.96113	7.54453	0.00601924	0.0112008	2.37938	1.95971	7.54364	0.00602221	0.0193948	NA	NA	NA	NA	NA	NA	NA	NA	NA	NA	NA	NA	NA	NA	NA	NA	NA	NA	NA	NA	NA	NA	NA	NA	NA	NA	NA
516	FAM222A	2.07692	2.31752	5.20345	0.0225422	0.0967821	2.07702	2.31588	5.18188	0.0228236	0.159666	2.3794	2.38574	11.8258	0.000584143	0.00131587	2.37927	2.38432	11.8244	0.000584592	0.00227933	NA	NA	NA	NA	NA	NA	NA	NA	NA	NA	NA	NA	NA	NA	NA	NA	NA	NA	NA	NA	NA	NA	NA	NA	NA	NA	NA
517	SEC61A2	2.32739	4.74934	27.4466	1.61e-07	6.18e-06	2.32748	4.74772	27.3656	1.68404e-07	1.05155e-05	2.37659	4.8111	85.9354	1.86e-20	1.72e-19	2.37645	4.80965	85.9246	1.86929e-20	2.98674e-19	NA	NA	NA	NA	NA	NA	NA	NA	NA	NA	NA	NA	NA	NA	NA	NA	NA	NA	NA	NA	NA	NA	NA	NA	NA	NA	NA
518	FAM214A	2.08056	6.32799	26.5417	2.58e-07	9.34e-06	2.08067	6.32637	26.5777	2.53145e-07	1.50054e-05	2.37357	5.95621	196.091	1.49e-44	3.19e-43	2.37344	5.95476	196.066	1.50777e-44	5.58592e-43	NA	NA	NA	NA	NA	NA	NA	NA	NA	NA	NA	NA	NA	NA	NA	NA	NA	NA	NA	NA	NA	NA	NA	NA	NA	NA	NA
519	FAM160A1	2.39661	2.2617	6.13751	0.0132344	0.0659208	2.39668	2.26006	6.1091	0.0134488	0.109225	2.36659	1.67662	5.27711	0.0216075	0.0355399	2.36647	1.6752	5.27651	0.0216151	0.0614906	NA	NA	NA	NA	NA	NA	NA	NA	NA	NA	NA	NA	NA	NA	NA	NA	NA	NA	NA	NA	NA	NA	NA	NA	NA	NA	NA
520	CPEB2	1.73982	6.56068	8.08595	0.00446097	0.030615	1.73992	6.55906	8.07698	0.0044831	0.05026	2.36607	5.94227	193.269	6.15e-44	1.29e-42	2.36594	5.94081	193.244	6.22577e-44	2.26268e-42	NA	NA	NA	NA	NA	NA	NA	NA	NA	NA	NA	NA	NA	NA	NA	NA	NA	NA	NA	NA	NA	NA	NA	NA	NA	NA	NA
521	SDE2	2.35475	5.68497	38.9509	4.35e-10	3.35e-08	2.35485	5.68335	38.8402	4.5996e-10	5.79577e-08	2.36368	5.48199	138.873	4.7e-32	6.88e-31	2.36355	5.48054	138.856	4.7367e-32	1.20234e-30	NA	NA	NA	NA	NA	NA	NA	NA	NA	NA	NA	NA	5.75684	0	0	1	5.75684	255479	451	4	0	0	1	0.0268933	1.87783	3.05136	0.00227808
522	LTF	3.15471	1.6004	3.71544	0.0539114	0.172822	3.15465	1.59876	3.6856	0.0548842	0.285802	2.35943	1.90633	6.99154	0.00818958	0.0148065	2.35931	1.90491	6.99072	0.00819336	0.0256414	NA	NA	NA	NA	NA	NA	NA	NA	NA	NA	NA	NA	NA	NA	NA	NA	NA	NA	NA	NA	NA	NA	NA	NA	NA	NA	NA
523	NUDT11	2.53348	3.65355	18.3011	1.89e-05	0.000384404	2.53352	3.65191	18.1437	2.0485e-05	0.000672489	2.35895	4.04911	47.951	4.37e-12	2.38e-11	2.35882	4.04767	47.9449	4.38358e-12	4.12908e-11	NA	NA	NA	NA	2.39824	0.484832	0.202161	2	1.66081	0.0219569	0.0132206	2	1.20057	1.65662	1.37986	5	1.63885	535608	164	3.71429	1.06941	0.652535	7	-0.00337668	0.328737	4.99557	5.86608e-07
524	FBXL13	1.26713	1.66173	0.929063	0.335107	0.547277	1.26727	1.66009	0.919408	0.337631	0.85827	2.35436	1.60773	4.77162	0.0289326	0.0463158	2.35424	1.6063	4.77107	0.0289418	0.0801028	NA	NA	NA	NA	NA	NA	NA	NA	NA	NA	NA	NA	NA	NA	NA	NA	NA	NA	NA	NA	NA	NA	NA	NA	NA	NA	NA
525	PTP4A3	1.26416	1.86961	1.23913	0.265639	0.476417	1.26437	1.86797	1.23039	0.26733	0.755275	2.35274	2.17135	9.34882	0.00223129	0.00451421	2.35262	2.16993	9.34769	0.00223267	0.00781731	NA	NA	NA	NA	NA	NA	NA	NA	NA	NA	NA	NA	NA	NA	NA	NA	NA	NA	NA	NA	NA	NA	NA	NA	NA	NA	NA
526	RC3H1	1.61452	6.42146	18.8557	1.41e-05	0.000298722	1.61463	6.41983	18.8981	1.37892e-05	0.00048361	2.35196	6.27827	243.009	8.68e-55	2.37e-53	2.35183	6.27681	242.978	8.81889e-55	4.17025e-53	NA	NA	NA	NA	NA	NA	NA	NA	NA	NA	NA	NA	NA	NA	NA	NA	NA	NA	NA	NA	NA	NA	NA	NA	NA	NA	NA
527	KCNMB4	1.34389	3.75967	6.66248	0.00984639	0.0531017	1.34397	3.75803	6.61509	0.0101118	0.0887705	2.35191	4.02797	46.9748	7.19e-12	3.86e-11	2.35178	4.02653	46.9689	7.21229e-12	6.69172e-11	NA	NA	NA	NA	NA	NA	NA	NA	NA	NA	NA	NA	NA	NA	NA	NA	NA	NA	NA	NA	NA	NA	NA	NA	NA	NA	NA
528	C1orf52	2.27659	5.48968	34.4119	4.46e-09	2.63e-07	2.27669	5.48806	34.2519	4.84204e-09	4.6829e-07	2.33871	5.64735	153.974	2.35e-35	3.8e-34	2.33858	5.6459	153.954	2.36961e-35	6.6308e-34	NA	NA	NA	NA	NA	NA	NA	NA	NA	NA	NA	NA	NA	NA	NA	NA	NA	NA	NA	NA	NA	NA	NA	NA	NA	NA	NA
529	HIST2H2BF	2.14779	2.58095	7.20595	0.00726623	0.0433993	2.14789	2.57931	7.17069	0.00741044	0.0719935	2.33594	1.44802	3.73822	0.0531811	0.0797455	2.33584	1.44659	3.73781	0.0531943	0.13743	NA	NA	NA	NA	0.464284	1.22177	2.63151	97	0.023232	0.426657	18.365	26	-0.394624	0.491879	-1.24645	31	-0.226529	2.05767e+06	166	3.54386	0.679677	-3.0004	57	0.00600824	0.107	-2.17325	0.0297615
530	MAN1A1	2.18196	7.07581	19.7663	8.75e-06	0.000198853	2.18208	7.07418	19.7768	8.70326e-06	0.000325298	2.3318	6.88426	366.926	8.74e-82	3.66e-80	2.33166	6.8828	366.879	8.94973e-82	6.49411e-80	NA	NA	NA	NA	NA	NA	NA	NA	NA	NA	NA	NA	NA	NA	NA	NA	NA	NA	NA	NA	NA	NA	NA	NA	NA	NA	NA
531	ZBTB10	2.42451	5.89684	16.3528	5.26e-05	0.000911329	2.42463	5.89522	16.312	5.37232e-05	0.00151745	2.31752	5.58627	145.413	1.74e-33	2.64e-32	2.31739	5.58482	145.394	1.76091e-33	4.6203e-32	NA	NA	NA	NA	NA	NA	NA	NA	NA	NA	NA	NA	NA	NA	NA	NA	NA	NA	NA	NA	NA	NA	NA	NA	NA	NA	NA
532	DYNC2H1	1.59931	6.15421	4.32796	0.0374911	0.135518	1.59942	6.15257	4.32097	0.0376454	0.222146	2.31666	6.32274	245.261	2.8e-55	7.69e-54	2.31653	6.32128	245.229	2.84799e-55	1.35283e-53	NA	NA	NA	NA	NA	NA	NA	NA	NA	NA	NA	NA	NA	NA	NA	NA	NA	NA	NA	NA	NA	NA	NA	NA	NA	NA	NA
533	DLL1	0.577494	4.55431	0.739653	0.389772	0.597623	0.577608	4.55267	0.7378	0.390366	0.924	2.31317	3.65095	34.1406	5.13e-09	2.18e-08	2.31304	3.64951	34.1362	5.13863e-09	3.79012e-08	NA	NA	NA	NA	NA	NA	NA	NA	NA	NA	NA	NA	NA	NA	NA	NA	NA	NA	NA	NA	NA	NA	NA	NA	NA	NA	NA
534	RMND5A	1.59315	5.93708	8.38967	0.00377359	0.0270073	1.59326	5.93545	8.37633	0.0038014	0.0444652	2.31284	6.25195	232.73	1.51e-52	3.95e-51	2.3127	6.2505	232.7	1.53618e-52	6.93686e-51	NA	NA	NA	NA	NA	NA	NA	NA	NA	NA	NA	NA	NA	NA	NA	NA	NA	NA	NA	NA	NA	NA	NA	NA	NA	NA	NA
535	UBN2	1.25384	4.66056	9.25843	0.00234414	0.0187358	1.25394	4.65893	9.23484	0.00237453	0.0310692	2.31044	4.26517	54.856	1.3e-13	7.86e-13	2.31031	4.26372	54.8489	1.3016e-13	1.36266e-12	NA	NA	NA	NA	NA	NA	NA	NA	-4.08411	0	0	1	NA	NA	NA	NA	-4.08411	118886	1347	3	0	0	1	0.077589	1.88402	-2.20895	0.0271781
536	RRN3	2.52874	7.27814	37.7147	8.19e-10	5.88e-08	2.52885	7.27652	37.8016	7.83169e-10	9.29942e-08	2.30918	7.28298	477.049	9.37e-106	5.22e-104	2.30905	7.28152	476.988	9.66406e-106	9.32848e-104	NA	NA	NA	NA	NA	NA	NA	NA	NA	NA	NA	NA	NA	NA	NA	NA	NA	NA	NA	NA	NA	NA	NA	NA	NA	NA	NA
537	DAAM1	2.00662	4.65442	18.4092	1.78e-05	0.000366698	2.00671	4.65279	18.3487	1.83949e-05	0.000615999	2.30654	4.51247	65.9015	4.74e-16	3.35e-15	2.30641	4.51103	65.893	4.76072e-16	5.82441e-15	NA	NA	NA	NA	NA	NA	NA	NA	NA	NA	NA	NA	NA	NA	NA	NA	NA	NA	NA	NA	NA	NA	NA	NA	NA	NA	NA
538	ACVR1C	0.724848	2.55696	0.710087	0.399415	0.605264	0.724825	2.55531	0.703207	0.401708	0.937779	2.30413	1.89199	6.63721	0.00998704	0.0177319	2.30401	1.89057	6.63641	0.00999152	0.0307116	NA	NA	NA	NA	NA	NA	NA	NA	NA	NA	NA	NA	NA	NA	NA	NA	NA	NA	NA	NA	NA	NA	NA	NA	NA	NA	NA
539	FZD7	1.04629	4.95467	3.61708	0.0571892	0.179784	1.04638	4.95304	3.60282	0.0576817	0.294468	2.30325	5.2822	115.762	5.36e-27	6.55e-26	2.30312	5.28075	115.747	5.40029e-27	1.14209e-25	NA	NA	NA	NA	NA	NA	NA	NA	2.76133	0	0	1	NA	NA	NA	NA	2.76133	225168	574	3	0	0	1	0.0117757	2.01134	1.36702	0.171618
540	ADAMTSL3	1.29073	2.84231	1.93996	0.163673	0.353484	1.29079	2.84066	1.92143	0.1657	0.571703	2.3029	2.33472	10.7132	0.00106377	0.00228326	2.30278	2.33329	10.7118	0.00106453	0.00395304	NA	NA	NA	NA	NA	NA	NA	NA	NA	NA	NA	NA	NA	NA	NA	NA	NA	NA	NA	NA	NA	NA	NA	NA	NA	NA	NA
541	LRIG1	-0.0893333	5.83762	0.0158951	0.899672	0.948045	-0.0892738	5.83598	0.01583	0.899876	1	2.30056	5.3275	119.414	8.5e-28	1.07e-26	2.30043	5.32605	119.399	8.56527e-28	1.8639e-26	NA	NA	NA	NA	NA	NA	NA	NA	NA	NA	NA	NA	NA	NA	NA	NA	NA	NA	NA	NA	NA	NA	NA	NA	NA	NA	NA
542	BCL2L2-PABPN1	2.80436	5.94124	41.4083	1.24e-10	1.09e-08	2.80446	5.93963	41.3959	1.24315e-10	1.77956e-08	2.29836	5.19614	108.436	2.16e-25	2.46e-24	2.29823	5.1947	108.422	2.17237e-25	4.2883e-24	NA	NA	NA	NA	NA	NA	NA	NA	NA	NA	NA	NA	NA	NA	NA	NA	NA	NA	NA	NA	NA	NA	NA	NA	NA	NA	NA
543	CD55	1.86358	5.84731	12.2286	0.000470629	0.00546771	1.86369	5.84568	12.2041	0.000476837	0.00909223	2.29775	6.25076	230.332	5.04e-52	1.29e-50	2.29762	6.2493	230.303	5.12078e-52	2.26379e-50	NA	NA	NA	NA	NA	NA	NA	NA	1.69717	0	0	1	-0.171513	1.32581	-7.73009	2	1.1543	209367	551	3.66667	1.59725	1.38374	3	0.00649075	0.747887	1.53474	0.124849
544	ENAH	2.48465	8.21373	41.5816	1.13e-10	1.01e-08	2.48475	8.21212	41.7377	1.04379e-10	1.53598e-08	2.29596	8.29381	944.711	1.87e-207	2.68e-205	2.29583	8.29235	944.589	1.99031e-207	4.9273e-205	0.364447	0.564457	1.54881	10	0.498257	0.455238	0.913659	13	0.67956	1.0484	1.54277	24	0.108075	0.651897	6.03189	18	0.356615	1.44728e+06	570	3.42857	0.797235	2.23556	42	0.000211923	0.130664	2.72763	0.00637902
545	DIS3	2.51137	7.73133	36.7037	1.38e-09	9.13e-08	2.51148	7.72972	36.7977	1.31044e-09	1.43504e-07	2.29559	7.62653	599.151	2.56e-132	2.06e-130	2.29546	7.62507	599.073	2.66318e-132	3.71135e-130	0.0739113	0.0673329	0.910996	2	0.424292	0.470211	1.10823	4	1.25569	1.08792	0.86639	13	3.91389	4.26414	1.08949	18	1.76557	386360	958	3.58065	3.45698	1.958	31	-0.00375368	0.149729	11.8169	3.19422e-32
546	GLMN	2.24537	4.40248	17.5728	2.77e-05	0.000534778	2.24547	4.40084	17.5244	2.83646e-05	0.000897559	2.29052	4.59414	69.3313	8.32e-17	6.13e-16	2.29039	4.59269	69.3224	8.36164e-17	1.06639e-15	NA	NA	NA	NA	NA	NA	NA	NA	NA	NA	NA	NA	NA	NA	NA	NA	NA	NA	NA	NA	NA	NA	NA	NA	NA	NA	NA
547	L1CAM	-0.0293388	3.93899	0.000391677	0.98421	0.992467	-0.0291888	3.93733	0.000386341	0.984318	1	2.28361	1.7432	5.45479	0.0195148	0.0324312	2.28349	1.74177	5.45414	0.019522	0.0561282	NA	NA	NA	NA	NA	NA	NA	NA	NA	NA	NA	NA	NA	NA	NA	NA	NA	NA	NA	NA	NA	NA	NA	NA	NA	NA	NA
548	PKDCC	0.213478	2.57186	0.0918938	0.761783	0.867862	0.213593	2.57021	0.0915132	0.762262	1	2.2816	2.2744	9.94109	0.0016163	0.00336406	2.28147	2.27298	9.93985	0.00161739	0.00582687	NA	NA	NA	NA	NA	NA	NA	NA	NA	NA	NA	NA	NA	NA	NA	NA	NA	NA	NA	NA	NA	NA	NA	NA	NA	NA	NA
549	STX11	1.61164	2.0645	2.4898	0.114586	0.281347	1.61166	2.06286	2.47575	0.115614	0.457307	2.27625	2.7775	16.0079	6.31e-05	0.000166171	2.27612	2.77607	16.0059	6.31457e-05	0.000287863	NA	NA	NA	NA	NA	NA	NA	NA	NA	NA	NA	NA	NA	NA	NA	NA	NA	NA	NA	NA	NA	NA	NA	NA	NA	NA	NA
550	SLC25A33	1.99114	3.42975	7.39325	0.00654691	0.0402292	1.99123	3.42811	7.34966	0.00670756	0.0672449	2.27542	3.98107	43.1539	5.06e-11	2.55e-10	2.27529	3.97964	43.1483	5.0743e-11	4.42331e-10	NA	NA	NA	NA	NA	NA	NA	NA	0.858805	0	0	1	NA	NA	NA	NA	0.858805	296175	321	3	0	0	1	0.0906251	2.29476	0.334754	0.737811
551	FAM184A	1.88668	1.75779	2.21767	0.136438	0.315551	1.88662	1.75615	2.20336	0.13771	0.511532	2.27069	1.50804	3.91858	0.0477553	0.0724044	2.27058	1.50661	3.91812	0.0477681	0.124821	NA	NA	NA	NA	NA	NA	NA	NA	NA	NA	NA	NA	NA	NA	NA	NA	NA	NA	NA	NA	NA	NA	NA	NA	NA	NA	NA
552	CHORDC1	2.74261	6.69006	50.2785	1.33e-12	1.56e-10	2.74272	6.68844	50.4049	1.2508e-12	2.39278e-10	2.2683	6.8218	337.245	2.54e-75	9.65e-74	2.26817	6.82035	337.201	2.59751e-75	1.7081e-73	-0.24034	0	0	1	0.166292	0.43778	2.63259	2	0.148789	1.04725	7.03851	16	0.441616	1.10222	2.49587	10	0.206524	1.11801e+06	332	3.38462	1.08727	5.26464	26	-0.00738184	0.155376	1.3767	0.168606
553	DENND2C	4.17837	5.10636	41.1075	1.44e-10	1.24e-08	4.17847	5.10474	40.9658	1.54914e-10	2.17324e-08	2.2673	5.19014	105.773	8.27e-25	9.22e-24	2.26717	5.18869	105.759	8.32573e-25	1.60732e-23	NA	NA	NA	NA	NA	NA	NA	NA	NA	NA	NA	NA	NA	NA	NA	NA	NA	NA	NA	NA	NA	NA	NA	NA	NA	NA	NA
554	TMEM185A	2.4744	6.13197	27.7956	1.35e-07	5.37e-06	2.4745	6.13035	27.8043	1.34228e-07	8.85445e-06	2.26098	5.90848	176.469	2.86e-40	5.45e-39	2.26084	5.90702	176.446	2.89385e-40	9.53668e-39	NA	NA	NA	NA	NA	NA	NA	NA	NA	NA	NA	NA	NA	NA	NA	NA	NA	NA	NA	NA	NA	NA	NA	NA	NA	NA	NA
555	EPB41	1.16921	2.28331	1.87279	0.171156	0.363327	1.16929	2.28167	1.86486	0.172065	0.584653	2.25981	1.40571	3.32596	0.0681943	0.0997356	2.25971	1.40429	3.32558	0.0682098	0.17163	NA	NA	NA	NA	NA	NA	NA	NA	0.026007	0	0	1	NA	NA	NA	NA	0.026007	936661	864	3	0	0	1	0.139994	1.7526	-0.0650385	0.948143
556	SNIP1	2.3105	5.96399	34.8034	3.65e-09	2.22e-07	2.3106	5.96236	34.8223	3.61216e-09	3.67201e-07	2.25934	5.99532	187.482	1.13e-42	2.29e-41	2.25921	5.99387	187.457	1.14111e-42	4.02892e-41	NA	NA	NA	NA	NA	NA	NA	NA	2.96276	1.3905	0.469325	2	1.75751	0.892277	0.507694	3	1.75751	473183	396	3.6	1.55309	0.883687	5	-0.00839454	0.454083	3.88895	0.00010068
557	NRBF2	1.91614	6.10641	29.0034	7.23e-08	3.12e-06	1.91624	6.10479	29.0721	6.97341e-08	4.95748e-06	2.25511	6.04725	193.954	4.36e-44	9.19e-43	2.25498	6.04579	193.929	4.41323e-44	1.61229e-42	NA	NA	NA	NA	NA	NA	NA	NA	1.10152	0	0	1	0.651316	1.38575	2.12761	3	0.876419	195906	287	3.75	1.03053	1.17584	4	0.03623	0.645415	1.30178	0.192991
558	RGPD6	1.67918	6.26589	20.6684	5.46e-06	0.000133527	1.67928	6.26426	20.7119	5.33844e-06	0.000214383	2.25463	5.84951	168.471	1.6e-38	2.88e-37	2.2545	5.84806	168.449	1.61409e-38	5.03935e-37	NA	NA	NA	NA	NA	NA	NA	NA	NA	NA	NA	NA	NA	NA	NA	NA	NA	NA	NA	NA	NA	NA	NA	NA	NA	NA	NA
559	GCC1	1.74241	6.02416	21.0614	4.45e-06	0.000111946	1.74251	6.02254	21.0865	4.39013e-06	0.000181854	2.25314	5.77827	159.979	1.14e-36	1.96e-35	2.25301	5.77681	159.958	1.1559e-36	3.42587e-35	NA	NA	NA	NA	NA	NA	NA	NA	NA	NA	NA	NA	-1.84143	2.60632	-1.41538	2	-1.84143	70146.4	775	4	2.60632	-1.41538	2	0.0742061	1.43158	-1.33813	0.180856
560	KHDC1	1.85028	2.95949	6.56671	0.0103904	0.0551511	1.85044	2.95785	6.52303	0.0106486	0.0919866	2.25234	3.30365	24.7708	6.46e-07	2.21e-06	2.25221	3.30222	24.7676	6.46759e-07	3.83157e-06	NA	NA	NA	NA	NA	NA	NA	NA	NA	NA	NA	NA	NA	NA	NA	NA	NA	NA	NA	NA	NA	NA	NA	NA	NA	NA	NA
561	TFB2M	2.39797	5.16172	29.1312	6.76e-08	2.95e-06	2.39806	5.1601	28.9753	7.33081e-08	5.19401e-06	2.25064	5.46666	127.762	1.27e-29	1.72e-28	2.25051	5.46521	127.746	1.2759e-29	3.00659e-28	NA	NA	NA	NA	NA	NA	NA	NA	NA	NA	NA	NA	NA	NA	NA	NA	NA	NA	NA	NA	NA	NA	NA	NA	NA	NA	NA
562	PIM3	1.16641	4.78049	9.4107	0.00215722	0.0175927	1.16651	4.77886	9.38223	0.00219099	0.0291804	2.24841	4.72284	74.196	7.07e-18	5.62e-17	2.24828	4.72139	74.1863	7.10826e-18	9.77003e-17	NA	NA	NA	NA	NA	NA	NA	NA	NA	NA	NA	NA	NA	NA	NA	NA	NA	NA	NA	NA	NA	NA	NA	NA	NA	NA	NA
563	TSC22D2	2.20979	6.5857	35.5798	2.45e-09	1.57e-07	2.20989	6.58408	35.6651	2.3433e-09	2.4655e-07	2.24795	6.44177	254.993	2.12e-57	6.13e-56	2.24781	6.44031	254.959	2.15447e-57	1.07944e-55	NA	NA	NA	NA	NA	NA	NA	NA	NA	NA	NA	NA	0.112053	2.8773	25.6781	3	0.112053	385460	780	4	2.8773	25.6781	3	0.0271794	0.649345	0.130706	0.896008
564	PRPF18	2.39261	5.928	31.1479	2.39e-08	1.17e-06	2.39271	5.92637	31.1375	2.40383e-08	1.92334e-06	2.24591	5.95406	180.435	3.9e-41	7.56e-40	2.24578	5.95261	180.411	3.94185e-41	1.32505e-39	NA	NA	NA	NA	NA	NA	NA	NA	2.02952	0	0	1	5.24468	0	0	1	3.6371	1.29523e+06	342	3.5	1.60758	0.441995	2	0.0828311	1.35044	2.63193	0.00849006
565	KCTD12	0.64851	8.40573	0.364063	0.546258	0.725393	0.648671	8.40407	0.363523	0.546556	1	2.24583	7.74373	628.387	1.12e-138	1e-136	2.24569	7.74227	628.304	1.16837e-138	1.8078e-136	0.177737	0.157624	0.886838	7	1.0935	0.464647	0.424918	10	1.0382	0.884688	0.852135	29	1.28978	2.03089	1.5746	41	1.10515	413207	325	3.58571	1.8423	1.66702	70	-0.00806291	0.0975636	11.4101	3.72311e-30
566	AQP3	1.8721	5.55083	2.1308	0.144365	0.326535	1.87225	5.54919	2.12362	0.145043	0.52787	2.23876	4.88575	83.1243	7.71e-20	6.91e-19	2.23862	4.8843	83.1133	7.74817e-20	1.20062e-18	NA	NA	NA	NA	NA	NA	NA	NA	NA	NA	NA	NA	NA	NA	NA	NA	NA	NA	NA	NA	NA	NA	NA	NA	NA	NA	NA
567	ZNF468	1.89295	5.06711	23.4023	1.31e-06	3.93e-05	1.89304	5.06548	23.2785	1.40155e-06	6.81128e-05	2.23612	4.99959	90.1881	2.17e-21	2.11e-20	2.23598	4.99814	90.1762	2.17869e-21	3.66476e-20	NA	NA	NA	NA	NA	NA	NA	NA	NA	NA	NA	NA	NA	NA	NA	NA	NA	NA	NA	NA	NA	NA	NA	NA	NA	NA	NA
568	GCLC	1.45905	4.01456	3.52362	0.0605002	0.185658	1.45915	4.01292	3.5079	0.0610767	0.304775	2.23511	4.35213	55.7682	8.15e-14	5e-13	2.23497	4.35069	55.7608	8.18455e-14	8.6852e-13	NA	NA	NA	NA	NA	NA	NA	NA	-0.27	0	0	1	NA	NA	NA	NA	-0.27	167400	637	3	0	0	1	0.121699	1.86341	-0.210205	0.833507
569	ADAT3	1.67254	2.81066	5.55414	0.0184371	0.0834926	1.67264	2.80902	5.5204	0.018796	0.138635	2.23405	2.88229	17.0936	3.56e-05	9.7e-05	2.23392	2.88086	17.0914	3.56231e-05	0.000168038	NA	NA	NA	NA	NA	NA	NA	NA	NA	NA	NA	NA	NA	NA	NA	NA	NA	NA	NA	NA	NA	NA	NA	NA	NA	NA	NA
570	LSG1	2.68379	6.64557	44.4408	2.62e-11	2.55e-09	2.6839	6.64395	44.532	2.50238e-11	4.05059e-09	2.23034	6.49926	262.369	5.23e-59	1.55e-57	2.2302	6.4978	262.334	5.31748e-59	2.71592e-57	NA	NA	NA	NA	NA	NA	NA	NA	NA	NA	NA	NA	0.0749771	0.624607	8.33064	5	0.0749771	515554	658	4	0.624607	8.33064	5	0.0162998	0.487269	0.120421	0.90415
571	ZMYM5	1.29018	4.81638	11.588	0.000663797	0.00718749	1.29028	4.81475	11.5503	0.000677373	0.0120084	2.22746	4.78228	76.4509	2.26e-18	1.84e-17	2.22733	4.78084	76.4408	2.26916e-18	3.19397e-17	NA	NA	NA	NA	NA	NA	NA	NA	NA	NA	NA	NA	NA	NA	NA	NA	NA	NA	NA	NA	NA	NA	NA	NA	NA	NA	NA
572	PCDH9	1.24804	7.41927	1.94469	0.16316	0.352791	1.24819	7.41762	1.94146	0.16351	0.567591	2.22741	7.61519	568.236	1.36e-125	9.66e-124	2.22727	7.61373	568.16	1.41099e-125	1.73635e-123	NA	NA	NA	NA	NA	NA	NA	NA	3.5562	0	0	1	5.33639	1.37532	0.257725	2	3.96107	133546	1237	3.66667	1.57775	0.398316	3	0.0528629	0.76232	5.12672	2.94826e-07
573	FNBP4	1.55548	6.85063	18.3426	1.85e-05	0.000377312	1.55559	6.84901	18.3896	1.80036e-05	0.00060616	2.22705	7.12041	403.822	8.11e-90	3.72e-88	2.22692	7.11895	403.769	8.32763e-90	6.63781e-88	NA	NA	NA	NA	NA	NA	NA	NA	0.600788	0	0	1	1.11046	0	0	1	0.855623	232723	1019	3.5	0.254835	0.297835	2	0.0526887	1.48306	0.541403	0.58823
574	CELSR1	1.47029	1.53535	1.01988	0.312547	0.524692	1.47042	1.53371	1.01159	0.314521	0.825676	2.22637	1.31211	2.78634	0.0950709	0.13344	2.22627	1.31069	2.78604	0.0950889	0.229021	NA	NA	NA	NA	NA	NA	NA	NA	NA	NA	NA	NA	NA	NA	NA	NA	NA	NA	NA	NA	NA	NA	NA	NA	NA	NA	NA
575	KATNA1	2.39958	5.74667	39.0725	4.08e-10	3.2e-08	2.39968	5.74504	38.9949	4.24909e-10	5.4623e-08	2.22607	5.75048	154.03	2.28e-35	3.7e-34	2.22593	5.74903	154.01	2.30457e-35	6.47465e-34	NA	NA	NA	NA	NA	NA	NA	NA	NA	NA	NA	NA	NA	NA	NA	NA	NA	NA	NA	NA	NA	NA	NA	NA	NA	NA	NA
576	PPM1B	1.94173	6.3816	29.2817	6.26e-08	2.74e-06	1.94183	6.37998	29.3606	6.00874e-08	4.34508e-06	2.22586	6.45801	254.111	3.3e-57	9.5e-56	2.22572	6.45656	254.077	3.35399e-57	1.67247e-55	-1.01635	0	0	1	NA	NA	NA	NA	NA	NA	NA	NA	2.26957	0	0	1	2.26957	59006.3	479	4	0	0	1	0.130479	1.99494	1.07226	0.283605
577	FASTKD5	1.81314	5.86062	20.7733	5.17e-06	0.000127376	1.81325	5.85899	20.7555	5.21814e-06	0.000209953	2.22478	5.93931	176.053	3.53e-40	6.68e-39	2.22465	5.93785	176.03	3.56758e-40	1.16936e-38	NA	NA	NA	NA	NA	NA	NA	NA	NA	NA	NA	NA	NA	NA	NA	NA	NA	NA	NA	NA	NA	NA	NA	NA	NA	NA	NA
578	IRF7	-0.874725	6.52127	0.944125	0.331219	0.543759	-0.874633	6.51963	0.941831	0.331807	0.850557	2.22349	4.72897	73.3023	1.11e-17	8.7e-17	2.22335	4.72752	73.2926	1.11784e-17	1.51564e-16	NA	NA	NA	NA	NA	NA	NA	NA	NA	NA	NA	NA	NA	NA	NA	NA	NA	NA	NA	NA	NA	NA	NA	NA	NA	NA	NA
579	BCL2L11	0.254116	4.15555	0.0674968	0.795017	0.887716	0.254249	4.1539	0.0673225	0.795276	1	2.22189	3.67335	32.7364	1.06e-08	4.36e-08	2.22176	3.67191	32.7321	1.05775e-08	7.56051e-08	NA	NA	NA	NA	NA	NA	NA	NA	NA	NA	NA	NA	NA	NA	NA	NA	NA	NA	NA	NA	NA	NA	NA	NA	NA	NA	NA
580	OTUD3	2.65233	3.029	12.6875	0.000368106	0.00443278	2.65246	3.02737	12.6139	0.000382897	0.00750913	2.22187	2.77043	15.3423	8.97e-05	0.00023108	2.22175	2.769	15.3404	8.97779e-05	0.000400168	NA	NA	NA	NA	NA	NA	NA	NA	NA	NA	NA	NA	NA	NA	NA	NA	NA	NA	NA	NA	NA	NA	NA	NA	NA	NA	NA
581	PDRG1	1.96994	5.02731	25.1672	5.26e-07	1.72e-05	1.97004	5.02569	25.0458	5.59846e-07	2.99767e-05	2.21331	5.28098	108.981	1.64e-25	1.88e-24	2.21318	5.27953	108.967	1.65026e-25	3.27608e-24	NA	NA	NA	NA	0.300522	0	0	1	NA	NA	NA	NA	NA	NA	NA	NA	NA	NA	NA	NA	NA	NA	NA	NA	NA	NA	NA
582	HNRNPF	2.73857	9.21797	27.1444	1.89e-07	7.02e-06	2.73869	9.21635	27.1682	1.86505e-07	1.14088e-05	2.21313	9.25182	1352.59	4.21e-296	9.66e-294	2.213	9.25036	1354.11	1.97255e-296	8.13891e-294	-0.0405231	0.851968	-21.0242	13	-0.0981396	0.972364	-9.90797	10	0.465573	0.976978	2.09844	34	0.349606	2.01388	5.76044	62	0.442477	945862	415	3.64583	1.61762	3.65583	96	0.00102243	0.0782573	5.64107	1.68998e-08
583	C11orf96	NA	NA	NA	NA	NA	-2.41548	1.81691	2.7188	0.0991727	0.415798	2.21028	1.42755	3.32574	0.0682032	0.0997365	2.21017	1.42612	3.32536	0.0682191	0.171632	NA	NA	NA	NA	NA	NA	NA	NA	NA	NA	NA	NA	NA	NA	NA	NA	NA	NA	NA	NA	NA	NA	NA	NA	NA	NA	NA
584	RPA4	2.54377	1.37441	1.98256	0.159121	0.346447	2.54387	1.37276	1.97271	0.160161	0.558824	2.20792	1.37751	3.0656	0.0799655	0.114553	2.20782	1.37609	3.06526	0.0799826	0.196759	NA	NA	NA	NA	NA	NA	NA	NA	NA	NA	NA	NA	NA	NA	NA	NA	NA	NA	NA	NA	NA	NA	NA	NA	NA	NA	NA
585	BORA	2.92359	4.68518	22.551	2.05e-06	5.68e-05	2.92369	4.68355	22.4997	2.1018e-06	9.53191e-05	2.20665	5.33485	112.786	2.4e-26	2.86e-25	2.20652	5.3334	112.771	2.42147e-26	4.98093e-25	NA	NA	NA	NA	NA	NA	NA	NA	NA	NA	NA	NA	NA	NA	NA	NA	NA	NA	NA	NA	NA	NA	NA	NA	NA	NA	NA
586	ZFAND2A	1.25361	4.41233	8.6648	0.00324416	0.0243426	1.25371	4.41069	8.64403	0.00328136	0.0400985	2.20459	4.78466	75.4003	3.84e-18	3.1e-17	2.20446	4.78321	75.3902	3.86298e-18	5.3905e-17	NA	NA	NA	NA	NA	NA	NA	NA	NA	NA	NA	NA	NA	NA	NA	NA	NA	NA	NA	NA	NA	NA	NA	NA	NA	NA	NA
587	DFNB31	0.531601	2.92284	0.480524	0.488185	0.68134	0.531699	2.9212	0.476902	0.489829	1	2.2042	2.05844	7.50627	0.00614846	0.0114168	2.20408	2.05701	7.50532	0.0061517	0.0197753	NA	NA	NA	NA	NA	NA	NA	NA	NA	NA	NA	NA	NA	NA	NA	NA	NA	NA	NA	NA	NA	NA	NA	NA	NA	NA	NA
588	DYNLL2	1.78752	7.37837	20.4656	6.07e-06	0.000147323	1.78762	7.37674	20.5152	5.91584e-06	0.000235325	2.20344	7.5999	553.227	2.5e-122	1.71e-120	2.2033	7.59844	553.153	2.59524e-122	3.06808e-120	-0.122427	0.0188905	-0.154299	2	-0.175232	0.676691	-3.86168	5	-3.12788	0	0	1	NA	NA	NA	NA	-3.12788	85029.8	89	3	0	0	1	0.0637652	2.02715	-1.57445	0.115384
589	CYB5R4	2.29914	5.58212	34.0036	5.5e-09	3.17e-07	2.29924	5.5805	33.8769	5.87104e-09	5.51537e-07	2.20203	5.41841	119.415	8.49e-28	1.07e-26	2.2019	5.41696	119.399	8.56272e-28	1.8639e-26	NA	NA	NA	NA	NA	NA	NA	NA	NA	NA	NA	NA	NA	NA	NA	NA	NA	NA	NA	NA	NA	NA	NA	NA	NA	NA	NA
590	SRP19	2.08794	6.0442	28.4189	9.77e-08	4.11e-06	2.08804	6.04258	28.4521	9.60445e-08	6.60478e-06	2.20165	6.09644	193.701	4.95e-44	1.04e-42	2.20152	6.09499	193.675	5.01427e-44	1.82869e-42	-0.106765	0.364502	-3.41405	4	0.833371	0.181865	0.218228	6	0.513557	0.419266	0.816395	17	0.638431	1.89458	2.96755	12	0.513557	143930	144	3.41379	0.669404	1.30346	29	-0.00179161	0.144458	3.56747	0.000360445
591	ADPGK	2.42344	7.61297	33.1954	8.33e-09	4.58e-07	2.42352	7.61136	33.266	8.03776e-09	7.29045e-07	2.19981	7.58677	546.892	5.97e-121	4.03e-119	2.19967	7.58531	546.819	6.194e-121	7.24113e-119	-0.346337	0	0	1	NA	NA	NA	NA	0.616766	0.645842	1.04714	5	2.43346	2.46076	1.01122	4	1.11556	219486	497	3.44444	1.52956	1.37112	9	0.0116217	0.296673	3.72105	0.000198397
592	ZCCHC10	2.40739	5.02425	30.7898	2.88e-08	1.37e-06	2.40749	5.02262	30.6552	3.08207e-08	2.34985e-06	2.19679	5.17629	99.8728	1.63e-23	1.74e-22	2.19665	5.17484	99.8595	1.63604e-23	3.03324e-22	NA	NA	NA	NA	NA	NA	NA	NA	0.226101	0	0	1	5.78413	0	0	1	3.00511	356732	192	3.5	2.77901	0.924761	2	0.10727	1.40674	2.05996	0.0394019
593	STK3	2.53686	5.80668	34.0156	5.47e-09	3.17e-07	2.53696	5.80506	33.9548	5.64061e-09	5.37083e-07	2.19463	6.09336	192.339	9.81e-44	2.06e-42	2.1945	6.09191	192.313	9.94017e-44	3.60019e-42	NA	NA	NA	NA	NA	NA	NA	NA	NA	NA	NA	NA	NA	NA	NA	NA	NA	NA	NA	NA	NA	NA	NA	NA	NA	NA	NA
594	RSRC2	1.95468	7.19434	27.4625	1.6e-07	6.15e-06	1.95477	7.19272	27.5414	1.53771e-07	9.70429e-06	2.18313	7.46177	496.016	7e-110	4.09e-108	2.183	7.46031	495.949	7.23365e-110	7.35351e-108	NA	NA	NA	NA	NA	NA	NA	NA	NA	NA	NA	NA	NA	NA	NA	NA	NA	NA	NA	NA	NA	NA	NA	NA	NA	NA	NA
595	ZFYVE1	1.41244	6.50919	16.9763	3.78e-05	0.000694391	1.41254	6.50756	17.0255	3.68807e-05	0.00112492	2.18105	6.6405	280.053	7.31e-63	2.31e-61	2.18092	6.63905	280.015	7.45227e-63	4.0732e-61	NA	NA	NA	NA	-3.28799	0	0	1	0.178214	0	0	1	NA	NA	NA	NA	0.178214	311002	789	3	0	0	1	0.206227	2.10675	-0.0132966	0.989391
596	IER2	1.80867	6.38722	13.9478	0.000187961	0.00260773	1.80875	6.3856	13.9459	0.000188152	0.00428958	2.18054	6.83127	319.883	1.54e-71	5.51e-70	2.18041	6.82982	319.84	1.56933e-71	9.74143e-70	NA	NA	NA	NA	NA	NA	NA	NA	NA	NA	NA	NA	NA	NA	NA	NA	NA	NA	NA	NA	NA	NA	NA	NA	NA	NA	NA
597	ELOF1	2.22601	6.21382	37.3474	9.89e-10	6.87e-08	2.22611	6.2122	37.4382	9.43572e-10	1.085e-07	2.17471	6.25189	212.189	4.57e-48	1.09e-46	2.17457	6.25044	212.16	4.64035e-48	1.90717e-46	NA	NA	NA	NA	NA	NA	NA	NA	NA	NA	NA	NA	NA	NA	NA	NA	NA	NA	NA	NA	NA	NA	NA	NA	NA	NA	NA
598	KPNA2	3.08411	8.92946	26.0268	3.37e-07	1.15e-05	3.08423	8.92784	26.027	3.36676e-07	1.89938e-05	2.17453	9.78681	1759.34	0	0	2.1744	9.78535	1767.17	0	0	3.19536	5.06366	1.58469	4	NA	NA	NA	NA	2.32984	1.21595	0.521903	94	2.57821	2.72067	1.05526	86	2.37676	1.2747e+06	529	3.47778	1.54061	0.648195	180	0.00188482	0.0592672	40.0707	0
599	FSD1L	1.38022	2.96804	3.61179	0.0573715	0.179965	1.38038	2.9664	3.58981	0.058135	0.296207	2.17421	2.96052	17.5645	2.78e-05	7.72e-05	2.17408	2.95909	17.5621	2.78069e-05	0.000133685	NA	NA	NA	NA	NA	NA	NA	NA	NA	NA	NA	NA	NA	NA	NA	NA	NA	NA	NA	NA	NA	NA	NA	NA	NA	NA	NA
600	SBNO1	2.38346	7.783	23.3258	1.37e-06	4.06e-05	2.38358	7.78138	23.3483	1.35164e-06	6.58391e-05	2.16923	7.65153	559.643	1.01e-123	6.9e-122	2.16909	7.65007	559.567	1.04442e-123	1.24873e-121	NA	NA	NA	NA	NA	NA	NA	NA	2.04463	2.35646	1.15251	3	NA	NA	NA	NA	2.04463	160566	1393	3	2.35646	1.15251	3	0.015726	0.91394	2.21995	0.0264221
601	CPEB3	1.76853	3.33091	9.25029	0.00235458	0.0187972	1.7686	3.32927	9.18167	0.0024445	0.0317725	2.16664	3.18069	21.089	4.38e-06	1.36e-05	2.16651	3.17926	21.0861	4.39094e-06	2.3529e-05	NA	NA	NA	NA	NA	NA	NA	NA	NA	NA	NA	NA	NA	NA	NA	NA	NA	NA	NA	NA	NA	NA	NA	NA	NA	NA	NA
602	TRIM23	2.28145	6.43947	34.1726	5.04e-09	2.96e-07	2.28155	6.43784	34.2392	4.87362e-09	4.6829e-07	2.16349	6.21314	204.82	1.85e-46	4.22e-45	2.16335	6.21168	204.793	1.87946e-46	7.40628e-45	NA	NA	NA	NA	NA	NA	NA	NA	NA	NA	NA	NA	2.80078	0	0	1	2.80078	89101.9	574	4	0	0	1	0.167481	2.05623	1.28065	0.200318
603	FGD6	2.85095	4.40373	35.3984	2.69e-09	1.7e-07	2.85104	4.4021	35.3055	2.81838e-09	2.92153e-07	2.15903	4.03213	41.477	1.19e-10	5.84e-10	2.15889	4.03069	41.4713	1.19611e-10	1.0145e-09	NA	NA	NA	NA	NA	NA	NA	NA	NA	NA	NA	NA	NA	NA	NA	NA	NA	NA	NA	NA	NA	NA	NA	NA	NA	NA	NA
604	RP1-177G6.2	NA	NA	NA	NA	NA	2.47934	1.35763	1.85219	0.173529	0.588297	2.15713	1.3861	2.99665	0.0834369	0.118923	2.15702	1.38468	2.9963	0.0834548	0.204297	NA	NA	NA	NA	NA	NA	NA	NA	NA	NA	NA	NA	NA	NA	NA	NA	NA	NA	NA	NA	NA	NA	NA	NA	NA	NA	NA
605	PLEKHA5	1.49546	5.41695	7.60948	0.00580624	0.0368943	1.49557	5.41531	7.5732	0.00592425	0.0614109	2.15476	5.05971	89.0877	3.78e-21	3.61e-20	2.15463	5.05827	89.0756	3.80014e-21	6.2916e-20	NA	NA	NA	NA	NA	NA	NA	NA	NA	NA	NA	NA	NA	NA	NA	NA	NA	NA	NA	NA	NA	NA	NA	NA	NA	NA	NA
606	GPR137C	2.97161	3.50136	22.4896	2.11e-06	5.84e-05	2.97171	3.49972	22.3074	2.32305e-06	0.000104008	2.15379	4.42965	55.8856	7.68e-14	4.73e-13	2.15366	4.42821	55.878	7.71109e-14	8.20761e-13	NA	NA	NA	NA	NA	NA	NA	NA	NA	NA	NA	NA	NA	NA	NA	NA	NA	NA	NA	NA	NA	NA	NA	NA	NA	NA	NA
607	MBIP	2.01436	5.0959	27.0465	1.99e-07	7.32e-06	2.01446	5.09427	26.8988	2.14391e-07	1.28898e-05	2.15292	5.19184	97.9473	4.3e-23	4.52e-22	2.15279	5.19039	97.9339	4.32576e-23	7.88113e-22	NA	NA	NA	NA	NA	NA	NA	NA	NA	NA	NA	NA	NA	NA	NA	NA	NA	NA	NA	NA	NA	NA	NA	NA	NA	NA	NA
608	ATP11B	2.44079	7.90195	33.9661	5.61e-09	3.22e-07	2.4409	7.90034	34.0542	5.35971e-09	5.12656e-07	2.14717	8.06014	728.487	1.91e-160	1.99e-158	2.14704	8.05868	728.387	2.00851e-160	3.6124e-158	NA	NA	NA	NA	NA	NA	NA	NA	-8.35463	0	0	1	NA	NA	NA	NA	-8.35463	1.07725e+06	1177	3	0	0	1	0.0672588	1.93661	-4.34878	1.36896e-05
609	ZNF721	2.06303	5.96239	24.3641	7.97e-07	2.48e-05	2.06313	5.96076	24.3653	7.96933e-07	4.09021e-05	2.14566	5.83186	154.339	1.95e-35	3.18e-34	2.14553	5.83041	154.318	1.97384e-35	5.56032e-34	NA	NA	NA	NA	NA	NA	NA	NA	NA	NA	NA	NA	NA	NA	NA	NA	NA	NA	NA	NA	NA	NA	NA	NA	NA	NA	NA
610	BAZ1A	1.55759	6.5062	14.2954	0.000156249	0.00225535	1.5577	6.50457	14.3132	0.000154776	0.00367602	2.14528	7.03433	359.337	3.93e-80	1.62e-78	2.14515	7.03287	359.288	4.02319e-80	2.87959e-78	NA	NA	NA	NA	NA	NA	NA	NA	5.93948	0	0	1	NA	NA	NA	NA	5.93948	282851	1556	3	0	0	1	0.154222	1.9796	2.92244	0.00347301
611	DNTTIP2	2.13144	7.05545	22.773	1.82e-06	5.13e-05	2.13155	7.05383	22.7991	1.79847e-06	8.35433e-05	2.14415	7.14002	386.318	5.24e-86	2.3e-84	2.14402	7.13856	386.265	5.3829e-86	4.08926e-84	-0.341565	0	0	1	0.546581	0	0	1	1.21575	1.17214	0.964126	10	0.794795	0.729961	0.918427	10	0.947784	415687	756	3.5	0.949581	1.0019	20	-0.00769421	0.185799	5.14253	2.71069e-07
612	KDM5A	1.60759	7.97383	13.9247	0.000190279	0.00263138	1.6077	7.9722	13.9519	0.000187547	0.00428958	2.12906	7.71498	567.973	1.55e-125	1.1e-123	2.12893	7.71352	567.895	1.61177e-125	1.97189e-123	NA	NA	NA	NA	NA	NA	NA	NA	NA	NA	NA	NA	NA	NA	NA	NA	NA	NA	NA	NA	NA	NA	NA	NA	NA	NA	NA
613	AKAP6	1.56726	2.68193	4.28597	0.0384281	0.137897	1.56738	2.68029	4.25807	0.0390644	0.227773	2.12369	1.77007	5.04932	0.0246357	0.0400169	2.12357	1.76864	5.04867	0.0246448	0.0692574	NA	NA	NA	NA	NA	NA	NA	NA	NA	NA	NA	NA	NA	NA	NA	NA	NA	NA	NA	NA	NA	NA	NA	NA	NA	NA	NA
614	ICAM5	-1.3948	3.37968	0.955926	0.328215	0.540752	-1.39476	3.37804	0.952129	0.329178	0.846291	2.12281	2.99539	17.4559	2.94e-05	8.14e-05	2.12268	2.99396	17.4536	2.9441e-05	0.000141026	NA	NA	NA	NA	NA	NA	NA	NA	NA	NA	NA	NA	-8.47784	0	0	1	-8.47784	404479	924	4	0	0	1	0.133592	1.98279	-4.34308	1.405e-05
615	PDSS1	3.355	3.97721	26.5349	2.59e-07	9.35e-06	3.35511	3.97558	26.4029	2.77119e-07	1.61089e-05	2.12227	3.9551	38.0629	6.85e-10	3.15e-09	2.12214	3.95366	38.0577	6.8683e-10	5.47047e-09	NA	NA	NA	NA	NA	NA	NA	NA	NA	NA	NA	NA	NA	NA	NA	NA	NA	NA	NA	NA	NA	NA	NA	NA	NA	NA	NA
616	HEPHL1	-1.47974	1.78224	1.04004	0.307811	0.519559	-1.47982	1.7806	1.02236	0.31196	0.821164	2.12065	1.36526	2.81897	0.093156	0.131076	2.12054	1.36383	2.81864	0.0931751	0.224978	NA	NA	NA	NA	NA	NA	NA	NA	NA	NA	NA	NA	NA	NA	NA	NA	NA	NA	NA	NA	NA	NA	NA	NA	NA	NA	NA
617	SERINC5	3.45912	6.693	39.164	3.9e-10	3.09e-08	3.45924	6.69139	39.1601	3.90439e-10	5.10311e-08	2.11996	6.2275	200.56	1.58e-45	3.52e-44	2.11983	6.22605	200.532	1.59833e-45	6.17133e-44	NA	NA	NA	NA	NA	NA	NA	NA	NA	NA	NA	NA	NA	NA	NA	NA	NA	NA	NA	NA	NA	NA	NA	NA	NA	NA	NA
618	DOPEY1	2.36544	5.98774	31.054	2.51e-08	1.22e-06	2.36554	5.98612	31.0613	2.50013e-08	1.98529e-06	2.11558	5.30052	103.156	3.1e-24	3.39e-23	2.11545	5.29907	103.142	3.12017e-24	5.90979e-23	NA	NA	NA	NA	NA	NA	NA	NA	NA	NA	NA	NA	NA	NA	NA	NA	NA	NA	NA	NA	NA	NA	NA	NA	NA	NA	NA
619	2018-03-07	1.4995	5.04138	12.9642	0.0003175	0.00395292	NA	NA	NA	NA	NA	2.11489	4.79475	71.286	3.09e-17	2.34e-16	NA	NA	NA	NA	NA	NA	NA	NA	NA	NA	NA	NA	NA	NA	NA	NA	NA	NA	NA	NA	NA	NA	NA	NA	NA	NA	NA	NA	NA	NA	NA	NA
620	BRAF	1.67271	5.14004	18.0162	2.19e-05	0.000436734	1.6728	5.13841	17.9121	2.31343e-05	0.000748945	2.10934	4.81712	72.1861	1.96e-17	1.51e-16	2.1092	4.81567	72.1761	1.96824e-17	2.6164e-16	NA	NA	NA	NA	NA	NA	NA	NA	NA	NA	NA	NA	NA	NA	NA	NA	NA	NA	NA	NA	NA	NA	NA	NA	NA	NA	NA
621	HEXIM1	1.64079	7.19368	19.7941	8.62e-06	0.000197019	1.64089	7.19206	19.8521	8.3671e-06	0.000314409	2.10918	7.08574	362.749	7.1e-81	2.95e-79	2.10904	7.08428	362.699	7.27702e-81	5.24419e-79	NA	NA	NA	NA	NA	NA	NA	NA	1.53059	0.801815	0.523861	2	2.41134	0	0	1	2.3324	371507	359	3.33333	0.841282	0.360694	3	0.0137505	0.667611	3.47306	0.00051456
622	SERTAD1	1.82809	5.96669	16.4488	5e-05	0.00087818	1.82817	5.96507	16.4352	5.03426e-05	0.00144919	2.10858	6.48457	238.33	9.1e-54	2.44e-52	2.10845	6.48312	238.297	9.24805e-54	4.28649e-52	NA	NA	NA	NA	NA	NA	NA	NA	NA	NA	NA	NA	NA	NA	NA	NA	NA	NA	NA	NA	NA	NA	NA	NA	NA	NA	NA
623	CSRP2	1.38112	6.19535	7.44873	0.00634814	0.0393083	1.3812	6.19372	7.44427	0.00636386	0.0647244	2.10623	6.64053	265.431	1.12e-59	3.34e-58	2.1061	6.63907	265.394	1.14508e-59	5.89143e-58	-0.196153	0.77757	-3.9641	9	-0.203046	0.616288	-3.03521	11	0.503848	1.43654	2.85114	25	0.558412	0.862174	1.54398	27	0.515968	834681	193	3.51923	0.944913	1.83134	52	-0.00228078	0.115843	4.47371	7.68753e-06
624	GTF2B	1.74237	5.68503	22.4064	2.21e-06	6.08e-05	1.74247	5.6834	22.3449	2.27821e-06	0.000102324	2.10353	6.09992	181.071	2.83e-41	5.54e-40	2.1034	6.09847	181.046	2.86493e-41	9.70802e-40	1.92058	0	0	1	1.98374	0.43577	0.219671	3	2.99339	1.37305	0.458696	13	2.94124	1.86323	0.633484	8	2.99339	534241	316	3.38095	1.43713	0.4801	21	-0.00320757	0.178785	16.7608	4.71933e-63
625	ALAS1	1.11706	5.94447	7.20531	0.00726882	0.0433993	1.11715	5.94284	7.20165	0.00728367	0.0710901	2.10334	5.60356	127.169	1.71e-29	2.31e-28	2.10321	5.60211	127.151	1.72176e-29	4.03464e-28	NA	NA	NA	NA	NA	NA	NA	NA	NA	NA	NA	NA	NA	NA	NA	NA	NA	NA	NA	NA	NA	NA	NA	NA	NA	NA	NA
626	PCSK5	0.957079	4.27034	4.55921	0.0327422	0.124071	0.95718	4.2687	4.54179	0.033077	0.204266	2.1031	3.66431	29.8867	4.58e-08	1.77e-07	2.10297	3.66288	29.8826	4.59009e-08	3.0673e-07	NA	NA	NA	NA	NA	NA	NA	NA	NA	NA	NA	NA	NA	NA	NA	NA	NA	NA	NA	NA	NA	NA	NA	NA	NA	NA	NA
627	ZNF267	1.39571	4.6041	11.0557	0.000884155	0.00897484	1.39581	4.60247	11.0292	0.000896901	0.0148845	2.10255	5.12481	89.9531	2.44e-21	2.37e-20	2.10241	5.12336	89.9406	2.45421e-21	4.12163e-20	NA	NA	NA	NA	NA	NA	NA	NA	NA	NA	NA	NA	NA	NA	NA	NA	NA	NA	NA	NA	NA	NA	NA	NA	NA	NA	NA
628	CHAC1	0.292383	2.64719	0.171593	0.6787	0.819269	0.29255	2.64555	0.170579	0.679598	1	2.10148	2.84935	15.1206	0.000100854	0.000257485	2.10135	2.84792	15.1186	0.000100964	0.000446062	NA	NA	NA	NA	NA	NA	NA	NA	NA	NA	NA	NA	NA	NA	NA	NA	NA	NA	NA	NA	NA	NA	NA	NA	NA	NA	NA
629	ZRSR2	1.49816	4.31803	9.05714	0.0026167	0.0204208	1.49826	4.3164	9.02932	0.00265683	0.033904	2.09981	4.48618	56.075	6.98e-14	4.31e-13	2.09968	4.48474	56.0672	7.00366e-14	7.49253e-13	NA	NA	NA	NA	NA	NA	NA	NA	NA	NA	NA	NA	NA	NA	NA	NA	NA	NA	NA	NA	NA	NA	NA	NA	NA	NA	NA
630	FKBP1B	0.735189	2.60353	1.02851	0.310509	0.522429	0.735248	2.60189	1.02223	0.31199	0.821164	2.09892	2.39966	9.92829	0.00162757	0.00338579	2.09879	2.39823	9.92696	0.00162875	0.00586379	NA	NA	NA	NA	NA	NA	NA	NA	NA	NA	NA	NA	NA	NA	NA	NA	NA	NA	NA	NA	NA	NA	NA	NA	NA	NA	NA
631	SH3RF2	-0.326638	2.75241	0.218617	0.640096	0.792098	-0.326604	2.75077	0.216891	0.641419	1	2.09513	2.10633	7.31565	0.00683567	0.01257	2.095	2.10491	7.31468	0.00683936	0.0217666	NA	NA	NA	NA	NA	NA	NA	NA	NA	NA	NA	NA	NA	NA	NA	NA	NA	NA	NA	NA	NA	NA	NA	NA	NA	NA	NA
632	HSPH1	3.0522	7.60542	41.3828	1.25e-10	1.09e-08	3.05231	7.60381	41.4395	1.21573e-10	1.75223e-08	2.08997	8.09298	714.409	2.2e-157	2.25e-155	2.08984	8.09152	714.309	2.31246e-157	4.08917e-155	0.0276812	0.981576	35.46	24	0.438348	0.459067	1.04727	22	0.567418	0.795256	1.40153	95	0.484499	1.32931	2.74368	92	0.503259	1.1468e+06	858	3.49198	0.933051	1.85402	187	0.00168957	0.0592197	8.46964	2.46143e-17
633	HIPK3	1.8008	7.87624	19.8585	8.34e-06	0.00019117	1.80091	7.87462	19.9119	8.10939e-06	0.000305817	2.08949	7.68471	540.389	1.55e-119	1.03e-117	2.08936	7.68325	540.313	1.61167e-119	1.85324e-117	NA	NA	NA	NA	NA	NA	NA	NA	NA	NA	NA	NA	NA	NA	NA	NA	NA	NA	NA	NA	NA	NA	NA	NA	NA	NA	NA
634	MCTP1	1.00525	2.88598	1.34965	0.24534	0.452959	1.0053	2.88434	1.3406	0.246929	0.720682	2.08725	2.65664	12.5705	0.000391876	0.000908681	2.08712	2.65521	12.5688	0.000392235	0.00157392	NA	NA	NA	NA	NA	NA	NA	NA	NA	NA	NA	NA	NA	NA	NA	NA	NA	NA	NA	NA	NA	NA	NA	NA	NA	NA	NA
635	AL162389.1	1.61983	3.2041	5.93515	0.0148418	0.0712558	1.61991	3.20247	5.89733	0.0151639	0.11863	2.08628	2.78992	14.1806	0.000166071	0.000408292	2.08615	2.78849	14.1787	0.000166242	0.000707286	NA	NA	NA	NA	NA	NA	NA	NA	NA	NA	NA	NA	NA	NA	NA	NA	NA	NA	NA	NA	NA	NA	NA	NA	NA	NA	NA
636	EIF1	1.72607	9.67551	16.7552	4.25e-05	0.000767073	1.72617	9.67388	16.7992	4.15508e-05	0.00122975	2.08339	10.1752	1106.22	1.47e-242	2.45e-240	2.08325	10.1738	1098.45	7.18443e-241	2.043e-238	-0.0290338	0.389318	-13.4091	5	1.13881	0	0	1	0.721551	0.21576	0.299023	5	0.578012	0.378419	0.654691	2	0.721551	734821	121	3.28571	0.430755	0.596985	7	0.00479322	0.33722	2.12549	0.0335459
637	XIRP1	1.3847	4.09467	8.27049	0.00402946	0.0284653	1.38483	4.09303	8.21927	0.00414479	0.0476085	2.07877	3.9633	37.1021	1.12e-09	5.05e-09	2.07864	3.96187	37.097	1.12398e-09	8.75672e-09	NA	NA	NA	NA	NA	NA	NA	NA	NA	NA	NA	NA	0.834844	0	0	1	0.834844	49824.7	1843	4	0	0	1	0.017374	1.86572	0.438154	0.661275
638	FAM108B1	2.22433	5.00406	28.3037	1.04e-07	4.32e-06	2.22442	5.00243	28.1758	1.10779e-07	7.4477e-06	2.07856	5.04744	83.5262	6.29e-20	5.66e-19	2.07842	5.04599	83.5145	6.32491e-20	9.8516e-19	NA	NA	NA	NA	NA	NA	NA	NA	NA	NA	NA	NA	NA	NA	NA	NA	NA	NA	NA	NA	NA	NA	NA	NA	NA	NA	NA
639	RHPN2	1.76791	4.20329	15.2103	9.62e-05	0.00153845	1.76803	4.20165	15.1268	0.000100526	0.0026148	2.0784	4.79542	69.4313	7.91e-17	5.84e-16	2.07827	4.79398	69.4216	7.95149e-17	1.01593e-15	NA	NA	NA	NA	NA	NA	NA	NA	NA	NA	NA	NA	NA	NA	NA	NA	NA	NA	NA	NA	NA	NA	NA	NA	NA	NA	NA
640	ELAVL2	2.73158	5.07889	31.0275	2.54e-08	1.23e-06	2.73167	5.07726	30.8652	2.76581e-08	2.17981e-06	2.07778	5.53199	118.515	1.34e-27	1.67e-26	2.07765	5.53054	118.498	1.3488e-27	2.91405e-26	NA	NA	NA	NA	NA	NA	NA	NA	-0.132477	1.17647	-8.88055	7	1.23383	0.89793	0.727759	2	0.335899	439545	387	3.22222	1.12742	3.35644	9	0.00586004	0.299047	1.10363	0.269752
641	FAM13B	1.92248	6.47016	29.778	4.84e-08	2.19e-06	1.92259	6.46854	29.8678	4.62539e-08	3.42391e-06	2.07486	6.07979	174.762	6.75e-40	1.27e-38	2.07472	6.07833	174.737	6.83178e-40	2.22197e-38	NA	NA	NA	NA	NA	NA	NA	NA	NA	NA	NA	NA	NA	NA	NA	NA	NA	NA	NA	NA	NA	NA	NA	NA	NA	NA	NA
642	RCL1	1.7714	4.48652	6.74731	0.00938891	0.0513614	1.7715	4.48488	6.72135	0.00952657	0.0849971	2.07279	4.56918	58.4665	2.07e-14	1.32e-13	2.07265	4.56773	58.4583	2.07645e-14	2.30093e-13	NA	NA	NA	NA	NA	NA	NA	NA	0.0562264	0.735531	13.0816	3	-0.346162	0.664782	-1.92044	6	-0.249037	371742	373	3.66667	0.821627	-3.29922	9	-0.0151351	0.276554	-0.845772	0.39768
643	TBPL1	1.93979	4.90568	23.7829	1.08e-06	3.27e-05	1.93989	4.90405	23.6899	1.13178e-06	5.61697e-05	2.07175	5.41706	108.625	1.96e-25	2.24e-24	2.07161	5.41561	108.61	1.97572e-25	3.9111e-24	0.714184	0	0	1	1.28332	0	0	1	0.958683	0	0	1	1.44603	0.30634	0.211848	3	1.20236	430110	186	3.75	0.518683	0.431388	4	0.0112871	0.537062	2.21775	0.0265716
644	DNAJB1	1.67952	6.73409	15.2851	9.24e-05	0.00148796	1.67961	6.73247	15.2993	9.17506e-05	0.00242247	2.07153	7.88476	611.435	5.45e-135	4.6e-133	2.0714	7.8833	611.349	5.69388e-135	8.32058e-133	0.310056	0.0960009	0.309625	2	0.921444	0	0	1	1.00782	0.609876	0.605144	14	0.38111	0.300256	0.787846	4	0.940849	708653	340	3.22222	0.610695	0.649089	18	-0.0041728	0.191901	4.92454	8.45599e-07
645	NOS1AP	0.302107	2.31241	0.0969777	0.755487	0.863379	0.302032	2.31077	0.0957155	0.757033	1	2.0691	1.42912	3.00363	0.0830784	0.118468	2.069	1.4277	3.00326	0.0830972	0.203517	NA	NA	NA	NA	NA	NA	NA	NA	NA	NA	NA	NA	NA	NA	NA	NA	NA	NA	NA	NA	NA	NA	NA	NA	NA	NA	NA
646	DCLK2	2.73046	4.57722	26.4902	2.65e-07	9.49e-06	2.73057	4.57559	26.3923	2.78654e-07	1.61535e-05	2.06774	4.52439	56.3383	6.1e-14	3.78e-13	2.06761	4.52295	56.3304	6.12607e-14	6.57038e-13	NA	NA	NA	NA	NA	NA	NA	NA	NA	NA	NA	NA	NA	NA	NA	NA	NA	NA	NA	NA	NA	NA	NA	NA	NA	NA	NA
647	ZNF280B	2.32499	3.42809	4.98408	0.0255817	0.105451	2.32509	3.42645	4.96451	0.0258726	0.173593	2.06744	3.29814	21.6376	3.29e-06	1.04e-05	2.06731	3.2967	21.6346	3.29849e-06	1.79865e-05	NA	NA	NA	NA	NA	NA	NA	NA	NA	NA	NA	NA	NA	NA	NA	NA	NA	NA	NA	NA	NA	NA	NA	NA	NA	NA	NA
648	LIN7A	1.00785	3.65169	2.74755	0.0974038	0.253739	1.00792	3.65005	2.73122	0.098404	0.413978	2.06705	3.02322	17.1542	3.45e-05	9.42e-05	2.06692	3.02178	17.1518	3.45077e-05	0.000163142	NA	NA	NA	NA	NA	NA	NA	NA	NA	NA	NA	NA	NA	NA	NA	NA	NA	NA	NA	NA	NA	NA	NA	NA	NA	NA	NA
649	ZNF654	1.3596	5.604	11.0037	0.00090931	0.00917226	1.3597	5.60237	10.9682	0.000926871	0.0152734	2.06305	5.46679	111.839	3.88e-26	4.57e-25	2.06291	5.46534	111.823	3.90646e-26	7.96546e-25	NA	NA	NA	NA	NA	NA	NA	NA	NA	NA	NA	NA	NA	NA	NA	NA	NA	NA	NA	NA	NA	NA	NA	NA	NA	NA	NA
650	PNPLA8	1.40016	6.49329	15.5018	8.24e-05	0.00134358	1.40026	6.49166	15.539	8.08189e-05	0.00215821	2.06299	6.75687	278.732	1.42e-62	4.46e-61	2.06286	6.75541	278.693	1.44685e-62	7.86719e-61	NA	NA	NA	NA	NA	NA	NA	NA	NA	NA	NA	NA	NA	NA	NA	NA	NA	NA	NA	NA	NA	NA	NA	NA	NA	NA	NA
651	SGPP1	1.46251	4.74844	13.4066	0.000250743	0.00329062	1.4626	4.74681	13.3686	0.000255875	0.00549532	2.06273	4.92344	75.3914	3.86e-18	3.11e-17	2.0626	4.922	75.3808	3.88145e-18	5.41268e-17	NA	NA	NA	NA	NA	NA	NA	NA	NA	NA	NA	NA	NA	NA	NA	NA	NA	NA	NA	NA	NA	NA	NA	NA	NA	NA	NA
652	HKDC1	3.03815	1.74503	4.52073	0.0334866	0.126001	3.03828	1.74339	4.50177	0.0338597	0.207515	2.06141	1.47196	3.19076	0.0740556	0.107186	2.0613	1.47053	3.19036	0.0740735	0.184247	NA	NA	NA	NA	NA	NA	NA	NA	NA	NA	NA	NA	NA	NA	NA	NA	NA	NA	NA	NA	NA	NA	NA	NA	NA	NA	NA
653	AHCTF1	1.64279	7.62383	7.94114	0.00483234	0.0323691	1.64291	7.6222	7.9387	0.00483886	0.0529415	2.058	7.79544	569.296	7.99e-126	5.71e-124	2.05787	7.79398	569.216	8.31631e-126	1.02941e-123	0.302129	0	0	1	-3.74221	4.38543	-1.17188	4	-0.20112	0.826123	-4.10761	8	2.54539	1.7886	0.702683	9	1.14851	237643	2301	3.52941	2.72463	2.37231	17	-0.00439964	0.19301	5.97332	2.32476e-09
654	SYS1-DBNDD2	1.11824	1.82187	0.986206	0.320672	0.533112	1.11839	1.82023	0.981231	0.321895	0.837285	2.05782	1.85591	5.34326	0.0208026	0.0343554	2.0577	1.85448	5.34255	0.020811	0.0594443	NA	NA	NA	NA	NA	NA	NA	NA	NA	NA	NA	NA	NA	NA	NA	NA	NA	NA	NA	NA	NA	NA	NA	NA	NA	NA	NA
655	TRAPPC6B	1.93505	6.1512	30.0431	4.23e-08	1.93e-06	1.93515	6.14957	30.1196	4.06203e-08	3.05276e-06	2.05633	6.15676	181.946	1.82e-41	3.58e-40	2.0562	6.15531	181.92	1.84611e-41	6.28603e-40	1.38712	0	0	1	1.3402	0	0	1	0.559876	0.284244	0.507691	4	0.060724	0.456048	7.51018	3	0.478188	291529	158	3.42857	0.613843	1.28369	7	0.0148279	0.353255	1.31169	0.189626
656	IL18BP	-0.601781	4.25884	0.966077	0.32566	0.538113	-0.601697	4.2572	0.961989	0.326686	0.843285	2.0556	3.25528	20.6956	5.38e-06	1.65e-05	2.05547	3.25385	20.6927	5.39217e-06	2.85166e-05	NA	NA	NA	NA	NA	NA	NA	NA	NA	NA	NA	NA	NA	NA	NA	NA	NA	NA	NA	NA	NA	NA	NA	NA	NA	NA	NA
657	MED10	2.2918	5.15088	32.0131	1.53e-08	7.94e-07	2.2919	5.14926	31.8309	1.68198e-08	1.42144e-06	2.05208	5.18349	90.3986	1.95e-21	1.91e-20	2.05195	5.18204	90.3858	1.95967e-21	3.32023e-20	NA	NA	NA	NA	NA	NA	NA	NA	0.794914	0	0	1	NA	NA	NA	NA	0.794914	235041	135	3	0	0	1	0.101717	2.02099	0.342999	0.731599
658	SYPL2	2.41502	2.54866	7.12478	0.00760259	0.0445656	2.415	2.54702	7.06819	0.00784644	0.0744421	2.04688	2.71757	12.8929	0.000329827	0.000774097	2.04675	2.71614	12.8911	0.000330143	0.00134112	NA	NA	NA	NA	NA	NA	NA	NA	NA	NA	NA	NA	NA	NA	NA	NA	NA	NA	NA	NA	NA	NA	NA	NA	NA	NA	NA
659	CLP1	1.76282	5.12749	20.5123	5.92e-06	0.000144047	1.76292	5.12585	20.3993	6.28518e-06	0.000249546	2.0395	5.37258	102.657	3.99e-24	4.35e-23	2.03936	5.37113	102.642	4.01461e-24	7.58343e-23	NA	NA	NA	NA	NA	NA	NA	NA	NA	NA	NA	NA	NA	NA	NA	NA	NA	NA	NA	NA	NA	NA	NA	NA	NA	NA	NA
660	C16orf87	2.27209	4.30243	20.0327	7.61e-06	0.000176414	2.27218	4.3008	19.9672	7.87809e-06	0.000299239	2.03613	4.29722	46.3637	9.82e-12	5.22e-11	2.036	4.29579	46.3571	9.85516e-12	9.0639e-11	NA	NA	NA	NA	NA	NA	NA	NA	NA	NA	NA	NA	4.2385	0	0	1	4.2385	224691	154	4	0	0	1	0.120436	2.21186	1.86181	0.0626297
661	RCOR1	2.04835	7.03887	30.7626	2.92e-08	1.37e-06	2.04844	7.03725	30.8506	2.78674e-08	2.18811e-06	2.03198	7.00544	323.663	2.31e-72	8.34e-71	2.03185	7.00398	323.617	2.3609e-72	1.47859e-70	NA	NA	NA	NA	NA	NA	NA	NA	1.49932	0.629053	0.419558	4	0.651295	0.74292	1.14068	2	1.40103	452315	485	3.33333	1.26522	0.903063	6	-0.0199816	0.382411	3.71594	0.000202453
662	ZNF845	1.74559	4.84865	18.4091	1.78e-05	0.000366698	1.74569	4.84702	18.3531	1.83521e-05	0.000615924	2.03183	4.51054	54.2426	1.77e-13	1.07e-12	2.0317	4.5091	54.2348	1.77904e-13	1.84962e-12	NA	NA	NA	NA	NA	NA	NA	NA	NA	NA	NA	NA	NA	NA	NA	NA	NA	NA	NA	NA	NA	NA	NA	NA	NA	NA	NA
663	NUFIP1	2.38723	4.93472	21.326	3.87e-06	9.96e-05	2.38733	4.93309	21.2621	4.00573e-06	0.000168249	2.03105	4.895	72.0624	2.08e-17	1.6e-16	2.03092	4.89355	72.0521	2.09585e-17	2.78077e-16	NA	NA	NA	NA	NA	NA	NA	NA	NA	NA	NA	NA	NA	NA	NA	NA	NA	NA	NA	NA	NA	NA	NA	NA	NA	NA	NA
664	TAF5	2.3302	4.17387	15.0717	0.000103505	0.00162752	2.33031	4.17223	15.0136	0.000106741	0.00274085	2.03029	4.3537	48.171	3.91e-12	2.14e-11	2.03016	4.35226	48.1641	3.91996e-12	3.70898e-11	NA	NA	NA	NA	NA	NA	NA	NA	NA	NA	NA	NA	NA	NA	NA	NA	NA	NA	NA	NA	NA	NA	NA	NA	NA	NA	NA
665	PPARG	NA	NA	NA	NA	NA	-0.83598	1.49945	0.34447	0.55726	1	2.02397	1.49099	3.18928	0.0741228	0.10727	2.02386	1.48957	3.18887	0.0741411	0.18437	NA	NA	NA	NA	NA	NA	NA	NA	NA	NA	NA	NA	NA	NA	NA	NA	NA	NA	NA	NA	NA	NA	NA	NA	NA	NA	NA
666	SPAG1	0.736928	1.82803	0.448198	0.503192	0.693034	0.737032	1.82638	0.445988	0.504247	1	2.02263	1.8547	5.19275	0.0226813	0.0371251	2.02251	1.85328	5.19205	0.0226904	0.0642402	NA	NA	NA	NA	NA	NA	NA	NA	NA	NA	NA	NA	NA	NA	NA	NA	NA	NA	NA	NA	NA	NA	NA	NA	NA	NA	NA
667	ZNF460	1.79454	3.75175	11.4558	0.00071273	0.00760757	1.79465	3.75012	11.3587	0.000750961	0.0130599	2.01946	2.894	14.7803	0.000120789	0.000304415	2.01933	2.89257	14.7782	0.000120923	0.000527484	NA	NA	NA	NA	NA	NA	NA	NA	NA	NA	NA	NA	NA	NA	NA	NA	NA	NA	NA	NA	NA	NA	NA	NA	NA	NA	NA
668	PCDH10	2.07932	3.72025	6.67474	0.00977886	0.0528873	2.0795	3.71862	6.59871	0.0102053	0.0894305	2.01732	2.72054	12.6356	0.000378476	0.000880117	2.01719	2.71911	12.6338	0.000378835	0.00152513	NA	NA	NA	NA	NA	NA	NA	NA	NA	NA	NA	NA	NA	NA	NA	NA	NA	NA	NA	NA	NA	NA	NA	NA	NA	NA	NA
669	DHX8	2.07643	7.24947	25.4304	4.59e-07	1.52e-05	2.07654	7.24785	25.4842	4.46021e-07	2.43782e-05	2.01517	7.0705	334.206	1.17e-74	4.37e-73	2.01504	7.06905	334.158	1.19457e-74	7.75201e-73	NA	NA	NA	NA	NA	NA	NA	NA	2.86315	0	0	1	3.07431	1.77752	0.578186	2	2.86315	76208.6	1220	3.66667	1.77752	0.620828	3	0.0347881	0.696232	4.06238	4.85747e-05
670	MXD1	1.31513	3.87849	6.44961	0.0110977	0.0579722	1.31521	3.87685	6.40842	0.011358	0.0966074	2.01294	4.37529	48.3034	3.65e-12	2e-11	2.01281	4.37385	48.2964	3.66416e-12	3.4779e-11	NA	NA	NA	NA	NA	NA	NA	NA	NA	NA	NA	NA	NA	NA	NA	NA	NA	NA	NA	NA	NA	NA	NA	NA	NA	NA	NA
671	ZNF506	1.61545	3.4075	0.981933	0.321722	0.534202	1.61558	3.40585	0.978433	0.322586	0.837742	2.01201	3.349	21.6225	3.32e-06	1.04e-05	2.01188	3.34757	21.6194	3.32465e-06	1.81151e-05	NA	NA	NA	NA	NA	NA	NA	NA	NA	NA	NA	NA	NA	NA	NA	NA	NA	NA	NA	NA	NA	NA	NA	NA	NA	NA	NA
672	SCML1	2.43919	5.64302	24.9174	5.98e-07	1.94e-05	2.43929	5.6414	24.8416	6.22386e-07	3.28242e-05	2.01013	5.81354	137.631	8.77e-32	1.27e-30	2.01	5.81209	137.611	8.86302e-32	2.22559e-30	NA	NA	NA	NA	NA	NA	NA	NA	NA	NA	NA	NA	NA	NA	NA	NA	NA	NA	NA	NA	NA	NA	NA	NA	NA	NA	NA
673	INO80D	1.38822	5.27698	10.8815	0.00097128	0.00967593	1.38831	5.27535	10.8168	0.00100585	0.0163319	2.00816	4.92993	72.6097	1.58e-17	1.22e-16	2.00803	4.92848	72.5992	1.58841e-17	2.13034e-16	NA	NA	NA	NA	NA	NA	NA	NA	NA	NA	NA	NA	NA	NA	NA	NA	NA	NA	NA	NA	NA	NA	NA	NA	NA	NA	NA
674	GBX2	1.84795	1.78268	2.27449	0.131519	0.307979	1.84808	1.78104	2.26337	0.132466	0.49928	2.0059	2.34703	8.77585	0.00305245	0.00599394	2.00577	2.3456	8.77463	0.0030545	0.0103805	NA	NA	NA	NA	NA	NA	NA	NA	NA	NA	NA	NA	NA	NA	NA	NA	NA	NA	NA	NA	NA	NA	NA	NA	NA	NA	NA
675	BCAS2	2.37034	6.06686	37.1891	1.07e-09	7.38e-08	2.37044	6.06524	37.2498	1.03923e-09	1.17573e-07	2.00578	5.85107	140.856	1.73e-32	2.56e-31	2.00565	5.84962	140.836	1.74761e-32	4.48474e-31	-0.535289	0.974726	-1.82093	3	0.194047	0.0868692	0.447671	2	-0.668699	0.57767	-0.863872	3	-0.366187	0.408769	-1.11628	3	-0.517443	435891	225	3.5	0.687138	-1.32795	6	0.0224662	0.41886	-1.289	0.197399
676	DUSP12	2.35704	5.34323	33.5255	7.03e-09	3.95e-07	2.35714	5.34161	33.3411	7.73307e-09	7.07509e-07	2.00331	5.2024	88.2491	5.77e-21	5.48e-20	2.00318	5.20096	88.2364	5.80824e-21	9.54865e-20	NA	NA	NA	NA	NA	NA	NA	NA	0.186887	0	0	1	0.555497	0	0	1	0.371192	356573	340	3.5	0.184305	0.496522	2	0.0693455	1.52231	0.198282	0.842824
677	CRLF3	2.36824	5.10757	33.0205	9.12e-09	4.99e-07	2.36834	5.10595	32.8495	9.95763e-09	8.87875e-07	2.00224	5.36585	99.2218	2.26e-23	2.4e-22	2.00211	5.3644	99.2074	2.27394e-23	4.18275e-22	NA	NA	NA	NA	NA	NA	NA	NA	2.41429	1.65666	0.686191	2	1.06654	0	0	1	1.06654	357569	442	3.33333	1.65666	1.55331	3	0.0122259	0.71809	1.46821	0.142046
678	RNF138	2.21237	5.5154	22.359	2.26e-06	6.19e-05	2.21247	5.51377	22.2663	2.3733e-06	0.000105808	2.00182	5.78454	133.934	5.65e-31	7.94e-30	2.00168	5.78309	133.914	5.70446e-31	1.38773e-29	NA	NA	NA	NA	NA	NA	NA	NA	NA	NA	NA	NA	NA	NA	NA	NA	NA	NA	NA	NA	NA	NA	NA	NA	NA	NA	NA
679	DDX10	1.93623	5.6872	13.6543	0.000219734	0.0029716	1.93634	5.68557	13.6128	0.000224651	0.00496569	2.0018	5.86362	141.68	1.14e-32	1.7e-31	2.00166	5.86217	141.659	1.15436e-32	2.97322e-31	NA	NA	NA	NA	NA	NA	NA	NA	0.800173	0.439601	0.549383	2	NA	NA	NA	NA	0.800173	142947	875	3	0.439601	0.549383	2	0.117062	1.32455	0.51573	0.606043
680	ACER2	0.165999	2.81458	0.0523534	0.819018	0.901843	0.166013	2.81294	0.0519258	0.819746	1	2.00079	2.69291	12.162	0.000487739	0.00111291	2.00066	2.69148	12.1602	0.000488189	0.00192775	NA	NA	NA	NA	NA	NA	NA	NA	NA	NA	NA	NA	NA	NA	NA	NA	NA	NA	NA	NA	NA	NA	NA	NA	NA	NA	NA
681	ZSCAN5A	1.96862	2.88523	5.82431	0.0158062	0.0750954	1.96877	2.88359	5.78876	0.016129	0.124724	2.00073	2.89831	14.6217	0.000131395	0.000329098	2.0006	2.89688	14.6196	0.00013154	0.000570017	NA	NA	NA	NA	NA	NA	NA	NA	NA	NA	NA	NA	NA	NA	NA	NA	NA	NA	NA	NA	NA	NA	NA	NA	NA	NA	NA
682	ANKRD36BP1	2.98717	3.50362	17.1135	3.52e-05	0.000657269	2.98724	3.50199	17.0198	3.6993e-05	0.00112492	1.99989	2.55535	10.6929	0.00107547	0.00230594	1.99976	2.55392	10.6914	0.00107635	0.00399465	NA	NA	NA	NA	NA	NA	NA	NA	NA	NA	NA	NA	NA	NA	NA	NA	NA	NA	NA	NA	NA	NA	NA	NA	NA	NA	NA
683	TAF3	1.46792	5.35611	14.3213	0.00015411	0.00222948	1.46801	5.35447	14.237	0.00016117	0.00379788	1.99869	5.0732	80.0367	3.68e-19	3.17e-18	1.99855	5.07175	80.0251	3.69687e-19	5.52117e-18	NA	NA	NA	NA	NA	NA	NA	NA	NA	NA	NA	NA	NA	NA	NA	NA	NA	NA	NA	NA	NA	NA	NA	NA	NA	NA	NA
684	RBBP5	1.95678	5.97907	22.0392	2.67e-06	7.14e-05	1.95689	5.97744	22.0434	2.66549e-06	0.000116854	1.99622	5.92209	147.043	7.68e-34	1.18e-32	1.99608	5.92064	147.021	7.76387e-34	2.06804e-32	-0.852208	0	0	1	NA	NA	NA	NA	1.70232	1.34762	0.791638	4	-0.041362	0.531876	-12.859	3	0.738765	261593	538	3.42857	1.40087	1.89623	7	-0.00182735	0.361464	2.04887	0.040475
685	ZFP91-CNTF	1.55061	2.6362	4.3095	0.0379	0.136421	1.55076	2.63456	4.28072	0.0385471	0.225738	1.99328	2.44749	9.59397	0.00195217	0.00399472	1.99315	2.44607	9.59262	0.00195361	0.0069185	NA	NA	NA	NA	NA	NA	NA	NA	NA	NA	NA	NA	NA	NA	NA	NA	NA	NA	NA	NA	NA	NA	NA	NA	NA	NA	NA
686	CYP27B1	0.662538	1.60172	0.250555	0.616685	0.776805	0.662667	1.60008	0.248169	0.618367	1	1.99214	1.31737	2.35046	0.125246	0.170173	1.99204	1.31595	2.35017	0.125269	0.291307	NA	NA	NA	NA	NA	NA	NA	NA	NA	NA	NA	NA	NA	NA	NA	NA	NA	NA	NA	NA	NA	NA	NA	NA	NA	NA	NA
687	IFNLR1	NA	NA	NA	NA	NA	1.23378	1.34011	0.53918	0.462773	1	1.98979	1.44543	2.89337	0.0889447	0.125814	1.98968	1.444	2.893	0.088965	0.216027	NA	NA	NA	NA	NA	NA	NA	NA	NA	NA	NA	NA	NA	NA	NA	NA	NA	NA	NA	NA	NA	NA	NA	NA	NA	NA	NA
688	BPGM	1.70959	4.59718	16.9634	3.81e-05	0.000697329	1.70968	4.59555	16.9222	3.89425e-05	0.00116733	1.98931	5.32281	95.2117	1.71e-22	1.76e-21	1.98917	5.32137	95.1979	1.72276e-22	3.0722e-21	-1.27017	0	0	1	-0.419643	0	0	1	-3.08423	1.49387	-0.484358	6	1.69324	0.398303	0.235231	2	-2.26648	682404	259	3.25	2.83861	-1.25243	8	0.0102115	0.350223	-6.5007	7.99479e-11
689	CLK1	2.04972	7.62232	26.2915	2.94e-07	1.03e-05	2.04981	7.62071	26.3572	2.83755e-07	1.63144e-05	1.98832	7.77762	532.597	7.69e-118	4.97e-116	1.98819	7.77616	532.519	7.99743e-118	8.95159e-116	NA	NA	NA	NA	NA	NA	NA	NA	NA	NA	NA	NA	NA	NA	NA	NA	NA	NA	NA	NA	NA	NA	NA	NA	NA	NA	NA
690	CSRNP3	1.91167	2.97137	7.90154	0.00493927	0.0328799	1.9118	2.96973	7.85439	0.00506975	0.0547934	1.98475	2.25524	7.86156	0.00504969	0.00953533	1.98463	2.25382	7.86046	0.00505276	0.0165153	NA	NA	NA	NA	NA	NA	NA	NA	NA	NA	NA	NA	NA	NA	NA	NA	NA	NA	NA	NA	NA	NA	NA	NA	NA	NA	NA
691	MTUS1	2.13104	2.99234	3.3534	0.0670665	0.198377	2.13113	2.9907	3.33072	0.0679971	0.325821	1.98348	2.32845	8.46144	0.00362754	0.00702673	1.98335	2.32702	8.46025	0.00362991	0.0121728	NA	NA	NA	NA	NA	NA	NA	NA	NA	NA	NA	NA	NA	NA	NA	NA	NA	NA	NA	NA	NA	NA	NA	NA	NA	NA	NA
692	MFSD11	1.76701	5.44911	21.206	4.12e-06	0.00010463	1.76711	5.44749	21.1003	4.35866e-06	0.000180906	1.97879	5.49465	106.849	4.8e-25	5.45e-24	1.97865	5.49321	106.834	4.84184e-25	9.51324e-24	NA	NA	NA	NA	NA	NA	NA	NA	NA	NA	NA	NA	NA	NA	NA	NA	NA	NA	NA	NA	NA	NA	NA	NA	NA	NA	NA
693	SIRT7	1.1709	4.9699	4.50609	0.0337743	0.126528	1.17099	4.96828	4.4908	0.0340777	0.208035	1.97798	4.76796	62.9431	2.13e-15	1.45e-14	1.97785	4.76652	62.9339	2.1376e-15	2.52847e-14	NA	NA	NA	NA	NA	NA	NA	NA	NA	NA	NA	NA	NA	NA	NA	NA	NA	NA	NA	NA	NA	NA	NA	NA	NA	NA	NA
694	CCDC59	2.37019	5.64052	38.1584	6.52e-10	4.85e-08	2.37028	5.63889	38.0399	6.93127e-10	8.47992e-08	1.97358	5.47719	105.08	1.17e-24	1.3e-23	1.97345	5.47574	105.065	1.18193e-24	2.26929e-23	NA	NA	NA	NA	NA	NA	NA	NA	NA	NA	NA	NA	2.30814	0	0	1	2.30814	400818	241	4	0	0	1	0.110041	1.78527	1.23124	0.218233
695	FRS2	1.86586	6.77399	23.9021	1.01e-06	3.09e-05	1.86597	6.77236	23.957	9.85103e-07	4.9356e-05	1.97292	6.56385	226.962	2.74e-51	6.81e-50	1.97279	6.56239	226.929	2.78659e-51	1.19915e-49	NA	NA	NA	NA	NA	NA	NA	NA	NA	NA	NA	NA	NA	NA	NA	NA	NA	NA	NA	NA	NA	NA	NA	NA	NA	NA	NA
696	PKN2	1.98021	7.53684	27.2661	1.77e-07	6.69e-06	1.98031	7.53522	27.3494	1.6982e-07	1.05726e-05	1.97174	7.92985	583.128	7.83e-129	5.77e-127	1.9716	7.92839	583.042	8.17163e-129	1.04215e-126	1.47453	0	0	1	NA	NA	NA	NA	0.654918	0.873201	1.3333	19	1.24613	4.56269	3.66149	28	0.866048	449514	984	3.59574	2.01268	2.32398	47	-0.00650082	0.118338	7.37334	1.66399e-13
697	RNGTT	2.33842	6.15969	26.984	2.05e-07	7.52e-06	2.33852	6.15807	26.9996	2.03503e-07	1.23263e-05	1.97158	6.50757	217.936	2.55e-49	6.22e-48	1.97144	6.50612	217.904	2.59151e-49	1.09504e-47	NA	NA	NA	NA	NA	NA	NA	NA	NA	NA	NA	NA	NA	NA	NA	NA	NA	NA	NA	NA	NA	NA	NA	NA	NA	NA	NA
698	RELN	2.92463	1.37948	2.4722	0.115876	0.283054	2.92468	1.37783	2.46028	0.116758	0.460619	1.97144	1.74202	4.33144	0.0374146	0.0582596	1.97132	1.74059	4.33085	0.0374275	0.100624	NA	NA	NA	NA	NA	NA	NA	NA	NA	NA	NA	NA	NA	NA	NA	NA	NA	NA	NA	NA	NA	NA	NA	NA	NA	NA	NA
699	EFHD1	NA	NA	NA	NA	NA	0.237519	1.2933	0.0198637	0.887918	1	1.97055	2.03719	6.1561	0.0130959	0.0226463	1.97043	2.03576	6.15525	0.0131023	0.0392025	NA	NA	NA	NA	NA	NA	NA	NA	NA	NA	NA	NA	NA	NA	NA	NA	NA	NA	NA	NA	NA	NA	NA	NA	NA	NA	NA
700	MFAP3L	0.356451	5.1042	1.02077	0.312337	0.524484	0.356555	5.10256	1.01556	0.313575	0.824201	1.97018	4.19156	40.6266	1.84e-10	8.91e-10	1.97005	4.19013	40.6206	1.84844e-10	1.54659e-09	NA	NA	NA	NA	NA	NA	NA	NA	NA	NA	NA	NA	NA	NA	NA	NA	NA	NA	NA	NA	NA	NA	NA	NA	NA	NA	NA
701	DYNC1I1	1.91599	2.16462	3.74572	0.0529429	0.170467	1.91618	2.16298	3.72224	0.0536924	0.280986	1.96993	2.00062	5.90463	0.0151012	0.0257657	1.96981	1.99919	5.90381	0.0151082	0.0445956	NA	NA	NA	NA	NA	NA	NA	NA	NA	NA	NA	NA	NA	NA	NA	NA	NA	NA	NA	NA	NA	NA	NA	NA	NA	NA	NA
702	ECD	1.93814	6.28311	27.7961	1.35e-07	5.37e-06	1.93824	6.28149	27.8612	1.3034e-07	8.65035e-06	1.96783	6.18272	172.865	1.75e-39	3.27e-38	1.9677	6.18127	172.84	1.7742e-39	5.73495e-38	NA	NA	NA	NA	NA	NA	NA	NA	NA	NA	NA	NA	NA	NA	NA	NA	NA	NA	NA	NA	NA	NA	NA	NA	NA	NA	NA
703	LRRC16A	1.97803	4.00197	16.501	4.86e-05	0.000857841	1.97813	4.00034	16.3822	5.17701e-05	0.00148058	1.96764	3.69664	27.6225	1.47e-07	5.36e-07	1.9675	3.6952	27.6184	1.47764e-07	9.30119e-07	NA	NA	NA	NA	0.365821	0	0	1	NA	NA	NA	NA	NA	NA	NA	NA	NA	NA	NA	NA	NA	NA	NA	NA	NA	NA	NA
704	BMP4	1.41487	2.93039	4.35738	0.036849	0.134147	1.41499	2.92875	4.33036	0.0374383	0.221545	1.96464	2.43878	9.29509	0.00229769	0.00463696	1.96451	2.43735	9.29377	0.00229935	0.00803208	NA	NA	NA	NA	NA	NA	NA	NA	NA	NA	NA	NA	NA	NA	NA	NA	NA	NA	NA	NA	NA	NA	NA	NA	NA	NA	NA
705	RPP40	1.98817	3.3261	9.57148	0.00197623	0.0164827	1.9882	3.32446	9.48639	0.00207001	0.0280304	1.9646	3.1935	18.2985	1.89e-05	5.36e-05	1.96447	3.19207	18.2959	1.89117e-05	9.28728e-05	NA	NA	NA	NA	NA	NA	NA	NA	NA	NA	NA	NA	2.17918	0	0	1	2.17918	65758.5	363	4	0	0	1	0.0442103	1.86621	1.14401	0.252618
706	MED6	1.91875	5.65733	24.5781	7.14e-07	2.27e-05	1.91885	5.6557	24.5072	7.4031e-07	3.8565e-05	1.96069	5.83471	134.294	4.71e-31	6.63e-30	1.96056	5.83326	134.275	4.7579e-31	1.16014e-29	NA	NA	NA	NA	NA	NA	NA	NA	NA	NA	NA	NA	0.42757	0	0	1	0.42757	409468	253	4	0	0	1	0.189012	2.27877	0.104687	0.916624
707	GOLGB1	1.45435	8.09994	14.1541	0.000168433	0.00240085	1.45446	8.09831	14.2009	0.000164292	0.00385809	1.95937	8.13725	543.284	3.64e-120	2.43e-118	1.95924	8.13579	539.509	2.41135e-119	2.75772e-117	0.370767	1.03135	2.78166	16	-1.23653	1.99628	-1.61442	10	0.531985	1.51261	2.84332	44	2.33251	2.09331	0.897447	53	1.44076	578818	3269	3.54639	2.19697	1.52486	97	0.000411932	0.0791743	18.1922	5.95462e-74
708	PNO1	2.49133	5.69815	36.7	1.38e-09	9.13e-08	2.49143	5.69653	36.6059	1.44593e-09	1.56838e-07	1.95799	5.8551	135.955	2.04e-31	2.91e-30	1.95786	5.85365	135.935	2.06156e-31	5.08086e-30	1.30408	0	0	1	1.71961	0	0	1	0.887626	0.2646	0.298099	5	2.63266	2.78935	1.05952	6	1.1505	191596	252	3.54545	2.56515	2.2296	11	-0.000674041	0.267815	4.29839	1.72043e-05
709	NR4A3	-0.243998	1.7153	0.0441844	0.833511	0.910772	-0.243858	1.71366	0.0439246	0.833994	1	1.95639	1.38208	2.54337	0.110758	0.152967	1.95628	1.38066	2.54305	0.110781	0.262075	NA	NA	NA	NA	NA	NA	NA	NA	NA	NA	NA	NA	NA	NA	NA	NA	NA	NA	NA	NA	NA	NA	NA	NA	NA	NA	NA
710	DUSP16	-0.052885	4.15528	0.0165057	0.897773	0.946802	-0.0527985	4.15363	0.016357	0.898232	1	1.95612	3.91723	32.5335	1.17e-08	4.82e-08	1.95599	3.9158	32.5287	1.17446e-08	8.36071e-08	NA	NA	NA	NA	NA	NA	NA	NA	NA	NA	NA	NA	NA	NA	NA	NA	NA	NA	NA	NA	NA	NA	NA	NA	NA	NA	NA
711	RBM15	1.8023	5.03736	20.8585	4.95e-06	0.000122775	1.8024	5.03573	20.7615	5.20185e-06	0.000209762	1.95523	5.0507	76.0358	2.79e-18	2.25e-17	1.95509	5.04926	76.0246	2.80159e-18	3.92503e-17	0.0488266	0.503109	10.304	2	0.400403	0.104271	0.260416	2	0.361735	0.999114	2.762	16	-0.20016	0.289318	-1.44544	15	-0.0436604	949182	977	3.48387	0.974488	-22.3197	31	0.00455877	0.144963	-0.332631	0.739413
712	CDKL5	2.38062	4.6022	27.1549	1.88e-07	7e-06	2.38072	4.60057	27.0912	1.94077e-07	1.18376e-05	1.95184	3.80717	29.7469	4.92e-08	1.89e-07	1.95171	3.80573	29.7425	4.93399e-08	3.28355e-07	NA	NA	NA	NA	NA	NA	NA	NA	NA	NA	NA	NA	NA	NA	NA	NA	NA	NA	NA	NA	NA	NA	NA	NA	NA	NA	NA
713	YPEL5	1.4372	7.40834	16.2168	5.65e-05	0.000963592	1.43731	7.40671	16.2754	5.47715e-05	0.00154237	1.94867	7.66842	478.512	4.5e-106	2.52e-104	1.94854	7.66696	478.441	4.66647e-106	4.52518e-104	0.290003	0.453173	1.56265	2	1.76549	0	0	1	2.13673	0.0857212	0.040118	3	1.65085	0.140192	0.0849209	3	1.94176	1.90528e+06	121	3.5	0.404828	0.208485	6	0.00973091	0.393481	4.91011	9.10274e-07
714	ABCC9	-0.280614	5.22355	0.0928445	0.760592	0.866901	-0.280469	5.22188	0.0924159	0.761128	1	1.94782	3.72503	27.7962	1.35e-07	4.93e-07	1.94769	3.72359	27.7921	1.35073e-07	8.53559e-07	NA	NA	NA	NA	NA	NA	NA	NA	NA	NA	NA	NA	NA	NA	NA	NA	NA	NA	NA	NA	NA	NA	NA	NA	NA	NA	NA
715	CHD1	1.74123	6.34236	19.7823	8.68e-06	0.000197891	1.74134	6.34073	19.8176	8.51944e-06	0.000318994	1.94652	6.67087	239.372	5.39e-54	1.46e-52	1.94639	6.66941	239.336	5.48855e-54	2.56657e-52	NA	NA	NA	NA	NA	NA	NA	NA	NA	NA	NA	NA	NA	NA	NA	NA	NA	NA	NA	NA	NA	NA	NA	NA	NA	NA	NA
716	EXOSC10	2.28807	7.36221	33.7075	6.41e-09	3.63e-07	2.28817	7.36059	33.7989	6.11127e-09	5.71553e-07	1.94544	7.42547	403.83	8.08e-90	3.72e-88	1.94531	7.42401	403.77	8.32469e-90	6.63781e-88	NA	NA	NA	NA	-0.864423	0	0	1	1.12883	1.24572	1.10355	8	NA	NA	NA	NA	1.12883	362696	885	3	1.24572	1.10355	8	-3.40389e-05	0.326311	3.45948	0.000541227
717	ACAP2	2.01054	7.64775	19.5789	9.65e-06	0.000217798	2.01065	7.64613	19.6065	9.51425e-06	0.00035248	1.94522	7.43002	405.023	4.44e-90	2.08e-88	1.94509	7.42857	404.962	4.57837e-90	3.70549e-88	NA	NA	NA	NA	NA	NA	NA	NA	NA	NA	NA	NA	NA	NA	NA	NA	NA	NA	NA	NA	NA	NA	NA	NA	NA	NA	NA
718	YARS2	2.17016	5.42482	31.765	1.74e-08	8.92e-07	2.17026	5.42319	31.6033	1.89108e-08	1.57288e-06	1.94425	5.47421	102.385	4.57e-24	4.97e-23	1.94411	5.47277	102.37	4.60661e-24	8.67833e-23	NA	NA	NA	NA	NA	NA	NA	NA	0.862766	0	0	1	0.22473	1.08967	4.84877	3	0.543748	508113	477	3.75	1.02336	1.88205	4	0.012094	0.579593	0.917289	0.358991
719	TCHH	NA	NA	NA	NA	NA	1.06296	1.41934	0.467911	0.49395	1	1.944	1.38957	2.54822	0.110419	0.152533	1.94389	1.38815	2.54789	0.110442	0.261361	NA	NA	NA	NA	NA	NA	NA	NA	NA	NA	NA	NA	NA	NA	NA	NA	NA	NA	NA	NA	NA	NA	NA	NA	NA	NA	NA
720	RP11-159G9.5	1.32365	4.39437	8.7338	0.00312366	0.0236036	1.32375	4.39274	8.71148	0.00316212	0.0390955	1.94163	4.14951	38.4339	5.66e-10	2.62e-09	1.9415	4.14807	38.4282	5.68057e-10	4.54856e-09	NA	NA	NA	NA	NA	NA	NA	NA	NA	NA	NA	NA	NA	NA	NA	NA	NA	NA	NA	NA	NA	NA	NA	NA	NA	NA	NA
721	MOSPD1	1.8423	5.08337	22.8371	1.76e-06	5.02e-05	1.8424	5.08174	22.7173	1.87666e-06	8.6602e-05	1.93919	5.76101	125.197	4.61e-29	6.15e-28	1.93905	5.75956	125.179	4.65088e-29	1.07548e-27	NA	NA	NA	NA	NA	NA	NA	NA	0.478954	0.879117	1.83549	2	NA	NA	NA	NA	0.478954	190101	214	3	0.879117	1.83549	2	0.126792	1.43631	0.245184	0.806314
722	FAM133B	2.19912	5.75295	32.6368	1.11e-08	5.98e-07	2.19922	5.75133	32.5761	1.14613e-08	1.00912e-06	1.93887	6.09867	159.066	1.81e-36	3.09e-35	1.93873	6.09722	159.042	1.83205e-36	5.39185e-35	NA	NA	NA	NA	NA	NA	NA	NA	NA	NA	NA	NA	NA	NA	NA	NA	NA	NA	NA	NA	NA	NA	NA	NA	NA	NA	NA
723	FBXL12	1.41818	5.31138	13.103	0.00029483	0.00372477	1.41829	5.30975	13.0189	0.000308361	0.00632441	1.93496	5.47048	101.333	7.77e-24	8.43e-23	1.93482	5.46903	101.318	7.83323e-24	1.47043e-22	NA	NA	NA	NA	NA	NA	NA	NA	NA	NA	NA	NA	NA	NA	NA	NA	NA	NA	NA	NA	NA	NA	NA	NA	NA	NA	NA
724	ARID4A	1.4369	5.6279	16.7472	4.27e-05	0.000768166	1.437	5.62627	16.6923	4.396e-05	0.00128479	1.93057	5.54829	106.743	5.07e-25	5.73e-24	1.93044	5.54684	106.727	5.10989e-25	1.00212e-23	NA	NA	NA	NA	NA	NA	NA	NA	NA	NA	NA	NA	NA	NA	NA	NA	NA	NA	NA	NA	NA	NA	NA	NA	NA	NA	NA
725	UTS2	NA	NA	NA	NA	NA	2.5328	1.24857	1.63377	0.201182	0.641968	1.92815	1.48284	2.91162	0.0879434	0.124586	1.92804	1.48141	2.91124	0.0879643	0.213943	NA	NA	NA	NA	NA	NA	NA	NA	NA	NA	NA	NA	NA	NA	NA	NA	NA	NA	NA	NA	NA	NA	NA	NA	NA	NA	NA
726	ZNF574	2.15131	5.98501	34.8142	3.63e-09	2.22e-07	2.1514	5.98339	34.8596	3.54364e-09	3.61985e-07	1.92715	5.70097	118.755	1.18e-27	1.48e-26	1.92702	5.69953	118.738	1.19539e-27	2.59058e-26	NA	NA	NA	NA	NA	NA	NA	NA	NA	NA	NA	NA	NA	NA	NA	NA	NA	NA	NA	NA	NA	NA	NA	NA	NA	NA	NA
727	NOP58	2.54968	7.1416	29.282	6.26e-08	2.74e-06	2.54979	7.13998	29.3111	6.16423e-08	4.44226e-06	1.92648	7.18656	337.065	2.78e-75	1.05e-73	1.92634	7.1851	337.014	2.85198e-75	1.8696e-73	-0.241051	0.704363	-2.92205	10	0.509621	0.253369	0.497171	3	0.184777	1.05882	5.73025	52	0.764927	1.87984	2.45755	69	0.497374	704008	529	3.57025	1.3809	2.77638	121	0.000355134	0.0739222	6.72354	1.77358e-11
728	SLU7	1.70405	7.02451	23.0023	1.62e-06	4.67e-05	1.70415	7.02288	23.077	1.55645e-06	7.41003e-05	1.92305	6.95783	286.749	2.54e-64	8.18e-63	1.92292	6.95638	286.705	2.59665e-64	1.44937e-62	NA	NA	NA	NA	NA	NA	NA	NA	NA	NA	NA	NA	4.59082	2.53717	0.552661	2	4.59082	410457	586	4	2.53717	0.552661	2	0.0847242	1.47588	3.05315	0.00226456
729	KDM6A	1.54736	5.98126	10.3105	0.00132276	0.0122192	1.54747	5.97963	10.3036	0.00132768	0.0201431	1.92228	5.98381	144.635	2.58e-33	3.9e-32	1.92215	5.98236	144.613	2.60893e-33	6.82832e-32	NA	NA	NA	NA	NA	NA	NA	NA	NA	NA	NA	NA	NA	NA	NA	NA	NA	NA	NA	NA	NA	NA	NA	NA	NA	NA	NA
730	HAPLN3	-0.664176	3.14089	1.15319	0.282883	0.49561	-0.664133	3.13924	1.14523	0.284549	0.784561	1.91829	3.0571	15.6935	7.45e-05	0.000194224	1.91816	3.05567	15.6912	7.45692e-05	0.000336513	NA	NA	NA	NA	NA	NA	NA	NA	NA	NA	NA	NA	NA	NA	NA	NA	NA	NA	NA	NA	NA	NA	NA	NA	NA	NA	NA
731	CCNT2	2.13254	6.77165	32.576	1.15e-08	6.14e-07	2.13263	6.77003	32.6555	1.10027e-08	9.74095e-07	1.91788	6.54961	214.731	1.28e-48	3.05e-47	1.91774	6.54816	214.699	1.29656e-48	5.36021e-47	NA	NA	NA	NA	NA	NA	NA	NA	NA	NA	NA	NA	NA	NA	NA	NA	NA	NA	NA	NA	NA	NA	NA	NA	NA	NA	NA
732	UGT8	1.38055	2.44076	3.01733	0.0823789	0.22716	1.38065	2.43912	3.00349	0.0830852	0.371045	1.91605	2.44321	8.9687	0.00274644	0.00544317	1.91593	2.44178	8.9674	0.0027484	0.00942546	NA	NA	NA	NA	NA	NA	NA	NA	NA	NA	NA	NA	NA	NA	NA	NA	NA	NA	NA	NA	NA	NA	NA	NA	NA	NA	NA
733	ZCCHC8	1.46819	5.59347	16.4907	4.89e-05	0.000861303	1.46829	5.59184	16.4322	5.0421e-05	0.00144946	1.9152	5.77163	123.649	1.01e-28	1.33e-27	1.91507	5.77018	123.63	1.01497e-28	2.319e-27	NA	NA	NA	NA	NA	NA	NA	NA	NA	NA	NA	NA	NA	NA	NA	NA	NA	NA	NA	NA	NA	NA	NA	NA	NA	NA	NA
734	PPM1K	0.287816	4.9711	0.202637	0.652601	0.800531	0.287903	4.96947	0.202068	0.653057	1	1.91517	4.08933	35.9077	2.07e-09	9.13e-09	1.91504	4.08789	35.9023	2.07462e-09	1.58462e-08	NA	NA	NA	NA	NA	NA	NA	NA	NA	NA	NA	NA	NA	NA	NA	NA	NA	NA	NA	NA	NA	NA	NA	NA	NA	NA	NA
735	ZBTB49	2.09596	3.76868	15.6949	7.44e-05	0.00122998	2.09606	3.76705	15.5523	8.02543e-05	0.00214859	1.91473	3.24708	18.3666	1.82e-05	5.18e-05	1.9146	3.24565	18.3639	1.82486e-05	8.98259e-05	NA	NA	NA	NA	NA	NA	NA	NA	NA	NA	NA	NA	NA	NA	NA	NA	NA	NA	NA	NA	NA	NA	NA	NA	NA	NA	NA
736	BUD31	2.03561	6.77419	31.2362	2.28e-08	1.12e-06	2.03571	6.77256	31.3213	2.18664e-08	1.76975e-06	1.91197	6.99555	291.667	2.15e-65	7.1e-64	1.91184	6.9941	291.623	2.20267e-65	1.25612e-63	NA	NA	NA	NA	NA	NA	NA	NA	NA	NA	NA	NA	NA	NA	NA	NA	NA	NA	NA	NA	NA	NA	NA	NA	NA	NA	NA
737	FKSG62	0.78087	2.00957	0.632296	0.426514	0.629565	0.780959	2.00793	0.629301	0.427612	0.968802	1.91018	1.60497	3.42546	0.0641982	0.0944709	1.91006	1.60354	3.425	0.0642164	0.162632	NA	NA	NA	NA	NA	NA	NA	NA	NA	NA	NA	NA	NA	NA	NA	NA	NA	NA	NA	NA	NA	NA	NA	NA	NA	NA	NA
738	KLF11	1.11472	4.74023	6.17869	0.0129298	0.0648946	1.11482	4.73859	6.16075	0.0130616	0.107057	1.90964	4.76905	59.5438	1.2e-14	7.78e-14	1.90951	4.76761	59.5348	1.20151e-14	1.35278e-13	NA	NA	NA	NA	NA	NA	NA	NA	NA	NA	NA	NA	NA	NA	NA	NA	NA	NA	NA	NA	NA	NA	NA	NA	NA	NA	NA
739	RGAG4	0.373325	4.40478	0.731163	0.392506	0.599253	0.373416	4.40314	0.729461	0.393058	0.927567	1.90907	4.29978	41.9315	9.45e-11	4.66e-10	1.90894	4.29834	41.9252	9.48314e-11	8.08892e-10	NA	NA	NA	NA	NA	NA	NA	NA	NA	NA	NA	NA	NA	NA	NA	NA	NA	NA	NA	NA	NA	NA	NA	NA	NA	NA	NA
740	SCAF4	2.25343	6.81397	36.7339	1.35e-09	9.12e-08	2.25353	6.81235	36.8338	1.28642e-09	1.42262e-07	1.90891	6.39928	191.791	1.29e-43	2.7e-42	1.90878	6.39783	191.762	1.31147e-43	4.74178e-42	0.119822	0.309297	2.58131	2	-0.206748	0.303528	-1.4681	3	NA	NA	NA	NA	NA	NA	NA	NA	NA	NA	NA	NA	NA	NA	NA	NA	NA	NA	NA
741	CCRN4L	0.343209	3.66084	0.51911	0.471222	0.667516	0.3433	3.6592	0.514736	0.473096	1	1.90682	3.89937	30.7923	2.87e-08	1.13e-07	1.90669	3.89793	30.7877	2.87854e-08	1.96675e-07	NA	NA	NA	NA	NA	NA	NA	NA	NA	NA	NA	NA	NA	NA	NA	NA	NA	NA	NA	NA	NA	NA	NA	NA	NA	NA	NA
742	AC009060.1	1.63158	2.92343	5.99206	0.0143704	0.0696114	1.63167	2.92179	5.95501	0.0146756	0.115749	1.90603	2.768	12.0515	0.000517508	0.00117686	1.9059	2.76658	12.0497	0.000518003	0.00203897	NA	NA	NA	NA	NA	NA	NA	NA	NA	NA	NA	NA	NA	NA	NA	NA	NA	NA	NA	NA	NA	NA	NA	NA	NA	NA	NA
743	HOXB6	1.65654	5.33682	10.4807	0.00120628	0.0113906	1.65664	5.3352	10.4253	0.00124299	0.0191909	1.90592	5.7526	121.023	3.78e-28	4.85e-27	1.90578	5.75116	121.004	3.81302e-28	8.48175e-27	NA	NA	NA	NA	NA	NA	NA	NA	NA	NA	NA	NA	NA	NA	NA	NA	NA	NA	NA	NA	NA	NA	NA	NA	NA	NA	NA
744	TPRG1	1.04359	1.65212	0.639697	0.42382	0.627678	1.04372	1.65047	0.633092	0.426223	0.967521	1.90375	1.56387	3.21406	0.0730081	0.105915	1.90364	1.56245	3.21362	0.0730276	0.182141	NA	NA	NA	NA	NA	NA	NA	NA	NA	NA	NA	NA	NA	NA	NA	NA	NA	NA	NA	NA	NA	NA	NA	NA	NA	NA	NA
745	KLHL24	1.11496	5.82018	8.65951	0.00325359	0.0243565	1.11507	5.81854	8.6497	0.00327116	0.0400903	1.9005	5.74194	119.545	7.96e-28	1e-26	1.90037	5.74049	119.527	8.02896e-28	1.75263e-26	NA	NA	NA	NA	NA	NA	NA	NA	NA	NA	NA	NA	NA	NA	NA	NA	NA	NA	NA	NA	NA	NA	NA	NA	NA	NA	NA
746	PPP2R5A	1.43888	5.39713	11.748	0.000609076	0.00671236	1.43897	5.3955	11.6953	0.000626573	0.0112788	1.89825	5.34298	89.6254	2.88e-21	2.78e-20	1.89812	5.34154	89.6118	2.89792e-21	4.84745e-20	NA	NA	NA	NA	NA	NA	NA	NA	NA	NA	NA	NA	NA	NA	NA	NA	NA	NA	NA	NA	NA	NA	NA	NA	NA	NA	NA
747	PPP2R5A	1.43888	5.39713	11.748	0.000609076	0.00671236	1.67682	2.46811	2.91028	0.0880168	0.385701	1.89825	5.34298	89.6254	2.88e-21	2.78e-20	1.52561	3.12537	11.3474	0.000755528	0.00288855	NA	NA	NA	NA	NA	NA	NA	NA	NA	NA	NA	NA	NA	NA	NA	NA	NA	NA	NA	NA	NA	NA	NA	NA	NA	NA	NA
748	TXLNG	1.74795	5.33701	8.9579	0.00276273	0.0213658	1.74805	5.33538	8.91904	0.00282212	0.0356886	1.89317	5.74168	118.786	1.17e-27	1.46e-26	1.89304	5.74023	118.768	1.17708e-27	2.55353e-26	NA	NA	NA	NA	NA	NA	NA	NA	NA	NA	NA	NA	NA	NA	NA	NA	NA	NA	NA	NA	NA	NA	NA	NA	NA	NA	NA
749	MAD2L1BP	1.71154	5.24862	21.3891	3.75e-06	9.7e-05	1.71164	5.24699	21.2461	4.03936e-06	0.000168987	1.89308	5.34201	89.1705	3.62e-21	3.47e-20	1.89295	5.34057	89.1569	3.64705e-21	6.04766e-20	NA	NA	NA	NA	NA	NA	NA	NA	1.75017	0	0	1	NA	NA	NA	NA	1.75017	104788	306	3	0	0	1	0.162111	1.90093	0.835409	0.403487
750	PSPC1	1.88092	6.13258	22.4584	2.15e-06	5.93e-05	1.88103	6.13096	22.492	2.11018e-06	9.54938e-05	1.89259	6.16397	160.226	1.01e-36	1.73e-35	1.89245	6.16252	160.201	1.02252e-36	3.03483e-35	-0.0684675	0.292319	-4.26946	6	0.166361	0.100768	0.60572	2	0.105128	1.17329	11.1606	14	0.251308	1.0205	4.06074	11	0.251308	650394	523	3.44	1.04762	4.16865	25	-0.00335652	0.167322	1.522	0.128009
751	POMZP3	0.853106	4.38178	3.40848	0.0648623	0.194179	0.8532	4.38013	3.39775	0.0652856	0.317276	1.89152	4.0108	33.1351	8.6e-09	3.59e-08	1.89139	4.00937	33.1301	8.61948e-09	6.22229e-08	NA	NA	NA	NA	NA	NA	NA	NA	NA	NA	NA	NA	NA	NA	NA	NA	NA	NA	NA	NA	NA	NA	NA	NA	NA	NA	NA
752	HSPA4L	0.301691	5.4514	0.410861	0.521533	0.706641	0.301791	5.44975	0.409376	0.522286	1	1.88962	5.31	86.8696	1.16e-20	1.08e-19	1.88948	5.30856	86.8564	1.16693e-20	1.886e-19	0.584755	0	0	1	1.17657	0	0	1	1.13589	2.37513	2.09098	8	1.42276	2.02922	1.42625	12	1.37399	302631	870	3.6	2.08498	1.51746	20	-0.00256994	0.184763	7.45042	9.30404e-14
753	GJB2	NA	NA	NA	NA	NA	2.36196	1.18344	1.34968	0.245333	0.718118	1.88923	1.66563	3.65636	0.0558557	0.0833242	1.88912	1.66421	3.65585	0.0558727	0.143539	NA	NA	NA	NA	NA	NA	NA	NA	NA	NA	NA	NA	NA	NA	NA	NA	NA	NA	NA	NA	NA	NA	NA	NA	NA	NA	NA
754	ZNF263	1.58346	5.94164	19.3354	1.1e-05	0.000243145	1.58356	5.94001	19.3479	1.08937e-05	0.000395918	1.88696	5.92079	134.226	4.88e-31	6.86e-30	1.88683	5.91934	134.205	4.92716e-31	1.20003e-29	NA	NA	NA	NA	NA	NA	NA	NA	NA	NA	NA	NA	NA	NA	NA	NA	NA	NA	NA	NA	NA	NA	NA	NA	NA	NA	NA
755	DDX3X	1.88819	9.38873	9.78376	0.00176059	0.0152083	1.88831	9.3871	9.78205	0.00176223	0.025022	1.88606	9.95748	1349.17	2.33e-295	5.25e-293	1.88593	9.95602	1351.93	5.87842e-296	2.33395e-293	0.297527	0.819742	2.75518	9	0.166414	0.658451	3.9567	10	0.532025	0.71362	1.34133	150	0.212954	1.05804	4.9684	191	0.371422	1.28295e+06	662	3.56012	0.916193	2.46672	341	0.000323726	0.0435338	8.52437	1.53644e-17
756	ZBTB2	1.45966	5.14699	13.048	0.000303604	0.0038038	1.45975	5.14536	12.9829	0.000314343	0.00640961	1.8856	5.24531	82.6139	9.98e-20	8.89e-19	1.88547	5.24386	82.6013	1.00391e-19	1.54763e-18	NA	NA	NA	NA	NA	NA	NA	NA	NA	NA	NA	NA	NA	NA	NA	NA	NA	NA	NA	NA	NA	NA	NA	NA	NA	NA	NA
757	TRMT6	2.07222	5.44928	28.5697	9.04e-08	3.85e-06	2.07232	5.44766	28.4308	9.71098e-08	6.65629e-06	1.88055	5.2351	81.6477	1.63e-19	1.43e-18	1.88042	5.23366	81.6353	1.63667e-19	2.48488e-18	NA	NA	NA	NA	NA	NA	NA	NA	0.257098	0.630357	2.45182	4	-0.729796	1.23566	-1.69315	2	0.257098	383809	497	3.33333	1.08416	4.2169	6	-0.00894427	0.381265	0.697789	0.485309
758	DNAJC25	2.14659	5.97588	33.2629	8.05e-09	4.46e-07	2.14669	5.97426	33.296	7.91468e-09	7.2099e-07	1.87977	6.06256	147.5	6.1e-34	9.45e-33	1.87964	6.06111	147.477	6.17266e-34	1.65466e-32	-0.584374	0	0	1	0.447104	0	0	1	-0.0255467	0	0	1	0.58426	0	0	1	0.279357	634844	360	3.5	0.304904	1.09145	2	0.033288	1.33178	0.184767	0.853412
759	TCF7	1.06923	1.95439	1.06708	0.301606	0.513601	1.06931	1.95274	1.06104	0.302979	0.80929	1.87931	1.77185	4.16305	0.0413149	0.0636722	1.87919	1.77042	4.16246	0.0413293	0.10993	NA	NA	NA	NA	NA	NA	NA	NA	NA	NA	NA	NA	NA	NA	NA	NA	NA	NA	NA	NA	NA	NA	NA	NA	NA	NA	NA
760	OSBPL8	1.97594	7.97341	27.4401	1.62e-07	6.18e-06	1.97604	7.97179	27.5381	1.54029e-07	9.70429e-06	1.87836	7.90957	531.748	1.18e-117	7.53e-116	1.87823	7.90811	531.667	1.22545e-117	1.35722e-115	0.364848	2.20349	6.03948	3	0.220579	0.835713	3.78872	5	0.765953	1.01036	1.31909	21	0.462649	1.15908	2.50531	16	0.697647	332655	889	3.43243	1.03127	1.47821	37	-0.00778945	0.131571	5.36164	8.24709e-08
761	ELF1	0.848791	6.88053	4.24966	0.0392582	0.139978	0.848905	6.8789	4.25561	0.0391209	0.228039	1.87825	7.02155	288.493	1.06e-64	3.45e-63	1.87812	7.0201	288.449	1.08265e-64	6.10781e-63	NA	NA	NA	NA	NA	NA	NA	NA	4.60038	0	0	1	4.40898	1.30143	0.295176	2	4.60038	164720	619	3.66667	1.30143	0.282896	3	0.0602877	0.852066	5.32833	9.91209e-08
762	CD14	0.840964	2.05006	0.618161	0.431732	0.633474	0.840878	2.04842	0.610935	0.434436	0.975245	1.87754	2.18852	6.7083	0.00959653	0.0170935	1.87742	2.1871	6.70731	0.00960182	0.0296046	NA	NA	NA	NA	NA	NA	NA	NA	NA	NA	NA	NA	NA	NA	NA	NA	NA	NA	NA	NA	NA	NA	NA	NA	NA	NA	NA
763	LGR4	0.837607	3.49269	2.59025	0.107524	0.270415	0.837693	3.49105	2.56902	0.108975	0.441844	1.87669	3.7032	25.7313	3.92e-07	1.37e-06	1.87656	3.70176	25.7274	3.93207e-07	2.3852e-06	NA	NA	NA	NA	NA	NA	NA	NA	NA	NA	NA	NA	NA	NA	NA	NA	NA	NA	NA	NA	NA	NA	NA	NA	NA	NA	NA
764	TVP23C	1.23447	3.34696	3.85379	0.0496337	0.163654	1.23456	3.34533	3.82926	0.0503651	0.269884	1.87607	3.43729	20.7812	5.15e-06	1.58e-05	1.87594	3.43586	20.7781	5.15705e-06	2.73763e-05	NA	NA	NA	NA	NA	NA	NA	NA	NA	NA	NA	NA	NA	NA	NA	NA	NA	NA	NA	NA	NA	NA	NA	NA	NA	NA	NA
765	ZNHIT2	2.0187	4.32011	12.0701	0.000512372	0.0058477	2.0188	4.31848	12.0342	0.000522327	0.00980494	1.86768	4.21089	37.8337	7.7e-10	3.52e-09	1.86754	4.20945	37.8279	7.72672e-10	6.11713e-09	NA	NA	NA	NA	NA	NA	NA	NA	NA	NA	NA	NA	NA	NA	NA	NA	NA	NA	NA	NA	NA	NA	NA	NA	NA	NA	NA
766	ZNF490	0.819212	3.90566	3.33993	0.0676177	0.199594	0.819296	3.90402	3.31574	0.0686194	0.327874	1.86713	3.65767	24.6191	6.99e-07	2.38e-06	1.867	3.65624	24.6153	6.99935e-07	4.12916e-06	NA	NA	NA	NA	NA	NA	NA	NA	NA	NA	NA	NA	NA	NA	NA	NA	NA	NA	NA	NA	NA	NA	NA	NA	NA	NA	NA
767	CHKA	0.839852	3.71428	2.73595	0.098113	0.254563	0.839919	3.71264	2.71252	0.0995637	0.416451	1.86657	4.08323	34.2927	4.74e-09	2.03e-08	1.86644	4.08179	34.2875	4.75434e-09	3.51778e-08	NA	NA	NA	NA	NA	NA	NA	NA	NA	NA	NA	NA	NA	NA	NA	NA	NA	NA	NA	NA	NA	NA	NA	NA	NA	NA	NA
768	NHSL2	1.46753	1.87314	1.61564	0.203701	0.403979	1.46772	1.8715	1.60396	0.205344	0.648221	1.86537	1.63642	3.44163	0.0635728	0.0936413	1.86525	1.635	3.44115	0.0635914	0.161223	NA	NA	NA	NA	NA	NA	NA	NA	NA	NA	NA	NA	NA	NA	NA	NA	NA	NA	NA	NA	NA	NA	NA	NA	NA	NA	NA
769	MLL3	1.42593	7.51487	10.3105	0.00132279	0.0122192	1.42604	7.51324	10.3246	0.00131269	0.0199732	1.86434	7.01528	283.787	1.12e-63	3.56e-62	1.86421	7.01383	283.743	1.148e-63	6.30738e-62	NA	NA	NA	NA	NA	NA	NA	NA	NA	NA	NA	NA	NA	NA	NA	NA	NA	NA	NA	NA	NA	NA	NA	NA	NA	NA	NA
770	HSPA8	2.78922	11.0146	38.5825	5.25e-10	3.99e-08	2.78932	11.013	38.6762	5.00284e-10	6.22928e-08	1.86358	11.872	1913.65	0	0	1.86344	11.8705	1918.64	0	0	0.391016	0.955493	2.44362	264	0.580869	0.57165	0.984129	247	0.536734	0.469487	0.87471	391	0.104684	0.714716	6.82738	423	0.38214	4.53122e+06	646	3.51966	0.774347	2.02634	814	-0.000859289	0.028067	13.6459	2.13516e-42
771	MSX1	0.424234	2.7586	0.280794	0.596181	0.761893	0.424306	2.75696	0.278377	0.597767	1	1.86112	2.78635	11.7877	0.000596244	0.00134136	1.86099	2.78492	11.7859	0.000596813	0.00232397	NA	NA	NA	NA	NA	NA	NA	NA	NA	NA	NA	NA	NA	NA	NA	NA	NA	NA	NA	NA	NA	NA	NA	NA	NA	NA	NA
772	POLG2	1.25945	3.85717	6.89932	0.00862286	0.048364	1.25956	3.85553	6.84624	0.00888281	0.0809532	1.86069	4.01087	32.2667	1.34e-08	5.49e-08	1.86056	4.00943	32.2618	1.34737e-08	9.53029e-08	NA	NA	NA	NA	NA	NA	NA	NA	NA	NA	NA	NA	NA	NA	NA	NA	NA	NA	NA	NA	NA	NA	NA	NA	NA	NA	NA
773	BRIX1	2.5272	5.76248	41.7651	1.03e-10	9.26e-09	2.5273	5.76085	41.6897	1.06971e-10	1.56318e-08	1.8598	6.13093	152.146	5.89e-35	9.44e-34	1.85966	6.12948	152.123	5.95589e-35	1.64908e-33	0.315717	0.810649	2.56764	3	-0.0110285	0.517199	-46.8966	2	-0.102848	1.377	-13.3886	4	0.223623	1.29505	5.79124	13	0.223623	696694	353	3.76471	1.00687	4.50254	17	-0.00180224	0.213064	1.05802	0.290048
774	ZNF330	2.23656	6.41143	32.1043	1.46e-08	7.61e-07	2.23666	6.40981	32.1583	1.42106e-08	1.22055e-06	1.85945	6.48114	194.62	3.12e-44	6.62e-43	1.85932	6.47968	194.59	3.16594e-44	1.16267e-42	NA	NA	NA	NA	NA	NA	NA	NA	1.53769	2.53071	1.64579	3	NA	NA	NA	NA	1.53769	360448	320	3	2.53071	1.64579	3	0.0212122	0.690733	2.19546	0.0281307
775	RASA2	2.26116	5.78465	36.1662	1.81e-09	1.19e-07	2.26126	5.78303	36.1135	1.8615e-09	1.99855e-07	1.85658	6.3476	176.75	2.48e-40	4.74e-39	1.85645	6.34615	176.722	2.51817e-40	8.31864e-39	NA	NA	NA	NA	NA	NA	NA	NA	NA	NA	NA	NA	NA	NA	NA	NA	NA	NA	NA	NA	NA	NA	NA	NA	NA	NA	NA
776	ZNF10	1.56023	3.89417	7.83909	0.00511282	0.0336176	1.56034	3.89253	7.79545	0.0052378	0.056034	1.8551	3.62951	23.8177	1.06e-06	3.54e-06	1.85497	3.62808	23.814	1.06108e-06	6.1375e-06	NA	NA	NA	NA	NA	NA	NA	NA	NA	NA	NA	NA	NA	NA	NA	NA	NA	NA	NA	NA	NA	NA	NA	NA	NA	NA	NA
777	PLK2	0.93663	8.47361	6.2397	0.0124918	0.0634005	0.936724	8.47197	6.26186	0.0123364	0.102729	1.85421	8.45007	751.103	2.31e-165	2.51e-163	1.85408	8.44862	750.987	2.44823e-165	4.59982e-163	NA	NA	NA	NA	NA	NA	NA	NA	NA	NA	NA	NA	NA	NA	NA	NA	NA	NA	NA	NA	NA	NA	NA	NA	NA	NA	NA
778	FAM53C	1.82263	7.032	20.8653	4.93e-06	0.000122697	1.82274	7.03037	20.9095	4.81492e-06	0.000196738	1.85378	6.83227	247.576	8.77e-56	2.44e-54	1.85365	6.83082	247.537	8.93986e-56	4.30484e-54	NA	NA	NA	NA	NA	NA	NA	NA	NA	NA	NA	NA	NA	NA	NA	NA	NA	NA	NA	NA	NA	NA	NA	NA	NA	NA	NA
779	C16orf80	2.21877	6.18003	35.5105	2.54e-09	1.62e-07	2.21886	6.17841	35.5855	2.44103e-09	2.55555e-07	1.85329	6.41409	184.696	4.57e-42	9.13e-41	1.85315	6.41264	184.667	4.63947e-42	1.60046e-40	0.622825	0	0	1	0.937895	0.406429	0.433342	3	0.858652	1.28494	1.49646	12	-0.00680281	0.444785	-65.3825	11	0.219628	1.3522e+06	193	3.47826	0.954172	4.34449	23	-0.00200741	0.175171	1.26525	0.205782
780	TDG	1.82671	5.86345	24.8549	6.18e-07	1.99e-05	1.82681	5.86182	24.847	6.20652e-07	3.28242e-05	1.85265	6.26002	165.602	6.76e-38	1.2e-36	1.85252	6.25857	165.577	6.8446e-38	2.09652e-36	NA	NA	NA	NA	NA	NA	NA	NA	NA	NA	NA	NA	NA	NA	NA	NA	NA	NA	NA	NA	NA	NA	NA	NA	NA	NA	NA
781	NOLC1	2.35613	7.69456	24.0737	9.27e-07	2.87e-05	2.35624	7.69294	24.1003	9.14473e-07	4.63693e-05	1.85154	7.67487	442.428	3.21e-98	1.65e-96	1.8514	7.67342	442.36	3.3181e-98	2.9586e-96	NA	NA	NA	NA	NA	NA	NA	NA	0.419888	0.253094	0.602766	10	0.325717	1.5852	4.86678	3	0.40688	1.45609e+06	709	3.23077	0.297532	0.731252	13	-0.00459102	0.227863	1.80578	0.0709519
782	PHLPP2	2.14508	5.77079	28.5459	9.15e-08	3.87e-06	2.14519	5.76916	28.4939	9.39933e-08	6.52772e-06	1.84948	5.91043	128.956	6.93e-30	9.53e-29	1.84935	5.90898	128.936	7.00336e-30	1.6671e-28	NA	NA	NA	NA	NA	NA	NA	NA	NA	NA	NA	NA	NA	NA	NA	NA	NA	NA	NA	NA	NA	NA	NA	NA	NA	NA	NA
783	AC010642.1	2.18493	2.69467	7.6057	0.00581842	0.0369534	2.18508	2.69303	7.55455	0.00598587	0.061958	1.84937	2.54499	9.33681	0.00224596	0.00454011	1.84924	2.54356	9.3354	0.00224769	0.00786336	NA	NA	NA	NA	NA	NA	NA	NA	NA	NA	NA	NA	NA	NA	NA	NA	NA	NA	NA	NA	NA	NA	NA	NA	NA	NA	NA
784	PPP1R13B	0.980092	3.23841	3.00411	0.0830538	0.228362	0.980161	3.23677	2.98405	0.0840887	0.374255	1.84767	3.60581	23.222	1.44e-06	4.76e-06	1.84754	3.60438	23.2184	1.44607e-06	8.25102e-06	NA	NA	NA	NA	NA	NA	NA	NA	NA	NA	NA	NA	NA	NA	NA	NA	NA	NA	NA	NA	NA	NA	NA	NA	NA	NA	NA
785	NANS	2.59518	6.36679	43.4871	4.27e-11	3.98e-09	2.59529	6.36517	43.5808	4.06807e-11	6.20322e-09	1.84284	6.97133	270.091	1.08e-60	3.29e-59	1.84271	6.96988	270.049	1.10698e-60	5.82355e-59	0.00474084	0.216235	45.611	12	0.948576	0.759996	0.801197	15	0.111802	0.757232	6.77296	21	0.261484	1.41008	5.39262	34	0.176021	727020	359	3.61818	1.04235	5.92174	55	-0.00172343	0.105335	1.68743	0.0915216
786	TAF13	1.86257	5.27847	24.5077	7.4e-07	2.33e-05	1.86266	5.27684	24.3435	8.05962e-07	4.12649e-05	1.84274	5.39273	88.522	5.03e-21	4.79e-20	1.8426	5.39128	88.5082	5.06249e-21	8.34875e-20	NA	NA	NA	NA	NA	NA	NA	NA	NA	NA	NA	NA	NA	NA	NA	NA	NA	NA	NA	NA	NA	NA	NA	NA	NA	NA	NA
787	ID2	1.6974	6.76561	6.39564	0.0114401	0.0594132	1.69746	6.76399	6.386	0.0115024	0.0976773	1.84085	7.34223	348.58	8.64e-78	3.45e-76	1.84072	7.34077	348.525	8.8773e-78	6.12475e-76	NA	NA	NA	NA	NA	NA	NA	NA	NA	NA	NA	NA	NA	NA	NA	NA	NA	NA	NA	NA	NA	NA	NA	NA	NA	NA	NA
788	FAM32A	1.71657	7.21059	22.5028	2.1e-06	5.82e-05	1.71668	7.20896	22.5761	2.01985e-06	9.19993e-05	1.83962	7.49648	387.289	3.22e-86	1.42e-84	1.83949	7.49503	387.228	3.32094e-86	2.53198e-84	NA	NA	NA	NA	NA	NA	NA	NA	1.43523	0.0963786	0.0671518	2	2.16024	1.13821	0.52689	4	1.58611	926685	112	3.66667	1.01614	0.640646	6	0.00821144	0.407457	3.87256	0.000107698
789	MSL2	1.89719	6.24158	15.4001	8.7e-05	0.00140893	1.8973	6.23995	15.4018	8.69033e-05	0.00230606	1.83622	5.80213	118.001	1.73e-27	2.15e-26	1.83609	5.80069	117.982	1.74952e-27	3.76048e-26	NA	NA	NA	NA	NA	NA	NA	NA	NA	NA	NA	NA	NA	NA	NA	NA	NA	NA	NA	NA	NA	NA	NA	NA	NA	NA	NA
790	FBXW7	0.87219	5.15208	5.03605	0.024825	0.103334	0.872286	5.15044	5.00866	0.0252208	0.17065	1.83164	5.07412	69.5816	7.33e-17	5.43e-16	1.83151	5.07268	69.5708	7.37216e-17	9.44777e-16	NA	NA	NA	NA	NA	NA	NA	NA	NA	NA	NA	NA	NA	NA	NA	NA	NA	NA	NA	NA	NA	NA	NA	NA	NA	NA	NA
791	BRWD3	1.61158	6.27794	21.3357	3.85e-06	9.94e-05	1.61169	6.27631	21.3951	3.73726e-06	0.000158555	1.82985	6.2503	161.161	6.31e-37	1.09e-35	1.82971	6.24885	161.135	6.39123e-37	1.90767e-35	NA	NA	NA	NA	NA	NA	NA	NA	NA	NA	NA	NA	NA	NA	NA	NA	NA	NA	NA	NA	NA	NA	NA	NA	NA	NA	NA
792	DRAXIN	2.89691	4.78241	2.2872	0.130445	0.306033	2.89706	4.78077	2.27925	0.131115	0.495254	1.82958	2.97751	13.568	0.000230077	0.000553232	1.82945	2.97608	13.5659	0.000230333	0.000958453	NA	NA	NA	NA	NA	NA	NA	NA	NA	NA	NA	NA	NA	NA	NA	NA	NA	NA	NA	NA	NA	NA	NA	NA	NA	NA	NA
793	RCAN3	0.660419	2.63746	0.600313	0.438459	0.63891	0.660472	2.63581	0.593709	0.440988	0.982186	1.82943	2.67101	10.3184	0.00131708	0.0027808	1.8293	2.66958	10.3169	0.0013182	0.00481745	NA	NA	NA	NA	NA	NA	NA	NA	NA	NA	NA	NA	NA	NA	NA	NA	NA	NA	NA	NA	NA	NA	NA	NA	NA	NA	NA
794	SF1	2.13381	8.80584	28.3757	9.99e-08	4.19e-06	2.13392	8.80423	28.4667	9.5326e-08	6.57687e-06	1.82802	8.39109	429.045	2.62e-95	1.31e-93	1.82788	8.38963	424.471	2.59586e-94	2.22958e-92	-0.078988	0.777543	-9.84381	10	-0.147895	1.01715	-6.87753	9	-0.0840744	0.273004	-3.24717	2	0.0163985	1.16877	71.2727	25	0.0163985	703571	756.852	3.92593	1.12862	68.8247	27	0.00532213	0.159269	0.0695454	0.944556
795	ZNF711	2.06698	5.0554	27.3098	1.73e-07	6.6e-06	2.06708	5.05377	27.17	1.86332e-07	1.14088e-05	1.82676	4.81183	57.1717	3.99e-14	2.51e-13	1.82663	4.81039	57.1628	4.0119e-14	4.36743e-13	NA	NA	NA	NA	NA	NA	NA	NA	NA	NA	NA	NA	NA	NA	NA	NA	NA	NA	NA	NA	NA	NA	NA	NA	NA	NA	NA
796	ZNF256	1.50013	3.16386	3.84213	0.0499801	0.164398	1.50025	3.16222	3.82248	0.0505693	0.270358	1.82644	3.54835	21.7609	3.09e-06	9.76e-06	1.82631	3.54691	21.7575	3.09379e-06	1.69274e-05	NA	NA	NA	NA	NA	NA	NA	NA	NA	NA	NA	NA	NA	NA	NA	NA	NA	NA	NA	NA	NA	NA	NA	NA	NA	NA	NA
797	DCP1A	1.7082	6.49388	22.1169	2.57e-06	6.9e-05	1.7083	6.49225	22.1678	2.49831e-06	0.000110214	1.8261	6.22182	157.453	4.08e-36	6.83e-35	1.82597	6.22037	157.428	4.1267e-36	1.19942e-34	-0.262463	0	0	1	-0.48062	0	0	1	0.203242	2.14501	10.554	4	0.784052	1.60536	2.04752	4	0.305549	366483	584	3.5	0.586269	1.91874	8	-0.00130035	0.289009	1.06173	0.288359
798	C3orf58	1.75045	6.88379	11.354	0.000752864	0.00795402	1.75053	6.88218	11.3496	0.000754642	0.0131023	1.82495	6.88353	250.036	2.55e-56	7.23e-55	1.82481	6.88208	249.997	2.60083e-56	1.27574e-54	NA	NA	NA	NA	NA	NA	NA	NA	1.64741	1.13082	0.686422	10	1.77772	1.17155	0.65902	5	1.6857	728006	430	3.33333	1.22412	0.726177	15	-0.014864	0.228965	7.42717	1.10945e-13
799	ZIK1	1.43927	4.14484	9.9809	0.00158172	0.0140584	1.43938	4.14321	9.92575	0.00162982	0.0236039	1.82433	4.99027	65.024	7.4e-16	5.17e-15	1.8242	4.98883	65.0139	7.43734e-16	8.98931e-15	NA	NA	NA	NA	NA	NA	NA	NA	NA	NA	NA	NA	NA	NA	NA	NA	NA	NA	NA	NA	NA	NA	NA	NA	NA	NA	NA
800	ACVR2A	1.51809	4.66842	11.6098	0.000656064	0.00712037	1.51818	4.66679	11.5822	0.000665861	0.0118242	1.82421	4.06005	32.4423	1.23e-08	5.04e-08	1.82408	4.05862	32.4373	1.23103e-08	8.7456e-08	NA	NA	NA	NA	-12.5677	0	0	1	NA	NA	NA	NA	NA	NA	NA	NA	NA	NA	NA	NA	NA	NA	NA	NA	NA	NA	NA
801	IP6K2	0.934366	6.82178	5.97934	0.0144744	0.0699833	0.934461	6.82016	5.99016	0.0143859	0.114104	1.82056	6.90086	252.084	9.12e-57	2.61e-55	1.82043	6.89941	252.045	9.30468e-57	4.61789e-55	NA	NA	NA	NA	NA	NA	NA	NA	NA	NA	NA	NA	NA	NA	NA	NA	NA	NA	NA	NA	NA	NA	NA	NA	NA	NA	NA
802	PIKFYVE	1.8051	7.16207	19.2396	1.15e-05	0.000253907	1.80521	7.16045	19.2766	1.13082e-05	0.000408161	1.81995	6.62433	207.712	4.34e-47	1e-45	1.81981	6.62288	207.679	4.40724e-47	1.7598e-45	NA	NA	NA	NA	NA	NA	NA	NA	NA	NA	NA	NA	NA	NA	NA	NA	NA	NA	NA	NA	NA	NA	NA	NA	NA	NA	NA
803	PSME4	2.01313	7.70173	20.8634	4.93e-06	0.000122697	2.01325	7.70011	20.9002	4.83842e-06	0.000196934	1.81736	7.61461	411.647	1.61e-91	7.59e-90	1.81722	7.61316	411.582	1.65874e-91	1.35817e-89	-0.114623	0	0	1	NA	NA	NA	NA	1.32128	0.637841	0.482745	4	1.68627	2.20184	1.30574	6	1.56141	535711	1843	3.6	0.784739	0.502583	10	-0.0015315	0.271554	5.75554	8.63651e-09
804	HIST2H2BE	0.769635	3.05528	1.52817	0.216388	0.419121	0.76979	3.05364	1.51798	0.217925	0.671224	1.81461	2.63297	9.82995	0.00171693	0.00355162	1.81448	2.63154	9.82844	0.00171834	0.00615056	NA	NA	NA	NA	NA	NA	NA	NA	NA	NA	NA	NA	NA	NA	NA	NA	NA	NA	NA	NA	NA	NA	NA	NA	NA	NA	NA
805	GPATCH2	1.90866	5.17501	24.549	7.24e-07	2.3e-05	1.90876	5.17339	24.3987	7.83203e-07	4.03945e-05	1.81148	4.98741	64.1367	1.16e-15	8.02e-15	1.81135	4.98596	64.1266	1.16678e-15	1.39583e-14	NA	NA	NA	NA	NA	NA	NA	NA	NA	NA	NA	NA	NA	NA	NA	NA	NA	NA	NA	NA	NA	NA	NA	NA	NA	NA	NA
806	2018-03-04	1.83743	6.69279	27.1708	1.86e-07	6.96e-06	NA	NA	NA	NA	NA	1.81036	6.89267	248.35	5.95e-56	1.67e-54	NA	NA	NA	NA	NA	NA	NA	NA	NA	NA	NA	NA	NA	NA	NA	NA	NA	NA	NA	NA	NA	NA	NA	NA	NA	NA	NA	NA	NA	NA	NA	NA
807	RBM4	1.7786	7.53916	23.1438	1.5e-06	4.39e-05	1.7787	7.53753	23.2205	1.44449e-06	7.00377e-05	1.80848	7.63098	413.004	8.13e-92	3.89e-90	1.80835	7.62953	412.939	8.40155e-92	6.93309e-90	0.41274	0.558651	1.35352	6	0.847648	0.231531	0.273146	5	0.830979	0.723932	0.87118	7	4.14983	2.7236	0.656315	19	3.36005	440580	364	3.73077	4.21599	1.25474	26	-0.00581233	0.159774	21.0664	1.61768e-98
808	SLC12A2	2.23911	6.99651	11.9406	0.000549225	0.00620701	2.23924	6.99488	11.9284	0.00055284	0.0102317	1.80676	6.43958	180.326	4.11e-41	7.96e-40	1.80662	6.43813	180.297	4.17341e-41	1.39842e-39	NA	NA	NA	NA	NA	NA	NA	NA	0.298214	0.475639	1.59496	6	1.33183	2.28067	1.71243	8	0.595521	335427	1212	3.57143	1.16796	1.96123	14	-0.00326192	0.219565	2.72713	0.00638872
809	OXSR1	1.7132	8.36556	16.6574	4.48e-05	0.000797603	1.71329	8.36395	16.6942	4.3915e-05	0.00128479	1.80635	8.71505	767.972	4.96e-169	5.54e-167	1.80622	8.71359	768.221	4.38177e-169	8.45924e-167	0.293752	0.794669	2.70524	17	0.806445	0.227904	0.282603	14	0.387941	0.484239	1.24823	67	0.270224	0.828542	3.06613	88	0.366341	880847	527	3.56774	0.660939	1.80416	155	-0.00164494	0.0629175	5.8487	4.95419e-09
810	AKR1B10	0.406869	1.65631	0.103592	0.747561	0.858776	0.40676	1.65466	0.102408	0.748958	1	1.80567	1.59112	3.06191	0.0801473	0.114773	1.80556	1.5897	3.06147	0.0801689	0.197193	NA	NA	NA	NA	NA	NA	NA	NA	NA	NA	NA	NA	NA	NA	NA	NA	NA	NA	NA	NA	NA	NA	NA	NA	NA	NA	NA
811	ZSWIM6	1.43356	6.22014	14.0066	0.000182174	0.00254574	1.43365	6.21851	14.0273	0.000180171	0.00415717	1.80439	6.24784	157.242	4.53e-36	7.58e-35	1.80426	6.24639	157.217	4.58849e-36	1.32997e-34	NA	NA	NA	NA	NA	NA	NA	NA	NA	NA	NA	NA	NA	NA	NA	NA	NA	NA	NA	NA	NA	NA	NA	NA	NA	NA	NA
812	ZNF394	1.36219	4.69365	9.32828	0.00225644	0.018183	1.36229	4.69202	9.30656	0.00228335	0.0301434	1.80342	4.58315	47.2609	6.21e-12	3.34e-11	1.80329	4.58171	47.2535	6.23757e-12	5.80527e-11	NA	NA	NA	NA	NA	NA	NA	NA	NA	NA	NA	NA	NA	NA	NA	NA	NA	NA	NA	NA	NA	NA	NA	NA	NA	NA	NA
813	WDR45B	1.14536	7.77892	4.77176	0.0289303	0.114125	1.14543	7.77729	4.77164	0.0289323	0.186698	1.80297	8.19621	561.305	4.37e-124	3.04e-122	1.80284	8.19476	559.084	1.3304e-123	1.58168e-121	-0.681661	0	0	1	NA	NA	NA	NA	0.837749	0.654098	0.780781	2	2.83428	3.76611	1.32877	2	0.837749	513447	344	3.5	2.8642	3.41893	4	0.0340195	0.588909	1.36478	0.172323
814	TMPPE	1.38689	3.29101	5.48271	0.0192054	0.0861428	1.38696	3.28937	5.44554	0.0196183	0.143194	1.802	3.01117	13.6246	0.000223244	0.000538175	1.80187	3.00974	13.6225	0.000223497	0.000932402	NA	NA	NA	NA	NA	NA	NA	NA	NA	NA	NA	NA	NA	NA	NA	NA	NA	NA	NA	NA	NA	NA	NA	NA	NA	NA	NA
815	CDR2	1.66655	5.2872	18.7794	1.47e-05	0.000309389	1.66665	5.28558	18.6555	1.56595e-05	0.000536683	1.80098	5.90786	123.22	1.25e-28	1.64e-27	1.80085	5.90641	123.201	1.26027e-28	2.86702e-27	NA	NA	NA	NA	NA	NA	NA	NA	NA	NA	NA	NA	NA	NA	NA	NA	NA	NA	NA	NA	NA	NA	NA	NA	NA	NA	NA
816	WDR43	1.65281	6.50442	9.11758	0.00253164	0.0199262	1.65293	6.50279	9.11256	0.00253861	0.0327127	1.80091	6.59024	199.341	2.91e-45	6.43e-44	1.80078	6.58879	199.309	2.95487e-45	1.13053e-43	NA	NA	NA	NA	NA	NA	NA	NA	0.169296	0.503452	2.97381	4	0.822672	1.37969	1.67709	7	0.465879	305951	677	3.63636	1.2417	2.66529	11	-0.0024451	0.264549	1.77027	0.076682
817	TRA2A	2.31671	6.60615	32.3203	1.31e-08	6.92e-07	2.3168	6.60453	32.3693	1.27487e-08	1.10399e-06	1.79821	6.78449	227.77	1.83e-51	4.58e-50	1.79808	6.78304	227.734	1.86002e-51	8.0536e-50	NA	NA	NA	NA	NA	NA	NA	NA	0.591466	0.509259	0.861011	8	-0.409972	0.844103	-2.05893	8	0.148043	1.13123e+06	282	3.5	1.03223	6.97251	16	0.000531975	0.206226	0.715291	0.474429
818	RBM7	1.92728	6.6299	28.1115	1.15e-07	4.71e-06	1.92738	6.62827	28.1849	1.1026e-07	7.4477e-06	1.79799	6.69725	214.241	1.63e-48	3.89e-47	1.79786	6.6958	214.207	1.65953e-48	6.83394e-47	NA	NA	NA	NA	-0.637652	0	0	1	0.823016	0.192267	0.233612	6	0.534228	1.39124	2.6042	4	0.737795	990529	267	3.4	0.393501	0.533347	10	-0.00372337	0.265997	2.78769	0.00530847
819	CYCS	2.34074	7.43384	27.7469	1.38e-07	5.45e-06	2.34083	7.43222	27.7869	1.35443e-07	8.88264e-06	1.79664	7.91449	495.9	7.42e-110	4.31e-108	1.79651	7.91304	495.821	7.71476e-110	7.80489e-108	NA	NA	NA	NA	NA	NA	NA	NA	NA	NA	NA	NA	NA	NA	NA	NA	NA	NA	NA	NA	NA	NA	NA	NA	NA	NA	NA
820	C9orf72	2.57954	4.16366	11.4612	0.000710639	0.00760757	2.57964	4.16203	11.4171	0.000727721	0.0127082	1.79507	3.6996	23.8608	1.04e-06	3.46e-06	1.79493	3.69817	23.857	1.03764e-06	6.00527e-06	NA	NA	NA	NA	NA	NA	NA	NA	NA	NA	NA	NA	NA	NA	NA	NA	NA	NA	NA	NA	NA	NA	NA	NA	NA	NA	NA
821	CTNNAL1	2.72169	6.48776	9.42674	0.00213844	0.0174841	2.72183	6.48613	9.40612	0.00216262	0.0289492	1.79408	7.76208	445.861	5.74e-99	2.97e-97	1.79395	7.76062	445.79	5.94717e-99	5.32537e-97	NA	NA	NA	NA	NA	NA	NA	NA	NA	NA	NA	NA	5.78203	0	0	1	5.78203	348588	734	4	0	0	1	0.0996338	2.44598	2.32316	0.0201706
822	H2AFZ	3.02064	8.48764	46.2712	1.03e-11	1.09e-09	3.02076	8.48603	46.3865	9.70808e-12	1.67448e-09	1.79271	9.4863	1167.8	6.06e-256	1.17e-253	1.79258	9.48484	1172.91	4.7168e-257	1.57548e-254	-0.310598	0.950951	-3.06168	11	0.352649	1.60561	4.55301	11	-0.0339338	1.05653	-31.135	14	-0.696185	1.2619	-1.81259	11	-0.154216	2.00226e+06	128	3.44	1.29274	-8.3827	25	0.000497448	0.160195	-0.965782	0.334153
823	RBM25	2.30469	8.12404	31.3009	2.21e-08	1.09e-06	2.30477	8.12242	31.3858	2.11525e-08	1.72524e-06	1.79086	8.16973	586.796	1.25e-129	9.41e-128	1.79073	8.16827	586.702	1.30672e-129	1.69736e-127	-0.322455	0.301074	-0.933692	3	0.274663	0.297303	1.08243	4	0.683113	0.780834	1.14305	30	0.555817	1.39991	2.51865	24	0.677675	687054	843	3.44444	1.01196	1.49328	54	0.000638418	0.111518	6.07109	1.27044e-09
824	ZFAND5	1.57642	8.43196	17.2805	3.22e-05	0.000609012	1.57652	8.43033	17.3439	3.11901e-05	0.000968044	1.79045	8.17108	587.142	1.05e-129	7.97e-128	1.79031	8.16962	587.048	1.09892e-129	1.43631e-127	NA	NA	NA	NA	NA	NA	NA	NA	2.8108	0.621375	0.221067	2	4.74206	0.625773	0.131962	2	3.77423	140231	213	3.5	1.30769	0.346479	4	0.0100481	0.648669	5.80293	6.51646e-09
825	ARL5B	1.53199	3.81468	6.11025	0.01344	0.0665072	1.53209	3.81304	6.07854	0.0136834	0.110069	1.7868	3.39125	18.4802	1.72e-05	4.9e-05	1.78666	3.38982	18.4773	1.71944e-05	8.48551e-05	NA	NA	NA	NA	NA	NA	NA	NA	-0.983478	0	0	1	NA	NA	NA	NA	-0.983478	119625	179	3	0	0	1	0.00406726	1.75916	-0.561372	0.574544
826	AMD1	2.29512	7.22066	20.2126	6.93e-06	0.000163223	2.29524	7.21903	20.2201	6.90221e-06	0.000266991	1.78617	7.67928	418.191	6.04e-93	2.94e-91	1.78603	7.67783	418.124	6.24844e-93	5.25944e-91	NA	NA	NA	NA	NA	NA	NA	NA	NA	NA	NA	NA	NA	NA	NA	NA	NA	NA	NA	NA	NA	NA	NA	NA	NA	NA	NA
827	NCOA1	0.881156	6.9775	1.36703	0.242323	0.448871	0.881293	6.97585	1.36525	0.24263	0.712807	1.78533	6.09751	138.92	4.59e-32	6.73e-31	1.7852	6.09607	138.898	4.63707e-32	1.17848e-30	NA	NA	NA	NA	NA	NA	NA	NA	NA	NA	NA	NA	NA	NA	NA	NA	NA	NA	NA	NA	NA	NA	NA	NA	NA	NA	NA
828	RBM27	1.86868	6.83597	16.9995	3.74e-05	0.00069091	1.86879	6.83434	17.013	3.71249e-05	0.0011273	1.78451	6.59342	196.787	1.05e-44	2.26e-43	1.78438	6.59197	196.755	1.06635e-44	3.97154e-43	NA	NA	NA	NA	-0.049522	0.0160823	-0.324751	2	1.04071	0	0	1	NA	NA	NA	NA	1.04071	303599	1060	3	0	0	1	0.135915	2.13972	0.422855	0.672401
829	KIAA0020	2.57415	6.38931	35.1901	2.99e-09	1.89e-07	2.57426	6.38769	35.2329	2.92546e-09	3.01767e-07	1.7831	6.277	157.382	4.22e-36	7.07e-35	1.78297	6.27555	157.356	4.27849e-36	1.24182e-34	-0.346823	0	0	1	-0.204993	0.288184	-1.40582	3	0.716028	0.765483	1.06907	12	1.0775	0.729412	0.676945	10	1.01196	228116	648	3.45455	0.820125	0.810434	22	-0.00916979	0.181171	5.63627	1.73772e-08
830	ATF7IP	1.00693	6.92944	7.06752	0.00784939	0.0454273	1.00704	6.92781	7.08376	0.00777857	0.0741324	1.78246	6.59732	196.955	9.65e-45	2.08e-43	1.78232	6.59587	196.923	9.80074e-45	3.65668e-43	NA	NA	NA	NA	NA	NA	NA	NA	NA	NA	NA	NA	NA	NA	NA	NA	NA	NA	NA	NA	NA	NA	NA	NA	NA	NA	NA
831	PPTC7	1.30615	4.15842	6.5943	0.0102306	0.0545463	1.30621	4.15678	6.55545	0.0104564	0.0909604	1.7812	3.68524	23.2915	1.39e-06	4.6e-06	1.78107	3.68381	23.2878	1.39481e-06	7.9693e-06	NA	NA	NA	NA	NA	NA	NA	NA	NA	NA	NA	NA	NA	NA	NA	NA	NA	NA	NA	NA	NA	NA	NA	NA	NA	NA	NA
832	KANSL2	1.41033	5.52141	14.0032	0.000182503	0.00254574	1.41043	5.51978	13.9474	0.000187993	0.00428958	1.78031	5.71991	105.745	8.39e-25	9.34e-24	1.78017	5.71846	105.728	8.45831e-25	1.63142e-23	NA	NA	NA	NA	NA	NA	NA	NA	NA	NA	NA	NA	NA	NA	NA	NA	NA	NA	NA	NA	NA	NA	NA	NA	NA	NA	NA
833	FRMD5	3.47341	3.60407	23.539	1.22e-06	3.68e-05	3.47351	3.60243	23.3815	1.32847e-06	6.48609e-05	1.77979	3.02924	13.5587	0.000231215	0.000555748	1.77965	3.02781	13.5566	0.000231479	0.000963029	NA	NA	NA	NA	NA	NA	NA	NA	NA	NA	NA	NA	NA	NA	NA	NA	NA	NA	NA	NA	NA	NA	NA	NA	NA	NA	NA
834	CNST	1.15774	5.23805	9.87976	0.00167107	0.0146301	1.15783	5.23642	9.81568	0.00173031	0.0246853	1.7783	5.57646	95.2587	1.67e-22	1.72e-21	1.77817	5.57502	95.2434	1.68361e-22	3.00493e-21	NA	NA	NA	NA	NA	NA	NA	NA	NA	NA	NA	NA	NA	NA	NA	NA	NA	NA	NA	NA	NA	NA	NA	NA	NA	NA	NA
835	ABRACL	1.23234	4.44802	5.72498	0.0167252	0.0781056	1.23243	4.44639	5.70984	0.0168701	0.128716	1.77517	5.18248	71.493	2.78e-17	2.12e-16	1.77504	5.18104	71.4816	2.79862e-17	3.68532e-16	NA	NA	NA	NA	NA	NA	NA	NA	NA	NA	NA	NA	NA	NA	NA	NA	NA	NA	NA	NA	NA	NA	NA	NA	NA	NA	NA
836	PABPC4L	NA	NA	NA	NA	NA	1.97185	1.68003	1.57928	0.208865	0.655014	1.77445	1.81312	3.98727	0.0458452	0.0697575	1.77433	1.8117	3.98668	0.0458614	0.120287	NA	NA	NA	NA	NA	NA	NA	NA	NA	NA	NA	NA	NA	NA	NA	NA	NA	NA	NA	NA	NA	NA	NA	NA	NA	NA	NA
837	HBP1	1.3221	7.07821	13.5438	0.00023306	0.00309649	1.32221	7.07658	13.5851	0.000227994	0.005011	1.77414	7.32411	323.895	2.05e-72	7.45e-71	1.77401	7.32266	323.842	2.10842e-72	1.3244e-70	NA	NA	NA	NA	NA	NA	NA	NA	NA	NA	NA	NA	NA	NA	NA	NA	NA	NA	NA	NA	NA	NA	NA	NA	NA	NA	NA
838	CCDC126	1.5075	3.39532	7.08045	0.00779292	0.0451925	1.5076	3.39368	7.02302	0.00804682	0.0756272	1.77385	3.52349	20.3284	6.52e-06	1.98e-05	1.77372	3.52206	20.3252	6.53354e-06	3.42515e-05	NA	NA	NA	NA	NA	NA	NA	NA	NA	NA	NA	NA	NA	NA	NA	NA	NA	NA	NA	NA	NA	NA	NA	NA	NA	NA	NA
839	NAF1	1.88305	4.97109	20.8498	4.97e-06	0.000123097	1.88315	4.96946	20.7645	5.19367e-06	0.000209762	1.77304	4.91034	58.5081	2.02e-14	1.3e-13	1.7729	4.9089	58.4987	2.03429e-14	2.2554e-13	NA	NA	NA	NA	NA	NA	NA	NA	0.359657	0	0	1	-0.245888	0	0	1	0.0568848	463033	494	3.5	0.302772	5.32255	2	0.0548122	1.50745	0.00137493	0.998903
840	ADCY10P1	0.386737	2.59416	0.301187	0.583139	0.752082	0.386802	2.59251	0.29971	0.584064	1	1.77197	2.23929	6.43135	0.0112123	0.0197096	1.77184	2.23787	6.43036	0.0112186	0.0341344	NA	NA	NA	NA	NA	NA	NA	NA	NA	NA	NA	NA	NA	NA	NA	NA	NA	NA	NA	NA	NA	NA	NA	NA	NA	NA	NA
841	RHOB	1.44273	7.09515	10.7733	0.00102973	0.0101404	1.44285	7.09352	10.7862	0.00102257	0.0165523	1.77187	6.94001	247.687	8.29e-56	2.32e-54	1.77173	6.93856	247.647	8.46281e-56	4.10235e-54	NA	NA	NA	NA	NA	NA	NA	NA	2.89334	1.24451	0.430131	6	2.28002	0.54074	0.237164	5	2.62432	1.16335e+06	196	3.45455	0.821858	0.31317	11	-0.00768377	0.276421	9.52172	1.70329e-21
842	RICTOR	1.61025	6.68928	15.9683	6.44e-05	0.00107863	1.61036	6.68765	15.994	6.35446e-05	0.00174565	1.77099	5.99333	127.318	1.58e-29	2.14e-28	1.77085	5.99188	127.297	1.59921e-29	3.75163e-28	NA	NA	NA	NA	NA	NA	NA	NA	NA	NA	NA	NA	NA	NA	NA	NA	NA	NA	NA	NA	NA	NA	NA	NA	NA	NA	NA
843	AHR	1.47186	8.19377	14.7221	0.000124578	0.00188715	1.47196	8.19215	14.7713	0.000121369	0.00302963	1.76968	8.21717	594.084	3.24e-131	2.59e-129	1.76955	8.21571	593.988	3.39919e-131	4.70586e-129	NA	NA	NA	NA	NA	NA	NA	NA	-4.20206	0	0	1	NA	NA	NA	NA	-4.20206	131055	848	3	0	0	1	0.0607861	2.18714	-1.94905	0.0512891
844	UNC80	5.61905	2.69255	18.9139	1.37e-05	0.00029216	5.61906	2.69091	18.8041	1.44858e-05	0.000503012	1.76549	1.98745	4.86372	0.0274271	0.0441265	1.76536	1.98603	4.86298	0.0274389	0.0763146	NA	NA	NA	NA	NA	NA	NA	NA	NA	NA	NA	NA	NA	NA	NA	NA	NA	NA	NA	NA	NA	NA	NA	NA	NA	NA	NA
845	TCEB3	1.74142	7.58666	21.8885	2.89e-06	7.69e-05	1.74152	7.58503	21.9604	2.78341e-06	0.000121638	1.76393	7.45654	351.442	2.06e-78	8.31e-77	1.76379	7.45508	351.385	2.11649e-78	1.47965e-76	NA	NA	NA	NA	0.926434	0	0	1	-0.474542	0.593749	-1.2512	2	3.4895	2.98479	0.855364	6	1.68191	311032	798	3.75	3.71242	2.20727	8	-0.0189518	0.298308	5.7017	1.18618e-08
846	DGKE	1.61749	2.32934	3.5288	0.0603114	0.185342	1.61759	2.3277	3.5149	0.0608195	0.304069	1.7608	1.97392	4.76797	0.0289941	0.0464019	1.76068	1.9725	4.76724	0.0290063	0.0802352	NA	NA	NA	NA	NA	NA	NA	NA	NA	NA	NA	NA	NA	NA	NA	NA	NA	NA	NA	NA	NA	NA	NA	NA	NA	NA	NA
847	RIT1	1.37177	6.06202	14.0248	0.000180419	0.00253315	1.37186	6.0604	14.0482	0.000178185	0.00412945	1.75727	5.95291	122.143	2.15e-28	2.8e-27	1.75713	5.95146	122.123	2.16909e-28	4.90271e-27	NA	NA	NA	NA	NA	NA	NA	NA	NA	NA	NA	NA	NA	NA	NA	NA	NA	NA	NA	NA	NA	NA	NA	NA	NA	NA	NA
848	CSPP1	1.98384	4.71121	23.28	1.4e-06	4.14e-05	1.98393	4.70958	23.2123	1.45069e-06	7.01766e-05	1.75704	4.56702	44.7265	2.27e-11	1.17e-10	1.7569	4.56558	44.7193	2.27406e-11	2.03803e-10	NA	NA	NA	NA	NA	NA	NA	NA	NA	NA	NA	NA	NA	NA	NA	NA	NA	NA	NA	NA	NA	NA	NA	NA	NA	NA	NA
849	TLE4	0.956561	7.37802	6.09012	0.013594	0.0668823	0.956674	7.37638	6.10582	0.0134738	0.10926	1.75663	6.69264	205.488	1.33e-46	3.03e-45	1.7565	6.69119	205.455	1.34775e-46	5.33096e-45	NA	NA	NA	NA	NA	NA	NA	NA	NA	NA	NA	NA	NA	NA	NA	NA	NA	NA	NA	NA	NA	NA	NA	NA	NA	NA	NA
850	SCYL2	1.74355	7.02868	20.2402	6.83e-06	0.000161185	1.74366	7.02705	20.2858	6.66935e-06	0.000259414	1.75595	7.21222	294.668	4.78e-66	1.59e-64	1.75581	7.21077	294.62	4.89743e-66	2.82347e-64	-0.678412	0	0	1	-1.39442	0	0	1	0.471584	1.06378	2.25577	11	0.495518	0.777716	1.5695	13	0.483551	236121	929	3.54167	1.00461	2.07757	24	-0.00263453	0.170654	2.84895	0.00438636
851	HSPBAP1	0.856239	3.23215	1.81774	0.177583	0.371973	0.856335	3.2305	1.8059	0.179001	0.599415	1.75525	3.237	15.7998	7.04e-05	0.000184329	1.75512	3.23557	15.7973	7.05048e-05	0.000319198	NA	NA	NA	NA	NA	NA	NA	NA	NA	NA	NA	NA	NA	NA	NA	NA	NA	NA	NA	NA	NA	NA	NA	NA	NA	NA	NA
852	MRPL44	1.47234	5.71666	12.8219	0.000342591	0.00419225	1.47244	5.71502	12.7871	0.00034902	0.00699469	1.75409	5.76801	106.764	5.01e-25	5.68e-24	1.75396	5.76656	106.747	5.0588e-25	9.93026e-24	-0.899567	0	0	1	-0.377154	0.421846	-1.1185	3	-1.15933	1.28803	-1.11101	2	-0.424018	0	0	1	-0.424018	363266	332	3.33333	1.28803	-3.03768	3	0.00475734	0.741669	-0.578123	0.563181
853	EIF5A2	2.01289	4.78791	20.398	6.29e-06	0.000151767	2.013	4.78629	20.328	6.52388e-06	0.000256067	1.75217	4.78132	52.1824	5.06e-13	2.96e-12	1.75204	4.77988	52.174	5.0795e-13	5.1537e-12	NA	NA	NA	NA	NA	NA	NA	NA	NA	NA	NA	NA	NA	NA	NA	NA	NA	NA	NA	NA	NA	NA	NA	NA	NA	NA	NA
854	RBM14	1.97609	6.82279	24.426	7.72e-07	2.42e-05	1.97619	6.82117	24.4662	7.56247e-07	3.92592e-05	1.75008	6.85763	229.115	9.3e-52	2.35e-50	1.74994	6.85618	229.078	9.47272e-52	4.13557e-50	0.139177	0.245461	1.76366	14	0.0536334	0.27006	5.0353	12	0.521104	0.873507	1.67626	42	-0.0674421	1.02049	-15.1313	40	0.320123	840123	669	3.4878	1.19493	3.73273	82	-0.00225977	0.08959	3.59843	0.000320148
855	DCP2	1.87312	6.45007	23.9814	9.73e-07	2.98e-05	1.87323	6.44845	24.0298	9.48554e-07	4.78667e-05	1.74516	6.40832	166.535	4.23e-38	7.51e-37	1.74502	6.40687	166.508	4.2855e-38	1.31842e-36	NA	NA	NA	NA	NA	NA	NA	NA	NA	NA	NA	NA	NA	NA	NA	NA	NA	NA	NA	NA	NA	NA	NA	NA	NA	NA	NA
856	KIAA1551	1.73102	5.79726	18.8804	1.39e-05	0.000295369	1.73113	5.79563	18.8532	1.41177e-05	0.000492668	1.74502	5.66551	98.3712	3.47e-23	3.66e-22	1.74489	5.66407	98.3552	3.49685e-23	6.38752e-22	NA	NA	NA	NA	NA	NA	NA	NA	NA	NA	NA	NA	NA	NA	NA	NA	NA	NA	NA	NA	NA	NA	NA	NA	NA	NA	NA
857	RAPGEF5	1.98296	3.09075	9.36552	0.00221105	0.0178957	1.98307	3.08911	9.30764	0.002282	0.0301434	1.74169	1.61524	2.98175	0.0842084	0.119863	1.74157	1.61382	2.9813	0.0842314	0.205839	NA	NA	NA	NA	NA	NA	NA	NA	NA	NA	NA	NA	NA	NA	NA	NA	NA	NA	NA	NA	NA	NA	NA	NA	NA	NA	NA
858	CD36	1.67751	1.67792	1.66738	0.19661	0.396954	1.67762	1.67628	1.66057	0.197526	0.635849	1.74106	2.40663	7.39491	0.00654086	0.0120827	1.74093	2.4052	7.39374	0.00654511	0.0209251	NA	NA	NA	NA	NA	NA	NA	NA	NA	NA	NA	NA	NA	NA	NA	NA	NA	NA	NA	NA	NA	NA	NA	NA	NA	NA	NA
859	AMBRA1	1.64288	6.24305	19.4398	1.04e-05	0.000231443	1.64299	6.24143	19.4802	1.01649e-05	0.000372001	1.74055	5.79407	107.383	3.67e-25	4.17e-24	1.74042	5.79263	107.365	3.70207e-25	7.28062e-24	NA	NA	NA	NA	NA	NA	NA	NA	NA	NA	NA	NA	NA	NA	NA	NA	NA	NA	NA	NA	NA	NA	NA	NA	NA	NA	NA
860	ZNF280C	2.24588	4.53552	25.8334	3.72e-07	1.26e-05	2.24598	4.5339	25.7757	3.83493e-07	2.11807e-05	1.73651	3.91229	26.6832	2.4e-07	8.55e-07	1.73638	3.91086	26.6788	2.40239e-07	1.48381e-06	NA	NA	NA	NA	NA	NA	NA	NA	NA	NA	NA	NA	NA	NA	NA	NA	NA	NA	NA	NA	NA	NA	NA	NA	NA	NA	NA
861	MYC	1.38564	7.06659	3.89856	0.0483276	0.160729	1.38577	7.06495	3.89381	0.0484643	0.262911	1.734	7.50566	353.334	7.96e-79	3.24e-77	1.73387	7.50421	353.276	8.19837e-79	5.76984e-77	NA	NA	NA	NA	NA	NA	NA	NA	NA	NA	NA	NA	NA	NA	NA	NA	NA	NA	NA	NA	NA	NA	NA	NA	NA	NA	NA
862	RLF	1.6	6.65983	15.4242	8.59e-05	0.00139328	1.6001	6.6582	15.4446	8.49571e-05	0.00226298	1.73168	6.68178	199.092	3.3e-45	7.27e-44	1.73154	6.68033	199.059	3.35115e-45	1.27751e-43	NA	NA	NA	NA	NA	NA	NA	NA	NA	NA	NA	NA	NA	NA	NA	NA	NA	NA	NA	NA	NA	NA	NA	NA	NA	NA	NA
863	WASF1	1.56111	5.47154	14.4259	0.000145786	0.00213306	1.5612	5.46991	14.3569	0.000151221	0.00361196	1.73086	5.50984	86.8291	1.18e-20	1.1e-19	1.73073	5.50839	86.8148	1.19175e-20	1.92315e-19	NA	NA	NA	NA	NA	NA	NA	NA	3.23014	0	0	1	NA	NA	NA	NA	3.23014	220549	559	3	0	0	1	0.0692052	2.19044	1.44306	0.149004
864	PRTG	0.987045	3.17265	2.15963	0.141679	0.322731	0.987083	3.17101	2.14207	0.143308	0.523911	1.73058	3.0531	13.209	0.000278607	0.000660001	1.73045	3.05167	13.2069	0.000278924	0.00114346	NA	NA	NA	NA	NA	NA	NA	NA	NA	NA	NA	NA	NA	NA	NA	NA	NA	NA	NA	NA	NA	NA	NA	NA	NA	NA	NA
865	C3	-5.5795	8.27908	53.9186	2.09e-13	2.77e-11	-5.57944	8.27741	53.8754	2.13615e-13	4.63412e-11	1.73051	2.21611	6.03542	0.0140216	0.0241132	1.73038	2.21468	6.03447	0.0140291	0.0417265	-13.7928	5.38168	-0.390181	60	-11.438	4.21953	-0.368905	65	-8.61022	4.6113	-0.535562	67	9.70975	3.15974	0.325419	85	6.73853	2.31449e+06	1663	3.55921	17.7978	2.64119	152	-0.00200942	0.0662949	101.675	0
866	RAPGEF6	1.8405	5.74162	20.2574	6.77e-06	0.000160327	1.84061	5.73999	20.2124	6.93012e-06	0.000267089	1.72991	5.96277	119.813	6.95e-28	8.8e-27	1.72977	5.96132	119.793	7.02212e-28	1.53603e-26	NA	NA	NA	NA	NA	NA	NA	NA	NA	NA	NA	NA	NA	NA	NA	NA	NA	NA	NA	NA	NA	NA	NA	NA	NA	NA	NA
867	WHAMM	1.00174	5.49813	3.85301	0.0496568	0.163669	1.00183	5.4965	3.83888	0.050077	0.268781	1.72726	5.26589	72.5615	1.62e-17	1.25e-16	1.72712	5.26445	72.5495	1.62893e-17	2.18051e-16	NA	NA	NA	NA	NA	NA	NA	NA	NA	NA	NA	NA	NA	NA	NA	NA	NA	NA	NA	NA	NA	NA	NA	NA	NA	NA	NA
868	DAGLB	0.811671	5.536	4.94799	0.0261211	0.106682	0.811772	5.53436	4.92735	0.0264348	0.175867	1.72587	5.97024	119.998	6.33e-28	8.04e-27	1.72574	5.9688	119.978	6.39742e-28	1.4067e-26	NA	NA	NA	NA	NA	NA	NA	NA	-1.127	0	0	1	2.32614	0	0	1	0.599571	89404	672	3.5	1.72657	2.87967	2	0.0287831	1.46198	0.390421	0.696225
869	TRA2B	2.45138	8.21178	36.7119	1.37e-09	9.13e-08	2.45148	8.21016	36.8264	1.29127e-09	1.42262e-07	1.72344	8.35616	624.376	8.36e-138	7.25e-136	1.72331	8.35471	624.273	8.79843e-138	1.32247e-135	0.650422	0	0	1	2.79215	0	0	1	0.668928	0.30702	0.458973	7	-0.325622	0.370181	-1.13684	11	0.0625648	1.30395e+06	288	3.61111	1.02091	16.3177	18	0.00147649	0.192036	0.318109	0.750402
870	MAN2A1	0.853172	8.31997	2.8422	0.0918186	0.243933	0.853298	8.31833	2.84452	0.091686	0.396008	1.72158	7.77316	419.321	3.43e-93	1.67e-91	1.72144	7.7717	419.252	3.55074e-93	3.00074e-91	0.0819223	1.44237	17.6066	10	0.610527	0.662556	1.08522	10	0.964871	0.783872	0.812411	22	0.94199	1.29452	1.37424	31	0.94199	673330	1144	3.58491	1.12909	1.19863	53	0.00298371	0.111968	8.38636	5.01435e-17
871	MTF2	2.0586	5.50011	29.0495	7.06e-08	3.06e-06	2.05869	5.49848	28.9198	7.54388e-08	5.32704e-06	1.72132	5.49981	85.3919	2.45e-20	2.25e-19	1.72119	5.49837	85.3778	2.46472e-20	3.9262e-19	NA	NA	NA	NA	NA	NA	NA	NA	NA	NA	NA	NA	NA	NA	NA	NA	NA	NA	NA	NA	NA	NA	NA	NA	NA	NA	NA
872	NKIRAS1	1.86087	4.49234	16.3044	5.39e-05	0.000927418	1.86097	4.4907	16.271	5.48988e-05	0.00154237	1.72053	4.53951	42.3143	7.77e-11	3.86e-10	1.7204	4.53807	42.3073	7.79992e-11	6.69934e-10	0.267204	0	0	1	1.90038	0	0	1	-0.336732	1.84539	-5.48029	2	NA	NA	NA	NA	-0.336732	240575	192	3	1.84539	-5.48029	2	0.0383794	1.52561	-0.245877	0.805778
873	LARP1B	1.61912	4.49901	12.3378	0.000443889	0.00520406	1.61922	4.49738	12.306	0.000451501	0.00867665	1.71709	5.11896	64.5835	9.25e-16	6.44e-15	1.71696	5.11752	64.5728	9.30314e-16	1.12058e-14	NA	NA	NA	NA	NA	NA	NA	NA	NA	NA	NA	NA	NA	NA	NA	NA	NA	NA	NA	NA	NA	NA	NA	NA	NA	NA	NA
874	PLEKHM1P	0.878202	4.79909	1.78119	0.182004	0.377784	0.87829	4.79746	1.77623	0.182613	0.606301	1.71492	3.69335	22.0066	2.72e-06	8.66e-06	1.71478	3.69191	22.003	2.7222e-06	1.50153e-05	NA	NA	NA	NA	NA	NA	NA	NA	NA	NA	NA	NA	NA	NA	NA	NA	NA	NA	NA	NA	NA	NA	NA	NA	NA	NA	NA
875	PNRC1	0.0454921	6.93868	0.0103827	0.91884	0.959188	0.0456121	6.93703	0.0104438	0.918602	1	1.71252	6.49967	172.036	2.66e-39	4.94e-38	1.71239	6.49822	172.008	2.69558e-39	8.67324e-38	NA	NA	NA	NA	NA	NA	NA	NA	NA	NA	NA	NA	5.14926	0	0	1	5.14926	241285	327	4	0	0	1	0.00521538	2.11881	2.4278	0.0151907
876	ROCK1	2.283	8.42472	31.4443	2.05e-08	1.02e-06	2.2831	8.42311	31.5374	1.95634e-08	1.6144e-06	1.71068	8.1334	530.253	2.49e-117	1.58e-115	1.71054	8.13195	530.164	2.60121e-117	2.86582e-115	0.409835	0.937946	2.28859	9	-0.0625687	0.270885	-4.32941	5	0.0634231	0.900695	14.2014	18	0.0817225	1.49045	18.2379	20	0.0817225	335592	1354	3.52632	1.39115	17.0229	38	0.0103848	0.12917	0.552277	0.580759
877	PSMD9	2.23794	6.68942	30.7011	3.01e-08	1.41e-06	2.23805	6.6878	30.7512	2.93317e-08	2.26921e-06	1.70949	6.50311	171.942	2.79e-39	5.16e-38	1.70935	6.50166	171.913	2.82693e-39	9.05436e-38	-0.242462	0.225177	-0.928711	6	0.856388	0.444529	0.519074	9	0.697068	0.355272	0.509666	15	0.123443	0.456733	3.69996	8	0.535372	1.67301e+06	223	3.34783	0.628767	1.17445	23	0.00410106	0.174394	3.04639	0.0023161
878	PSMD9	2.23794	6.68942	30.7011	3.01e-08	1.41e-06	1.30145	1.38448	0.642182	0.422922	0.963417	1.70949	6.50311	171.942	2.79e-39	5.16e-38	0.863038	1.64945	0.875945	0.349315	0.675051	-0.242462	0.225177	-0.928711	6	0.856388	0.444529	0.519074	9	0.697068	0.355272	0.509666	15	0.123443	0.456733	3.69996	8	0.535372	1.67301e+06	223	3.34783	0.628767	1.17445	23	0.00410106	0.174394	3.04639	0.0023161
879	ARG2	NA	NA	NA	NA	NA	0.940197	1.45272	0.391562	0.53148	1	1.70901	1.85115	3.92306	0.047628	0.0722203	1.70889	1.84972	3.92245	0.0476453	0.124546	NA	NA	NA	NA	NA	NA	NA	NA	NA	NA	NA	NA	NA	NA	NA	NA	NA	NA	NA	NA	NA	NA	NA	NA	NA	NA	NA
880	DDX21	2.19676	8.24652	11.4337	0.000721233	0.00768499	2.19689	8.24489	11.4272	0.000723749	0.0126494	1.70835	8.49037	628.292	1.18e-138	1.04e-136	1.70821	8.48892	628.163	1.25447e-138	1.92684e-136	0.0531144	0.312494	5.88342	10	0.570529	0.9422	1.65145	6	0.683141	0.725814	1.06247	56	0.412805	1.03937	2.51782	79	0.571965	769824	783	3.58519	1.05084	1.83725	135	-0.000866026	0.0728731	7.86066	3.82106e-15
881	TERF2IP	1.61232	7.33555	19.3798	1.07e-05	0.000238389	1.61242	7.33392	19.4409	1.03761e-05	0.00037907	1.70313	7.20638	278.828	1.35e-62	4.26e-61	1.703	7.20493	278.781	1.38405e-62	7.54522e-61	NA	NA	NA	NA	NA	NA	NA	NA	NA	NA	NA	NA	4.8243	1.43581	0.297621	4	4.8243	313760	399	4	1.43581	0.297621	4	0.0471798	0.556	8.59194	8.55146e-18
882	TRPS1	0.860181	5.60119	2.50382	0.11357	0.279698	0.860297	5.59955	2.49525	0.11419	0.453806	1.70209	5.27623	71.3242	3.03e-17	2.3e-16	1.70195	5.27479	71.3123	3.04926e-17	4.00534e-16	NA	NA	NA	NA	NA	NA	NA	NA	NA	NA	NA	NA	NA	NA	NA	NA	NA	NA	NA	NA	NA	NA	NA	NA	NA	NA	NA
883	SCML2	3.19784	4.23919	33.2528	8.09e-09	4.47e-07	3.19794	4.23756	33.1172	8.67677e-09	7.83628e-07	1.70068	4.14465	30.8117	2.84e-08	1.12e-07	1.70055	4.14321	30.8066	2.85071e-08	1.94955e-07	NA	NA	NA	NA	NA	NA	NA	NA	NA	NA	NA	NA	NA	NA	NA	NA	NA	NA	NA	NA	NA	NA	NA	NA	NA	NA	NA
884	MEX3C	2.02151	6.41126	26.1892	3.1e-07	1.07e-05	2.02161	6.40964	26.2353	3.02252e-07	1.719e-05	1.69974	6.00736	120.075	6.09e-28	7.75e-27	1.69961	6.00592	120.055	6.15422e-28	1.35464e-26	NA	NA	NA	NA	NA	NA	NA	NA	NA	NA	NA	NA	NA	NA	NA	NA	NA	NA	NA	NA	NA	NA	NA	NA	NA	NA	NA
885	POU2F1	0.914975	5.65898	4.15761	0.041448	0.14522	0.915083	5.65734	4.14422	0.0417768	0.238499	1.69905	5.1965	67.1227	2.55e-16	1.84e-15	1.69891	5.19506	67.1115	2.56579e-16	3.19479e-15	NA	NA	NA	NA	NA	NA	NA	NA	NA	NA	NA	NA	1.95602	1.88648	0.964447	2	1.95602	179364	766	4	1.88648	0.964447	2	0.00201997	1.43943	1.35749	0.174627
886	MARS2	2.04863	3.61143	12.7847	0.000349458	0.00426007	2.04867	3.60979	12.6808	0.000369432	0.00729949	1.69186	3.41799	17.2452	3.29e-05	9.02e-05	1.69173	3.41655	17.2423	3.29024e-05	0.00015629	NA	NA	NA	NA	NA	NA	NA	NA	NA	NA	NA	NA	NA	NA	NA	NA	NA	NA	NA	NA	NA	NA	NA	NA	NA	NA	NA
887	PPP2CA	1.90939	8.1489	25.408	4.64e-07	1.54e-05	1.90949	8.14728	25.503	4.41693e-07	2.42045e-05	1.69118	8.31864	589.675	2.95e-130	2.3e-128	1.69105	8.31719	589.576	3.099e-130	4.18027e-128	NA	NA	NA	NA	NA	NA	NA	NA	0.644169	0.504097	0.782554	7	0.96473	0.491392	0.509357	9	0.902585	461256	309	3.5625	0.559901	0.62033	16	0.00173887	0.213673	4.21601	2.48659e-05
888	IKZF5	1.58035	5.38715	14.9267	0.000111767	0.00173603	1.58044	5.38552	14.8473	0.000116575	0.00294135	1.69049	5.27675	70.5326	4.53e-17	3.4e-16	1.69036	5.2753	70.5208	4.55446e-17	5.91967e-16	NA	NA	NA	NA	NA	NA	NA	NA	NA	NA	NA	NA	NA	NA	NA	NA	NA	NA	NA	NA	NA	NA	NA	NA	NA	NA	NA
889	STK38L	2.1937	5.78395	25.4764	4.48e-07	1.49e-05	2.19381	5.78232	25.4224	4.6053e-07	2.49767e-05	1.69	5.46081	80.5033	2.9e-19	2.52e-18	1.68987	5.45937	80.4898	2.92216e-19	4.38908e-18	NA	NA	NA	NA	NA	NA	NA	NA	NA	NA	NA	NA	NA	NA	NA	NA	NA	NA	NA	NA	NA	NA	NA	NA	NA	NA	NA
890	LYAR	2.29178	4.89695	24.6594	6.84e-07	2.2e-05	2.29189	4.89532	24.589	7.09568e-07	3.72355e-05	1.68858	5.11105	62.4365	2.75e-15	1.86e-14	1.68844	5.10961	62.4261	2.76639e-15	3.23947e-14	0.0345702	0	0	1	NA	NA	NA	NA	0.271122	1.8208	6.71578	5	0.456823	1.49515	3.27293	12	0.310774	416044	379	3.70588	1.48743	4.78623	17	-0.000715688	0.199019	1.56513	0.117553
891	TXNL4B	1.1493	4.40101	6.58827	0.0102653	0.0546674	1.1494	4.39937	6.57152	0.0103623	0.090331	1.68785	4.55612	41.4838	1.19e-10	5.83e-10	1.68771	4.55469	41.4768	1.19275e-10	1.01206e-09	NA	NA	NA	NA	NA	NA	NA	NA	0.709068	0	0	1	NA	NA	NA	NA	0.709068	1.02904e+06	149	3	0	0	1	0.0482193	2.18357	0.302646	0.762159
892	NKX6-1	NA	NA	NA	NA	NA	1.09324	1.37628	0.458358	0.498392	1	1.68654	1.50222	2.39726	0.121548	0.165946	1.68643	1.5008	2.3969	0.121576	0.283973	NA	NA	NA	NA	NA	NA	NA	NA	NA	NA	NA	NA	NA	NA	NA	NA	NA	NA	NA	NA	NA	NA	NA	NA	NA	NA	NA
893	FNBP1	1.05914	5.75372	9.63171	0.00191246	0.0161287	1.05924	5.75208	9.61583	0.00192907	0.0266536	1.68085	5.71443	95.6725	1.36e-22	1.41e-21	1.68072	5.71298	95.6564	1.3666e-22	2.45579e-21	NA	NA	NA	NA	-7.52682	0	0	1	NA	NA	NA	NA	NA	NA	NA	NA	NA	NA	NA	NA	NA	NA	NA	NA	NA	NA	NA
894	DSE	0.327904	6.73169	0.638438	0.424277	0.627978	0.328002	6.73005	0.639337	0.423951	0.964957	1.67934	6.38926	154.044	2.27e-35	3.68e-34	1.6792	6.38781	154.018	2.29546e-35	6.45768e-34	NA	NA	NA	NA	NA	NA	NA	NA	NA	NA	NA	NA	NA	NA	NA	NA	NA	NA	NA	NA	NA	NA	NA	NA	NA	NA	NA
895	UBBP4	NA	NA	NA	NA	NA	1.2337	1.35234	0.551032	0.457896	0.999534	1.6788	1.45284	2.20462	0.137598	0.185106	1.67868	1.45142	2.2043	0.137627	0.316097	NA	NA	NA	NA	NA	NA	NA	NA	NA	NA	NA	NA	NA	NA	NA	NA	NA	NA	NA	NA	NA	NA	NA	NA	NA	NA	NA
896	CEP85L	1.28935	5.23223	11.24	0.000800517	0.00830278	1.28946	5.23059	11.1742	0.000829449	0.013941	1.67791	5.27641	69.6403	7.12e-17	5.28e-16	1.67777	5.27496	69.6285	7.15946e-17	9.19198e-16	NA	NA	NA	NA	NA	NA	NA	NA	NA	NA	NA	NA	NA	NA	NA	NA	NA	NA	NA	NA	NA	NA	NA	NA	NA	NA	NA
897	SEMA3D	3.26777	2.52932	8.75701	0.00308415	0.0233462	3.26796	2.52768	8.68951	0.00320046	0.0394536	1.67082	2.57536	8.11577	0.00438818	0.00838389	1.67069	2.57393	8.11443	0.00439142	0.0145205	NA	NA	NA	NA	NA	NA	NA	NA	NA	NA	NA	NA	NA	NA	NA	NA	NA	NA	NA	NA	NA	NA	NA	NA	NA	NA	NA
898	E2F6	1.17586	4.60976	8.56871	0.00341989	0.0251908	1.17597	4.60812	8.54858	0.00345792	0.0416753	1.66754	4.8348	49.945	1.58e-12	8.96e-12	1.66741	4.83336	49.9366	1.58798e-12	1.55639e-11	NA	NA	NA	NA	NA	NA	NA	NA	NA	NA	NA	NA	NA	NA	NA	NA	NA	NA	NA	NA	NA	NA	NA	NA	NA	NA	NA
899	PPM1D	-0.348109	5.35749	0.282462	0.595092	0.761084	-0.34798	5.35582	0.281125	0.595965	1	1.66714	5.25903	68.0327	1.61e-16	1.17e-15	1.66701	5.25759	68.0212	1.61751e-16	2.04182e-15	NA	NA	NA	NA	NA	NA	NA	NA	NA	NA	NA	NA	NA	NA	NA	NA	NA	NA	NA	NA	NA	NA	NA	NA	NA	NA	NA
900	ZNF620	1.73817	2.30321	3.84427	0.0499161	0.164271	1.73823	2.30157	3.82831	0.0503938	0.269902	1.65976	1.676	2.98577	0.0839995	0.119627	1.65964	1.67458	2.9853	0.0840237	0.205438	NA	NA	NA	NA	NA	NA	NA	NA	NA	NA	NA	NA	NA	NA	NA	NA	NA	NA	NA	NA	NA	NA	NA	NA	NA	NA	NA
901	SLC25A4	1.33028	4.9309	6.27298	0.0122593	0.0624671	1.33038	4.92927	6.24974	0.0124212	0.10323	1.65905	5.10975	60.5395	7.21e-15	4.75e-14	1.65892	5.10831	60.5292	7.24948e-15	8.25938e-14	NA	NA	NA	NA	NA	NA	NA	NA	NA	NA	NA	NA	NA	NA	NA	NA	NA	NA	NA	NA	NA	NA	NA	NA	NA	NA	NA
902	RRN3P1	0.797921	2.18073	0.657553	0.417425	0.622075	0.798082	2.17909	0.650174	0.420051	0.959836	1.65736	1.94393	4.15914	0.0414105	0.0637791	1.65723	1.9425	4.15847	0.0414269	0.110111	NA	NA	NA	NA	NA	NA	NA	NA	NA	NA	NA	NA	NA	NA	NA	NA	NA	NA	NA	NA	NA	NA	NA	NA	NA	NA	NA
903	HECA	0.861826	5.74535	4.96626	0.0258465	0.106104	0.861931	5.74371	4.95606	0.0259994	0.174071	1.65506	5.79918	98.9964	2.53e-23	2.68e-22	1.65493	5.79773	98.9795	2.55131e-23	4.68475e-22	NA	NA	NA	NA	NA	NA	NA	NA	NA	NA	NA	NA	NA	NA	NA	NA	NA	NA	NA	NA	NA	NA	NA	NA	NA	NA	NA
904	ARID4B	1.37137	6.85818	15.5603	7.99e-05	0.00130595	1.37147	6.85655	15.6087	7.78949e-05	0.00209609	1.65449	6.55442	168.63	1.47e-38	2.66e-37	1.65435	6.55297	168.601	1.49558e-38	4.68049e-37	NA	NA	NA	NA	NA	NA	NA	NA	NA	NA	NA	NA	NA	NA	NA	NA	NA	NA	NA	NA	NA	NA	NA	NA	NA	NA	NA
905	RPS6KB1	1.48086	6.07605	16.0175	6.28e-05	0.0010537	1.48096	6.07442	16.0473	6.17791e-05	0.00170382	1.65284	6.29433	140.252	2.35e-32	3.46e-31	1.65271	6.29288	140.228	2.37378e-32	6.06944e-31	NA	NA	NA	NA	NA	NA	NA	NA	NA	NA	NA	NA	NA	NA	NA	NA	NA	NA	NA	NA	NA	NA	NA	NA	NA	NA	NA
906	RGPD5	1.44555	5.07299	11.0566	0.000883699	0.00897484	1.44566	5.07137	10.9975	0.000912324	0.0150962	1.6524	5.45371	77.1009	1.62e-18	1.34e-17	1.65227	5.45227	77.0877	1.63531e-18	2.32827e-17	NA	NA	NA	NA	NA	NA	NA	NA	NA	NA	NA	NA	NA	NA	NA	NA	NA	NA	NA	NA	NA	NA	NA	NA	NA	NA	NA
907	ARL4C	1.33404	3.79375	3.14711	0.0760616	0.21604	1.33413	3.79211	3.13066	0.0768328	0.353818	1.65215	3.34803	15.6466	7.63e-05	0.000198721	1.65202	3.3466	15.644	7.64563e-05	0.000344291	NA	NA	NA	NA	NA	NA	NA	NA	NA	NA	NA	NA	NA	NA	NA	NA	NA	NA	NA	NA	NA	NA	NA	NA	NA	NA	NA
908	RAB3IP	1.89553	3.8103	13.3785	0.000254528	0.00332719	1.8956	3.80867	13.2738	0.000269137	0.00569191	1.64815	3.81496	22.6507	1.94e-06	6.3e-06	1.64802	3.81352	22.6469	1.94678e-06	1.09214e-05	NA	NA	NA	NA	NA	NA	NA	NA	NA	NA	NA	NA	NA	NA	NA	NA	NA	NA	NA	NA	NA	NA	NA	NA	NA	NA	NA
909	RAB3IP	1.89553	3.8103	13.3785	0.000254528	0.00332719	0.0337455	0.979598	0.00144442	0.969683	1	1.64815	3.81496	22.6507	1.94e-06	6.3e-06	0.132022	0.879635	0.00936059	0.922925	1	NA	NA	NA	NA	NA	NA	NA	NA	NA	NA	NA	NA	NA	NA	NA	NA	NA	NA	NA	NA	NA	NA	NA	NA	NA	NA	NA
910	ZNF451	1.38764	6.68424	15.8528	6.85e-05	0.00114056	1.38774	6.68261	15.8991	6.6811e-05	0.00182822	1.64745	6.25877	136.008	1.99e-31	2.84e-30	1.64731	6.25732	135.985	2.01055e-31	4.97741e-30	NA	NA	NA	NA	NA	NA	NA	NA	NA	NA	NA	NA	NA	NA	NA	NA	NA	NA	NA	NA	NA	NA	NA	NA	NA	NA	NA
911	HIST1H2AC	-0.493841	5.5654	0.855981	0.354866	0.564214	-0.493762	5.56377	0.852463	0.355857	0.880388	1.64658	4.81662	48.2369	3.78e-12	2.07e-11	1.64645	4.81518	48.2286	3.79312e-12	3.59544e-11	-0.181846	1.41032	-7.75559	8	-0.185401	1.66767	-8.99496	6	NA	NA	NA	NA	NA	NA	NA	NA	NA	NA	NA	NA	NA	NA	NA	NA	NA	NA	NA
912	GRPEL2	1.88101	5.33882	23.3227	1.37e-06	4.06e-05	1.8811	5.33719	23.1827	1.4732e-06	7.09397e-05	1.64353	5.27052	66.9449	2.79e-16	2e-15	1.6434	5.26908	66.9334	2.80839e-16	3.48655e-15	NA	NA	NA	NA	NA	NA	NA	NA	NA	NA	NA	NA	NA	NA	NA	NA	NA	NA	NA	NA	NA	NA	NA	NA	NA	NA	NA
913	SMURF1	1.63416	6.24139	18.9028	1.38e-05	0.000292884	1.63426	6.23977	18.935	1.35247e-05	0.000475124	1.6416	6.2793	137.164	1.11e-31	1.6e-30	1.64147	6.27785	137.141	1.12332e-31	2.79741e-30	NA	NA	NA	NA	NA	NA	NA	NA	NA	NA	NA	NA	NA	NA	NA	NA	NA	NA	NA	NA	NA	NA	NA	NA	NA	NA	NA
914	FAM91A1	1.43777	7.17943	16.0258	6.25e-05	0.00105185	1.43787	7.1778	16.0757	6.08594e-05	0.00168287	1.64155	7.07156	238.59	7.98e-54	2.15e-52	1.64141	7.07011	238.549	8.14753e-54	3.79311e-52	NA	NA	NA	NA	NA	NA	NA	NA	2.34776	2.61094	1.1121	3	1.06782	3.1266	2.92801	2	2.34776	151422	838	3.4	4.43425	1.88872	5	-0.0118835	0.419051	5.63091	1.79262e-08
915	MTF1	1.14441	5.77704	11.0582	0.000882975	0.00897484	1.14451	5.77541	11.0434	0.000890035	0.0148055	1.64147	5.67462	89.3384	3.33e-21	3.2e-20	1.64134	5.67318	89.323	3.35339e-21	5.59156e-20	NA	NA	NA	NA	NA	NA	NA	NA	NA	NA	NA	NA	NA	NA	NA	NA	NA	NA	NA	NA	NA	NA	NA	NA	NA	NA	NA
916	IFRG15	2.11255	3.20937	11.3467	0.00075584	0.00796792	2.11264	3.20773	11.2696	0.000787846	0.0135115	1.6401	2.94978	11.0368	0.000893211	0.00194604	1.63997	2.94835	11.0349	0.000894112	0.00337078	NA	NA	NA	NA	NA	NA	NA	NA	NA	NA	NA	NA	NA	NA	NA	NA	NA	NA	NA	NA	NA	NA	NA	NA	NA	NA	NA
917	RGS4	3.39704	8.26436	11.0064	0.000907963	0.00917226	3.39719	8.26275	10.9854	0.000918346	0.0151567	1.63901	9.91378	1085.62	4.41e-238	7.15e-236	1.63888	9.91232	1088.58	1.00193e-238	2.81116e-236	NA	NA	NA	NA	NA	NA	NA	NA	NA	NA	NA	NA	NA	NA	NA	NA	NA	NA	NA	NA	NA	NA	NA	NA	NA	NA	NA
918	SNRNP48	2.03411	5.84612	26.4291	2.73e-07	9.74e-06	2.03421	5.84449	26.4055	2.76747e-07	1.61089e-05	1.63853	5.99469	111.818	3.92e-26	4.61e-25	1.63839	5.99324	111.799	3.95414e-26	8.04709e-25	NA	NA	NA	NA	NA	NA	NA	NA	NA	NA	NA	NA	NA	NA	NA	NA	NA	NA	NA	NA	NA	NA	NA	NA	NA	NA	NA
919	C10orf137	1.9674	5.74812	29.7029	5.04e-08	2.24e-06	1.9675	5.74649	29.6487	5.1787e-08	3.77172e-06	1.6375	5.50514	78.7916	6.9e-19	5.82e-18	1.63736	5.50369	78.778	6.94955e-19	1.01414e-17	NA	NA	NA	NA	NA	NA	NA	NA	NA	NA	NA	NA	NA	NA	NA	NA	NA	NA	NA	NA	NA	NA	NA	NA	NA	NA	NA
920	FAM58A	0.991325	4.2661	3.90366	0.048181	0.160391	0.991425	4.26446	3.88821	0.0486263	0.263451	1.63647	4.52103	38.353	5.9e-10	2.73e-09	1.63634	4.51959	38.3463	5.9239e-10	4.73979e-09	NA	NA	NA	NA	NA	NA	NA	NA	0.794517	0	0	1	NA	NA	NA	NA	0.794517	77621.3	248	3	0	0	1	0.0238614	2.07526	0.371354	0.710374
921	KSR1	1.09995	3.95331	4.08996	0.0431388	0.148982	1.10004	3.95167	4.06217	0.043854	0.246018	1.63459	3.3447	15.3245	9.05e-05	0.000233053	1.63445	3.34327	15.3218	9.06626e-05	0.00040377	NA	NA	NA	NA	NA	NA	NA	NA	NA	NA	NA	NA	NA	NA	NA	NA	NA	NA	NA	NA	NA	NA	NA	NA	NA	NA	NA
922	MED17	1.86442	5.84511	13.7996	0.00020338	0.00279452	1.86452	5.84348	13.7744	0.000206126	0.00461928	1.63343	6.11955	121.508	2.96e-28	3.84e-27	1.6333	6.11811	121.487	2.98907e-28	6.70564e-27	NA	NA	NA	NA	NA	NA	NA	NA	NA	NA	NA	NA	NA	NA	NA	NA	NA	NA	NA	NA	NA	NA	NA	NA	NA	NA	NA
923	ZNF473	1.25537	4.04941	6.53017	0.010606	0.0560178	1.25548	4.04777	6.49248	0.0108332	0.0931981	1.63343	4.50287	37.7159	8.18e-10	3.73e-09	1.63329	4.50144	37.7094	8.21074e-10	6.47353e-09	NA	NA	NA	NA	NA	NA	NA	NA	NA	NA	NA	NA	NA	NA	NA	NA	NA	NA	NA	NA	NA	NA	NA	NA	NA	NA	NA
924	MKI67IP	1.60044	6.02494	9.36599	0.00221049	0.0178957	1.60055	6.02331	9.35922	0.00221866	0.0294581	1.63335	6.38849	146.851	8.46e-34	1.3e-32	1.63322	6.38704	146.825	8.56801e-34	2.2736e-32	NA	NA	NA	NA	NA	NA	NA	NA	NA	NA	NA	NA	NA	NA	NA	NA	NA	NA	NA	NA	NA	NA	NA	NA	NA	NA	NA
925	UBAP1	0.901659	6.64235	5.33718	0.0208752	0.0915051	0.901766	6.64072	5.34532	0.0207779	0.149225	1.63199	6.93544	214.954	1.14e-48	2.74e-47	1.63185	6.93399	214.917	1.1618e-48	4.82203e-47	NA	NA	NA	NA	NA	NA	NA	NA	NA	NA	NA	NA	NA	NA	NA	NA	NA	NA	NA	NA	NA	NA	NA	NA	NA	NA	NA
926	ATP1B1	1.36625	5.86496	3.4998	0.0613761	0.187132	1.36638	5.86331	3.4911	0.0616997	0.305698	1.63084	6.43724	151.578	7.83e-35	1.25e-33	1.63071	6.43579	151.552	7.939e-35	2.18786e-33	NA	NA	NA	NA	NA	NA	NA	NA	0.649429	1.35621	2.08831	6	-0.225666	0.740606	-3.28187	3	0.483561	976817	303	3.33333	1.18634	2.45335	9	-0.0113514	0.28737	1.72221	0.085031
927	RAP2A	1.44821	6.66771	16.9373	3.86e-05	0.000703787	1.44831	6.66609	16.9831	3.77138e-05	0.00113861	1.63057	6.80167	195.525	1.98e-44	4.23e-43	1.63044	6.80022	195.491	2.01339e-44	7.41993e-43	NA	NA	NA	NA	NA	NA	NA	NA	-1.367	0	0	1	0.0139695	0.201226	14.4046	2	-0.187256	284204	183	3.66667	0.791095	-4.22467	3	0.0300322	0.693146	-0.313482	0.753915
928	STX6	2.33068	7.02953	38.0127	7.03e-10	5.17e-08	2.33078	7.02791	38.1157	6.66718e-10	8.20453e-08	1.62834	6.82248	197.913	5.96e-45	1.3e-43	1.62821	6.82104	197.878	6.06467e-45	2.29118e-43	NA	NA	NA	NA	NA	NA	NA	NA	0.641833	0.750933	1.16998	5	0.133233	0.23385	1.75519	2	0.367084	504833	255	3.28571	0.746691	2.03412	7	-0.0143874	0.34967	1.09095	0.275297
929	FLVCR1	0.623761	3.43455	1.45519	0.227697	0.433778	0.623849	3.43291	1.44425	0.229453	0.693016	1.62755	4.00161	25.6315	4.13e-07	1.44e-06	1.62741	4.00018	25.6271	4.14179e-07	2.50664e-06	NA	NA	NA	NA	NA	NA	NA	NA	NA	NA	NA	NA	NA	NA	NA	NA	NA	NA	NA	NA	NA	NA	NA	NA	NA	NA	NA
930	CCNYL1	1.74502	5.19093	21.462	3.61e-06	9.38e-05	1.74512	5.1893	21.33	3.86628e-06	0.00016337	1.62745	5.40674	72.6328	1.56e-17	1.21e-16	1.62732	5.4053	72.6202	1.57165e-17	2.1092e-16	NA	NA	NA	NA	NA	NA	NA	NA	NA	NA	NA	NA	NA	NA	NA	NA	NA	NA	NA	NA	NA	NA	NA	NA	NA	NA	NA
931	BTG1	0.964261	7.15502	2.93836	0.0864986	0.234646	0.964389	7.15338	2.93747	0.086546	0.38172	1.62738	6.69381	180.739	3.34e-41	6.52e-40	1.62724	6.69236	180.708	3.39576e-41	1.14698e-39	NA	NA	NA	NA	NA	NA	NA	NA	NA	NA	NA	NA	NA	NA	NA	NA	NA	NA	NA	NA	NA	NA	NA	NA	NA	NA	NA
932	ZFAND6	1.58672	6.63958	18.9887	1.31e-05	0.000283268	1.58683	6.63795	19.0355	1.28306e-05	0.000454536	1.62561	6.82214	197.316	8.05e-45	1.75e-43	1.62547	6.82069	197.282	8.18552e-45	3.07585e-43	NA	NA	NA	NA	NA	NA	NA	NA	NA	NA	NA	NA	NA	NA	NA	NA	NA	NA	NA	NA	NA	NA	NA	NA	NA	NA	NA
933	SESN2	-0.0330999	5.60127	0.00702185	0.933218	0.966743	-0.0329942	5.59962	0.00695303	0.933546	1	1.62158	5.53637	79.2439	5.49e-19	4.67e-18	1.62145	5.53492	79.2301	5.52802e-19	8.14039e-18	NA	NA	NA	NA	NA	NA	NA	NA	NA	NA	NA	NA	NA	NA	NA	NA	NA	NA	NA	NA	NA	NA	NA	NA	NA	NA	NA
934	DHCR24	1.7099	6.26873	7.87524	0.00501164	0.0331898	1.71003	6.2671	7.86665	0.00503549	0.0545655	1.61916	6.90004	206.899	6.52e-47	1.5e-45	1.61902	6.89859	206.863	6.6424e-47	2.64727e-45	NA	NA	NA	NA	NA	NA	NA	NA	NA	NA	NA	NA	NA	NA	NA	NA	NA	NA	NA	NA	NA	NA	NA	NA	NA	NA	NA
935	MRPL49	1.28288	6.58232	11.4242	0.000724934	0.00771165	1.28299	6.58069	11.4469	0.000716137	0.0125685	1.61784	6.43099	148.852	3.09e-34	4.82e-33	1.61771	6.42955	148.826	3.13064e-34	8.44591e-33	-0.434724	0.464343	-1.06813	3	0.390524	0.148876	0.381222	2	0.364781	0	0	1	-0.469954	0	0	1	-0.0525862	3.46863e+06	166	3.5	0.417367	-7.93682	2	0.0969891	1.43026	-0.104579	0.91671
936	FOXG1	NA	NA	NA	NA	NA	1.68394	1.37397	1.00001	0.317309	0.829767	1.61668	1.95958	4.05971	0.043918	0.067156	1.61655	1.95815	4.05904	0.0439354	0.115835	NA	NA	NA	NA	NA	NA	NA	NA	NA	NA	NA	NA	NA	NA	NA	NA	NA	NA	NA	NA	NA	NA	NA	NA	NA	NA	NA
937	MED31	1.64194	4.05008	12.7584	0.000354414	0.00430824	1.64205	4.04844	12.6715	0.000371265	0.00732507	1.6143	4.23624	30.2466	3.8e-08	1.48e-07	1.61417	4.2348	30.2414	3.81483e-08	2.56717e-07	NA	NA	NA	NA	NA	NA	NA	NA	0.82969	0	0	1	NA	NA	NA	NA	0.82969	27566.7	131	3	0	0	1	0.103848	2.05399	0.353382	0.723802
938	HOXB5	1.58441	2.60349	3.55345	0.0594216	0.184185	1.58444	2.60185	3.52649	0.0603956	0.302855	1.61202	2.90043	10.2638	0.00135663	0.00285735	1.61189	2.899	10.2621	0.00135792	0.00494973	NA	NA	NA	NA	NA	NA	NA	NA	NA	NA	NA	NA	NA	NA	NA	NA	NA	NA	NA	NA	NA	NA	NA	NA	NA	NA	NA
939	RAE1	1.76103	5.99062	22.0732	2.62e-06	7.03e-05	1.76113	5.989	22.0953	2.5944e-06	0.000113975	1.61155	6.13741	120.265	5.53e-28	7.07e-27	1.61142	6.13597	120.244	5.59382e-28	1.23516e-26	-0.315954	0	0	1	0.168882	0	0	1	0.459911	0.319056	0.693733	11	0.409714	0.783102	1.91134	6	0.459911	484917	368	3.35294	0.374345	0.81395	17	-0.00836508	0.199959	2.34186	0.0191877
940	RBMXL1	1.51248	5.27775	12.0862	0.000507966	0.00581856	1.51258	5.27611	12.0163	0.000527387	0.00986471	1.61149	4.85432	47.8037	4.71e-12	2.56e-11	1.61136	4.85288	47.7953	4.73123e-12	4.44263e-11	NA	NA	NA	NA	NA	NA	NA	NA	0.743989	0.539478	0.725116	3	0.667073	0.166861	0.250139	2	0.743989	923564	390	3.4	0.323732	0.43513	5	0.00790008	0.458931	1.60392	0.108732
941	RPF1	1.89332	5.7445	25.3859	4.69e-07	1.55e-05	1.89342	5.74288	25.3331	4.82351e-07	2.60929e-05	1.61021	5.82979	96.5462	8.72e-23	9.1e-22	1.61008	5.82834	96.5292	8.79363e-23	1.58836e-21	NA	NA	NA	NA	NA	NA	NA	NA	2.48016	0	0	1	0.354018	0	0	1	1.41709	464662	349	3.5	1.06307	0.750179	2	0.0384152	1.44981	0.950932	0.341639
942	ZNF304	1.31095	5.31964	13.0532	0.000302762	0.00380256	1.31105	5.31801	12.9731	0.000315993	0.00643702	1.60851	4.88398	48.7034	2.98e-12	1.64e-11	1.60838	4.88254	48.6948	2.99056e-12	2.85917e-11	NA	NA	NA	NA	NA	NA	NA	NA	NA	NA	NA	NA	NA	NA	NA	NA	NA	NA	NA	NA	NA	NA	NA	NA	NA	NA	NA
943	ELL2	0.52667	9.44662	1.08533	0.297508	0.509555	0.526749	9.445	1.08604	0.297351	0.802247	1.60745	9.58365	989.759	3.02e-217	4.53e-215	1.60732	9.5822	993.989	3.63726e-218	9.44925e-216	NA	NA	NA	NA	NA	NA	NA	NA	NA	NA	NA	NA	NA	NA	NA	NA	NA	NA	NA	NA	NA	NA	NA	NA	NA	NA	NA
944	TIMM23B	1.85733	4.87941	21.7575	3.09e-06	8.14e-05	1.85743	4.87778	21.675	3.22981e-06	0.000138704	1.60503	5.01641	53.4639	2.63e-13	1.56e-12	1.6049	5.01497	53.4546	2.64644e-13	2.72052e-12	NA	NA	NA	NA	NA	NA	NA	NA	-0.223399	0	0	1	NA	NA	NA	NA	-0.223399	449605	257	3	0	0	1	0.0744867	2.10371	-0.1416	0.887396
945	ATP2A1	1.25292	3.1971	2.61618	0.105779	0.26713	1.25302	3.19546	2.60116	0.106785	0.435735	1.60397	1.7989	3.30227	0.0691842	0.101028	1.60385	1.79748	3.30173	0.069207	0.173827	NA	NA	NA	NA	NA	NA	NA	NA	NA	NA	NA	NA	NA	NA	NA	NA	NA	NA	NA	NA	NA	NA	NA	NA	NA	NA	NA
946	PHLDA2	1.46462	3.12884	3.69571	0.0545527	0.174225	1.46473	3.1272	3.67444	0.0552529	0.286729	1.60135	3.64174	18.8145	1.44e-05	4.15e-05	1.60121	3.6403	18.8112	1.44317e-05	7.19464e-05	NA	NA	NA	NA	NA	NA	NA	NA	NA	NA	NA	NA	NA	NA	NA	NA	NA	NA	NA	NA	NA	NA	NA	NA	NA	NA	NA
947	PLEKHA3	1.53327	5.70982	17.655	2.65e-05	0.000516825	1.53336	5.70819	17.6122	2.7085e-05	0.000862252	1.59906	5.78337	92.305	7.43e-22	7.44e-21	1.59893	5.78193	92.2887	7.4909e-22	1.29951e-20	NA	NA	NA	NA	NA	NA	NA	NA	NA	NA	NA	NA	NA	NA	NA	NA	NA	NA	NA	NA	NA	NA	NA	NA	NA	NA	NA
948	ZBTB24	1.00434	4.90395	4.97864	0.0256622	0.105681	1.00444	4.90231	4.96268	0.0259	0.173627	1.59852	4.6621	40.917	1.59e-10	7.73e-10	1.59839	4.66066	40.9098	1.59422e-10	1.34296e-09	NA	NA	NA	NA	NA	NA	NA	NA	NA	NA	NA	NA	NA	NA	NA	NA	NA	NA	NA	NA	NA	NA	NA	NA	NA	NA	NA
949	CCNL1	1.3546	7.08453	10.5937	0.00113474	0.0108828	1.35469	7.08291	10.6075	0.00112629	0.0177133	1.59827	7.07822	228.99	9.9e-52	2.5e-50	1.59813	7.07677	228.95	1.01016e-51	4.401e-50	NA	NA	NA	NA	NA	NA	NA	NA	NA	NA	NA	NA	NA	NA	NA	NA	NA	NA	NA	NA	NA	NA	NA	NA	NA	NA	NA
950	EPAS1	-0.153997	6.84328	0.148662	0.699818	0.831518	-0.153884	6.84162	0.148635	0.699843	1	1.59805	5.73781	89.2572	3.47e-21	3.33e-20	1.59792	5.73636	89.2414	3.49459e-21	5.80858e-20	NA	NA	NA	NA	NA	NA	NA	NA	NA	NA	NA	NA	NA	NA	NA	NA	NA	NA	NA	NA	NA	NA	NA	NA	NA	NA	NA
951	FSIP2	1.24271	3.82817	6.74144	0.00941985	0.051465	1.24283	3.82653	6.68541	0.00972049	0.0861576	1.59246	3.58636	17.8279	2.42e-05	6.77e-05	1.59233	3.58492	17.8248	2.42207e-05	0.000117329	NA	NA	NA	NA	NA	NA	NA	NA	NA	NA	NA	NA	NA	NA	NA	NA	NA	NA	NA	NA	NA	NA	NA	NA	NA	NA	NA
952	RSL1D1	1.58352	7.95744	6.79276	0.00915281	0.0504467	1.58365	7.95581	6.79017	0.00916613	0.0826695	1.59042	8.07861	451.239	3.88e-100	2.03e-98	1.59029	8.07716	451.159	4.03561e-100	3.64469e-98	0.18069	0.689099	3.81372	7	0.285182	0.707518	2.48093	6	0.464785	0.808359	1.73921	34	0.0327817	0.632921	19.3071	43	0.184577	1.19708e+06	490	3.55844	0.92487	5.01074	77	-0.00131399	0.0929931	1.99898	0.0456105
953	ACTR5	1.80116	3.86166	13.4301	0.000247616	0.00326625	1.80126	3.86003	13.3274	0.000261556	0.00556515	1.59031	3.66576	18.948	1.34e-05	3.89e-05	1.59018	3.66433	18.9447	1.34563e-05	6.74675e-05	NA	NA	NA	NA	NA	NA	NA	NA	NA	NA	NA	NA	NA	NA	NA	NA	NA	NA	NA	NA	NA	NA	NA	NA	NA	NA	NA
954	SDCBP	1.43136	8.28516	13.7169	0.000212538	0.0028956	1.43147	8.28353	13.7618	0.000207516	0.00464467	1.58952	8.72176	662.899	3.5e-146	3.35e-144	1.58939	8.72031	663.996	2.01984e-146	3.34673e-144	NA	NA	NA	NA	-6.92757	0	0	1	0.848148	0.22919	0.270224	3	3.9701	0.724302	0.182439	4	1.58088	658894	318	3.57143	2.92124	1.84786	7	-0.00444953	0.362461	4.3738	1.221e-05
955	PLEKHM1	1.31156	6.45833	14.6162	0.000131778	0.00196676	1.31165	6.4567	14.659	0.00012882	0.0031742	1.58926	6.16468	119.709	7.32e-28	9.25e-27	1.58913	6.16324	119.688	7.40263e-28	1.61759e-26	NA	NA	NA	NA	NA	NA	NA	NA	NA	NA	NA	NA	NA	NA	NA	NA	NA	NA	NA	NA	NA	NA	NA	NA	NA	NA	NA
956	CD2AP	1.58286	6.17654	19.2274	1.16e-05	0.000255101	1.58295	6.17492	19.2684	1.1357e-05	0.00040922	1.58694	6.26865	128.454	8.93e-30	1.22e-28	1.58681	6.2672	128.431	9.03208e-30	2.13793e-28	-0.215603	0	0	1	NA	NA	NA	NA	0.202108	0.762646	3.77345	16	-0.117651	0.49413	-4.19996	11	0.17019	382997	639	3.40741	0.67967	3.99361	27	0.00270388	0.154211	1.08608	0.277443
957	LRP6	1.43167	6.4822	15.1969	9.69e-05	0.00154367	1.43178	6.48057	15.2292	9.52206e-05	0.0024891	1.58637	6.35174	136.125	1.87e-31	2.68e-30	1.58624	6.35029	136.1	1.89702e-31	4.70189e-30	NA	NA	NA	NA	NA	NA	NA	NA	NA	NA	NA	NA	NA	NA	NA	NA	NA	NA	NA	NA	NA	NA	NA	NA	NA	NA	NA
958	ZNF121	1.1656	3.24887	3.8054	0.0510874	0.166803	1.16565	3.24723	3.77695	0.0519632	0.274988	1.58437	3.18239	12.6945	0.00036673	0.000855421	1.58424	3.18096	12.6923	0.000367166	0.00148212	NA	NA	NA	NA	NA	NA	NA	NA	NA	NA	NA	NA	NA	NA	NA	NA	NA	NA	NA	NA	NA	NA	NA	NA	NA	NA	NA
959	PFKFB3	0.993532	7.25785	2.35978	0.1245	0.296682	0.993594	7.25623	2.35698	0.124723	0.479721	1.58255	7.87842	379.797	1.38e-84	6e-83	1.58242	7.87696	378.87	2.19295e-84	1.65398e-82	NA	NA	NA	NA	NA	NA	NA	NA	NA	NA	NA	NA	NA	NA	NA	NA	NA	NA	NA	NA	NA	NA	NA	NA	NA	NA	NA
960	PRKAA2	0.106679	2.24984	0.0143253	0.90473	0.950844	0.106847	2.2482	0.0142293	0.905048	1	1.582	1.99685	4.08174	0.0433489	0.0663776	1.58188	1.99542	4.08106	0.0433666	0.11455	NA	NA	NA	NA	NA	NA	NA	NA	NA	NA	NA	NA	NA	NA	NA	NA	NA	NA	NA	NA	NA	NA	NA	NA	NA	NA	NA
961	KLHL28	1.71954	5.34472	20.0456	7.56e-06	0.000175546	1.71963	5.34309	19.9309	8.02926e-06	0.000303884	1.57841	5.20847	59.7295	1.09e-14	7.1e-14	1.57828	5.20703	59.7189	1.09423e-14	1.23663e-13	NA	NA	NA	NA	NA	NA	NA	NA	NA	NA	NA	NA	NA	NA	NA	NA	NA	NA	NA	NA	NA	NA	NA	NA	NA	NA	NA
962	GATA2	0.255645	2.54658	0.0832665	0.772919	0.874275	0.25575	2.54494	0.0823691	0.774112	1	1.57762	2.26399	5.42074	0.0198989	0.032993	1.57749	2.26257	5.41981	0.0199096	0.0570864	NA	NA	NA	NA	NA	NA	NA	NA	NA	NA	NA	NA	NA	NA	NA	NA	NA	NA	NA	NA	NA	NA	NA	NA	NA	NA	NA
963	COX10	1.64809	4.66296	16.9856	3.77e-05	0.000692975	1.64818	4.66133	16.9396	3.85871e-05	0.00116007	1.57658	4.58506	37.7377	8.09e-10	3.69e-09	1.57645	4.58362	37.731	8.12033e-10	6.40465e-09	NA	NA	NA	NA	NA	NA	NA	NA	NA	NA	NA	NA	NA	NA	NA	NA	NA	NA	NA	NA	NA	NA	NA	NA	NA	NA	NA
964	NRXN3	1.62263	2.57268	2.1062	0.146703	0.329793	1.6227	2.57104	2.08661	0.148595	0.535091	1.57617	2.40276	6.22353	0.0126064	0.0218932	1.57604	2.40134	6.22245	0.012614	0.0378979	NA	NA	NA	NA	NA	NA	NA	NA	NA	NA	NA	NA	NA	NA	NA	NA	NA	NA	NA	NA	NA	NA	NA	NA	NA	NA	NA
965	ARHGEF26	3.02308	3.98792	28.7782	8.12e-08	3.48e-06	3.02318	3.98629	28.5839	8.97253e-08	6.25195e-06	1.57437	3.83258	21.2367	4.06e-06	1.26e-05	1.57424	3.83114	21.233	4.06707e-06	2.19164e-05	NA	NA	NA	NA	NA	NA	NA	NA	NA	NA	NA	NA	NA	NA	NA	NA	NA	NA	NA	NA	NA	NA	NA	NA	NA	NA	NA
966	OXR1	1.57911	6.33644	21.2369	4.06e-06	0.000103296	1.57921	6.33482	21.2993	3.92877e-06	0.000165678	1.57426	6.48478	147.495	6.12e-34	9.46e-33	1.57413	6.48334	147.468	6.19894e-34	1.6596e-32	NA	NA	NA	NA	NA	NA	NA	NA	-0.489385	0.559106	-1.14247	2	3.48757	1.64858	0.472703	4	1.69385	195352	874	3.66667	3.59268	2.12101	6	0.0130647	0.384632	4.36986	1.24324e-05
967	ZFP28	1.19225	4.49982	7.13415	0.00756294	0.0444345	1.19235	4.49818	7.11954	0.00762485	0.0735123	1.57399	4.73805	42.1469	8.47e-11	4.18e-10	1.57386	4.73661	42.1394	8.49949e-11	7.26757e-10	NA	NA	NA	NA	NA	NA	NA	NA	NA	NA	NA	NA	NA	NA	NA	NA	NA	NA	NA	NA	NA	NA	NA	NA	NA	NA	NA
968	TMED7-TICAM2	0.692066	2.55595	0.715446	0.397642	0.603568	0.692332	2.55431	0.708502	0.399942	0.935451	1.57351	2.44057	6.44128	0.0111498	0.0196074	1.57338	2.43914	6.44016	0.0111568	0.0339562	NA	NA	NA	NA	NA	NA	NA	NA	NA	NA	NA	NA	NA	NA	NA	NA	NA	NA	NA	NA	NA	NA	NA	NA	NA	NA	NA
969	ASPHD2	1.34033	2.86366	4.07894	0.0434208	0.149474	1.34042	2.86202	4.0512	0.0441398	0.246965	1.57272	2.77836	8.82695	0.00296814	0.0058416	1.57259	2.77694	8.8254	0.00297065	0.0101184	NA	NA	NA	NA	NA	NA	NA	NA	NA	NA	NA	NA	NA	NA	NA	NA	NA	NA	NA	NA	NA	NA	NA	NA	NA	NA	NA
970	C12orf29	1.18873	5.17276	7.89937	0.00494521	0.032882	1.18882	5.17113	7.86154	0.00504975	0.0546614	1.57119	5.61293	79.2911	5.36e-19	4.57e-18	1.57106	5.61148	79.2769	5.39881e-19	7.96127e-18	NA	NA	NA	NA	NA	NA	NA	NA	0.771184	0.791684	1.02658	2	NA	NA	NA	NA	0.771184	214463	325	3	0.791684	1.02658	2	0.0938278	1.32236	0.512234	0.608487
971	SLC25A38	1.45774	5.75877	14.0357	0.000179375	0.00252125	1.45784	5.75714	14.0074	0.000182092	0.00419231	1.57105	5.6769	82.997	8.22e-20	7.34e-19	1.57092	5.67545	82.9822	8.2797e-20	1.2811e-18	NA	NA	NA	NA	NA	NA	NA	NA	NA	NA	NA	NA	NA	NA	NA	NA	NA	NA	NA	NA	NA	NA	NA	NA	NA	NA	NA
972	MMADHC	1.41147	7.12678	16.2577	5.53e-05	0.000946756	1.41157	7.12515	16.3132	5.36885e-05	0.00151745	1.56827	7.64427	327.462	3.43e-73	1.26e-71	1.56813	7.64282	327.403	3.53447e-73	2.23351e-71	NA	NA	NA	NA	NA	NA	NA	NA	0.437212	0	0	1	NA	NA	NA	NA	0.437212	248818	330	3	0	0	1	0.0766376	2.00949	0.179436	0.857596
973	ZBTB43	0.814772	5.86875	4.79204	0.0285915	0.113274	0.814876	5.86711	4.79007	0.0286242	0.185278	1.56346	5.34603	64.9031	7.87e-16	5.49e-15	1.56333	5.34459	64.8914	7.91427e-16	9.56027e-15	NA	NA	NA	NA	NA	NA	NA	NA	NA	NA	NA	NA	NA	NA	NA	NA	NA	NA	NA	NA	NA	NA	NA	NA	NA	NA	NA
974	THOC5	1.91904	6.16635	17.837	2.41e-05	0.000473991	1.91915	6.16472	17.8452	2.3962e-05	0.000773363	1.55854	5.80517	89.6968	2.78e-21	2.69e-20	1.55841	5.80372	89.6806	2.79879e-21	4.68536e-20	NA	NA	NA	NA	0.626833	0	0	1	1.0163	0	0	1	NA	NA	NA	NA	1.0163	101244	683	3	0	0	1	0.197349	2.16348	0.378534	0.705034
975	AEBP1	-0.499815	4.59186	0.101625	0.749888	0.859944	-0.499662	4.59018	0.101275	0.750305	1	1.55795	2.31029	5.56181	0.0183564	0.0307204	1.55782	2.30887	5.56084	0.0183666	0.0531693	NA	NA	NA	NA	NA	NA	NA	NA	8.81475	0	0	1	NA	NA	NA	NA	8.81475	1.78371e+06	1158	3	0	0	1	-0.00259989	2.15406	4.09337	4.25148e-05
976	CS	1.91074	8.122	16.3061	5.39e-05	0.000927418	1.91086	8.12037	16.329	5.32435e-05	0.00151202	1.55655	8.45577	535.502	1.79e-118	1.17e-116	1.55642	8.45432	535.569	1.73547e-118	1.96342e-116	0.119366	0.458523	3.84132	6	0.437289	0.40864	0.934485	8	0.326782	0.735997	2.25226	53	-0.163295	0.927259	-5.67841	26	0.253748	1.15892e+06	466	3.32911	0.895046	3.5273	79	0.00602959	0.0898201	2.75794	0.00581663
977	DCAF13	1.92119	6.31256	21.4003	3.73e-06	9.66e-05	1.92131	6.31093	21.4291	3.6715e-06	0.000156713	1.55342	6.59399	155.604	1.03e-35	1.7e-34	1.55329	6.59255	155.576	1.04805e-35	2.98994e-34	NA	NA	NA	NA	NA	NA	NA	NA	1.68978	0	0	1	1.8073	0.903457	0.499893	2	1.68978	467631	445	3.66667	0.903457	0.534661	3	0.0145119	0.720009	2.32673	0.0199798
978	C10orf2	1.75792	5.00309	9.99685	0.00156809	0.0139662	1.75802	5.00146	9.95841	0.00160116	0.023301	1.55101	4.90671	46.5162	9.09e-12	4.84e-11	1.55087	4.90527	46.5077	9.12573e-12	8.41511e-11	NA	NA	NA	NA	NA	NA	NA	NA	NA	NA	NA	NA	NA	NA	NA	NA	NA	NA	NA	NA	NA	NA	NA	NA	NA	NA	NA
979	ODF2L	2.1462	5.78829	16.1192	5.95e-05	0.00100782	2.14629	5.78667	16.0697	6.10516e-05	0.00168597	1.5507	5.01951	50.4982	1.19e-12	6.82e-12	1.55057	5.01807	50.4891	1.1983e-12	1.18496e-11	NA	NA	NA	NA	NA	NA	NA	NA	NA	NA	NA	NA	NA	NA	NA	NA	NA	NA	NA	NA	NA	NA	NA	NA	NA	NA	NA
980	TNRC6A	1.31735	7.50968	12.9429	0.000321144	0.00398386	1.31746	7.50805	12.9861	0.00031381	0.00640495	1.55012	7.23998	242.952	8.93e-55	2.43e-53	1.54999	7.23853	242.908	9.13283e-55	4.30902e-53	NA	NA	NA	NA	NA	NA	NA	NA	-2.2776	0	0	1	NA	NA	NA	NA	-2.2776	64780.5	1962	3	0	0	1	0.0804284	1.72912	-1.36371	0.172658
981	RAVER2	1.2105	2.29223	0.723211	0.395093	0.601407	1.21058	2.29059	0.71392	0.398146	0.933814	1.54721	1.51061	2.09205	0.148067	0.197363	1.54709	1.50919	2.09172	0.1481	0.336224	NA	NA	NA	NA	NA	NA	NA	NA	NA	NA	NA	NA	NA	NA	NA	NA	NA	NA	NA	NA	NA	NA	NA	NA	NA	NA	NA
982	LTV1	1.9299	5.53881	24.0508	9.38e-07	2.89e-05	1.93	5.53718	23.9481	9.89679e-07	4.94675e-05	1.54597	5.69397	81.7054	1.58e-19	1.39e-18	1.54584	5.69253	81.6905	1.59153e-19	2.42159e-18	NA	NA	NA	NA	NA	NA	NA	NA	-0.160137	0.191166	-1.19377	2	-0.953038	0.0891456	-0.0935384	4	-0.93224	415922	475	3.66667	0.465229	-0.499044	6	-0.00448934	0.406599	-2.28173	0.0225052
983	GPATCH3	1.26553	4.68069	10.1802	0.00141958	0.012911	1.26563	4.67905	10.1537	0.00144011	0.0214165	1.5452	4.20902	27.481	1.59e-07	5.75e-07	1.54506	4.20758	27.476	1.59056e-07	9.97919e-07	NA	NA	NA	NA	NA	NA	NA	NA	NA	NA	NA	NA	NA	NA	NA	NA	NA	NA	NA	NA	NA	NA	NA	NA	NA	NA	NA
984	ZNF736	1.28634	3.10685	2.93876	0.0864768	0.234646	1.28645	3.10521	2.92153	0.087405	0.38406	1.54227	2.6437	7.54588	0.00601475	0.0111942	1.54214	2.64227	7.54454	0.00601923	0.0193911	NA	NA	NA	NA	NA	NA	NA	NA	NA	NA	NA	NA	NA	NA	NA	NA	NA	NA	NA	NA	NA	NA	NA	NA	NA	NA	NA
985	PRAMEF8	3.74322	1.46347	4.00879	0.0452637	0.153618	3.74335	1.46183	3.98784	0.0458298	0.25318	1.54195	1.55353	2.21629	0.136561	0.183879	1.54183	1.55211	2.21593	0.136593	0.314231	NA	NA	NA	NA	NA	NA	NA	NA	NA	NA	NA	NA	NA	NA	NA	NA	NA	NA	NA	NA	NA	NA	NA	NA	NA	NA	NA
986	RPS6KA6	2.08979	3.73429	15.7119	7.38e-05	0.00122245	2.08989	3.73265	15.5769	7.92172e-05	0.00212623	1.54138	3.67782	18.1288	2.06e-05	5.82e-05	1.54124	3.67638	18.1255	2.0681e-05	0.000100902	NA	NA	NA	NA	NA	NA	NA	NA	NA	NA	NA	NA	NA	NA	NA	NA	NA	NA	NA	NA	NA	NA	NA	NA	NA	NA	NA
987	HIST1H2BC	-0.00259096	2.64699	1.35e-05	0.99707	0.998701	-0.00245262	2.64535	1.20151e-05	0.997234	1	1.54057	2.40989	6.0251	0.0141038	0.0242306	1.54044	2.40847	6.02404	0.0141123	0.0419443	NA	NA	NA	NA	NA	NA	NA	NA	NA	NA	NA	NA	NA	NA	NA	NA	NA	NA	NA	NA	NA	NA	NA	NA	NA	NA	NA
988	PLS1	3.77783	3.34457	21.0066	4.58e-06	0.000114745	3.77795	3.34294	20.9016	4.83481e-06	0.000196934	1.5404	2.55583	6.93506	0.00845222	0.0152428	1.54027	2.5544	6.93383	0.00845804	0.0263991	NA	NA	NA	NA	NA	NA	NA	NA	NA	NA	NA	NA	NA	NA	NA	NA	NA	NA	NA	NA	NA	NA	NA	NA	NA	NA	NA
989	ARIH1	1.65701	7.45188	18.2957	1.89e-05	0.000384884	1.65712	7.45025	18.3468	1.84129e-05	0.000615999	1.53799	7.35869	260.122	1.61e-58	4.74e-57	1.53786	7.35724	260.075	1.653e-58	8.40196e-57	NA	NA	NA	NA	NA	NA	NA	NA	0.67901	1.62527	2.39359	7	2.15772	0.208663	0.0967053	2	1.01113	369943	557	3.22222	1.57132	1.55403	9	0.00134836	0.302057	3.343	0.000828778
990	BASP1	0.927264	6.42857	4.4624	0.0346488	0.128606	0.927346	6.42694	4.46433	0.0346097	0.210125	1.53596	6.31776	125.691	3.59e-29	4.82e-28	1.53583	6.31631	125.668	3.63507e-29	8.44292e-28	-1.00658	0.272964	-0.27118	15	-0.353621	0	0	1	-0.555035	1.53917	-2.7731	12	1.39171	2.04653	1.47051	10	-0.0925222	302987	227	3.45455	1.75618	-18.9812	22	0.000757675	0.174975	-0.533103	0.593962
991	DDX39A	2.17876	6.39776	31.6607	1.84e-08	9.3e-07	2.17887	6.39614	31.7294	1.77221e-08	1.4917e-06	1.53534	6.29991	124.062	8.17e-29	1.08e-27	1.53521	6.29847	124.039	8.26094e-29	1.89569e-27	NA	NA	NA	NA	NA	NA	NA	NA	NA	NA	NA	NA	0.351362	5.04623	14.3619	4	0.351362	237469	427	4	5.04623	14.3619	4	-0.00151916	0.669117	0.527384	0.597927
992	FAM13A	0.785088	6.20346	4.46524	0.0345913	0.12849	0.785199	6.20182	4.47378	0.0344188	0.209268	1.53506	6.3893	132.052	1.46e-30	2.03e-29	1.53493	6.38785	132.028	1.47554e-30	3.55261e-29	NA	NA	NA	NA	NA	NA	NA	NA	NA	NA	NA	NA	NA	NA	NA	NA	NA	NA	NA	NA	NA	NA	NA	NA	NA	NA	NA
993	PITHD1	1.65045	5.58007	18.2417	1.95e-05	0.000392848	1.65055	5.57844	18.179	2.01083e-05	0.000661949	1.535	6.07212	105.592	9.06e-25	1.01e-23	1.53486	6.07068	105.573	9.14676e-25	1.76259e-23	NA	NA	NA	NA	NA	NA	NA	NA	NA	NA	NA	NA	NA	NA	NA	NA	NA	NA	NA	NA	NA	NA	NA	NA	NA	NA	NA
994	ZNF410	1.27039	6.15898	12.9374	0.000322084	0.00398684	1.2705	6.15735	12.9681	0.000316837	0.00644798	1.53422	6.4988	142.467	7.69e-33	1.15e-31	1.53409	6.49736	142.441	7.78946e-33	2.01399e-31	NA	NA	NA	NA	NA	NA	NA	NA	NA	NA	NA	NA	NA	NA	NA	NA	NA	NA	NA	NA	NA	NA	NA	NA	NA	NA	NA
995	MICB	0.858171	3.7253	3.25275	0.0713036	0.207287	0.858273	3.72366	3.22513	0.0725162	0.341378	1.53415	4.5386	34.7803	3.69e-09	1.59e-08	1.53402	4.53716	34.774	3.70292e-09	2.76804e-08	NA	NA	NA	NA	NA	NA	NA	NA	NA	NA	NA	NA	NA	NA	NA	NA	NA	NA	NA	NA	NA	NA	NA	NA	NA	NA	NA
996	SUPT6H	1.72223	8.5824	19.0828	1.25e-05	0.000271002	1.72233	8.58078	19.1443	1.21201e-05	0.000432277	1.53309	8.00874	403.814	8.14e-90	3.72e-88	1.53296	8.00729	403.74	8.44876e-90	6.70895e-88	1.46553	1.53983	1.0507	4	1.9406	0.670489	0.345505	4	1.33315	1.53416	1.15078	13	2.30044	3.10586	1.35012	31	1.82696	546177	1726	3.70455	2.96298	1.62181	44	-0.00281277	0.127675	14.3315	1.39064e-46
997	BTAF1	1.64133	7.20397	15.2592	9.37e-05	0.00150469	1.64141	7.20235	15.2812	9.26336e-05	0.00244272	1.53309	7.02133	204.831	1.84e-46	4.2e-45	1.53296	7.01988	204.794	1.87846e-46	7.40628e-45	NA	NA	NA	NA	NA	NA	NA	NA	NA	NA	NA	NA	NA	NA	NA	NA	NA	NA	NA	NA	NA	NA	NA	NA	NA	NA	NA
998	KIN	1.78032	5.09355	22.0793	2.62e-06	7.02e-05	1.78042	5.09192	21.9584	2.78618e-06	0.000121638	1.53308	4.91431	45.8496	1.28e-11	6.74e-11	1.53295	4.91287	45.8412	1.2824e-11	1.17227e-10	NA	NA	NA	NA	NA	NA	NA	NA	0.661447	0.25199	0.380968	2	2.04941	0	0	1	0.913437	621182	393	3.33333	0.819978	0.897684	3	0.0506223	0.757414	1.13916	0.254637
999	FUBP1	2.30474	7.63454	30.6596	3.07e-08	1.43e-06	2.30482	7.63293	30.7263	2.97106e-08	2.29011e-06	1.53139	7.8227	355.036	3.39e-79	1.38e-77	1.53126	7.82125	354.97	3.50574e-79	2.47554e-77	-0.29021	0.75779	-2.61117	22	0.0906077	0.534708	5.90135	19	0.313948	0.915982	2.91762	41	-0.129098	0.862321	-6.67959	51	0.0491187	1.07643e+06	644	3.55435	1.02478	20.8633	92	0.000270267	0.0843511	0.579108	0.562516
1000	SLC13A4	2.00806	3.04972	3.17179	0.0749202	0.214053	2.00817	3.04808	3.15663	0.0756192	0.350391	1.53124	2.65823	7.55407	0.00598745	0.0111571	1.53111	2.65681	7.55272	0.00599195	0.019318	NA	NA	NA	NA	NA	NA	NA	NA	NA	NA	NA	NA	NA	NA	NA	NA	NA	NA	NA	NA	NA	NA	NA	NA	NA	NA	NA
1001	GDAP2	1.34309	4.84354	12.5174	0.000403189	0.00479244	1.34318	4.8419	12.4759	0.000412242	0.0080054	1.52962	4.80137	42.03	8.99e-11	4.43e-10	1.52948	4.79993	42.0223	9.0239e-11	7.70657e-10	NA	NA	NA	NA	NA	NA	NA	NA	-0.406297	0	0	1	NA	NA	NA	NA	-0.406297	111994	497	3	0	0	1	0.13789	2.16048	-0.251883	0.801132
1002	ZNF431	1.67021	3.96743	12.5783	0.00039026	0.00465165	1.67031	3.9658	12.4893	0.000409296	0.00796008	1.52932	3.85161	20.501	5.96e-06	1.81e-05	1.52918	3.85017	20.4972	5.97181e-06	3.14634e-05	NA	NA	NA	NA	NA	NA	NA	NA	NA	NA	NA	NA	NA	NA	NA	NA	NA	NA	NA	NA	NA	NA	NA	NA	NA	NA	NA
1003	KIAA0895	-0.134617	1.93756	0.0182328	0.892589	0.943895	-0.134537	1.93592	0.0181349	0.892876	1	1.528	1.89459	3.41262	0.0646997	0.0951168	1.52788	1.89316	3.41203	0.0647229	0.163757	NA	NA	NA	NA	NA	NA	NA	NA	NA	NA	NA	NA	NA	NA	NA	NA	NA	NA	NA	NA	NA	NA	NA	NA	NA	NA	NA
1004	CIR1	1.04724	5.62766	9.09611	0.00256154	0.0201492	1.04734	5.62603	9.06721	0.00260234	0.0333705	1.5258	5.58063	73.6436	9.36e-18	7.39e-17	1.52566	5.57919	73.63	9.42205e-18	1.28746e-16	NA	NA	NA	NA	NA	NA	NA	NA	NA	NA	NA	NA	NA	NA	NA	NA	NA	NA	NA	NA	NA	NA	NA	NA	NA	NA	NA
1005	PPP2R5A	1.67676	2.46975	2.94971	0.085893	0.233743	1.43897	5.3955	11.6953	0.000626573	0.0112788	1.52574	3.12681	11.3495	0.000754691	0.00166696	1.89812	5.34154	89.6118	2.89792e-21	4.84745e-20	NA	NA	NA	NA	NA	NA	NA	NA	NA	NA	NA	NA	NA	NA	NA	NA	NA	NA	NA	NA	NA	NA	NA	NA	NA	NA	NA
1006	PPP2R5A	1.67676	2.46975	2.94971	0.085893	0.233743	1.67682	2.46811	2.91028	0.0880168	0.385701	1.52574	3.12681	11.3495	0.000754691	0.00166696	1.52561	3.12537	11.3474	0.000755528	0.00288855	NA	NA	NA	NA	NA	NA	NA	NA	NA	NA	NA	NA	NA	NA	NA	NA	NA	NA	NA	NA	NA	NA	NA	NA	NA	NA	NA
1007	YTHDF2	1.46869	7.20663	14.7035	0.00012581	0.00189688	1.4688	7.205	14.7417	0.000123291	0.00305944	1.52502	7.29022	244.498	4.11e-55	1.13e-53	1.52489	7.28878	244.453	4.20534e-55	1.99309e-53	NA	NA	NA	NA	-1.38088	0	0	1	-2.19581	2.17077	-0.988599	6	-1.6318	0.171021	-0.104805	8	-1.6318	604504	579	3.57143	1.41668	-0.868167	14	0.00221452	0.223896	-7.29812	2.91816e-13
1008	SYNE2	2.06035	5.99589	3.28268	0.0700146	0.204603	2.0605	5.99426	3.27417	0.0703786	0.334155	1.52411	5.87028	90.377	1.97e-21	1.93e-20	1.52398	5.86883	90.3603	1.98506e-21	3.36055e-20	0.880818	0.478333	0.543055	2	NA	NA	NA	NA	-1.22295	2.16192	-1.76779	4	4.95326	2.4888	0.502458	7	3.80066	416159	6907	3.63636	6.08285	1.60047	11	-0.011361	0.261639	14.5698	4.37405e-48
1009	RP11-1035H13.3	1.67209	3.51873	9.01089	0.00268376	0.0208681	1.67215	3.51709	8.92787	0.00280851	0.0355807	1.52331	3.00903	10.2375	0.00137612	0.0028934	1.52318	3.0076	10.2357	0.0013775	0.00501328	NA	NA	NA	NA	NA	NA	NA	NA	NA	NA	NA	NA	NA	NA	NA	NA	NA	NA	NA	NA	NA	NA	NA	NA	NA	NA	NA
1010	TSC1	1.25837	6.51884	13.3739	0.000255157	0.00333154	1.25847	6.51722	13.4101	0.00025027	0.0053904	1.52257	6.20747	114.556	9.85e-27	1.19e-25	1.52244	6.20603	114.535	9.95062e-27	2.08142e-25	NA	NA	NA	NA	NA	NA	NA	NA	NA	NA	NA	NA	NA	NA	NA	NA	NA	NA	NA	NA	NA	NA	NA	NA	NA	NA	NA
1011	HIST2H2AA3	-0.451123	2.5993	0.310625	0.577297	0.74762	-0.450945	2.59766	0.307256	0.579369	1	1.52158	2.68724	7.67417	0.00560169	0.0105025	1.52146	2.68581	7.67279	0.00560598	0.0181935	NA	NA	NA	NA	-0.437711	1.42748	-3.26125	17	NA	NA	NA	NA	NA	NA	NA	NA	NA	NA	NA	NA	NA	NA	NA	NA	NA	NA	NA
1012	PPP2R5E	1.45434	6.77856	11.8774	0.000568191	0.00635436	1.45445	6.77693	11.8919	0.000563776	0.0103793	1.51991	6.90479	186.103	2.25e-42	4.53e-41	1.51978	6.90334	186.068	2.29375e-42	7.97807e-41	1.73007	0	0	1	0.255406	0.508014	1.98904	2	0.642305	1.16732	1.8174	18	-0.233049	2.89613	-12.4271	8	0.335892	378735	467	3.30769	1.6301	4.85305	26	0.00377484	0.157118	2.11381	0.0345316
1013	ALKBH1	1.45158	4.23103	10.3374	0.00130359	0.012105	1.45168	4.2294	10.2928	0.00133553	0.0202183	1.51862	4.33684	29.3757	5.96e-08	2.27e-07	1.51849	4.3354	29.3702	5.97885e-08	3.94275e-07	NA	NA	NA	NA	NA	NA	NA	NA	NA	NA	NA	NA	NA	NA	NA	NA	NA	NA	NA	NA	NA	NA	NA	NA	NA	NA	NA
1014	DEDD2	0.239177	4.50465	0.229047	0.632232	0.787061	0.239269	4.50302	0.228555	0.632597	1	1.51838	4.94367	46.064	1.14e-11	6.06e-11	1.51825	4.94223	46.0555	1.1495e-11	1.05399e-10	NA	NA	NA	NA	NA	NA	NA	NA	NA	NA	NA	NA	NA	NA	NA	NA	NA	NA	NA	NA	NA	NA	NA	NA	NA	NA	NA
1015	RANBP17	1.01887	2.38554	0.271837	0.602102	0.765863	1.01898	2.38389	0.26832	0.604461	1	1.51789	2.90657	9.30401	0.00228653	0.00461597	1.51776	2.90514	9.30232	0.00228864	0.0079973	NA	NA	NA	NA	NA	NA	NA	NA	NA	NA	NA	NA	NA	NA	NA	NA	NA	NA	NA	NA	NA	NA	NA	NA	NA	NA	NA
1016	GATA6	2.28707	1.72136	2.74124	0.0977891	0.254083	2.28702	1.71972	2.71752	0.0992524	0.41591	1.51711	2.85835	8.90769	0.00283973	0.00561159	1.51698	2.85693	8.90607	0.00284224	0.00972035	NA	NA	NA	NA	NA	NA	NA	NA	NA	NA	NA	NA	NA	NA	NA	NA	NA	NA	NA	NA	NA	NA	NA	NA	NA	NA	NA
1017	STIL	2.64973	5.37214	21.0996	4.36e-06	0.000110388	2.64983	5.37052	21.0019	4.58826e-06	0.000188945	1.51655	5.98022	96.8803	7.36e-23	7.7e-22	1.51642	5.97878	96.8624	7.43175e-23	1.34584e-21	NA	NA	NA	NA	NA	NA	NA	NA	NA	NA	NA	NA	NA	NA	NA	NA	NA	NA	NA	NA	NA	NA	NA	NA	NA	NA	NA
1018	DIO2	1.54852	3.79089	2.20844	0.137257	0.316704	1.54863	3.78924	2.19631	0.138341	0.51243	1.51651	2.57109	6.84705	0.00887879	0.0159553	1.51638	2.56966	6.84581	0.00888492	0.0276372	NA	NA	NA	NA	NA	NA	NA	NA	NA	NA	NA	NA	NA	NA	NA	NA	NA	NA	NA	NA	NA	NA	NA	NA	NA	NA	NA
1019	TET3	1.45574	4.26372	9.46073	0.00209918	0.0172398	1.45585	4.26208	9.42641	0.00213883	0.0287587	1.51637	3.55025	15.9181	6.61e-05	0.000173685	1.51624	3.54882	15.9151	6.62467e-05	0.000301021	NA	NA	NA	NA	NA	NA	NA	NA	NA	NA	NA	NA	NA	NA	NA	NA	NA	NA	NA	NA	NA	NA	NA	NA	NA	NA	NA
1020	HIST1H2BN	1.89844	1.75501	2.29492	0.129798	0.3049	1.89855	1.75337	2.28421	0.130697	0.494383	1.51419	1.53488	2.08913	0.148351	0.197698	1.51407	1.53346	2.08878	0.148385	0.336778	0.224511	0.918605	4.09158	81	NA	NA	NA	NA	NA	NA	NA	NA	NA	NA	NA	NA	NA	NA	NA	NA	NA	NA	NA	NA	NA	NA	NA
1021	MCCC1	1.65828	5.33659	17.4683	2.92e-05	0.000560765	1.65838	5.33496	17.3749	3.06847e-05	0.000955174	1.51271	5.23874	56.7302	5e-14	3.12e-13	1.51257	5.2373	56.7197	5.02585e-14	5.42354e-13	NA	NA	NA	NA	NA	NA	NA	NA	NA	NA	NA	NA	NA	NA	NA	NA	NA	NA	NA	NA	NA	NA	NA	NA	NA	NA	NA
1022	MFN1	1.42925	6.34328	10.6504	0.00110045	0.0106653	1.42935	6.34164	10.6576	0.00109621	0.0174137	1.51257	6.59981	149.181	2.62e-34	4.09e-33	1.51243	6.59836	149.154	2.65445e-34	7.17042e-33	NA	NA	NA	NA	NA	NA	NA	NA	2.59819	0.0360475	0.0138741	2	6.79524	0	0	1	2.63424	521620	741	3.33333	2.11655	0.803477	3	0.0523929	0.782931	3.29767	0.000974917
1023	TMEM126A	1.79516	4.82521	20.8286	5.02e-06	0.00012399	1.79525	4.82358	20.7609	5.20342e-06	0.000209762	1.51236	4.76626	40.159	2.34e-10	1.12e-09	1.51222	4.76482	40.1515	2.35009e-10	1.9463e-09	NA	NA	NA	NA	-3.77628	4.32346	-1.1449	2	1.5811	0.898676	0.568386	3	-0.130611	1.0192	-7.80331	4	0.847817	406415	195	3.57143	1.35149	1.59408	7	0.00970632	0.352331	2.37876	0.017371
1024	IST1	1.46105	7.67477	16.2753	5.48e-05	0.000939246	1.46115	7.67314	16.3352	5.30696e-05	0.00150956	1.50964	7.63243	304.022	4.38e-68	1.48e-66	1.50951	7.63099	303.966	4.50645e-68	2.64886e-66	-1.09112	0	0	1	0.431734	0.661316	1.53177	2	0.260909	0.720843	2.76281	20	0.15679	0.509965	3.25253	21	0.207942	556383	379	3.5122	0.592432	2.84903	41	-0.000311132	0.13122	1.58706	0.1125
1025	IST1	1.46105	7.67477	16.2753	5.48e-05	0.000939246	0.20577	1.05204	0.0100782	0.920035	1	1.50964	7.63243	304.022	4.38e-68	1.48e-66	-0.403888	1.06038	0.07117	0.789641	1	-1.09112	0	0	1	0.431734	0.661316	1.53177	2	0.260909	0.720843	2.76281	20	0.15679	0.509965	3.25253	21	0.207942	556383	379	3.5122	0.592432	2.84903	41	-0.000311132	0.13122	1.58706	0.1125
1026	ZNF326	1.84087	5.56622	24.5165	7.37e-07	2.32e-05	1.84097	5.5646	24.4262	7.72133e-07	3.99213e-05	1.50846	5.67711	77.3474	1.43e-18	1.18e-17	1.50833	5.67567	77.333	1.44433e-18	2.06335e-17	0.198679	0.0996862	0.501744	2	0.5819	0.529975	0.910767	4	0.9842	1.29198	1.31272	16	-0.509643	0.533491	-1.04679	10	0.0222809	656107	582	3.38462	1.70715	76.6197	26	0.00516414	0.158784	0.107799	0.914155
1027	LLPH	1.59881	4.9716	14.9493	0.000110439	0.00171748	1.5989	4.96997	14.8917	0.000113863	0.00288841	1.50756	5.00625	47.6253	5.16e-12	2.79e-11	1.50743	5.00481	47.6164	5.18319e-12	4.84325e-11	0.535455	0.0699737	0.130681	2	1.25677	1.19738	0.95274	3	0.93631	1.12832	1.20507	4	0.868676	2.64478	3.04461	3	0.868676	1.02234e+06	129	3.42857	1.15637	1.33119	7	0.0127678	0.394206	2.17122	0.0299146
1028	NOL11	2.01274	6.49722	16.4237	5.06e-05	0.000887459	2.01285	6.49559	16.4237	5.06492e-05	0.00145404	1.50694	6.75474	165.15	8.48e-38	1.49e-36	1.50681	6.75329	165.119	8.61578e-38	2.62376e-36	NA	NA	NA	NA	NA	NA	NA	NA	0.240383	2.95661	12.2996	10	0.938684	1.76572	1.88106	8	0.412465	213568	719	3.44444	1.34003	3.24883	18	0.00544733	0.184692	2.20377	0.0275407
1029	STRBP	2.57054	3.13511	10.3619	0.00128646	0.0119853	2.57066	3.13348	10.307	0.00132523	0.0201204	1.50656	2.90887	9.202	0.0024175	0.00485377	1.50643	2.90744	9.20032	0.00241972	0.0084079	NA	NA	NA	NA	NA	NA	NA	NA	NA	NA	NA	NA	NA	NA	NA	NA	NA	NA	NA	NA	NA	NA	NA	NA	NA	NA	NA
1030	NAALAD2	1.25038	1.67766	0.990551	0.319608	0.531894	1.25045	1.67601	0.986367	0.320632	0.834928	1.50603	1.61368	2.31748	0.127927	0.173525	1.50591	1.61226	2.31708	0.12796	0.296809	NA	NA	NA	NA	NA	NA	NA	NA	NA	NA	NA	NA	NA	NA	NA	NA	NA	NA	NA	NA	NA	NA	NA	NA	NA	NA	NA
1031	OTX1	NA	NA	NA	NA	NA	1.58223	1.33759	0.842866	0.358578	0.883245	1.505	1.52384	2.03313	0.153904	0.204292	1.50488	1.52241	2.03279	0.153938	0.347865	NA	NA	NA	NA	NA	NA	NA	NA	NA	NA	NA	NA	NA	NA	NA	NA	NA	NA	NA	NA	NA	NA	NA	NA	NA	NA	NA
1032	RP9	1.65997	3.61806	10.012	0.00155522	0.0139094	1.66005	3.61642	9.92234	0.00163284	0.0236177	1.50407	3.81636	19.3772	1.07e-05	3.15e-05	1.50393	3.81493	19.3736	1.0748e-05	5.45515e-05	NA	NA	NA	NA	NA	NA	NA	NA	NA	NA	NA	NA	NA	NA	NA	NA	NA	NA	NA	NA	NA	NA	NA	NA	NA	NA	NA
1033	PRPF40A	1.58417	7.97077	14.8913	0.000113886	0.00175832	1.58428	7.96914	14.9282	0.00011168	0.00284514	1.50385	7.94256	373.232	3.7e-83	1.58e-81	1.50372	7.94111	373.162	3.83508e-83	2.83163e-81	NA	NA	NA	NA	NA	NA	NA	NA	0.281653	0.602613	2.13956	15	0.320399	0.609578	1.90256	18	0.28939	1.2945e+06	957	3.54545	0.533805	1.84459	33	0.0102468	0.141868	1.96763	0.0491109
1034	UBC	1.12814	11.511	7.81236	0.00518901	0.0340142	1.12825	11.5094	7.83756	0.00511715	0.0552206	1.50342	11.815	1216.2	1.84e-266	3.85e-264	1.50329	11.8135	1217.74	8.49491e-267	3.13611e-264	NA	NA	NA	NA	NA	NA	NA	NA	NA	NA	NA	NA	NA	NA	NA	NA	NA	NA	NA	NA	NA	NA	NA	NA	NA	NA	NA
1035	ATXN1L	1.37978	4.99068	13.7736	0.000206219	0.00282447	1.37988	4.98905	13.709	0.000213428	0.00475793	1.50309	4.25966	27.2218	1.81e-07	6.54e-07	1.50296	4.25823	27.2168	1.81873e-07	1.13498e-06	NA	NA	NA	NA	NA	NA	NA	NA	NA	NA	NA	NA	NA	NA	NA	NA	NA	NA	NA	NA	NA	NA	NA	NA	NA	NA	NA
1036	DDX20	1.92469	5.6544	22.2319	2.42e-06	6.53e-05	1.92479	5.65277	22.1633	2.50412e-06	0.000110239	1.50281	5.45302	65.4546	5.95e-16	4.18e-15	1.50268	5.45158	65.4424	5.98366e-16	7.28249e-15	NA	NA	NA	NA	NA	NA	NA	NA	-0.532875	0	0	1	-2.00511	0	0	1	-1.26899	231214	824	3.5	0.736119	-0.580081	2	0.0730381	1.44834	-0.926599	0.354135
1037	BOD1L1	1.44578	7.52637	15.6198	7.74e-05	0.00126872	1.44588	7.52474	15.6734	7.52745e-05	0.00203861	1.50256	7.23185	228.795	1.09e-51	2.75e-50	1.50243	7.2304	228.752	1.11546e-51	4.8497e-50	NA	NA	NA	NA	NA	NA	NA	NA	0.905353	0.125851	0.139008	2	2.68953	1.63151	0.606617	5	2.55062	112930	3051	3.71429	2.09558	0.821595	7	0.00890769	0.374598	6.78518	1.15939e-11
1038	F3	-1.6162	4.60593	1.70588	0.191521	0.39011	-1.61616	4.6043	1.70075	0.19219	0.624982	1.502	5.20143	54.5459	1.52e-13	9.16e-13	1.50187	5.19999	54.5358	1.52645e-13	1.59173e-12	NA	NA	NA	NA	NA	NA	NA	NA	NA	NA	NA	NA	NA	NA	NA	NA	NA	NA	NA	NA	NA	NA	NA	NA	NA	NA	NA
1039	ILF2	2.13408	8.28509	19.2864	1.13e-05	0.000248614	2.13419	8.28346	19.3098	1.11136e-05	0.000401827	1.50199	8.45393	498.027	2.55e-110	1.51e-108	1.50186	8.45248	497.928	2.68361e-110	2.7547e-108	0.197985	1.08963	5.50357	36	0.2064	0.665006	3.22192	37	0.230961	0.921012	3.98775	92	0.147871	0.842624	5.69839	107	0.191242	1.32389e+06	390	3.53769	0.873045	4.56513	199	0.000334178	0.0573684	3.32775	0.000875505
1040	SMEK1	1.20619	7.22359	9.5319	0.00201931	0.0167442	1.2063	7.22196	9.55419	0.00199493	0.027293	1.50147	6.96406	189.828	3.47e-43	7.16e-42	1.50133	6.96262	189.793	3.52833e-43	1.2627e-41	1.00202	0	0	1	NA	NA	NA	NA	0.460451	1.20809	2.62372	4	0.850523	1.29996	1.52843	8	0.828127	300525	833	3.66667	0.978869	1.18203	12	-0.00314528	0.253473	3.27953	0.00103979
1041	SMOX	1.17651	5.09256	2.56352	0.109355	0.273553	1.17663	5.09091	2.55442	0.109986	0.444914	1.50128	5.54655	69.882	6.3e-17	4.69e-16	1.50115	5.54511	69.869	6.33769e-17	8.17682e-16	NA	NA	NA	NA	NA	NA	NA	NA	NA	NA	NA	NA	NA	NA	NA	NA	NA	NA	NA	NA	NA	NA	NA	NA	NA	NA	NA
1042	CHMP2B	0.986222	5.81567	6.80305	0.00910023	0.0502741	0.986323	5.81404	6.79507	0.00914098	0.0825327	1.50058	6.51246	138.376	6.03e-32	8.79e-31	1.50045	6.51101	138.35	6.10981e-32	1.54159e-30	NA	NA	NA	NA	NA	NA	NA	NA	NA	NA	NA	NA	NA	NA	NA	NA	NA	NA	NA	NA	NA	NA	NA	NA	NA	NA	NA
1043	COPS2	1.47559	7.60086	8.38194	0.00378968	0.0271074	1.47571	7.59922	8.38566	0.00378192	0.0443359	1.5	7.69539	313.859	3.15e-70	1.11e-68	1.49986	7.69394	313.801	3.24556e-70	1.97388e-68	-0.293429	0.00384376	-0.0130995	2	-0.0334283	0	0	1	0.0340986	0.560779	16.4458	26	-0.134778	0.779618	-5.78445	25	-0.000922292	588087	450	3.4902	0.68233	-739.82	51	-0.00275804	0.114554	0.0160251	0.987214
1044	ZNF778	1.46363	3.71022	6.72057	0.00953069	0.0519249	1.46375	3.70858	6.67611	0.00977135	0.0864549	1.49935	3.36372	13.416	0.000249486	0.000596011	1.49922	3.36229	13.4135	0.000249816	0.00103299	NA	NA	NA	NA	NA	NA	NA	NA	NA	NA	NA	NA	NA	NA	NA	NA	NA	NA	NA	NA	NA	NA	NA	NA	NA	NA	NA
1045	CPE	1.29297	4.35648	2.98652	0.0839603	0.230287	1.29306	4.35485	2.97782	0.0844128	0.375221	1.49662	3.9597	21.4771	3.58e-06	1.12e-05	1.49649	3.95827	21.4731	3.58833e-06	1.94863e-05	NA	NA	NA	NA	NA	NA	NA	NA	NA	NA	NA	NA	NA	NA	NA	NA	NA	NA	NA	NA	NA	NA	NA	NA	NA	NA	NA
1046	HHEX	0.849826	1.69852	0.453188	0.500825	0.691016	0.850018	1.69688	0.448488	0.503054	1	1.49629	2.44533	5.92988	0.0148863	0.0254348	1.49616	2.4439	5.9288	0.0148954	0.044023	NA	NA	NA	NA	NA	NA	NA	NA	NA	NA	NA	NA	NA	NA	NA	NA	NA	NA	NA	NA	NA	NA	NA	NA	NA	NA	NA
1047	TRABD2A	0.0192131	1.92282	0.000358399	0.984896	0.992967	0.0193332	1.92118	0.000360688	0.984848	1	1.49518	1.64001	2.37365	0.123398	0.168081	1.49506	1.63859	2.37325	0.12343	0.287794	NA	NA	NA	NA	NA	NA	NA	NA	NA	NA	NA	NA	NA	NA	NA	NA	NA	NA	NA	NA	NA	NA	NA	NA	NA	NA	NA
1048	DNAJC3	1.29394	6.39813	7.39837	0.0065283	0.0401341	1.29406	6.3965	7.4004	0.00652092	0.0658129	1.49392	6.25343	114.457	1.03e-26	1.25e-25	1.49379	6.25198	114.436	1.04588e-26	2.18338e-25	-1.58702	4.51979	-2.84797	3	NA	NA	NA	NA	0.385399	0.696512	1.80725	11	1.51855	5.53685	3.64613	16	0.912137	643969	504	3.59259	2.19807	2.4098	27	-0.00128312	0.157914	5.78427	7.28273e-09
1049	JUP	4.28962	4.64586	6.21851	0.0126422	0.0639765	4.28973	4.64423	6.19989	0.0127758	0.105594	1.49305	4.76368	39.1998	3.83e-10	1.8e-09	1.49292	4.76224	39.1924	3.84027e-10	3.12856e-09	NA	NA	NA	NA	-6.48187	0	0	1	-5.50854	1.99531	-0.362222	7	NA	NA	NA	NA	-5.50854	427682	745	3	1.99531	-0.362222	7	-0.00221935	0.337207	-16.3292	6.11782e-60
1050	MIER3	1.10887	5.24701	6.40378	0.0113878	0.059199	1.10897	5.24537	6.36989	0.0116072	0.0982207	1.49176	5.38596	61.5704	4.27e-15	2.86e-14	1.49162	5.38452	61.5588	4.29709e-15	4.97928e-14	NA	NA	NA	NA	NA	NA	NA	NA	NA	NA	NA	NA	NA	NA	NA	NA	NA	NA	NA	NA	NA	NA	NA	NA	NA	NA	NA
1051	OCIAD2	1.77305	3.67054	11.3688	0.000746887	0.00790875	1.77316	3.6689	11.2654	0.000789659	0.0135316	1.49145	3.03513	10.0889	0.00149165	0.00312119	1.49132	3.0337	10.087	0.00149316	0.005408	NA	NA	NA	NA	NA	NA	NA	NA	NA	NA	NA	NA	NA	NA	NA	NA	NA	NA	NA	NA	NA	NA	NA	NA	NA	NA	NA
1052	GPR161	1.09698	4.11384	4.57514	0.032439	0.123176	1.0971	4.1122	4.55332	0.0328551	0.203583	1.49065	4.89325	42.9981	5.48e-11	2.75e-10	1.49052	4.89181	42.9901	5.50187e-11	4.78808e-10	NA	NA	NA	NA	NA	NA	NA	NA	NA	NA	NA	NA	NA	NA	NA	NA	NA	NA	NA	NA	NA	NA	NA	NA	NA	NA	NA
1053	ARMC5	1.46541	5.17936	12.0858	0.000508066	0.00581856	1.46551	5.17773	12.0256	0.000524761	0.00984097	1.49058	5.00334	46.6021	8.7e-12	4.64e-11	1.49045	5.0019	46.5933	8.73566e-12	8.05894e-11	NA	NA	NA	NA	NA	NA	NA	NA	5.83511	0	0	1	NA	NA	NA	NA	5.83511	217606	1030	3	0	0	1	0.0192617	2.13689	2.72164	0.00649581
1054	CGNL1	-0.175183	3.15068	0.0716941	0.788886	0.884402	-0.175115	3.14903	0.0711458	0.789676	1	1.48776	1.59862	2.22076	0.136166	0.18339	1.48764	1.5972	2.22038	0.136199	0.3134	NA	NA	NA	NA	NA	NA	NA	NA	-0.70068	0	0	1	NA	NA	NA	NA	-0.70068	918576	1302	3	0	0	1	0.0899926	2.04547	-0.386548	0.699091
1055	UBB	1.76616	9.61042	18.3669	1.82e-05	0.000374321	1.76627	9.6088	18.4199	1.772e-05	0.000597566	1.4868	10.1272	923.711	6.88e-203	9.39e-201	1.48666	10.1257	925.009	3.59054e-203	8.58589e-201	NA	NA	NA	NA	NA	NA	NA	NA	NA	NA	NA	NA	NA	NA	NA	NA	NA	NA	NA	NA	NA	NA	NA	NA	NA	NA	NA
1056	GOPC	0.692582	7.58598	3.23136	0.0722405	0.208971	0.692693	7.58434	3.24028	0.0718483	0.339068	1.48512	7.75032	320.255	1.27e-71	4.6e-70	1.48499	7.74888	320.195	1.31378e-71	8.20353e-70	NA	NA	NA	NA	NA	NA	NA	NA	-0.0537461	1.06332	-19.7841	29	0.0996941	1.56673	15.7154	25	0.048526	321445	462	3.46296	1.10705	22.8136	54	0.000821347	0.109501	0.435655	0.663087
1057	ULK4	0.872172	2.65856	1.13629	0.286437	0.49971	0.872224	2.65692	1.12603	0.288624	0.791338	1.48316	2.3289	5.20381	0.0225374	0.0369045	1.48303	2.32747	5.20286	0.0225497	0.0638645	NA	NA	NA	NA	NA	NA	NA	NA	NA	NA	NA	NA	NA	NA	NA	NA	NA	NA	NA	NA	NA	NA	NA	NA	NA	NA	NA
1058	ENPP2	-0.021426	3.05495	0.00126751	0.9716	0.985469	-0.0213757	3.0533	0.00125204	0.971773	1	1.48022	1.59532	2.19081	0.138836	0.18647	1.4801	1.59389	2.19043	0.13887	0.318466	NA	NA	NA	NA	NA	NA	NA	NA	-2.9308	0	0	1	NA	NA	NA	NA	-2.9308	124354	915	3	0	0	1	0.136762	2.09723	-1.46267	0.143556
1059	HAP1	2.63048	1.48433	2.45859	0.116883	0.284866	2.63061	1.48269	2.44249	0.118089	0.463955	1.47973	1.42973	1.70629	0.191467	0.246207	1.47961	1.4283	1.70601	0.191504	0.416734	NA	NA	NA	NA	NA	NA	NA	NA	NA	NA	NA	NA	NA	NA	NA	NA	NA	NA	NA	NA	NA	NA	NA	NA	NA	NA	NA
1060	MPP5	1.28045	6.79524	13.7737	0.000206202	0.00282447	1.28055	6.79361	13.816	0.000201607	0.00453734	1.4782	7.14857	209.923	1.43e-47	3.34e-46	1.47806	7.14712	209.884	1.45629e-47	5.89322e-46	NA	NA	NA	NA	NA	NA	NA	NA	-0.473372	1.07305	-2.26683	4	0.0809408	3.12506	38.6092	3	-0.163338	576126	675	3.42857	1.29377	-7.92085	7	0.0140385	0.354631	-0.500171	0.616955
1061	MEX3B	0.853263	4.89248	4.97558	0.0257075	0.105766	0.853366	4.89084	4.9588	0.0259581	0.17385	1.47615	5.17328	51.8399	6.02e-13	3.51e-12	1.47602	5.17184	51.8301	6.05169e-13	6.11064e-12	NA	NA	NA	NA	NA	NA	NA	NA	NA	NA	NA	NA	NA	NA	NA	NA	NA	NA	NA	NA	NA	NA	NA	NA	NA	NA	NA
1062	UTP14A	1.94686	5.74804	16.742	4.28e-05	0.000769199	1.94697	5.74641	16.6931	4.39403e-05	0.00128479	1.47318	5.47438	64.1919	1.13e-15	7.8e-15	1.47304	5.47294	64.1797	1.13571e-15	1.35943e-14	-0.563777	0	0	1	-3.52964	1.83882	-0.520967	2	-0.21483	1.14775	-5.34261	12	-0.47206	0.715312	-1.5153	9	-0.357859	417554	771	3.42857	0.917018	-2.56251	21	0.000628032	0.177518	-2.01943	0.043442
1063	USPL1	1.58146	5.41638	18.9082	1.37e-05	0.000292549	1.58156	5.41475	18.8106	1.44361e-05	0.000502114	1.47223	5.37934	59.8802	1.01e-14	6.6e-14	1.47209	5.3779	59.8688	1.01397e-14	1.14838e-13	NA	NA	NA	NA	NA	NA	NA	NA	NA	NA	NA	NA	NA	NA	NA	NA	NA	NA	NA	NA	NA	NA	NA	NA	NA	NA	NA
1064	MAF	-0.424437	3.35953	0.497951	0.480402	0.674871	-0.424383	3.35788	0.494275	0.482027	1	1.47154	1.51892	1.94	0.163668	0.215348	1.47142	1.5175	1.93967	0.163704	0.366135	NA	NA	NA	NA	NA	NA	NA	NA	NA	NA	NA	NA	NA	NA	NA	NA	NA	NA	NA	NA	NA	NA	NA	NA	NA	NA	NA
1065	FBXO30	1.25285	5.56108	9.19609	0.00242532	0.0192306	1.25295	5.55944	9.1618	0.00247119	0.0320007	1.47045	5.34181	58.1595	2.42e-14	1.54e-13	1.47032	5.34036	58.1485	2.43062e-14	2.6821e-13	NA	NA	NA	NA	NA	NA	NA	NA	NA	NA	NA	NA	NA	NA	NA	NA	NA	NA	NA	NA	NA	NA	NA	NA	NA	NA	NA
1066	STPG1	1.43762	2.98006	1.80285	0.179368	0.37455	1.43769	2.97842	1.78654	0.181348	0.603814	1.46963	2.92912	8.97024	0.00274413	0.00543947	1.4695	2.92769	8.96856	0.00274664	0.00942097	NA	NA	NA	NA	NA	NA	NA	NA	NA	NA	NA	NA	NA	NA	NA	NA	NA	NA	NA	NA	NA	NA	NA	NA	NA	NA	NA
1067	GLS	1.95734	9.01331	7.61513	0.00578807	0.036797	1.95741	9.01171	7.60623	0.00581669	0.0604669	1.46728	9.09542	687.307	1.72e-151	1.7e-149	1.46715	9.09397	689.312	6.3074e-152	1.07908e-149	0.135377	0.826438	6.10472	3	-4.7095	3.47828	-0.738565	2	0.798906	0.631794	0.790824	90	0.618909	1.41648	2.28868	94	0.773177	812747	598	3.51087	0.971711	1.25678	184	-0.000915472	0.0592349	13.0682	5.004e-39
1068	ADNP2	1.57138	5.98879	19.516	9.98e-06	0.000223525	1.57147	5.98716	19.5406	9.84833e-06	0.000362305	1.46691	5.77387	78.936	6.42e-19	5.42e-18	1.46677	5.77243	78.9209	6.46469e-19	9.46012e-18	NA	NA	NA	NA	NA	NA	NA	NA	NA	NA	NA	NA	NA	NA	NA	NA	NA	NA	NA	NA	NA	NA	NA	NA	NA	NA	NA
1069	TOPORS	2.30258	6.38831	37.1703	1.08e-09	7.41e-08	2.30269	6.38669	37.2611	1.03323e-09	1.17526e-07	1.46417	6.0031	92.5831	6.46e-22	6.5e-21	1.46404	6.00165	92.5654	6.51371e-22	1.13655e-20	NA	NA	NA	NA	NA	NA	NA	NA	NA	NA	NA	NA	NA	NA	NA	NA	NA	NA	NA	NA	NA	NA	NA	NA	NA	NA	NA
1070	SNRNP70	1.25339	8.35094	5.30236	0.0212966	0.0927998	1.25347	8.34932	5.30211	0.0212996	0.151832	1.46415	8.26608	434.047	2.14e-96	1.07e-94	1.46402	8.26463	433.686	2.56283e-96	2.21933e-94	-0.181418	0.997269	-5.49707	6	NA	NA	NA	NA	0.131625	0.710994	5.40168	26	-0.12081	1.86685	-15.4528	28	0.0441937	1.0483e+06	437	3.51852	0.952176	21.5455	54	-0.00123277	0.106995	0.424567	0.671153
1071	DIRC2	1.24008	4.77152	9.37159	0.00220374	0.0178703	1.24017	4.76988	9.34313	0.00223823	0.0296407	1.46411	4.91133	42.2188	8.16e-11	4.04e-10	1.46398	4.9099	42.2107	8.19491e-11	7.01854e-10	NA	NA	NA	NA	NA	NA	NA	NA	NA	NA	NA	NA	NA	NA	NA	NA	NA	NA	NA	NA	NA	NA	NA	NA	NA	NA	NA
1072	FAM89A	2.00396	2.67438	4.936	0.0263029	0.107119	2.00407	2.67274	4.89356	0.0269571	0.178307	1.46306	1.65506	2.33214	0.126728	0.172013	1.46294	1.65364	2.33173	0.126761	0.294289	NA	NA	NA	NA	NA	NA	NA	NA	NA	NA	NA	NA	NA	NA	NA	NA	NA	NA	NA	NA	NA	NA	NA	NA	NA	NA	NA
1073	UBL3	1.82797	4.79712	12.644	0.000376773	0.00451601	1.82807	4.7955	12.5938	0.000387026	0.00756895	1.46272	4.83811	39.9415	2.62e-10	1.25e-09	1.46259	4.83667	39.9339	2.62703e-10	2.16617e-09	NA	NA	NA	NA	NA	NA	NA	NA	NA	NA	NA	NA	1.3076	0	0	1	1.3076	35996.8	117	4	0	0	1	0.0570543	2.00989	0.622197	0.533812
1074	LUC7L2	2.84438	3.28712	5.34339	0.020801	0.0913665	1.17639	7.04371	11.0313	0.000895847	0.0148815	1.46189	3.73533	17.2955	3.2e-05	8.8e-05	1.23944	7.10979	149.242	2.53873e-34	6.87548e-33	NA	NA	NA	NA	NA	NA	NA	NA	0.433167	0.69594	1.60663	3	1.27216	3.05152	2.3987	27	1.17675	363203	392	3.9	2.52743	2.1478	30	0.00790588	0.145035	8.05906	7.68807e-16
1075	LUC7L2	2.84438	3.28712	5.34339	0.020801	0.0913665	-0.190026	3.46381	0.126154	0.722453	1	1.46189	3.73533	17.2955	3.2e-05	8.8e-05	-0.532921	3.01744	1.45887	0.227111	0.480503	NA	NA	NA	NA	NA	NA	NA	NA	0.433167	0.69594	1.60663	3	1.27216	3.05152	2.3987	27	1.17675	363203	392	3.9	2.52743	2.1478	30	0.00790588	0.145035	8.05906	7.68807e-16
1076	LUC7L2	2.84438	3.28712	5.34339	0.020801	0.0913665	2.84447	3.28548	5.32256	0.0210511	0.150519	1.46189	3.73533	17.2955	3.2e-05	8.8e-05	1.46176	3.73389	17.2922	3.20497e-05	0.00015255	NA	NA	NA	NA	NA	NA	NA	NA	0.433167	0.69594	1.60663	3	1.27216	3.05152	2.3987	27	1.17675	363203	392	3.9	2.52743	2.1478	30	0.00790588	0.145035	8.05906	7.68807e-16
1077	ZNF91	1.64098	5.28208	19.8963	8.18e-06	0.0001881	1.64108	5.28045	19.7632	8.76546e-06	0.000327042	1.46132	4.43684	29.6126	5.28e-08	2.03e-07	1.46119	4.4354	29.607	5.29143e-08	3.51809e-07	NA	NA	NA	NA	NA	NA	NA	NA	NA	NA	NA	NA	NA	NA	NA	NA	NA	NA	NA	NA	NA	NA	NA	NA	NA	NA	NA
1078	DOHH	1.98228	4.50915	20.1438	7.18e-06	0.000168582	1.98238	4.50752	20.1011	7.34537e-06	0.000282059	1.45955	4.47765	30.4652	3.4e-08	1.33e-07	1.45942	4.47622	30.4594	3.40924e-08	2.31049e-07	NA	NA	NA	NA	1.40151	0	0	1	NA	NA	NA	NA	-0.251496	0	0	1	-0.251496	453976	302	4	0	0	1	0.138286	2.09649	-0.185921	0.852506
1079	PUM1	1.55697	7.83447	17.5651	2.78e-05	0.000536134	1.55708	7.83284	17.6268	2.68779e-05	0.000856957	1.45899	7.76305	313.149	4.5e-70	1.58e-68	1.45885	7.7616	313.089	4.63802e-70	2.81262e-68	-0.226004	0.128067	-0.566658	2	NA	NA	NA	NA	0.128737	0.319949	2.4853	4	3.67232	5.63024	1.53316	7	0.171071	300548	1224	3.63636	4.46154	26.0801	11	-0.00214901	0.264588	0.654676	0.512676
1080	TBCC	0.825759	5.04345	5.13945	0.0233881	0.0993375	0.825857	5.04181	5.11424	0.0237302	0.164046	1.45711	4.86615	40.4994	1.97e-10	9.49e-10	1.45697	4.86471	40.4916	1.97459e-10	1.64821e-09	0.252236	0	0	1	NA	NA	NA	NA	0.270946	1.0378	3.83029	4	0.326159	1.95967	6.00832	4	0.270946	458913	346	3.5	0.938531	3.46391	8	0.0169402	0.319132	0.795927	0.426075
1081	USP15	0.899341	6.44983	6.1352	0.0132516	0.0659556	0.899453	6.44819	6.14983	0.0131425	0.107526	1.45682	6.31171	114.113	1.23e-26	1.48e-25	1.45668	6.31026	114.091	1.2447e-26	2.58307e-25	NA	NA	NA	NA	0.821093	0	0	1	1.44101	1.01246	0.702605	3	1.06271	0.908252	0.854655	2	1.44101	269089	981	3.4	1.53758	1.06702	5	0.0181551	0.437083	3.25534	0.00113256
1082	USP25	0.322342	5.85424	0.878916	0.348499	0.558371	0.322446	5.85259	0.879048	0.348463	0.87035	1.45644	6.1425	101.234	8.17e-24	8.85e-23	1.45631	6.14105	101.215	8.25391e-24	1.54663e-22	NA	NA	NA	NA	NA	NA	NA	NA	NA	NA	NA	NA	NA	NA	NA	NA	NA	NA	NA	NA	NA	NA	NA	NA	NA	NA	NA
1083	TWISTNB	1.62758	5.6718	13.952	0.000187539	0.00260469	1.62768	5.67016	13.9045	0.000192332	0.00435656	1.45623	5.71291	74.6057	5.75e-18	4.58e-17	1.45609	5.71146	74.5914	5.78946e-18	7.99393e-17	NA	NA	NA	NA	NA	NA	NA	NA	-0.723387	0	0	1	NA	NA	NA	NA	-0.723387	273885	338	3	0	0	1	0.097947	2.17705	-0.377269	0.705973
1084	PGBD5	0.385776	3.55993	0.0599964	0.806502	0.894647	0.385922	3.55827	0.0598179	0.806784	1	1.45523	1.4522	1.717	0.19008	0.244696	1.45512	1.45078	1.71671	0.190118	0.414403	NA	NA	NA	NA	NA	NA	NA	NA	NA	NA	NA	NA	NA	NA	NA	NA	NA	NA	NA	NA	NA	NA	NA	NA	NA	NA	NA
1085	ERN1	-0.0629855	3.44623	0.0148251	0.90309	0.950306	-0.0629285	3.44458	0.0146746	0.903581	1	1.45503	3.21418	11.247	0.000797511	0.00175484	1.45489	3.21275	11.2449	0.000798428	0.00303986	NA	NA	NA	NA	NA	NA	NA	NA	NA	NA	NA	NA	NA	NA	NA	NA	NA	NA	NA	NA	NA	NA	NA	NA	NA	NA	NA
1086	EIF2C3	0.627503	4.53445	2.69901	0.10041	0.258018	0.627599	4.53281	2.6936	0.100752	0.419246	1.45461	4.05277	21.9541	2.79e-06	8.89e-06	1.45448	4.05134	21.9499	2.79859e-06	1.54164e-05	NA	NA	NA	NA	NA	NA	NA	NA	NA	NA	NA	NA	NA	NA	NA	NA	NA	NA	NA	NA	NA	NA	NA	NA	NA	NA	NA
1087	TMED7	1.49771	6.62104	16.1781	5.77e-05	0.000982153	1.4978	6.61941	16.2104	5.66809e-05	0.00158398	1.45199	6.29622	112.196	3.24e-26	3.83e-25	1.45185	6.29477	112.174	3.27264e-26	6.69905e-25	NA	NA	NA	NA	0.494984	0.656229	1.32576	6	NA	NA	NA	NA	NA	NA	NA	NA	NA	NA	NA	NA	NA	NA	NA	NA	NA	NA	NA
1088	TCP1	2.0815	8.33749	16.7127	4.35e-05	0.000778852	2.08162	8.33586	16.7269	4.31643e-05	0.00126858	1.45022	8.71916	547.051	5.52e-121	3.75e-119	1.45009	8.71771	547.665	4.05547e-121	4.76756e-119	0.0424909	1.01616	23.9148	59	0.533818	0.725148	1.35842	35	0.258154	0.636676	2.46626	191	-0.0639688	0.977903	-15.2872	166	0.149347	1.97982e+06	556	3.46499	0.827787	5.54272	357	0.000697106	0.0418829	3.54917	0.000386443
1089	YTHDF3	1.62388	7.96706	19.4992	1.01e-05	0.000225106	1.62399	7.96544	19.5731	9.68244e-06	0.000356826	1.44986	7.79478	316.457	8.56e-71	3.05e-69	1.44973	7.79333	316.396	8.83101e-71	5.44959e-69	-1.11969	0.305686	-0.273009	4	NA	NA	NA	NA	-0.661906	1.45201	-2.19368	14	-1.00321	0.372461	-0.37127	7	-0.887595	1.08635e+06	585	3.33333	1.14139	-1.28594	21	0.00872289	0.185235	-4.83881	1.30619e-06
1090	TOP1	2.12269	8.08278	20.8384	5e-06	0.000123589	2.12281	8.08116	20.8722	4.90978e-06	0.000199453	1.44849	8.19133	413.788	5.49e-92	2.64e-90	1.44836	8.18988	413.708	5.71505e-92	4.73471e-90	0.807632	0.295349	0.365698	3	0.828753	0.305926	0.369139	2	0.724679	0.679754	0.938007	64	0.738639	1.59761	2.16291	64	0.727652	1.09164e+06	765	3.5	0.862452	1.18525	128	-0.00317331	0.068863	10.6128	2.5998e-26
1091	TMEM212	1.36043	2.21104	2.26791	0.132078	0.308655	1.3605	2.2094	2.25711	0.133002	0.500442	1.44536	1.948	3.29733	0.0693928	0.101305	1.44523	1.94658	3.29672	0.0694182	0.174274	NA	NA	NA	NA	NA	NA	NA	NA	NA	NA	NA	NA	NA	NA	NA	NA	NA	NA	NA	NA	NA	NA	NA	NA	NA	NA	NA
1092	FAM46A	0.315885	7.11296	0.401702	0.526211	0.709952	0.31601	7.11131	0.402023	0.526046	1	1.44524	6.5744	135.291	2.85e-31	4.04e-30	1.4451	6.57295	135.265	2.8894e-31	7.08645e-30	NA	NA	NA	NA	NA	NA	NA	NA	NA	NA	NA	NA	NA	NA	NA	NA	NA	NA	NA	NA	NA	NA	NA	NA	NA	NA	NA
1093	UTP6	1.82074	6.27229	22.6196	1.97e-06	5.52e-05	1.82084	6.27066	22.6586	1.93488e-06	8.85122e-05	1.44461	6.45316	124.182	7.68e-29	1.02e-27	1.44448	6.45172	124.158	7.77864e-29	1.78892e-27	NA	NA	NA	NA	NA	NA	NA	NA	4.27838	0	0	1	NA	NA	NA	NA	4.27838	111741	597	3	0	0	1	0.0611541	2.17304	1.9407	0.0522948
1094	GREB1L	0.356383	3.16954	0.0384729	0.844497	0.917072	0.356435	3.16791	0.0383025	0.844837	1	1.44447	2.39278	5.29516	0.0213848	0.0352212	1.44434	2.39135	5.29417	0.021397	0.0609526	NA	NA	NA	NA	NA	NA	NA	NA	NA	NA	NA	NA	NA	NA	NA	NA	NA	NA	NA	NA	NA	NA	NA	NA	NA	NA	NA
1095	KCTD9	0.73716	6.45404	3.56249	0.0590989	0.183548	0.737249	6.45241	3.56749	0.0589215	0.29848	1.44447	7.25593	217.106	3.87e-49	9.37e-48	1.44433	7.25448	217.064	3.95138e-49	1.65635e-47	NA	NA	NA	NA	NA	NA	NA	NA	NA	NA	NA	NA	NA	NA	NA	NA	NA	NA	NA	NA	NA	NA	NA	NA	NA	NA	NA
1096	MRPL4	1.75882	6.12432	21.8783	2.9e-06	7.72e-05	1.75893	6.1227	21.915	2.85001e-06	0.000123911	1.44438	6.13991	99.5903	1.87e-23	2e-22	1.44424	6.13847	99.5711	1.8925e-23	3.49947e-22	-0.616053	0.255655	-0.414989	2	-0.109957	0.496813	-4.51824	2	0.0347653	0.309257	8.89558	4	-0.63656	1.23093	-1.93373	6	-0.0997788	1.00834e+06	311	3.6	1.01095	-10.1319	10	0.00108983	0.271436	-0.371611	0.710182
1097	NT5DC3	2.69291	6.44455	9.69507	0.00184763	0.0157575	2.69305	6.44292	9.67461	0.00186832	0.0260857	1.44432	5.66591	71.1144	3.37e-17	2.55e-16	1.44419	5.66446	71.1006	3.39463e-17	4.43874e-16	NA	NA	NA	NA	NA	NA	NA	NA	0.554856	0	0	1	NA	NA	NA	NA	0.554856	639730	548	3	0	0	1	0.0182003	1.93698	0.277059	0.781735
1098	MRPS22	1.67539	5.81918	17.2188	3.33e-05	0.000626374	1.6755	5.81755	17.1965	3.37059e-05	0.00103999	1.44348	5.71752	73.7147	9.03e-18	7.13e-17	1.44335	5.71608	73.7004	9.09204e-18	1.24317e-16	-2.74444	0	0	1	NA	NA	NA	NA	0.249907	0.94479	3.78056	8	-0.28709	0.929513	-3.2377	4	0.130373	475104	360	3.33333	1.14701	8.79789	12	-0.00676684	0.231982	0.591165	0.55441
1099	SCN9A	1.3465	2.18066	2.14143	0.143368	0.32481	1.34655	2.17902	2.12997	0.144444	0.526325	1.44285	2.23105	4.48517	0.0341902	0.0537414	1.44272	2.22962	4.48433	0.0342069	0.0929036	NA	NA	NA	NA	NA	NA	NA	NA	NA	NA	NA	NA	NA	NA	NA	NA	NA	NA	NA	NA	NA	NA	NA	NA	NA	NA	NA
1100	RBM34	1.24982	5.17765	11.3805	0.000742204	0.00787581	1.24991	5.17601	11.3106	0.000770653	0.0133143	1.44279	5.36632	57.248	3.84e-14	2.42e-13	1.44266	5.36488	57.237	3.86343e-14	4.21234e-13	NA	NA	NA	NA	NA	NA	NA	NA	-0.694481	1.83171	-2.63752	6	2.26163	2.67467	1.18263	2	-0.464301	485512	430	3.25	1.31499	-2.83219	8	0.00409807	0.301689	-1.55259	0.120521
1101	TFAM	1.73602	6.01944	13.1506	0.00028742	0.00365629	1.73612	6.01781	13.1463	0.000288094	0.00601424	1.44219	6.23714	106.366	6.13e-25	6.89e-24	1.44206	6.2357	106.345	6.19536e-25	1.20712e-23	-0.417253	0.537215	-1.28751	6	0.195697	0.652562	3.33456	6	0.222841	0.770425	3.45728	9	0.131465	1.33742	10.1732	4	0.222841	2.21863e+06	246	3.30769	0.770425	3.45728	13	-0.0147982	0.246888	0.962538	0.335779
1102	EFR3B	2.54238	2.42903	7.3758	0.00661076	0.0405247	2.54254	2.42739	7.33262	0.00677142	0.0676002	1.44079	2.56628	6.23259	0.012542	0.0217971	1.44066	2.56485	6.23141	0.0125504	0.0377444	NA	NA	NA	NA	NA	NA	NA	NA	NA	NA	NA	NA	NA	NA	NA	NA	NA	NA	NA	NA	NA	NA	NA	NA	NA	NA	NA
1103	INVS	1.67111	5.4331	14.3726	0.000149965	0.00218495	1.67121	5.43147	14.3107	0.000154978	0.00367666	1.44018	4.99856	43.7167	3.8e-11	1.93e-10	1.44005	4.99712	43.7082	3.81174e-11	3.3589e-10	NA	NA	NA	NA	NA	NA	NA	NA	NA	NA	NA	NA	NA	NA	NA	NA	NA	NA	NA	NA	NA	NA	NA	NA	NA	NA	NA
1104	DDX47	1.95884	6.57463	29.8536	4.66e-08	2.12e-06	1.95894	6.57301	29.9321	4.47437e-08	3.327e-06	1.43957	6.69872	146.547	9.86e-34	1.51e-32	1.43944	6.69727	146.518	1.00007e-33	2.64047e-32	NA	NA	NA	NA	NA	NA	NA	NA	1.13612	0.214374	0.188689	8	0.672866	0.295334	0.43892	8	0.986523	930952	455	3.5	0.477114	0.483632	16	-0.00826582	0.219174	4.53882	5.65704e-06
1105	FAM122C	1.01566	3.37452	3.4438	0.0634896	0.191227	1.01576	3.37288	3.41648	0.0645486	0.314785	1.43928	3.25729	11.4383	0.000719451	0.00159521	1.43915	3.25586	11.4361	0.0007203	0.00276441	NA	NA	NA	NA	NA	NA	NA	NA	NA	NA	NA	NA	NA	NA	NA	NA	NA	NA	NA	NA	NA	NA	NA	NA	NA	NA	NA
1106	CDO1	2.7246	2.31714	7.83243	0.00513171	0.0337245	2.7247	2.3155	7.80014	0.00522421	0.0559917	1.43878	1.61468	2.14134	0.143377	0.191932	1.43866	1.61326	2.14096	0.143412	0.327277	NA	NA	NA	NA	NA	NA	NA	NA	NA	NA	NA	NA	NA	NA	NA	NA	NA	NA	NA	NA	NA	NA	NA	NA	NA	NA	NA
1107	SRFBP1	2.0755	4.38359	19.7742	8.72e-06	0.000198383	2.07559	4.38196	19.7184	8.97329e-06	0.000333613	1.43864	4.0736	21.8758	2.91e-06	9.23e-06	1.43851	4.07217	21.8715	2.91528e-06	1.6014e-05	NA	NA	NA	NA	NA	NA	NA	NA	-0.742984	1.53581	-2.06709	4	NA	NA	NA	NA	-0.742984	412058	429	3	1.53581	-2.06709	4	-0.00336204	0.621497	-1.19007	0.23402
1108	SHOX2	1.1271	4.26805	1.13571	0.28656	0.499857	1.12717	4.26643	1.13199	0.287351	0.78908	1.43815	4.81857	38.2176	6.33e-10	2.92e-09	1.43802	4.81713	38.2102	6.352e-10	5.07653e-09	NA	NA	NA	NA	NA	NA	NA	NA	NA	NA	NA	NA	NA	NA	NA	NA	NA	NA	NA	NA	NA	NA	NA	NA	NA	NA	NA
1109	MED13	1.14729	7.60507	7.11476	0.00764516	0.0447133	1.1474	7.60343	7.12697	0.00759331	0.0733637	1.43788	7.12715	196.999	9.44e-45	2.04e-43	1.43774	7.1257	196.96	9.61992e-45	3.59559e-43	NA	NA	NA	NA	NA	NA	NA	NA	NA	NA	NA	NA	NA	NA	NA	NA	NA	NA	NA	NA	NA	NA	NA	NA	NA	NA	NA
1110	NDUFAF5	1.8806	3.94397	14.7817	0.000120703	0.00183712	1.88069	3.94234	14.6699	0.000128072	0.00315947	1.4376	3.89276	19.0017	1.31e-05	3.79e-05	1.43747	3.89133	18.9981	1.3085e-05	6.57783e-05	NA	NA	NA	NA	NA	NA	NA	NA	NA	NA	NA	NA	NA	NA	NA	NA	NA	NA	NA	NA	NA	NA	NA	NA	NA	NA	NA
1111	ARNTL	0.821257	4.56136	3.92051	0.0477005	0.159262	0.821355	4.55972	3.91083	0.047976	0.261168	1.43693	5.0115	43.9546	3.36e-11	1.72e-10	1.4368	5.01006	43.9461	3.37542e-11	2.98818e-10	NA	NA	NA	NA	NA	NA	NA	NA	NA	NA	NA	NA	NA	NA	NA	NA	NA	NA	NA	NA	NA	NA	NA	NA	NA	NA	NA
1112	MRPS30	1.17719	5.14637	8.36336	0.00382862	0.0273403	1.17727	5.14474	8.31928	0.00392266	0.0456047	1.43579	5.06712	45.704	1.38e-11	7.24e-11	1.43566	5.06568	45.6951	1.38167e-11	1.25918e-10	NA	NA	NA	NA	NA	NA	NA	NA	NA	NA	NA	NA	-0.489118	0.364733	-0.745696	2	-0.489118	306553	439	4	0.364733	-0.745696	2	-0.0167118	1.42843	-0.330718	0.740858
1113	ZNF136	1.28442	4.42079	8.42173	0.00370764	0.026696	1.28453	4.41916	8.40245	0.00374715	0.0440177	1.43544	4.29267	25.7441	3.9e-07	1.37e-06	1.43531	4.29124	25.7391	3.90831e-07	2.37147e-06	NA	NA	NA	NA	NA	NA	NA	NA	NA	NA	NA	NA	NA	NA	NA	NA	NA	NA	NA	NA	NA	NA	NA	NA	NA	NA	NA
1114	GPR125	1.53787	5.73921	5.97556	0.0145055	0.0700992	1.53799	5.73758	5.95633	0.0146645	0.115705	1.43326	6.2554	106.575	5.52e-25	6.23e-24	1.43312	6.25396	106.555	5.57353e-25	1.08899e-23	NA	NA	NA	NA	NA	NA	NA	NA	NA	NA	NA	NA	NA	NA	NA	NA	NA	NA	NA	NA	NA	NA	NA	NA	NA	NA	NA
1115	RANBP9	1.59723	6.874	20.2439	6.82e-06	0.000161164	1.59734	6.87238	20.304	6.60636e-06	0.00025744	1.43304	6.61811	137.43	9.71e-32	1.4e-30	1.4329	6.61667	137.403	9.84234e-32	2.46269e-30	NA	NA	NA	NA	NA	NA	NA	NA	-0.166627	0.753604	-4.52269	8	-0.384216	2.17731	-5.66691	5	-0.384216	277802	729	3.38462	0.757356	-1.97117	13	0.0171511	0.23354	-1.71862	0.0856829
1116	ARHGAP27	-0.0811718	2.57512	0.00803501	0.928575	0.963796	-0.0810723	2.57348	0.00792373	0.92907	1	1.43286	1.72776	2.4766	0.115552	0.158776	1.43274	1.72634	2.47615	0.115585	0.272003	NA	NA	NA	NA	NA	NA	NA	NA	NA	NA	NA	NA	NA	NA	NA	NA	NA	NA	NA	NA	NA	NA	NA	NA	NA	NA	NA
1117	ORC4	1.55729	5.55273	17.7301	2.55e-05	0.000499092	1.55739	5.5511	17.6627	2.63743e-05	0.000844741	1.43107	5.69144	71.2542	3.14e-17	2.38e-16	1.43094	5.68999	71.2402	3.1627e-17	4.14143e-16	NA	NA	NA	NA	NA	NA	NA	NA	NA	NA	NA	NA	NA	NA	NA	NA	NA	NA	NA	NA	NA	NA	NA	NA	NA	NA	NA
1118	SMN1	1.56036	6.19566	16.7564	4.25e-05	0.000767073	1.56046	6.19403	16.7837	4.18921e-05	0.00123811	1.42906	6.18525	100.908	9.64e-24	1.04e-22	1.42893	6.18381	100.888	9.73393e-24	1.8191e-22	-0.515647	0	0	1	NA	NA	NA	NA	0.169686	1.2397	7.30581	3	-1.25954	0.163722	-0.129985	2	-0.181086	568116	294	3.4	1.2655	-6.98842	5	-0.00983105	0.448988	-0.381424	0.702888
1119	SSX2IP	1.79003	5.05936	9.20918	0.00240804	0.0191501	1.79013	5.05772	9.16687	0.00246436	0.0319319	1.42878	4.96345	42.0139	9.06e-11	4.47e-10	1.42865	4.96202	42.0057	9.10078e-11	7.76908e-10	NA	NA	NA	NA	NA	NA	NA	NA	NA	NA	NA	NA	NA	NA	NA	NA	NA	NA	NA	NA	NA	NA	NA	NA	NA	NA	NA
1120	AL590867.1	1.3195	4.12991	8.76069	0.00307793	0.023324	1.31959	4.12828	8.70656	0.00317068	0.0391553	1.42863	4.11476	22.3034	2.33e-06	7.49e-06	1.42849	4.11333	22.2991	2.33318e-06	1.29955e-05	NA	NA	NA	NA	NA	NA	NA	NA	NA	NA	NA	NA	NA	NA	NA	NA	NA	NA	NA	NA	NA	NA	NA	NA	NA	NA	NA
1121	ZNF300	1.70319	4.41673	15.6905	7.46e-05	0.00122998	1.70329	4.41509	15.65	7.62112e-05	0.00206133	1.42678	3.47541	13.4711	0.000242266	0.000579903	1.42665	3.47398	13.4685	0.000242603	0.00100474	NA	NA	NA	NA	NA	NA	NA	NA	NA	NA	NA	NA	NA	NA	NA	NA	NA	NA	NA	NA	NA	NA	NA	NA	NA	NA	NA
1122	CWF19L2	1.21457	4.71011	10.2073	0.00139886	0.0127615	1.21466	4.70847	10.1782	0.0014211	0.0211937	1.42626	4.42219	28.0605	1.18e-07	4.34e-07	1.42612	4.42076	28.0551	1.17912e-07	7.53029e-07	NA	NA	NA	NA	NA	NA	NA	NA	NA	NA	NA	NA	NA	NA	NA	NA	NA	NA	NA	NA	NA	NA	NA	NA	NA	NA	NA
1123	FDX1	1.25699	4.76084	9.08694	0.00257441	0.020201	1.25709	4.7592	9.05903	0.002614	0.0334997	1.4262	4.94274	41.2489	1.34e-10	6.55e-10	1.42606	4.9413	41.2408	1.34582e-10	1.13781e-09	0.355589	0.208347	0.585922	2	0.181009	0.0443472	0.245	2	0.696165	0.371588	0.533764	4	0.165382	0.987031	5.96818	3	0.665955	1.04131e+06	184	3.42857	0.933042	1.40106	7	-0.00193579	0.352014	1.89734	0.0577829
1124	PDLIM1	0.382442	5.59437	0.753264	0.385445	0.593086	0.382534	5.59274	0.750704	0.386253	0.919657	1.4253	6.1633	98.8938	2.66e-23	2.82e-22	1.42517	6.16185	98.8744	2.69039e-23	4.93582e-22	0.285701	0.418589	1.46513	5	-0.0756553	0.478798	-6.32868	6	0.513915	1.0235	1.99158	31	0.00321361	1.54208	479.858	33	0.29589	456301	329	3.51562	1.41398	4.77874	64	-0.00407404	0.102511	2.92616	0.00343177
1125	ZDHHC14	2.06335	2.60438	5.05383	0.0245716	0.102535	2.06347	2.60274	5.00961	0.025207	0.17065	1.42472	2.62838	6.47769	0.0109237	0.0192348	1.42459	2.62695	6.47645	0.0109313	0.0333084	NA	NA	NA	NA	NA	NA	NA	NA	NA	NA	NA	NA	NA	NA	NA	NA	NA	NA	NA	NA	NA	NA	NA	NA	NA	NA	NA
1126	RBM39	1.37468	8.24016	11.3092	0.00077126	0.0081039	1.37477	8.23854	11.3363	0.000760069	0.0131747	1.42455	8.30535	419.584	3.01e-93	1.47e-91	1.42442	8.3039	419.301	3.46396e-93	2.9392e-91	NA	NA	NA	NA	NA	NA	NA	NA	NA	NA	NA	NA	NA	NA	NA	NA	NA	NA	NA	NA	NA	NA	NA	NA	NA	NA	NA
1127	SNRK	1.47777	5.74715	12.2981	0.000453423	0.00530616	1.47787	5.74552	12.2679	0.000460821	0.00883156	1.42451	5.38787	56.8521	4.7e-14	2.94e-13	1.42438	5.38643	56.8409	4.72531e-14	5.11404e-13	NA	NA	NA	NA	NA	NA	NA	NA	NA	NA	NA	NA	NA	NA	NA	NA	NA	NA	NA	NA	NA	NA	NA	NA	NA	NA	NA
1128	RASGRF2	1.56929	1.56884	1.2008	0.273161	0.484837	1.56923	1.5672	1.19017	0.275294	0.769632	1.42422	1.62321	2.12823	0.144608	0.193346	1.4241	1.62178	2.12785	0.144643	0.329515	NA	NA	NA	NA	NA	NA	NA	NA	-5.03666	0	0	1	NA	NA	NA	NA	-5.03666	518623	1237	3	0	0	1	0.0979187	1.9907	-2.57928	0.00990055
1129	NDUFAF7	1.53791	4.74666	12.8674	0.000334361	0.00411898	1.53801	4.74503	12.8334	0.000340489	0.00685183	1.42281	4.61076	32.165	1.42e-08	5.77e-08	1.42267	4.60933	32.1587	1.42081e-08	1.00195e-07	NA	NA	NA	NA	NA	NA	NA	NA	NA	NA	NA	NA	NA	NA	NA	NA	NA	NA	NA	NA	NA	NA	NA	NA	NA	NA	NA
1130	INPP5F	2.06487	5.85231	26.5912	2.51e-07	9.13e-06	2.06497	5.85069	26.5671	2.54546e-07	1.50461e-05	1.42272	5.91796	82.8655	8.78e-20	7.83e-19	1.42258	5.91652	82.8492	8.85581e-20	1.36723e-18	NA	NA	NA	NA	NA	NA	NA	NA	NA	NA	NA	NA	1.1974	1.27095	1.06142	2	1.1974	275174	1132	4	1.27095	1.06142	2	0.0758748	1.40943	0.79573	0.426189
1131	C7orf31	-0.785134	2.57926	1.20502	0.272322	0.48388	-0.78506	2.57761	1.19784	0.273755	0.766651	1.42188	1.78492	2.62894	0.104932	0.145749	1.42176	1.78349	2.62846	0.104964	0.249944	NA	NA	NA	NA	NA	NA	NA	NA	NA	NA	NA	NA	NA	NA	NA	NA	NA	NA	NA	NA	NA	NA	NA	NA	NA	NA	NA
1132	HMBOX1	1.08309	4.00424	4.2232	0.0398749	0.141354	1.0832	4.0026	4.20006	0.0404225	0.233428	1.42129	3.61381	14.9525	0.00011025	0.000279768	1.42116	3.61238	14.9496	0.00011042	0.000484784	NA	NA	NA	NA	NA	NA	NA	NA	NA	NA	NA	NA	NA	NA	NA	NA	NA	NA	NA	NA	NA	NA	NA	NA	NA	NA	NA
1133	ZNF675	1.91216	3.68631	13.3782	0.000254564	0.00332719	1.91224	3.68467	13.2579	0.000271436	0.00573476	1.42055	3.52302	13.8896	0.000193865	0.000472609	1.42042	3.52159	13.8869	0.000194144	0.000819039	NA	NA	NA	NA	NA	NA	NA	NA	NA	NA	NA	NA	NA	NA	NA	NA	NA	NA	NA	NA	NA	NA	NA	NA	NA	NA	NA
1134	C8orf76	1.14051	4.45194	7.38241	0.00658647	0.0404144	1.14061	4.4503	7.36781	0.00664016	0.066601	1.41935	4.75984	35.7582	2.23e-09	9.84e-09	1.41921	4.75841	35.7512	2.24197e-09	1.70872e-08	NA	NA	NA	NA	NA	NA	NA	NA	NA	NA	NA	NA	NA	NA	NA	NA	NA	NA	NA	NA	NA	NA	NA	NA	NA	NA	NA
1135	GADD45B	-0.0354952	6.93981	0.00275113	0.958169	0.978949	-0.0354378	6.93818	0.00273788	0.95827	1	1.41822	6.95548	170.689	5.23e-39	9.64e-38	1.41809	6.95403	170.655	5.32148e-39	1.6941e-37	NA	NA	NA	NA	5.33482	0	0	1	NA	NA	NA	NA	6.21051	0	0	1	6.21051	564805	176	4	0	0	1	0.249057	1.90316	3.1324	0.00173383
1136	KIDINS220	1.33597	7.58928	11.0747	0.000875116	0.00891827	1.33608	7.58765	11.1016	0.000862541	0.0144395	1.41634	7.18799	200.05	2.04e-45	4.53e-44	1.41621	7.18654	200.011	2.07718e-45	7.99089e-44	NA	NA	NA	NA	NA	NA	NA	NA	-1.27319	0	0	1	NA	NA	NA	NA	-1.27319	369267	1771	3	0	0	1	0.110684	2.10339	-0.657925	0.510586
1137	DLC1	1.63429	7.61198	16.8041	4.14e-05	0.000750707	1.63438	7.61035	16.8436	4.05897e-05	0.001203	1.41595	8.30005	376.013	9.18e-84	3.94e-82	1.41582	8.29861	374.549	1.91283e-83	1.42232e-81	NA	NA	NA	NA	NA	NA	NA	NA	NA	NA	NA	NA	NA	NA	NA	NA	NA	NA	NA	NA	NA	NA	NA	NA	NA	NA	NA
1138	CRABP2	0.542741	1.62635	0.175367	0.675385	0.816903	0.542849	1.6247	0.173617	0.676917	1	1.41399	1.94117	3.14665	0.0760831	0.109793	1.41386	1.93974	3.14606	0.0761105	0.188711	NA	NA	NA	NA	NA	NA	NA	NA	NA	NA	NA	NA	1.25343	0.604281	0.482101	2	1.25343	158588	138	4	0.604281	0.482101	2	0.0512559	1.34297	0.895159	0.370702
1139	SF3B4	1.66293	7.0006	22.156	2.51e-06	6.78e-05	1.66303	6.99897	22.2272	2.42218e-06	0.000107305	1.41296	7.01911	177.258	1.92e-40	3.69e-39	1.41283	7.01767	177.223	1.95824e-40	6.49956e-39	-0.0132979	0.757301	-56.9488	5	0.311645	1.81532	5.82496	4	-1.6189	2.0554	-1.26963	2	2.31079	4.57167	1.9784	4	0.262113	687807	424	3.66667	3.46444	13.2174	6	-0.00368603	0.387802	0.685398	0.493093
1140	FAM118A	0.815634	4.1267	3.79351	0.0514517	0.167694	0.815735	4.12506	3.77102	0.0521477	0.275576	1.4116	3.74729	16.4224	5.07e-05	0.000135513	1.41147	3.74586	16.4192	5.07682e-05	0.000234898	NA	NA	NA	NA	NA	NA	NA	NA	NA	NA	NA	NA	NA	NA	NA	NA	NA	NA	NA	NA	NA	NA	NA	NA	NA	NA	NA
1141	CCNT1	1.55229	6.90787	17.3384	3.13e-05	0.000592468	1.5524	6.90624	17.383	3.05545e-05	0.00095253	1.41098	6.77713	149.384	2.36e-34	3.71e-33	1.41084	6.77569	149.354	2.39927e-34	6.52298e-33	NA	NA	NA	NA	NA	NA	NA	NA	2.45209	0	0	1	3.15736	0	0	1	2.80472	68230.5	726	3.5	0.352634	0.125729	2	0.0795263	1.46167	1.86445	0.0622591
1142	SNRPB2	1.6573	6.39304	17.1447	3.46e-05	0.000649365	1.65741	6.39141	17.1706	3.41687e-05	0.00105273	1.41014	6.63404	135.054	3.21e-31	4.54e-30	1.41001	6.63259	135.027	3.25651e-31	7.96823e-30	0.14921	0.160794	1.07763	2	0.496244	0.280735	0.56572	4	0.425906	0.665411	1.56234	9	-0.06342	0.477891	-7.53534	9	0.247054	1.13938e+06	225	3.5	0.586314	2.37323	18	-0.0101949	0.195884	1.31327	0.189091
1143	EZH2	1.75298	5.25898	12.0814	0.000509285	0.00582733	1.75307	5.25735	12.0097	0.000529249	0.00988198	1.4083	5.76006	72.7357	1.48e-17	1.15e-16	1.40816	5.75862	72.7213	1.49317e-17	2.00644e-16	NA	NA	NA	NA	NA	NA	NA	NA	NA	NA	NA	NA	NA	NA	NA	NA	NA	NA	NA	NA	NA	NA	NA	NA	NA	NA	NA
1144	FBXL20	0.773857	5.20324	4.16042	0.0413792	0.145166	0.773946	5.20161	4.13705	0.0419542	0.239252	1.40829	5.09816	45.1794	1.8e-11	9.37e-11	1.40816	5.09672	45.1705	1.80608e-11	1.63113e-10	NA	NA	NA	NA	NA	NA	NA	NA	-0.553305	0	0	1	NA	NA	NA	NA	-0.553305	254939	438	3	0	0	1	0.0131077	2.04814	-0.276549	0.782126
1145	DDX24	1.15154	8.03979	8.99693	0.00270433	0.0209647	1.15163	8.03816	9.02452	0.00266382	0.033952	1.40695	8.02673	351.485	2.01e-78	8.15e-77	1.40682	8.02529	351.415	2.08438e-78	1.46206e-76	-0.225743	0.647944	-2.87028	3	0.813389	0	0	1	1.10826	0.857834	0.774037	17	1.97949	1.68612	0.851796	14	1.30898	357161	859	3.45161	1.60433	1.22563	31	-0.00471916	0.150506	8.72855	2.57966e-18
1146	APOE	1.65466	3.93548	5.40341	0.0200975	0.0889679	1.65475	3.93384	5.37116	0.0204723	0.147635	1.40688	3.05204	9.24034	0.00236741	0.00476421	1.40675	3.05061	9.23854	0.00236974	0.00825466	-15.9243	4.05359	-0.254554	3	-9.37287	8.08082	-0.86215	7	-6.87822	4.75017	-0.69061	26	6.07963	5.9951	0.986096	20	-4.39604	968614	317	3.43478	13.2451	-3.01296	46	-0.00143034	0.119595	-36.7457	1.3642e-295
1147	SRSF7	2.53987	7.35665	27.9783	1.23e-07	5.01e-06	2.53997	7.35503	28.0032	1.21117e-07	8.11678e-06	1.40684	7.5819	259.328	2.4e-58	7.04e-57	1.40671	7.58046	259.276	2.46749e-58	1.25116e-56	0.196927	0.712965	3.62045	7	0.964528	0.574308	0.595429	10	0.370681	0.712678	1.92262	21	-0.216091	1.30087	-6.02002	20	0.249931	833413	238	3.4878	0.971768	3.88814	41	0.00211535	0.132641	1.86832	0.0617182
1148	ZNF350	0.920008	4.14391	4.38654	0.0362238	0.132728	0.920099	4.14227	4.36123	0.0367658	0.218853	1.40543	3.81707	17.2118	3.34e-05	9.15e-05	1.4053	3.81564	17.2084	3.34955e-05	0.000158606	NA	NA	NA	NA	NA	NA	NA	NA	NA	NA	NA	NA	NA	NA	NA	NA	NA	NA	NA	NA	NA	NA	NA	NA	NA	NA	NA
1149	SESTD1	1.0125	5.62746	5.64141	0.0175411	0.0806784	1.0126	5.62582	5.62324	0.0177238	0.133153	1.40393	5.78077	73.4084	1.05e-17	8.28e-17	1.4038	5.77932	73.3938	1.06197e-17	1.44361e-16	NA	NA	NA	NA	NA	NA	NA	NA	NA	NA	NA	NA	NA	NA	NA	NA	NA	NA	NA	NA	NA	NA	NA	NA	NA	NA	NA
1150	TAPT1	1.66075	5.25477	17.9165	2.31e-05	0.000457394	1.66084	5.25314	17.7988	2.45535e-05	0.000790028	1.40377	5.15535	46.8305	7.74e-12	4.14e-11	1.40364	5.15391	46.8212	7.77659e-12	7.20259e-11	NA	NA	NA	NA	NA	NA	NA	NA	NA	NA	NA	NA	NA	NA	NA	NA	NA	NA	NA	NA	NA	NA	NA	NA	NA	NA	NA
1151	GLUL	-0.0348397	9.44497	0.0026786	0.958724	0.979127	-0.0347016	9.4433	0.002655	0.958906	1	1.40276	8.96156	604.884	1.45e-133	1.19e-131	1.40262	8.96011	606.469	6.55717e-134	9.38656e-132	-1.0079	0.741274	-0.735468	4	-0.967234	0.211264	-0.218421	9	1.44918	0.83374	0.575318	5	2.72154	8.55806	3.14456	10	2.1258	519848	373	3.66667	5.35888	2.52087	15	-0.00936559	0.219098	9.74528	1.9325e-22
1152	CCDC12	1.13394	4.56827	8.4256	0.00369974	0.0266568	1.13404	4.56663	8.40646	0.00373889	0.0439785	1.39581	4.88519	38.0713	6.82e-10	3.14e-09	1.39567	4.88375	38.0638	6.84703e-10	5.45765e-09	-0.696906	0	0	1	NA	NA	NA	NA	0.186206	0	0	1	1.29216	3.08944	2.39091	2	0.186206	799631	179	3.66667	3.08944	16.5915	3	0.0208079	0.722826	0.228822	0.819008
1153	H3F3A	1.63733	6.76644	13.0701	0.000300044	0.00377211	1.63745	6.76481	13.0802	0.00029843	0.00618632	1.39558	7.54168	248.712	4.96e-56	1.4e-54	1.39545	7.54023	248.663	5.0818e-56	2.47538e-54	NA	NA	NA	NA	NA	NA	NA	NA	NA	NA	NA	NA	7.81121	0	0	1	7.81121	955765	136	4	0	0	1	0.166235	2.01023	3.80304	0.000142933
1154	RLIM	1.18824	7.28609	10.0321	0.00153837	0.013797	1.18835	7.28446	10.0607	0.00151463	0.0223196	1.39459	7.05853	177.952	1.36e-40	2.61e-39	1.39445	7.05709	177.916	1.38154e-40	4.59268e-39	NA	NA	NA	NA	NA	NA	NA	NA	NA	NA	NA	NA	NA	NA	NA	NA	NA	NA	NA	NA	NA	NA	NA	NA	NA	NA	NA
1155	ZBTB11	1.4936	6.20918	15.0081	0.000107052	0.00167901	1.49371	6.20755	15.0332	0.000105635	0.00271745	1.39168	6.215	98.3108	3.58e-23	3.77e-22	1.39155	6.21356	98.2912	3.61176e-23	6.59171e-22	NA	NA	NA	NA	NA	NA	NA	NA	NA	NA	NA	NA	NA	NA	NA	NA	NA	NA	NA	NA	NA	NA	NA	NA	NA	NA	NA
1156	GPBP1	1.08899	6.85142	8.28007	0.00400826	0.0283867	1.0891	6.84978	8.29845	0.00396789	0.0460796	1.39122	6.83404	151.581	7.82e-35	1.25e-33	1.39108	6.83259	151.551	7.94339e-35	2.18786e-33	NA	NA	NA	NA	NA	NA	NA	NA	NA	NA	NA	NA	NA	NA	NA	NA	NA	NA	NA	NA	NA	NA	NA	NA	NA	NA	NA
1157	UTP20	2.24679	6.44918	16.0196	6.27e-05	0.0010537	2.2469	6.44756	16.0116	6.29542e-05	0.00173169	1.38805	6.26451	101.332	7.78e-24	8.43e-23	1.38792	6.26307	101.311	7.86087e-24	1.4743e-22	0.252607	1.08518	4.29591	3	-0.70151	0.44471	-0.633932	3	0.816671	1.12415	1.37651	8	1.71878	1.67527	0.974684	10	1.21808	695282	2785	3.55556	1.62771	1.33629	18	0.00555579	0.184085	6.58674	4.49591e-11
1158	C12orf45	0.552629	3.30639	0.74534	0.387956	0.595612	0.552701	3.30475	0.740528	0.389492	0.923086	1.38687	2.99377	8.56796	0.0034213	0.00665268	1.38674	2.99234	8.56627	0.00342448	0.0115261	NA	NA	NA	NA	NA	NA	NA	NA	NA	NA	NA	NA	NA	NA	NA	NA	NA	NA	NA	NA	NA	NA	NA	NA	NA	NA	NA
1159	OSBPL6	1.26846	4.80357	3.95414	0.0467563	0.157047	1.26857	4.80193	3.94075	0.0471298	0.257813	1.38465	5.02851	41.6769	1.08e-10	5.29e-10	1.38451	5.02707	41.6685	1.08135e-10	9.19761e-10	NA	NA	NA	NA	NA	NA	NA	NA	NA	NA	NA	NA	NA	NA	NA	NA	NA	NA	NA	NA	NA	NA	NA	NA	NA	NA	NA
1160	ABHD13	1.30014	4.38982	9.92399	0.00163138	0.0143609	1.30023	4.38819	9.89757	0.00165497	0.0238368	1.37885	4.34201	24.8858	6.08e-07	2.09e-06	1.37872	4.34058	24.8808	6.09866e-07	3.62218e-06	NA	NA	NA	NA	NA	NA	NA	NA	NA	NA	NA	NA	NA	NA	NA	NA	NA	NA	NA	NA	NA	NA	NA	NA	NA	NA	NA
1161	TOM1L1	1.33198	4.92607	10.7207	0.00105945	0.0103459	1.33207	4.92444	10.6835	0.00108098	0.0172718	1.37883	4.43697	26.7239	2.35e-07	8.39e-07	1.3787	4.43553	26.7185	2.35358e-07	1.45494e-06	NA	NA	NA	NA	NA	NA	NA	NA	NA	NA	NA	NA	NA	NA	NA	NA	NA	NA	NA	NA	NA	NA	NA	NA	NA	NA	NA
1162	SLC25A26	1.37499	4.65898	12.2687	0.000460614	0.00538052	1.37509	4.65734	12.2363	0.000468695	0.008958	1.37752	4.58931	29.8925	4.57e-08	1.76e-07	1.37738	4.58788	29.8865	4.58103e-08	3.06222e-07	NA	NA	NA	NA	NA	NA	NA	NA	NA	NA	NA	NA	NA	NA	NA	NA	NA	NA	NA	NA	NA	NA	NA	NA	NA	NA	NA
1163	BRPF3	1.33634	6.30935	14.3663	0.00015047	0.00218495	1.33644	6.30772	14.4011	0.000147716	0.0035403	1.37583	6.17365	93.5651	3.93e-22	4e-21	1.3757	6.1722	93.5462	3.96831e-22	6.98787e-21	NA	NA	NA	NA	NA	NA	NA	NA	NA	NA	NA	NA	NA	NA	NA	NA	NA	NA	NA	NA	NA	NA	NA	NA	NA	NA	NA
1164	PIP5K1A	0.889652	7.06866	6.08249	0.0136528	0.0670955	0.889743	7.06703	6.09936	0.0135231	0.109392	1.37558	7.33912	210.855	8.94e-48	2.11e-46	1.37545	7.33768	210.813	9.13179e-48	3.72404e-46	NA	NA	NA	NA	NA	NA	NA	NA	NA	NA	NA	NA	NA	NA	NA	NA	NA	NA	NA	NA	NA	NA	NA	NA	NA	NA	NA
1165	UAP1L1	-0.774228	5.3037	2.5366	0.111234	0.276182	-0.77414	5.30206	2.52326	0.112178	0.449895	1.37371	4.78509	34.3816	4.53e-09	1.94e-08	1.37357	4.78366	34.3747	4.54606e-09	3.37078e-08	NA	NA	NA	NA	NA	NA	NA	NA	NA	NA	NA	NA	NA	NA	NA	NA	NA	NA	NA	NA	NA	NA	NA	NA	NA	NA	NA
1166	SFPQ	2.20313	8.49067	22.3901	2.23e-06	6.11e-05	2.20324	8.48905	22.4269	2.18294e-06	9.85741e-05	1.3733	8.57311	472.655	8.47e-105	4.66e-103	1.37316	8.57166	473.284	6.18375e-105	5.91475e-103	0.286913	0.61202	2.13312	55	0.370748	0.364186	0.9823	64	0.391816	0.678171	1.73084	133	-0.0459595	0.762849	-16.5983	115	0.193426	1.36595e+06	707	3.46371	0.790494	4.08679	248	-0.00248894	0.051824	3.7804	0.000156579
1167	EXPH5	-0.0284734	2.38571	0.00104511	0.97421	0.986328	-0.028445	2.38407	0.00102983	0.9744	1	1.37237	3.27934	10.7095	0.00106589	0.0022862	1.37224	3.27791	10.7073	0.00106713	0.00396182	NA	NA	NA	NA	NA	NA	NA	NA	NA	NA	NA	NA	NA	NA	NA	NA	NA	NA	NA	NA	NA	NA	NA	NA	NA	NA	NA
1168	LRRC1	0.892309	3.56733	2.51255	0.112943	0.278536	0.892344	3.56568	2.49199	0.114427	0.454109	1.37082	3.73105	15.3924	8.73e-05	0.000225396	1.37068	3.72962	15.3893	8.74832e-05	0.000390602	NA	NA	NA	NA	NA	NA	NA	NA	NA	NA	NA	NA	NA	NA	NA	NA	NA	NA	NA	NA	NA	NA	NA	NA	NA	NA	NA
1169	DHRS2	1.93313	1.74549	2.27271	0.131669	0.308115	1.93335	1.74385	2.25929	0.132815	0.500071	1.3702	2.37087	4.71937	0.0298247	0.0475435	1.37007	2.36945	4.71844	0.0298408	0.0822223	NA	NA	NA	NA	NA	NA	NA	NA	NA	NA	NA	NA	NA	NA	NA	NA	NA	NA	NA	NA	NA	NA	NA	NA	NA	NA	NA
1170	NUP153	1.37097	7.00198	10.207	0.00139909	0.0127615	1.37108	7.00035	10.2193	0.00138976	0.0208148	1.36953	7.23361	194.488	3.33e-44	7.06e-43	1.3694	7.23216	194.448	3.39979e-44	1.2442e-42	0.0220646	0.998461	45.2517	5	NA	NA	NA	NA	-0.698367	2.45599	-3.51675	14	-0.024021	0.900232	-37.4768	10	-0.283581	329730	1475	3.41667	1.32581	-4.67525	24	0.000450008	0.166764	-1.7032	0.0885311
1171	OTOGL	NA	NA	NA	NA	NA	0.229814	1.31707	0.0194821	0.888993	1	1.36888	1.50695	1.67534	0.195545	0.250696	1.36876	1.50553	1.67503	0.195586	0.423907	NA	NA	NA	NA	NA	NA	NA	NA	NA	NA	NA	NA	NA	NA	NA	NA	NA	NA	NA	NA	NA	NA	NA	NA	NA	NA	NA
1172	BNIP2	1.20598	6.61844	9.9541	0.00160492	0.0141667	1.20608	6.6168	9.97164	0.0015897	0.0231822	1.36638	6.78348	141.722	1.12e-32	1.67e-31	1.36625	6.78204	141.694	1.13475e-32	2.92628e-31	NA	NA	NA	NA	NA	NA	NA	NA	NA	NA	NA	NA	-0.243999	0	0	1	-0.243999	164945	435	4	0	0	1	0.147198	2.02114	-0.193552	0.846526
1173	LRP12	2.21129	7.14367	31.9122	1.61e-08	8.33e-07	2.21139	7.14205	31.9868	1.5522e-08	1.31705e-06	1.36501	7.15601	183.238	9.52e-42	1.88e-40	1.36488	7.15457	183.2	9.69834e-42	3.31841e-40	NA	NA	NA	NA	NA	NA	NA	NA	NA	NA	NA	NA	NA	NA	NA	NA	NA	NA	NA	NA	NA	NA	NA	NA	NA	NA	NA
1174	TSPYL2	-0.151197	5.54401	0.0495009	0.823934	0.904534	-0.151128	5.54238	0.0492706	0.824337	1	1.36465	5.60417	61.5348	4.35e-15	2.91e-14	1.36452	5.60273	61.5222	4.37778e-15	5.06998e-14	NA	NA	NA	NA	NA	NA	NA	NA	NA	NA	NA	NA	NA	NA	NA	NA	NA	NA	NA	NA	NA	NA	NA	NA	NA	NA	NA
1175	NIPBL	1.35106	7.32261	10.6104	0.00112452	0.0108017	1.35117	7.32098	10.6306	0.0011123	0.0175949	1.36382	6.84564	147.486	6.14e-34	9.49e-33	1.36368	6.84419	147.456	6.23764e-34	1.66784e-32	NA	NA	NA	NA	NA	NA	NA	NA	0.125706	0.565194	4.49616	3	1.35129	1.52143	1.12591	2	0.125706	213715	2804	3.4	1.01629	8.08469	5	0.0144217	0.479089	0.232283	0.816318
1176	WDPCP	1.25486	4.27438	7.41283	0.00647603	0.0399272	1.25497	4.27274	7.38623	0.00657252	0.06608	1.36335	4.30955	23.7985	1.07e-06	3.57e-06	1.36322	4.30812	23.7937	1.07233e-06	6.19921e-06	NA	NA	NA	NA	NA	NA	NA	NA	NA	NA	NA	NA	NA	NA	NA	NA	NA	NA	NA	NA	NA	NA	NA	NA	NA	NA	NA
1177	LCOR	1.10434	6.07206	10.746	0.00104505	0.0102521	1.10444	6.07043	10.7753	0.00102865	0.0166124	1.36175	5.70751	65.9953	4.52e-16	3.2e-15	1.36162	5.70607	65.9818	4.55114e-16	5.58423e-15	NA	NA	NA	NA	NA	NA	NA	NA	NA	NA	NA	NA	NA	NA	NA	NA	NA	NA	NA	NA	NA	NA	NA	NA	NA	NA	NA
1178	AAR2	1.41045	6.21001	16.3258	5.33e-05	0.000920705	1.41055	6.20838	16.3686	5.21409e-05	0.00148874	1.36002	6.23336	95.5967	1.41e-22	1.46e-21	1.35989	6.23192	95.5771	1.42242e-22	2.55175e-21	NA	NA	NA	NA	NA	NA	NA	NA	-0.606486	0	0	1	2.55081	0	0	1	0.972161	84697.1	398	3.5	1.57865	1.62385	2	0.0768248	1.55026	0.577541	0.563574
1179	TRIM24	1.19208	4.82812	5.6077	0.0178817	0.0816374	1.19218	4.82648	5.58945	0.018069	0.134641	1.35955	5.24341	47.1537	6.56e-12	3.52e-11	1.35941	5.24197	47.144	6.59569e-12	6.13044e-11	NA	NA	NA	NA	NA	NA	NA	NA	NA	NA	NA	NA	NA	NA	NA	NA	NA	NA	NA	NA	NA	NA	NA	NA	NA	NA	NA
1180	PTRH2	1.70338	4.4234	16.2533	5.54e-05	0.000947718	1.70348	4.42177	16.2158	5.652e-05	0.00158158	1.35903	4.74478	32.7423	1.05e-08	4.35e-08	1.3589	4.74334	32.7356	1.05587e-08	7.55224e-08	-0.458056	0.3027	-0.660837	4	0.326555	0.445876	1.36539	4	-0.171086	1.16263	-6.79562	6	0.515286	0.599018	1.1625	7	0.279159	233657	180	3.53846	1.00341	3.59441	13	-0.0123154	0.240667	1.21111	0.225853
1181	TPMT	1.48211	4.78565	11.0723	0.000876261	0.00892288	1.48221	4.78402	11.0449	0.000889295	0.0148049	1.35897	4.74359	32.7083	1.07e-08	4.42e-08	1.35883	4.74216	32.7016	1.07448e-08	7.67487e-08	NA	NA	NA	NA	NA	NA	NA	NA	0.380042	0.18516	0.487208	2	NA	NA	NA	NA	0.380042	1.06144e+06	245	3	0.18516	0.487208	2	0.105184	1.48871	0.184628	0.853521
1182	GTF2A2	1.52509	5.64933	18.2747	1.91e-05	0.000387881	1.52519	5.6477	18.2192	1.96885e-05	0.000650399	1.35847	5.98424	79.995	3.75e-19	3.23e-18	1.35834	5.9828	79.9786	3.78483e-19	5.64052e-18	0.294566	0	0	1	0.911737	0.179556	0.196939	2	-0.0380064	0.456673	-12.0157	2	-0.257319	0.312542	-1.21461	2	-0.219728	967772	109	3.5	0.65956	-3.00171	4	0.0212127	0.576281	-0.418096	0.675877
1183	GFM1	1.84608	6.11266	26.4207	2.75e-07	9.76e-06	1.84618	6.11103	26.482	2.66001e-07	1.56791e-05	1.35646	6.16969	90.9666	1.46e-21	1.44e-20	1.35633	6.16824	90.948	1.47501e-21	2.52142e-20	-0.376285	0	0	1	NA	NA	NA	NA	0.456267	0.397804	0.871866	12	-0.092774	0.914986	-9.86253	8	0.354322	271519	770	3.4	0.686846	1.93848	20	0.00347224	0.180797	1.94057	0.0523108
1184	WTAP	0.347149	7.63706	0.754066	0.385192	0.593004	0.347263	7.63541	0.756151	0.384536	0.918122	1.35447	7.22969	190.159	2.93e-43	6.08e-42	1.35434	7.22824	190.12	2.99286e-43	1.07289e-41	NA	NA	NA	NA	NA	NA	NA	NA	-1.49576	0	0	1	3.05056	0	0	1	0.777399	63250.8	396	3.5	2.27316	2.92406	2	0.0934735	1.40508	0.486751	0.626435
1185	MAP1LC3B	0.71341	7.48288	4.00686	0.0453153	0.153733	0.713504	7.48125	4.02076	0.0449434	0.249969	1.35434	7.81868	285.002	6.11e-64	1.95e-62	1.3542	7.81723	284.943	6.28745e-64	3.47262e-62	NA	NA	NA	NA	NA	NA	NA	NA	NA	NA	NA	NA	NA	NA	NA	NA	NA	NA	NA	NA	NA	NA	NA	NA	NA	NA	NA
1186	C6orf211	2.06204	5.70774	29.7206	4.99e-08	2.24e-06	2.06214	5.70611	29.6482	5.18e-08	3.77172e-06	1.35332	5.86844	73.1894	1.18e-17	9.19e-17	1.35319	5.867	73.1744	1.18686e-17	1.60406e-16	NA	NA	NA	NA	1.27687	0	0	1	-5.01273	3.63575	-0.725304	3	1.28346	2.15158	1.67638	5	0.787391	370593	441	3.625	3.0996	3.93654	8	-0.0211127	0.306219	2.64028	0.00828373
1187	CXorf40B	1.12535	5.69864	3.64708	0.0561678	0.17727	1.12545	5.697	3.63659	0.0565226	0.290524	1.35181	6.35014	102.657	3.99e-24	4.35e-23	1.35167	6.3487	102.636	4.02835e-24	7.60257e-23	NA	NA	NA	NA	NA	NA	NA	NA	NA	NA	NA	NA	NA	NA	NA	NA	NA	NA	NA	NA	NA	NA	NA	NA	NA	NA	NA
1188	NRIP1	0.687248	6.32038	0.926749	0.335709	0.547844	0.687378	6.31873	0.925603	0.336008	0.855903	1.35138	5.96003	77.9038	1.08e-18	9.01e-18	1.35125	5.95859	77.8878	1.09065e-18	1.57143e-17	NA	NA	NA	NA	NA	NA	NA	NA	NA	NA	NA	NA	NA	NA	NA	NA	NA	NA	NA	NA	NA	NA	NA	NA	NA	NA	NA
1189	TRAPPC8	0.808522	6.13885	4.86354	0.0274299	0.110105	0.808626	6.13721	4.87257	0.0272868	0.179297	1.35122	6.15059	89.1298	3.7e-21	3.54e-20	1.35109	6.14914	89.1115	3.73176e-21	6.18327e-20	NA	NA	NA	NA	NA	NA	NA	NA	NA	NA	NA	NA	5.11888	0	0	1	5.11888	199679	1435	4	0	0	1	0.111317	2.12558	2.35585	0.0184802
1190	AKIRIN1	1.17404	6.48541	11.0337	0.000894724	0.00906781	1.17413	6.48378	11.0587	0.000882703	0.0147333	1.35091	6.59087	121.394	3.13e-28	4.05e-27	1.35078	6.58943	121.369	3.1733e-28	7.09625e-27	NA	NA	NA	NA	NA	NA	NA	NA	NA	NA	NA	NA	NA	NA	NA	NA	NA	NA	NA	NA	NA	NA	NA	NA	NA	NA	NA
1191	KLHL25	-0.195837	4.25634	0.0531064	0.817743	0.900968	-0.195704	4.25468	0.0528449	0.818185	1	1.35019	3.91795	17.3392	3.13e-05	8.61e-05	1.35006	3.91652	17.3357	3.13254e-05	0.000149373	NA	NA	NA	NA	NA	NA	NA	NA	NA	NA	NA	NA	NA	NA	NA	NA	NA	NA	NA	NA	NA	NA	NA	NA	NA	NA	NA
1192	ZNF28	1.2166	4.93474	10.7076	0.00106695	0.0103876	1.21669	4.93311	10.6631	0.00109296	0.0173984	1.3488	4.81382	33.9896	5.54e-09	2.35e-08	1.34867	4.81238	33.9827	5.56057e-09	4.08415e-08	NA	NA	NA	NA	NA	NA	NA	NA	NA	NA	NA	NA	NA	NA	NA	NA	NA	NA	NA	NA	NA	NA	NA	NA	NA	NA	NA
1193	GLA	0.925682	4.07234	4.27065	0.0387761	0.13872	0.925769	4.0707	4.24117	0.039455	0.229225	1.34763	4.9423	37.2928	1.02e-09	4.59e-09	1.3475	4.94086	37.2851	1.02062e-09	7.97804e-09	NA	NA	NA	NA	NA	NA	NA	NA	-0.0978909	0.425794	-4.34968	2	1.64688	0	0	1	0.327903	523334	429	3.33333	1.08528	3.30977	3	0.02707	0.688793	0.436754	0.66229
1194	PDZD8	1.41783	6.64295	7.96917	0.00475807	0.0319883	1.41795	6.64131	7.9689	0.00475879	0.0524139	1.34695	6.35406	102.276	4.83e-24	5.25e-23	1.34682	6.35262	102.255	4.88231e-24	9.18949e-23	NA	NA	NA	NA	NA	NA	NA	NA	6.01583	0	0	1	NA	NA	NA	NA	6.01583	380462	1154	3	0	0	1	0.166115	1.97012	2.96922	0.0029856
1195	DDX52	1.32835	6.04553	14.5325	0.000137764	0.00204122	1.32846	6.0439	14.5638	0.000135492	0.00330379	1.34569	5.99206	79.0878	5.94e-19	5.03e-18	1.34555	5.99062	79.0715	5.99026e-19	8.77807e-18	NA	NA	NA	NA	NA	NA	NA	NA	NA	NA	NA	NA	NA	NA	NA	NA	NA	NA	NA	NA	NA	NA	NA	NA	NA	NA	NA
1196	ZHX1	1.48947	6.51349	18.2308	1.96e-05	0.000394474	1.48958	6.51186	18.2812	1.90581e-05	0.000635563	1.34214	5.99941	79.1312	5.81e-19	4.93e-18	1.342	5.99797	79.1148	5.86028e-19	8.60556e-18	NA	NA	NA	NA	NA	NA	NA	NA	NA	NA	NA	NA	NA	NA	NA	NA	NA	NA	NA	NA	NA	NA	NA	NA	NA	NA	NA
1197	KIAA0907	0.928439	6.20892	5.98646	0.0144161	0.0698064	0.928525	6.20729	5.99496	0.0143468	0.113968	1.34181	6.35412	101.587	6.84e-24	7.42e-23	1.34168	6.35267	101.566	6.91226e-24	1.2987e-22	NA	NA	NA	NA	NA	NA	NA	NA	NA	NA	NA	NA	NA	NA	NA	NA	NA	NA	NA	NA	NA	NA	NA	NA	NA	NA	NA
1198	RB1CC1	1.28248	7.37921	9.45872	0.00210148	0.0172477	1.28259	7.37758	9.47609	0.00208168	0.028116	1.34033	7.1842	180.818	3.21e-41	6.28e-40	1.3402	7.18275	180.78	3.27434e-41	1.10775e-39	NA	NA	NA	NA	NA	NA	NA	NA	NA	NA	NA	NA	NA	NA	NA	NA	NA	NA	NA	NA	NA	NA	NA	NA	NA	NA	NA
1199	TAF7	1.52888	7.0403	18.4981	1.7e-05	0.000351658	1.52898	7.03868	18.5556	1.65023e-05	0.000559737	1.33993	7.23051	186.617	1.74e-42	3.51e-41	1.3398	7.22906	186.578	1.77504e-42	6.19437e-41	NA	NA	NA	NA	NA	NA	NA	NA	1.2366	0.150211	0.121471	2	4.32206	1.38815	0.321177	3	1.76832	410959	349	3.6	2.93525	1.65991	5	-0.0109532	0.468812	3.79528	0.000147479
1200	CRISPLD2	-1.97229	6.86595	2.74184	0.0977521	0.254083	-1.97214	6.86424	2.73549	0.0981414	0.413286	1.33931	2.95021	7.75303	0.00536225	0.0100833	1.33918	2.94878	7.75145	0.00536694	0.0174662	NA	NA	NA	NA	NA	NA	NA	NA	NA	NA	NA	NA	NA	NA	NA	NA	NA	NA	NA	NA	NA	NA	NA	NA	NA	NA	NA
1201	CCDC84	0.81567	3.26845	1.62375	0.20257	0.402978	0.815755	3.26681	1.61395	0.203937	0.645622	1.33783	3.42035	11.4909	0.000699359	0.00155378	1.3377	3.41892	11.4886	0.000700248	0.00269286	NA	NA	NA	NA	NA	NA	NA	NA	NA	NA	NA	NA	NA	NA	NA	NA	NA	NA	NA	NA	NA	NA	NA	NA	NA	NA	NA
1202	CEP95	1.16658	5.12833	8.04413	0.00456513	0.0310646	1.16667	5.12669	8.0033	0.00466922	0.0518075	1.33706	4.75263	31.9862	1.55e-08	6.31e-08	1.33692	4.75119	31.9795	1.55806e-08	1.09507e-07	NA	NA	NA	NA	NA	NA	NA	NA	NA	NA	NA	NA	NA	NA	NA	NA	NA	NA	NA	NA	NA	NA	NA	NA	NA	NA	NA
1203	DNAJB9	0.659647	5.20128	3.50424	0.061212	0.186817	0.659739	5.19965	3.48262	0.0620164	0.306412	1.33662	6.12597	85.9008	1.89e-20	1.74e-19	1.33649	6.12453	85.883	1.90905e-20	3.04795e-19	NA	NA	NA	NA	NA	NA	NA	NA	3.14042	0.511566	0.162897	2	NA	NA	NA	NA	3.14042	100751	223	3	0.511566	0.162897	2	0.0670018	1.48516	2.06942	0.0385071
1204	SLC9A3	0.193377	1.88299	0.0327998	0.856283	0.923107	0.19365	1.88135	0.0326248	0.856663	1	1.33432	1.51001	1.6076	0.204829	0.260975	1.3342	1.50859	1.6073	0.204871	0.440854	NA	NA	NA	NA	NA	NA	NA	NA	NA	NA	NA	NA	NA	NA	NA	NA	NA	NA	NA	NA	NA	NA	NA	NA	NA	NA	NA
1205	CHST7	0.72138	4.83999	1.40944	0.235149	0.441652	0.721496	4.83835	1.40539	0.235823	0.703011	1.33428	4.65175	29.5768	5.37e-08	2.06e-07	1.33415	4.65031	29.5707	5.39147e-08	3.58234e-07	NA	NA	NA	NA	NA	NA	NA	NA	NA	NA	NA	NA	NA	NA	NA	NA	NA	NA	NA	NA	NA	NA	NA	NA	NA	NA	NA
1206	PLSCR4	1.87503	5.08658	20.3774	6.36e-06	0.000152831	1.87512	5.08495	20.2817	6.68371e-06	0.000259493	1.33334	5.19328	43.9116	3.44e-11	1.76e-10	1.3332	5.19185	43.9025	3.45153e-11	3.05299e-10	NA	NA	NA	NA	NA	NA	NA	NA	NA	NA	NA	NA	NA	NA	NA	NA	NA	NA	NA	NA	NA	NA	NA	NA	NA	NA	NA
1207	ZNF582	-0.0381791	2.19172	0.00196452	0.964647	0.982165	-0.0380873	2.19008	0.0019443	0.964829	1	1.33109	2.25856	3.99965	0.0455097	0.069346	1.33096	2.25714	3.99885	0.0455314	0.119569	NA	NA	NA	NA	NA	NA	NA	NA	NA	NA	NA	NA	NA	NA	NA	NA	NA	NA	NA	NA	NA	NA	NA	NA	NA	NA	NA
1208	PANX1	0.166922	6.31894	0.255003	0.613574	0.774328	0.167016	6.3173	0.255992	0.612887	1	1.32663	5.98694	76.8222	1.87e-18	1.53e-17	1.3265	5.9855	76.8062	1.88589e-18	2.67238e-17	NA	NA	NA	NA	NA	NA	NA	NA	NA	NA	NA	NA	NA	NA	NA	NA	NA	NA	NA	NA	NA	NA	NA	NA	NA	NA	NA
1209	OVGP1	0.851186	1.65233	0.4351	0.509497	0.698179	0.851264	1.65069	0.430525	0.511731	1	1.32531	1.84878	2.51079	0.11307	0.155806	1.32519	1.84736	2.51029	0.113105	0.266977	NA	NA	NA	NA	NA	NA	NA	NA	NA	NA	NA	NA	NA	NA	NA	NA	NA	NA	NA	NA	NA	NA	NA	NA	NA	NA	NA
1210	EIF2AK3	0.569061	4.53536	1.91308	0.166622	0.357333	0.569155	4.53372	1.90916	0.167056	0.574593	1.32507	5.24099	44.9523	2.02e-11	1.05e-10	1.32494	5.23955	44.9429	2.02868e-11	1.82825e-10	NA	NA	NA	NA	NA	NA	NA	NA	NA	NA	NA	NA	NA	NA	NA	NA	NA	NA	NA	NA	NA	NA	NA	NA	NA	NA	NA
1211	API5	1.62104	7.54911	11.9548	0.000545062	0.00617081	1.62115	7.54748	11.9663	0.000541705	0.0100699	1.3249	7.57055	231.148	3.35e-52	8.57e-51	1.32477	7.5691	231.1	3.43166e-52	1.52026e-50	0.739029	0.483474	0.654201	7	0.667649	0.480283	0.719364	6	0.634582	0.662943	1.04469	33	0.176948	1.30683	7.38539	34	0.508915	812522	514.149	3.50746	1.0582	2.07933	67	-0.00124401	0.0946805	5.38821	7.11617e-08
1212	AHCYL2	0.845337	4.74515	4.31028	0.0378827	0.136398	0.84543	4.74351	4.29821	0.0381525	0.224195	1.32469	4.62441	28.6145	8.83e-08	3.31e-07	1.32456	4.62297	28.6086	8.85896e-08	5.73773e-07	0.537225	0	0	1	NA	NA	NA	NA	NA	NA	NA	NA	NA	NA	NA	NA	NA	NA	NA	NA	NA	NA	NA	NA	NA	NA	NA
1213	ZRANB1	0.289763	5.85664	0.612786	0.433741	0.63517	0.28987	5.855	0.61274	0.433758	0.974647	1.32386	5.71596	63.1182	1.95e-15	1.33e-14	1.32372	5.71452	63.105	1.95977e-15	2.32073e-14	NA	NA	NA	NA	NA	NA	NA	NA	-0.16336	0	0	1	NA	NA	NA	NA	-0.16336	7.01292e+06	708	3	0	0	1	0.0941563	2.02126	-0.127404	0.898621
1214	HCCS	1.30583	5.42693	11.9435	0.000548394	0.00620307	1.30592	5.4253	11.8848	0.000565925	0.0103916	1.32359	5.46587	52.7599	3.77e-13	2.22e-12	1.32345	5.46443	52.7488	3.79051e-13	3.86265e-12	NA	NA	NA	NA	NA	NA	NA	NA	-0.0472748	0.514336	-10.8797	3	4.12342	1.60363	0.388907	2	0.722012	352904	268	3.4	2.56707	3.55544	5	0.0330748	0.505088	1.36399	0.172569
1215	FAM188A	1.18482	5.32093	11.0047	0.000908826	0.00917226	1.18492	5.31929	10.9361	0.000943095	0.0154607	1.32312	5.2769	46.0134	1.17e-11	6.22e-11	1.32298	5.27546	46.0037	1.18028e-11	1.08174e-10	NA	NA	NA	NA	NA	NA	NA	NA	NA	NA	NA	NA	NA	NA	NA	NA	NA	NA	NA	NA	NA	NA	NA	NA	NA	NA	NA
1216	UBP1	1.07161	7.38213	7.0624	0.00787185	0.045501	1.07172	7.3805	7.07744	0.00780605	0.0743102	1.3183	7.18244	175.321	5.1e-40	9.63e-39	1.31816	7.181	175.284	5.19121e-40	1.69889e-38	NA	NA	NA	NA	NA	NA	NA	NA	NA	NA	NA	NA	1.07867	0	0	1	1.07867	57304.1	540	4	0	0	1	0.158647	1.97897	0.464901	0.642003
1217	CHIC2	0.984576	4.63511	4.09509	0.0430078	0.148689	0.98467	4.63347	4.08399	0.0432912	0.244099	1.31731	5.35565	48.3251	3.61e-12	1.99e-11	1.31718	5.35422	48.315	3.62974e-12	3.45301e-11	NA	NA	NA	NA	NA	NA	NA	NA	NA	NA	NA	NA	NA	NA	NA	NA	NA	NA	NA	NA	NA	NA	NA	NA	NA	NA	NA
1218	ZNF281	1.78651	5.82093	23.078	1.56e-06	4.53e-05	1.7866	5.8193	23.0565	1.5731e-06	7.47239e-05	1.31705	5.45561	51.9052	5.82e-13	3.4e-12	1.31692	5.45417	51.8943	5.85703e-13	5.91976e-12	NA	NA	NA	NA	NA	NA	NA	NA	NA	NA	NA	NA	NA	NA	NA	NA	NA	NA	NA	NA	NA	NA	NA	NA	NA	NA	NA
1219	DBF4	2.50503	4.88794	20.1558	7.14e-06	0.000167836	2.50513	4.88631	20.0863	7.40247e-06	0.000283734	1.31542	5.3726	48.7842	2.86e-12	1.58e-11	1.31529	5.37116	48.774	2.87228e-12	2.74984e-11	NA	NA	NA	NA	NA	NA	NA	NA	NA	NA	NA	NA	NA	NA	NA	NA	NA	NA	NA	NA	NA	NA	NA	NA	NA	NA	NA
1220	MGAM	NA	NA	NA	NA	NA	2.01804	1.68731	2.02112	0.155125	0.547792	1.31482	1.85436	2.49208	0.114421	0.15737	1.31469	1.85294	2.49158	0.114457	0.269589	NA	NA	NA	NA	NA	NA	NA	NA	NA	NA	NA	NA	NA	NA	NA	NA	NA	NA	NA	NA	NA	NA	NA	NA	NA	NA	NA
1221	PFDN2	1.66194	5.66378	21.7745	3.07e-06	8.08e-05	1.66204	5.66216	21.7105	3.17046e-06	0.000136433	1.31309	5.98135	75.1156	4.44e-18	3.57e-17	1.31295	5.97991	75.0997	4.47523e-18	6.22833e-17	-0.135523	0.693134	-5.1145	14	0.509159	0.403394	0.792275	9	0.205719	0.670793	3.26073	12	0.20176	0.530928	2.63148	7	0.20176	1.01804e+06	154	3.36842	0.677745	3.35916	19	-0.000981564	0.190332	1.0652	0.286784
1222	ACSL3	1.23298	7.75185	11.7867	0.000596562	0.00660999	1.23308	7.75022	11.8314	0.000582396	0.0106107	1.31197	7.69675	247.618	8.58e-56	2.39e-54	1.31184	7.6953	247.566	8.81358e-56	4.25376e-54	0.106144	0.784078	7.38696	12	0.440183	0.6774	1.5389	18	0.620221	0.947397	1.52751	27	0.22747	1.88292	8.27768	65	0.26165	772100	720	3.70652	1.27449	4.87095	92	-0.000243237	0.0811384	3.22774	0.00124773
1223	YOD1	1.2237	2.98824	3.82361	0.0505353	0.165588	1.22381	2.9866	3.79653	0.051359	0.27333	1.31021	2.5643	5.25457	0.0218892	0.0359643	1.31008	2.56287	5.25348	0.0219029	0.062242	NA	NA	NA	NA	NA	NA	NA	NA	NA	NA	NA	NA	NA	NA	NA	NA	NA	NA	NA	NA	NA	NA	NA	NA	NA	NA	NA
1224	UGDH	1.0005	6.11501	6.6704	0.00980273	0.0529718	1.00062	6.11337	6.6796	0.00975226	0.0863344	1.30976	6.69257	123.29	1.21e-28	1.59e-27	1.30962	6.69113	123.263	1.22109e-28	2.7809e-27	0.0613905	0.799658	13.0258	11	0.597156	1.03739	1.73722	10	0.393158	0.738774	1.87908	117	0.11722	0.803407	6.85383	103	0.335868	1.10614e+06	494	3.46818	0.876292	2.60904	220	-0.0027126	0.0520739	6.50192	7.9303e-11
1225	FOXO1	-0.807326	6.78947	0.433174	0.510436	0.69882	-0.807165	6.78778	0.432027	0.510996	1	1.30765	5.4655	51.6045	6.79e-13	3.95e-12	1.30751	5.46406	51.5935	6.82667e-13	6.87009e-12	NA	NA	NA	NA	NA	NA	NA	NA	NA	NA	NA	NA	NA	NA	NA	NA	NA	NA	NA	NA	NA	NA	NA	NA	NA	NA	NA
1226	SPATA2	1.02744	4.48553	6.4376	0.0111729	0.0582941	1.02754	4.48389	6.42453	0.0112555	0.0958757	1.30737	4.23536	20.8754	4.9e-06	1.51e-05	1.30724	4.23392	20.8709	4.91291e-06	2.61794e-05	-13.5141	10.1663	-0.752278	10	-13.8355	1.56991	-0.113469	3	NA	NA	NA	NA	8.81009	3.25808	0.369812	3	8.81009	1.97494e+06	520	4	3.25808	0.369812	3	0.00583811	0.703681	12.5117	6.44242e-36
1227	EDNRB	-0.65055	5.22932	0.26572	0.606217	0.768582	-0.650392	5.22764	0.26473	0.606889	1	1.30501	3.40122	10.8206	0.00100377	0.00216711	1.30488	3.39979	10.8183	0.001005	0.00375502	NA	NA	NA	NA	NA	NA	NA	NA	NA	NA	NA	NA	NA	NA	NA	NA	NA	NA	NA	NA	NA	NA	NA	NA	NA	NA	NA
1228	RBM28	1.06097	5.74015	7.57951	0.00590354	0.0374202	1.06107	5.73852	7.56392	0.00595482	0.0616974	1.30294	5.38147	48.267	3.72e-12	2.04e-11	1.3028	5.38003	48.2568	3.73907e-12	3.54739e-11	-0.804608	1.16418	-1.44689	3	-0.450794	0.821659	-1.82269	2	0.200634	0.888171	4.42683	14	-0.221111	1.41374	-6.39379	16	0.09475	344820	759	3.53333	1.1306	11.9324	30	-0.00044423	0.147416	0.645751	0.518441
1229	BMP2K	1.66909	5.04459	16.9602	3.82e-05	0.000697329	1.66918	5.04296	16.8744	3.99367e-05	0.00118699	1.30279	4.52636	25.8159	3.76e-07	1.32e-06	1.30266	4.52492	25.8104	3.76658e-07	2.29009e-06	NA	NA	NA	NA	NA	NA	NA	NA	NA	NA	NA	NA	NA	NA	NA	NA	NA	NA	NA	NA	NA	NA	NA	NA	NA	NA	NA
1230	PACRGL	1.07836	3.83918	5.20106	0.0225731	0.0968095	1.07848	3.83755	5.15807	0.0231386	0.16128	1.30188	3.81724	15.0182	0.000106477	0.000270702	1.30175	3.81581	15.0151	0.000106656	0.00046914	NA	NA	NA	NA	NA	NA	NA	NA	NA	NA	NA	NA	NA	NA	NA	NA	NA	NA	NA	NA	NA	NA	NA	NA	NA	NA	NA
1231	C12orf55	1.70825	3.06965	7.15439	0.00747805	0.0441171	1.70835	3.06801	7.10918	0.00766903	0.073622	1.2997	3.15127	8.72972	0.00313064	0.00612768	1.29957	3.14984	8.72789	0.00313379	0.0106164	NA	NA	NA	NA	NA	NA	NA	NA	NA	NA	NA	NA	NA	NA	NA	NA	NA	NA	NA	NA	NA	NA	NA	NA	NA	NA	NA
1232	CTDSPL2	1.50363	6.32617	16.4301	5.05e-05	0.000885675	1.50374	6.32454	16.4649	4.95602e-05	0.00143058	1.29837	6.61591	115.025	7.77e-27	9.44e-26	1.29824	6.61447	115	7.86843e-27	1.6541e-25	NA	NA	NA	NA	NA	NA	NA	NA	-0.0602558	0.873506	-14.4966	2	NA	NA	NA	NA	-0.0602558	368152	466	3	0.873506	-14.4966	2	0.00901579	1.42639	-0.0485644	0.961266
1233	RASSF8	0.606149	5.74153	2.96654	0.0850035	0.231862	0.606249	5.73989	2.96129	0.0852797	0.377954	1.29664	6.36598	96.316	9.79e-23	1.02e-21	1.29651	6.36454	96.2954	9.89602e-23	1.78442e-21	NA	NA	NA	NA	NA	NA	NA	NA	-3.28024	0	0	1	NA	NA	NA	NA	-3.28024	267970	419	3	0	0	1	0.11329	1.96543	-1.72661	0.0842376
1234	TNKS2	1.6109	7.66495	17.8117	2.44e-05	0.000479598	1.61101	7.66332	17.8668	2.36916e-05	0.00076581	1.29553	7.44878	204.162	2.58e-46	5.85e-45	1.29539	7.44734	204.118	2.63717e-46	1.03533e-44	NA	NA	NA	NA	NA	NA	NA	NA	NA	NA	NA	NA	NA	NA	NA	NA	NA	NA	NA	NA	NA	NA	NA	NA	NA	NA	NA
1235	ORC6	2.16779	4.10347	15.7169	7.36e-05	0.00122079	2.16789	4.10183	15.6344	7.68443e-05	0.00207312	1.2955	5.20615	42.0918	8.71e-11	4.3e-10	1.29537	5.20471	42.0828	8.74885e-11	7.4747e-10	NA	NA	NA	NA	NA	NA	NA	NA	NA	NA	NA	NA	NA	NA	NA	NA	NA	NA	NA	NA	NA	NA	NA	NA	NA	NA	NA
1236	CA5BP1	1.29707	3.89595	5.72527	0.0167225	0.0781056	1.29718	3.89431	5.69252	0.0170374	0.129569	1.29534	3.82273	14.9474	0.00011055	0.000280412	1.29521	3.8213	14.9442	0.000110736	0.00048607	NA	NA	NA	NA	NA	NA	NA	NA	NA	NA	NA	NA	NA	NA	NA	NA	NA	NA	NA	NA	NA	NA	NA	NA	NA	NA	NA
1237	ABI1	0.982911	6.42206	8.11311	0.00439463	0.0302728	0.983016	6.42042	8.13563	0.00434037	0.04929	1.2932	6.61581	114.206	1.17e-26	1.41e-25	1.29307	6.61437	114.182	1.18888e-26	2.47453e-25	NA	NA	NA	NA	NA	NA	NA	NA	0.439706	2.38681	5.42821	6	0.511779	1.95606	3.82209	3	0.511779	834620	509	3.33333	1.42432	2.78307	9	0.0145425	0.297274	1.67265	0.094396
1238	TROVE2	1.11538	6.63476	6.31291	0.0119862	0.0614124	1.1155	6.63313	6.31756	0.0119548	0.100385	1.29245	6.54629	108.659	1.93e-25	2.21e-24	1.29232	6.54485	108.635	1.95076e-25	3.86533e-24	0.170485	0.722503	4.23793	9	0.252085	0.65114	2.58301	8	0.139153	0.695913	5.00105	66	0.198494	1.27742	6.43553	51	0.157659	828582	538	3.4359	0.853502	5.41358	117	0.00148497	0.0737979	2.11624	0.0343241
1239	CIAPIN1	1.32347	5.81297	12.9224	0.000324674	0.00401503	1.32358	5.81134	12.9081	0.000327155	0.00665151	1.29196	5.97464	72.6085	1.58e-17	1.22e-16	1.29182	5.9732	72.5929	1.5935e-17	2.13579e-16	0.188195	0.123393	0.655664	2	0.657941	0.232565	0.353474	2	0.185218	2.59566	14.0141	8	0.582728	0.708634	1.21606	8	0.447082	419862	312	3.5	1.13239	2.53286	16	-0.0107119	0.201746	2.26916	0.0232588
1240	POLR3K	2.02731	3.71411	12.8258	0.000341879	0.00419225	2.02741	3.71248	12.7323	0.000359395	0.00714816	1.28998	3.97596	16.7127	4.35e-05	0.000117308	1.28985	3.97453	16.7091	4.35712e-05	0.000203387	NA	NA	NA	NA	NA	NA	NA	NA	NA	NA	NA	NA	3.77498	0	0	1	3.77498	120602	108	4	0	0	1	0.123807	2.08643	1.74996	0.0801256
1241	RAB8B	1.39497	6.91345	13.1839	0.000282367	0.00360628	1.39506	6.91182	13.2095	0.00027854	0.00584379	1.28977	7.23044	174.197	8.96e-40	1.68e-38	1.28964	7.229	174.16	9.13406e-40	2.9616e-38	0.0406448	0.374579	9.21592	3	0.505693	0.183608	0.363083	2	0.659824	0.355894	0.539377	8	0.116754	1.17737	10.0842	11	0.579456	421680	207	3.57895	0.814032	1.40482	19	-0.00381587	0.193101	3.02055	0.00252314
1242	RNF11	1.65782	8.03475	16.0532	6.16e-05	0.0010381	1.65791	8.03313	16.0885	6.04506e-05	0.00167467	1.28899	8.19563	336.849	3.1e-75	1.17e-73	1.28886	8.19419	336.776	3.21369e-75	2.10018e-73	NA	NA	NA	NA	NA	NA	NA	NA	-0.631537	0	0	1	NA	NA	NA	NA	-0.631537	152880	154	3	0	0	1	0.00665494	1.79712	-0.35512	0.7225
1243	TMEM33	1.34691	6.49101	13.4276	0.000247948	0.00326637	1.34702	6.48938	13.4556	0.00024427	0.00527738	1.28794	6.44708	100.723	1.06e-23	1.14e-22	1.2878	6.44563	100.701	1.06978e-23	1.99746e-22	NA	NA	NA	NA	NA	NA	NA	NA	1.10753	0.322043	0.290775	4	NA	NA	NA	NA	1.10753	1.1032e+06	247	3	0.322043	0.290775	4	0.0316312	0.636862	1.68938	0.0911465
1244	SLMO2	1.43891	6.3941	14.977	0.000108829	0.00170066	1.43903	6.39247	15.0101	0.000106935	0.00274085	1.28712	6.68873	119.141	9.75e-28	1.22e-26	1.28699	6.68728	119.115	9.88101e-28	2.148e-26	NA	NA	NA	NA	NA	NA	NA	NA	NA	NA	NA	NA	-12.6519	0	0	1	-12.6519	8.66563e+06	194	4	0	0	1	0.0304807	2.05255	-6.17882	6.45805e-10
1245	WAPAL	1.33269	7.3051	9.72536	0.00181743	0.0155205	1.33281	7.30347	9.74091	0.00180212	0.0254339	1.28694	7.0557	153.771	2.6e-35	4.19e-34	1.28681	7.05426	153.738	2.64206e-35	7.38339e-34	NA	NA	NA	NA	-1.4582	0	0	1	NA	NA	NA	NA	3.46145	0	0	1	3.46145	127729	1275	4	0	0	1	0.0945325	2.15844	1.55989	0.118786
1246	SHOC2	1.1929	6.74009	10.5076	0.00118884	0.0112755	1.19301	6.73845	10.5323	0.00117307	0.0183259	1.28356	6.68664	118.37	1.44e-27	1.79e-26	1.28342	6.6852	118.344	1.45775e-27	3.13975e-26	NA	NA	NA	NA	NA	NA	NA	NA	1.32928	2.11769	1.59311	7	-0.763085	0.271454	-0.355732	2	0.950694	406994	582	3.22222	1.82349	1.91806	9	-0.000788485	0.294079	3.23547	0.00121443
1247	SMG1	0.971966	7.9108	5.32687	0.0209991	0.0919289	0.972078	7.90916	5.33802	0.0208651	0.149606	1.28348	7.67282	234.115	7.55e-53	1.98e-51	1.28335	7.67137	234.064	7.74444e-53	3.5122e-51	1.37744	1.0456	0.75909	3	NA	NA	NA	NA	0.20687	2.62294	12.6792	4	NA	NA	NA	NA	0.20687	196081	3662	3	2.62294	12.6792	4	-0.0216463	0.577513	0.395691	0.692333
1248	CDYL	1.67829	5.25107	16.4077	5.11e-05	0.00089375	1.67838	5.24943	16.3082	5.38301e-05	0.00151843	1.28269	5.11322	38.6483	5.07e-10	2.35e-09	1.28256	5.11178	38.64	5.09643e-10	4.09329e-09	NA	NA	NA	NA	NA	NA	NA	NA	NA	NA	NA	NA	NA	NA	NA	NA	NA	NA	NA	NA	NA	NA	NA	NA	NA	NA	NA
1249	CPSF6	1.26155	7.25753	10.3378	0.00130331	0.012105	1.26165	7.2559	10.3612	0.00128693	0.0196927	1.28199	7.16309	164.494	1.18e-37	2.06e-36	1.28186	7.16165	164.459	1.20093e-37	3.63615e-36	0.0048816	0.483308	99.006	3	0.440262	4.30234	9.77222	4	0.541613	1.09534	2.02237	19	-0.287869	0.91376	-3.17422	20	0.263475	674189	588	3.51282	1.05888	4.0189	39	0.00453587	0.129929	1.99293	0.0462689
1250	ING1	0.94268	4.28467	4.89276	0.0269695	0.108766	0.942785	4.28303	4.8746	0.0272548	0.179282	1.28162	4.74199	29.4102	5.86e-08	2.23e-07	1.28148	4.74056	29.4038	5.87613e-08	3.88046e-07	NA	NA	NA	NA	NA	NA	NA	NA	NA	NA	NA	NA	NA	NA	NA	NA	NA	NA	NA	NA	NA	NA	NA	NA	NA	NA	NA
1251	NDEL1	2.08715	7.01873	30.2798	3.74e-08	1.72e-06	2.08724	7.01711	30.3554	3.59696e-08	2.7227e-06	1.28105	6.74413	122.78	1.56e-28	2.04e-27	1.28091	6.74269	122.754	1.57867e-28	3.57973e-27	0.378212	0	0	1	1.70074	0	0	1	NA	NA	NA	NA	4.30462	2.64301	0.613995	3	4.30462	184679	367	4	2.64301	0.613995	3	-0.0246804	0.715453	6.05113	1.43837e-09
1252	NCOA7	1.98606	6.1516	18.9953	1.31e-05	0.000282766	1.98617	6.14997	19.0044	1.30418e-05	0.000460467	1.27985	6.36558	94.0406	3.09e-22	3.17e-21	1.27972	6.36414	94.0202	3.12318e-22	5.55076e-21	NA	NA	NA	NA	NA	NA	NA	NA	0.37372	5.73248	15.3389	4	NA	NA	NA	NA	0.37372	216828	942	3	5.73248	15.3389	4	0.0282934	0.582045	0.593471	0.552866
1253	XPR1	1.09368	6.64351	7.00145	0.00814436	0.0465541	1.0938	6.64187	7.01049	0.00810336	0.076032	1.27965	6.63259	113.362	1.8e-26	2.14e-25	1.27952	6.63115	113.337	1.82027e-26	3.75897e-25	NA	NA	NA	NA	NA	NA	NA	NA	NA	NA	NA	NA	NA	NA	NA	NA	NA	NA	NA	NA	NA	NA	NA	NA	NA	NA	NA
1254	LATS2	0.472731	7.08448	1.33601	0.247738	0.455036	0.472826	7.08285	1.33809	0.247372	0.721362	1.27957	7.02838	149.326	2.43e-34	3.82e-33	1.27943	7.02693	149.294	2.47363e-34	6.70781e-33	NA	NA	NA	NA	NA	NA	NA	NA	NA	NA	NA	NA	NA	NA	NA	NA	NA	NA	NA	NA	NA	NA	NA	NA	NA	NA	NA
1255	HMOX2	0.882796	5.19391	4.8178	0.0281673	0.112085	0.882886	5.19228	4.79303	0.0285752	0.185075	1.27932	5.78763	62.4639	2.71e-15	1.84e-14	1.27918	5.78619	62.4503	2.73249e-15	3.20511e-14	0.0602727	0.111171	1.84447	2	-0.231065	0.343018	-1.48451	2	0.229253	0.322307	1.4059	11	-0.0377199	0.450747	-11.9498	12	0.086241	799139	302.13	3.52174	0.524119	6.07737	23	-0.00434448	0.174596	0.51883	0.603879
1256	ZNF644	1.27503	6.58279	8.48815	0.00357466	0.0260327	1.27514	6.58116	8.49433	0.00356255	0.0425464	1.27913	6.37879	94.8197	2.09e-22	2.15e-21	1.27899	6.37735	94.7992	2.10716e-22	3.75135e-21	NA	NA	NA	NA	NA	NA	NA	NA	NA	NA	NA	NA	NA	NA	NA	NA	NA	NA	NA	NA	NA	NA	NA	NA	NA	NA	NA
1257	GTPBP10	1.06491	4.88533	7.86243	0.00504724	0.0333223	1.06501	4.88369	7.83435	0.00512627	0.0552405	1.27909	4.71509	28.7254	8.34e-08	3.13e-07	1.27895	4.71365	28.7192	8.36705e-08	5.43923e-07	NA	NA	NA	NA	NA	NA	NA	NA	NA	NA	NA	NA	NA	NA	NA	NA	NA	NA	NA	NA	NA	NA	NA	NA	NA	NA	NA
1258	ZNF844	0.180875	4.4526	0.129298	0.719161	0.843437	0.18098	4.45095	0.1291	0.719367	1	1.27843	3.42736	10.6504	0.00110047	0.0023558	1.27829	3.42593	10.6481	0.00110183	0.00408201	NA	NA	NA	NA	NA	NA	NA	NA	NA	NA	NA	NA	NA	NA	NA	NA	NA	NA	NA	NA	NA	NA	NA	NA	NA	NA	NA
1259	NCOA3	1.00144	6.46662	6.51881	0.010674	0.0562384	1.00156	6.46498	6.53024	0.0106056	0.0917276	1.27839	6.79517	126.762	2.09e-29	2.83e-28	1.27826	6.79373	126.735	2.1234e-29	4.95924e-28	NA	NA	NA	NA	NA	NA	NA	NA	NA	NA	NA	NA	NA	NA	NA	NA	NA	NA	NA	NA	NA	NA	NA	NA	NA	NA	NA
1260	EFNB2	1.51407	5.07783	4.64941	0.0310643	0.119402	1.51418	5.07619	4.63078	0.0314032	0.196925	1.27792	5.04446	36.5145	1.52e-09	6.75e-09	1.27779	5.04303	36.5066	1.52154e-09	1.17281e-08	NA	NA	NA	NA	NA	NA	NA	NA	NA	NA	NA	NA	-0.419822	0	0	1	-0.419822	89427.7	333	4	0	0	1	-0.0151011	2.02979	-0.19939	0.841958
1261	SMNDC1	1.5425	6.1503	17.6036	2.72e-05	0.00052777	1.5426	6.14867	17.6393	2.67017e-05	0.000852632	1.27772	6.02664	73.8344	8.5e-18	6.72e-17	1.27759	6.02519	73.8184	8.56463e-18	1.17258e-16	-0.55363	0	0	1	NA	NA	NA	NA	0.143811	0	0	1	0.470624	0.273019	0.580121	3	0.307217	1.36048e+06	238	3.75	0.38162	1.24218	4	0.0388394	0.602152	0.445698	0.655815
1262	SENP6	0.82573	6.90514	4.0115	0.0451908	0.153618	0.825839	6.9035	4.01752	0.04503	0.250281	1.27693	6.85731	132.085	1.43e-30	2e-29	1.27679	6.85586	132.056	1.45427e-30	3.5054e-29	NA	NA	NA	NA	NA	NA	NA	NA	NA	NA	NA	NA	NA	NA	NA	NA	NA	NA	NA	NA	NA	NA	NA	NA	NA	NA	NA
1263	SAFB2	1.17149	6.5112	11.7159	0.000619669	0.00679997	1.17159	6.50957	11.7484	0.000608966	0.011009	1.27668	6.33779	91.818	9.5e-22	9.48e-21	1.27654	6.33635	91.7981	9.59857e-22	1.65695e-20	0.06524	0.400274	6.1354	3	0.133501	1.02691	7.69215	4	0.349986	3.27515	9.35794	5	1.35615	1.00074	0.737931	4	0.714392	628079	953	3.44444	2.29919	3.21838	9	0.00722948	0.305298	2.3163	0.0205419
1264	ZNF850	1.94399	2.87428	7.2287	0.00717472	0.0429382	1.94411	2.87264	7.18311	0.00735931	0.0717124	1.27509	3.38578	10.2472	0.00136892	0.00288008	1.27495	3.38435	10.245	0.00137055	0.00499058	NA	NA	NA	NA	NA	NA	NA	NA	NA	NA	NA	NA	NA	NA	NA	NA	NA	NA	NA	NA	NA	NA	NA	NA	NA	NA	NA
1265	UBXN7	1.30566	7.41052	11.2735	0.000786215	0.00820074	1.30577	7.40889	11.3029	0.000773861	0.0133588	1.27393	7.10347	156.041	8.29e-36	1.38e-34	1.2738	7.10202	156.007	8.43709e-36	2.42543e-34	NA	NA	NA	NA	NA	NA	NA	NA	0.566774	0.832957	1.46965	5	0.0898569	3.4511	38.4067	8	0.148733	213146	489	3.61538	1.16395	7.82575	13	-0.00153439	0.235798	0.637272	0.523948
1266	DHX9	1.87752	8.32314	16.8501	4.05e-05	0.000733769	1.87763	8.32151	16.878	3.98607e-05	0.0011864	1.27328	8.6777	342.795	1.57e-76	6.12e-75	1.27315	8.67626	341.099	3.67656e-76	2.46388e-74	0.139284	1.0772	7.7338	110	0.229048	0.564378	2.46401	122	0.281613	0.619761	2.20075	183	0.00553463	0.974067	175.995	218	0.17654	1.5541e+06	1270	3.54364	0.861939	4.88239	401	0.00126026	0.0397976	4.40429	1.06131e-05
1267	SPATS2	1.7272	6.00862	18.9298	1.36e-05	0.0002907	1.72731	6.00699	18.9413	1.348e-05	0.000474348	1.27082	6.2757	87.1655	9.98e-21	9.35e-20	1.27069	6.27425	87.1465	1.00775e-20	1.63501e-19	NA	NA	NA	NA	NA	NA	NA	NA	-0.606015	0.329992	-0.544528	3	5.8186	3.02489	0.519865	3	-0.240947	436423	545	3.5	4.90885	-20.3731	6	-0.00134103	0.372277	-0.643623	0.51982
1268	SOCS3	0.346686	3.82064	0.37326	0.541233	0.721475	0.346787	3.819	0.371127	0.542391	1	1.27016	4.33408	21.3529	3.82e-06	1.19e-05	1.27003	4.33265	21.3483	3.82965e-06	2.0674e-05	NA	NA	NA	NA	NA	NA	NA	NA	NA	NA	NA	NA	NA	NA	NA	NA	NA	NA	NA	NA	NA	NA	NA	NA	NA	NA	NA
1269	NUP50	1.55334	6.67392	10.3553	0.00129103	0.0120144	1.55345	6.67229	10.3578	0.00128927	0.0196927	1.26929	6.76662	122.668	1.65e-28	2.16e-27	1.26915	6.76518	122.642	1.67051e-28	3.7839e-27	NA	NA	NA	NA	NA	NA	NA	NA	1.33022	0.569627	0.42822	2	0.384143	0	0	1	0.760593	428789	468	3.33333	0.757852	0.996396	3	0.0154195	0.759823	0.98072	0.326731
1270	MBTD1	0.722013	4.7682	2.11659	0.145711	0.328454	0.722117	4.76656	2.11151	0.146195	0.530001	1.26865	4.79709	30.0689	4.17e-08	1.61e-07	1.26852	4.79565	30.0624	4.18374e-08	2.80377e-07	NA	NA	NA	NA	NA	NA	NA	NA	-7.38357	1.36784	-0.185254	2	6.9855	0.018893	0.00270459	2	0.475439	531351	628	3.5	13.6757	28.7644	4	-0.0321755	0.637913	0.795744	0.426181
1271	ZMAT2	1.31597	6.58585	14.7173	0.000124893	0.0018897	1.31607	6.58422	14.7614	0.000122006	0.00304192	1.26858	6.47925	100.226	1.36e-23	1.46e-22	1.26844	6.47781	100.204	1.37472e-23	2.55775e-22	NA	NA	NA	NA	1.21575	0	0	1	3.04121	0	0	1	1.01733	0.208091	0.204546	2	1.22542	645236	199	3.66667	1.11599	0.910697	3	0.0207433	0.908799	1.32557	0.184982
1272	EP300	0.632588	7.41045	3.31298	0.0687347	0.201872	0.632687	7.40881	3.32562	0.0682083	0.326577	1.26827	7.02489	146.603	9.58e-34	1.47e-32	1.26814	7.02345	146.571	9.73969e-34	2.57478e-32	NA	NA	NA	NA	NA	NA	NA	NA	NA	NA	NA	NA	NA	NA	NA	NA	NA	NA	NA	NA	NA	NA	NA	NA	NA	NA	NA
1273	GALM	1.61611	4.65409	14.8698	0.000115195	0.00177428	1.61621	4.65246	14.8312	0.000117572	0.00296053	1.26764	4.00666	16.5817	4.66e-05	0.000125118	1.2675	4.00523	16.5781	4.66872e-05	0.00021697	-6.98882	0	0	1	0.0683559	0	0	1	0.147088	0.34499	2.34546	3	0.510518	0.474208	0.928875	2	0.147088	1.25241e+06	342	3.4	0.122426	0.83233	5	-0.0153112	0.466449	0.348162	0.727719
1274	CLPX	0.881013	6.20111	7.01486	0.00808362	0.0463465	0.881117	6.19947	7.03582	0.00798952	0.0753242	1.26672	6.31062	88.8136	4.34e-21	4.14e-20	1.26659	6.30917	88.7942	4.38104e-21	7.24196e-20	NA	NA	NA	NA	1.2509	0	0	1	-0.546589	1.1559	-2.11475	4	0.20139	1.35397	6.72312	4	-0.18441	261850	633	3.5	1.16647	-6.32542	8	0.0102573	0.306053	-0.636057	0.524739
1275	RNF4	1.53002	7.09362	16.9926	3.75e-05	0.000692102	1.53011	7.09199	17.0371	3.66568e-05	0.00112117	1.26646	7.37212	185.893	2.5e-42	5.02e-41	1.26633	7.37067	185.853	2.55655e-42	8.87746e-41	NA	NA	NA	NA	NA	NA	NA	NA	NA	NA	NA	NA	NA	NA	NA	NA	NA	NA	NA	NA	NA	NA	NA	NA	NA	NA	NA
1276	COQ10B	0.92129	5.13333	4.60734	0.0318354	0.121763	0.921384	5.1317	4.58628	0.032229	0.200572	1.26529	5.28297	42.6391	6.58e-11	3.29e-10	1.26515	5.28154	42.6297	6.61461e-11	5.70924e-10	NA	NA	NA	NA	NA	NA	NA	NA	NA	NA	NA	NA	NA	NA	NA	NA	NA	NA	NA	NA	NA	NA	NA	NA	NA	NA	NA
1277	NOP2	1.25608	5.69792	6.1105	0.0134381	0.0665072	1.25619	5.69628	6.09172	0.0135817	0.109754	1.26462	5.86081	64.4362	9.97e-16	6.91e-15	1.26449	5.85937	64.4221	1.00425e-15	1.20481e-14	0.209029	0.500178	2.39287	6	0.309936	0.202894	0.65463	8	0.0497623	0.777485	15.624	29	-0.511858	0.732803	-1.43165	22	-0.174353	801652	845	3.43137	1.01405	-5.81606	51	0.00132672	0.10995	-1.59782	0.110082
1278	PERP	0.891488	4.58793	4.39163	0.0361157	0.132582	0.89159	4.58629	4.38203	0.0363197	0.217494	1.26383	3.87204	14.8581	0.000115909	0.000292845	1.2637	3.87061	14.8549	0.000116108	0.000507743	NA	NA	NA	NA	NA	NA	NA	NA	NA	NA	NA	NA	NA	NA	NA	NA	NA	NA	NA	NA	NA	NA	NA	NA	NA	NA	NA
1279	BRAP	0.918826	5.34264	6.60498	0.0101694	0.0544082	0.918919	5.34101	6.56521	0.0103992	0.0905751	1.26264	5.16064	38.8765	4.51e-10	2.11e-09	1.26251	5.1592	38.8679	4.53465e-10	3.66306e-09	NA	NA	NA	NA	NA	NA	NA	NA	NA	NA	NA	NA	NA	NA	NA	NA	NA	NA	NA	NA	NA	NA	NA	NA	NA	NA	NA
1280	ETV3	1.07691	5.66839	9.68895	0.0018538	0.0157898	1.07701	5.66676	9.66188	0.00188131	0.0262018	1.26249	5.55786	51.7493	6.31e-13	3.67e-12	1.26236	5.55642	51.738	6.34232e-13	6.39184e-12	NA	NA	NA	NA	NA	NA	NA	NA	NA	NA	NA	NA	NA	NA	NA	NA	NA	NA	NA	NA	NA	NA	NA	NA	NA	NA	NA
1281	PCNX	0.61347	7.35964	1.2508	0.263399	0.473522	0.613597	7.35799	1.25087	0.263386	0.748371	1.26159	7.12493	155.609	1.03e-35	1.7e-34	1.26146	7.12349	155.575	1.0486e-35	2.98994e-34	NA	NA	NA	NA	NA	NA	NA	NA	NA	NA	NA	NA	NA	NA	NA	NA	NA	NA	NA	NA	NA	NA	NA	NA	NA	NA	NA
1282	TUBB4B	2.21566	9.02973	30.2937	3.71e-08	1.72e-06	2.21576	9.02811	30.3883	3.53651e-08	2.6866e-06	1.26115	9.98597	589.927	2.6e-130	2.04e-128	1.26102	9.98452	589.029	4.07558e-130	5.428e-128	0.44121	0.786515	1.78263	12	0.465211	0.230113	0.494643	11	0.186973	0.207344	1.10895	16	-0.20773	0.35214	-1.69518	16	0.120596	2.13218e+07	445	3.5	0.444676	3.68731	32	-0.00221655	0.136689	0.898485	0.368927
1283	U2AF1	1.96851	7.15991	27.462	1.6e-07	6.15e-06	1.96861	7.15829	27.5389	1.53965e-07	9.70429e-06	1.26059	7.13269	156.219	7.58e-36	1.26e-34	1.26046	7.13124	156.184	7.7153e-36	2.22097e-34	0.617866	0.439711	0.711661	2	0.760218	0.159269	0.209505	2	0.394443	0.49589	1.25719	25	-0.183233	0.936931	-5.11333	18	0.236303	411214	240	3.4186	0.821392	3.47601	43	-0.000985533	0.121693	1.94989	0.0511887
1284	ZC3H15	1.43638	6.83147	15.2046	9.65e-05	0.0015393	1.43649	6.82984	15.2433	9.45104e-05	0.0024742	1.25903	6.88081	130.869	2.65e-30	3.67e-29	1.2589	6.87937	130.84	2.68419e-30	6.43318e-29	0.171047	0.633966	3.70638	3	NA	NA	NA	NA	-0.0553675	0.404769	-7.31058	9	0.954643	2.02757	2.12391	10	0.0129087	1.46536e+06	426	3.52632	1.26092	97.6806	19	-0.0135825	0.198758	0.133283	0.893969
1285	PDE12	1.62106	6.02586	14.9625	0.000109669	0.00170757	1.62116	6.02424	14.9663	0.000109449	0.00279845	1.25754	5.85625	63.5717	1.55e-15	1.06e-14	1.25741	5.85481	63.5577	1.55737e-15	1.8515e-14	NA	NA	NA	NA	NA	NA	NA	NA	1.90898	0	0	1	NA	NA	NA	NA	1.90898	636098	609	3	0	0	1	0.108948	1.91149	0.941688	0.346353
1286	HELZ	0.851914	7.12095	6.095	0.0135565	0.0667753	0.852009	7.11932	6.1159	0.0133971	0.108969	1.25662	6.58986	106.466	5.83e-25	6.57e-24	1.25649	6.58842	106.443	5.89689e-25	1.1511e-23	NA	NA	NA	NA	NA	NA	NA	NA	NA	NA	NA	NA	NA	NA	NA	NA	NA	NA	NA	NA	NA	NA	NA	NA	NA	NA	NA
1287	ZNF57	0.46438	2.30053	0.327459	0.567159	0.740532	0.464459	2.29888	0.32626	0.56787	1	1.25497	2.53538	4.73025	0.0296365	0.0472684	1.25484	2.53396	4.72924	0.029654	0.0817516	NA	NA	NA	NA	NA	NA	NA	NA	NA	NA	NA	NA	NA	NA	NA	NA	NA	NA	NA	NA	NA	NA	NA	NA	NA	NA	NA
1288	PRPF3	1.39201	5.87165	14.1261	0.000170958	0.00242414	1.39211	5.87002	14.1188	0.000171623	0.00399499	1.25456	6.04321	72.2712	1.88e-17	1.45e-16	1.25443	6.04177	72.2552	1.8909e-17	2.51837e-16	-0.110136	6.19958	-56.29	3	NA	NA	NA	NA	0.395695	0.541273	1.3679	9	0.519131	0.549223	1.05797	17	0.501743	651064	683	3.65385	0.657468	1.31037	26	-0.00245565	0.155126	3.25026	0.001153
1289	ATP13A3	0.254658	7.68818	0.264274	0.607199	0.769454	0.254738	7.68655	0.264458	0.607074	1	1.25442	7.70262	229.22	8.82e-52	2.23e-50	1.25428	7.70117	229.169	9.04762e-52	3.95819e-50	NA	NA	NA	NA	NA	NA	NA	NA	NA	NA	NA	NA	NA	NA	NA	NA	NA	NA	NA	NA	NA	NA	NA	NA	NA	NA	NA
1290	POC5	1.47381	3.97893	10.2809	0.00134412	0.0123919	1.4739	3.9773	10.209	0.00139758	0.0209021	1.25408	3.93643	15.4009	8.69e-05	0.000224425	1.25394	3.93499	15.3976	8.71005e-05	0.000388976	NA	NA	NA	NA	NA	NA	NA	NA	NA	NA	NA	NA	NA	NA	NA	NA	NA	NA	NA	NA	NA	NA	NA	NA	NA	NA	NA
1291	ZNF195	1.16803	4.99483	6.8912	0.00866212	0.0485309	1.16813	4.9932	6.86527	0.00878869	0.080374	1.25219	4.69778	27.2934	1.75e-07	6.31e-07	1.25205	4.69634	27.2874	1.75353e-07	1.09559e-06	NA	NA	NA	NA	NA	NA	NA	NA	NA	NA	NA	NA	NA	NA	NA	NA	NA	NA	NA	NA	NA	NA	NA	NA	NA	NA	NA
1292	TMEM132A	-0.635556	7.46676	1.4873	0.222637	0.427299	-0.635484	7.46512	1.48649	0.222762	0.680248	1.25182	5.75772	58.7837	1.76e-14	1.13e-13	1.25169	5.75628	58.7707	1.77163e-14	1.97355e-13	NA	NA	NA	NA	NA	NA	NA	NA	-3.36643	0	0	1	NA	NA	NA	NA	-3.36643	88340.3	1024	3	0	0	1	0.171604	2.17242	-1.62861	0.103395
1293	GLUD1	0.591333	7.03483	2.04863	0.152343	0.337343	0.591448	7.03319	2.05213	0.151994	0.542562	1.25172	8.02065	283.664	1.19e-63	3.78e-62	1.25159	8.0192	283.601	1.23268e-63	6.75503e-62	0.502689	0.949553	1.88895	3	NA	NA	NA	NA	-0.22923	1.16197	-5.069	23	1.1446	2.05861	1.79854	14	0.102449	549607	558	3.37838	1.4837	14.4823	37	-0.00655962	0.131835	0.826859	0.408317
1294	ETFA	1.69272	6.88519	21.7748	3.07e-06	8.08e-05	1.69283	6.88356	21.8372	2.96797e-06	0.000128773	1.25053	7.16772	157.729	3.55e-36	5.97e-35	1.2504	7.16628	157.694	3.60945e-36	1.05199e-34	-0.284432	0.402718	-1.41586	15	-0.0640252	0.341843	-5.33919	13	0.0819785	0.407415	4.96978	47	0.685513	1.85398	2.70452	46	0.181849	421257	333	3.49462	1.22275	6.72396	93	0.000584091	0.0841402	2.15432	0.0312149
1295	SEMA4D	0.108327	1.87673	0.00947811	0.922444	0.961234	0.108357	1.87509	0.00936498	0.922907	1	1.25007	1.73262	1.95155	0.16242	0.21396	1.24995	1.7312	1.95115	0.162463	0.363808	NA	NA	NA	NA	NA	NA	NA	NA	NA	NA	NA	NA	NA	NA	NA	NA	NA	NA	NA	NA	NA	NA	NA	NA	NA	NA	NA
1296	MIDN	0.179615	6.01857	0.202118	0.653017	0.800772	0.179712	6.01692	0.202391	0.652798	1	1.24924	6.1037	74.8571	5.06e-18	4.05e-17	1.24911	6.10226	74.8405	5.10324e-18	7.07428e-17	NA	NA	NA	NA	NA	NA	NA	NA	NA	NA	NA	NA	NA	NA	NA	NA	NA	NA	NA	NA	NA	NA	NA	NA	NA	NA	NA
1297	GTPBP4	1.47064	6.90861	13.3431	0.000259379	0.00337639	1.47075	6.90698	13.3661	0.000256212	0.00549532	1.24898	7.03538	143.61	4.32e-33	6.49e-32	1.24885	7.03394	143.578	4.39353e-33	1.13858e-31	-0.533642	0.420796	-0.788536	3	0.144758	3.10155	21.4258	4	0.206447	1.03869	5.03129	23	0.191239	1.00248	5.24205	27	0.198843	616429	634	3.54	1.14425	5.75451	50	-0.00166181	0.115685	1.73319	0.0830618
1298	PRDM2	0.655995	6.38157	3.33148	0.0679659	0.200254	0.656104	6.37993	3.33963	0.0676297	0.32462	1.24892	5.87291	63.5303	1.58e-15	1.08e-14	1.24879	5.87147	63.5163	1.59049e-15	1.88982e-14	NA	NA	NA	NA	NA	NA	NA	NA	NA	NA	NA	NA	NA	NA	NA	NA	NA	NA	NA	NA	NA	NA	NA	NA	NA	NA	NA
1299	FZD5	-0.13099	2.37572	0.0251221	0.874063	0.933123	-0.131053	2.37407	0.0248972	0.874623	1	1.24889	1.9926	2.67284	0.102074	0.142218	1.24877	1.99117	2.67228	0.10211	0.244004	NA	NA	NA	NA	NA	NA	NA	NA	NA	NA	NA	NA	NA	NA	NA	NA	NA	NA	NA	NA	NA	NA	NA	NA	NA	NA	NA
1300	YY1	1.47553	7.63252	16.5116	4.84e-05	0.000854202	1.47563	7.63089	16.5713	4.68537e-05	0.00135805	1.24793	7.5666	206.846	6.7e-47	1.54e-45	1.24779	7.56515	206.8	6.85456e-47	2.72152e-45	NA	NA	NA	NA	NA	NA	NA	NA	0.928386	0.521816	0.562068	5	0.254452	0.399228	1.56897	2	0.65368	503147	414	3.28571	0.797489	1.22	7	-0.0041849	0.347452	1.8934	0.0583048
1301	JUN	0.0656437	6.9657	0.035586	0.850373	0.920452	0.065735	6.96406	0.0357818	0.849967	1	1.24576	6.64053	108.579	2.01e-25	2.29e-24	1.24562	6.63908	108.555	2.03127e-25	4.0173e-24	NA	NA	NA	NA	-6.38113	0	0	1	NA	NA	NA	NA	5.4328	0	0	1	5.4328	425605	331	4	0	0	1	0.0365095	2.00115	2.6966	0.00700511
1302	STRN3	1.06634	6.1933	4.16483	0.0412715	0.144946	1.06646	6.19166	4.16325	0.0413101	0.23697	1.2452	5.97286	67.8279	1.78e-16	1.3e-15	1.24507	5.97142	67.8129	1.79774e-16	2.2639e-15	NA	NA	NA	NA	NA	NA	NA	NA	NA	NA	NA	NA	NA	NA	NA	NA	NA	NA	NA	NA	NA	NA	NA	NA	NA	NA	NA
1303	ATG2B	0.960177	6.35056	4.95827	0.0259661	0.106387	0.960296	6.34892	4.96273	0.0258993	0.173627	1.24465	6.14603	76.6081	2.08e-18	1.7e-17	1.24452	6.14459	76.5911	2.10285e-18	2.96583e-17	NA	NA	NA	NA	NA	NA	NA	NA	NA	NA	NA	NA	NA	NA	NA	NA	NA	NA	NA	NA	NA	NA	NA	NA	NA	NA	NA
1304	DACT1	1.02242	4.42644	3.65764	0.0558125	0.176651	1.02252	4.42481	3.64475	0.0562463	0.289929	1.24443	3.61785	11.8258	0.00058416	0.00131587	1.24429	3.61642	11.8232	0.000584977	0.00228041	NA	NA	NA	NA	NA	NA	NA	NA	NA	NA	NA	NA	NA	NA	NA	NA	NA	NA	NA	NA	NA	NA	NA	NA	NA	NA	NA
1305	KIAA0226	0.726775	5.41798	4.45658	0.0347671	0.128896	0.72687	5.41634	4.43355	0.0352391	0.21284	1.24392	5.19648	38.838	4.6e-10	2.15e-09	1.24379	5.19504	38.8294	4.62503e-10	3.7332e-09	NA	NA	NA	NA	NA	NA	NA	NA	NA	NA	NA	NA	NA	NA	NA	NA	NA	NA	NA	NA	NA	NA	NA	NA	NA	NA	NA
1306	BRD4	0.965066	7.53386	6.59986	0.0101987	0.0544708	0.965177	7.53222	6.61999	0.010084	0.0885888	1.24337	6.7759	118.944	1.08e-27	1.35e-26	1.24324	6.77446	118.917	1.09199e-27	2.37138e-26	0.138534	0	0	1	NA	NA	NA	NA	-0.930267	1.00656	-1.08201	3	NA	NA	NA	NA	-0.930267	719186	1362	3	1.00656	-1.08201	3	0.0387987	0.7539	-1.2854	0.198651
1307	EPC2	1.02762	5.31235	6.92164	0.00851589	0.0479522	1.02772	5.31071	6.88135	0.00871	0.0798625	1.24027	4.97103	32.7868	1.03e-08	4.26e-08	1.24014	4.9696	32.7795	1.03228e-08	7.39359e-08	NA	NA	NA	NA	NA	NA	NA	NA	NA	NA	NA	NA	NA	NA	NA	NA	NA	NA	NA	NA	NA	NA	NA	NA	NA	NA	NA
1308	LUC7L2	1.17629	7.04533	10.9981	0.000912035	0.00917963	1.17639	7.04371	11.0313	0.000895847	0.0148815	1.23957	7.11123	149.275	2.5e-34	3.91e-33	1.23944	7.10979	149.242	2.53873e-34	6.87548e-33	NA	NA	NA	NA	NA	NA	NA	NA	0.433167	0.69594	1.60663	3	1.27216	3.05152	2.3987	27	1.17675	363203	392	3.9	2.52743	2.1478	30	0.00790588	0.145035	8.05906	7.68807e-16
1309	LUC7L2	1.17629	7.04533	10.9981	0.000912035	0.00917963	-0.190026	3.46381	0.126154	0.722453	1	1.23957	7.11123	149.275	2.5e-34	3.91e-33	-0.532921	3.01744	1.45887	0.227111	0.480503	NA	NA	NA	NA	NA	NA	NA	NA	0.433167	0.69594	1.60663	3	1.27216	3.05152	2.3987	27	1.17675	363203	392	3.9	2.52743	2.1478	30	0.00790588	0.145035	8.05906	7.68807e-16
1310	LUC7L2	1.17629	7.04533	10.9981	0.000912035	0.00917963	2.84447	3.28548	5.32256	0.0210511	0.150519	1.23957	7.11123	149.275	2.5e-34	3.91e-33	1.46176	3.73389	17.2922	3.20497e-05	0.00015255	NA	NA	NA	NA	NA	NA	NA	NA	0.433167	0.69594	1.60663	3	1.27216	3.05152	2.3987	27	1.17675	363203	392	3.9	2.52743	2.1478	30	0.00790588	0.145035	8.05906	7.68807e-16
1311	AREG	1.10756	3.11731	1.76697	0.183758	0.379953	1.10765	3.11566	1.75564	0.18517	0.611191	1.23899	5.66202	53.8839	2.13e-13	1.27e-12	1.23886	5.66058	53.8719	2.14e-13	2.21397e-12	NA	NA	NA	NA	NA	NA	NA	NA	NA	NA	NA	NA	NA	NA	NA	NA	NA	NA	NA	NA	NA	NA	NA	NA	NA	NA	NA
1312	CEP78	2.26386	4.95719	20.7139	5.33e-06	0.000130637	2.26396	4.95556	20.6412	5.53911e-06	0.000221596	1.23883	5.29022	41.2529	1.34e-10	6.54e-10	1.2387	5.28878	41.2437	1.34385e-10	1.1366e-09	NA	NA	NA	NA	NA	NA	NA	NA	NA	NA	NA	NA	NA	NA	NA	NA	NA	NA	NA	NA	NA	NA	NA	NA	NA	NA	NA
1313	ZNF207	1.55285	7.95706	17.8706	2.36e-05	0.000466409	1.55295	7.95543	17.9364	2.28406e-05	0.000741721	1.23757	8.10355	293.926	6.94e-66	2.3e-64	1.23744	8.10211	293.86	7.17014e-66	4.12244e-64	-0.108361	0	0	1	NA	NA	NA	NA	0.774181	0.297346	0.384077	7	0.400688	0.612747	1.52924	11	0.541147	682600	494	3.61111	0.439353	0.811892	18	-0.00544422	0.206476	2.64724	0.00811507
1314	MTMR14	1.21949	5.45133	10.8518	0.000987008	0.00978713	1.21959	5.44969	10.8017	0.00101409	0.0164403	1.23726	5.39503	44.3898	2.69e-11	1.39e-10	1.23712	5.39359	44.3799	2.70453e-11	2.41048e-10	NA	NA	NA	NA	NA	NA	NA	NA	NA	NA	NA	NA	NA	NA	NA	NA	NA	NA	NA	NA	NA	NA	NA	NA	NA	NA	NA
1315	CCNC	1.77646	6.30983	26.2858	2.94e-07	1.03e-05	1.77656	6.30821	26.3622	2.8302e-07	1.63144e-05	1.23677	6.41545	91.5235	1.1e-21	1.1e-20	1.23664	6.41401	91.503	1.11421e-21	1.91555e-20	NA	NA	NA	NA	NA	NA	NA	NA	NA	NA	NA	NA	1.91779	0	0	1	1.91779	69599.3	283	4	0	0	1	0.0704767	1.99355	0.926648	0.354109
1316	BCCIP	1.49589	6.13197	15.1619	9.87e-05	0.00156524	1.49599	6.13034	15.1851	9.74689e-05	0.00254471	1.23657	6.25628	81.8191	1.49e-19	1.31e-18	1.23644	6.25484	81.8008	1.50519e-19	2.29519e-18	NA	NA	NA	NA	0.431284	0	0	1	0.137765	0.443138	3.21664	3	0.419547	1.34008	3.19412	4	0.286998	835370	322	3.57143	0.650304	2.26588	7	0.00064566	0.401613	0.713005	0.475842
1317	DNAJC2	1.14952	5.07045	9.28149	0.00231481	0.0185487	1.14962	5.06881	9.23399	0.00237563	0.0310692	1.23455	5.22432	39.0807	4.07e-10	1.91e-09	1.23442	5.22288	39.072	4.08469e-10	3.32126e-09	NA	NA	NA	NA	NA	NA	NA	NA	NA	NA	NA	NA	NA	NA	NA	NA	NA	NA	NA	NA	NA	NA	NA	NA	NA	NA	NA
1318	DNAH10	1.27858	1.91784	1.42939	0.231865	0.438557	1.27865	1.9162	1.42316	0.232884	0.698985	1.23347	1.53176	1.44039	0.230077	0.289411	1.23335	1.53034	1.4401	0.230124	0.485706	NA	NA	NA	NA	NA	NA	NA	NA	NA	NA	NA	NA	NA	NA	NA	NA	NA	NA	NA	NA	NA	NA	NA	NA	NA	NA	NA
1319	PHAX	1.68694	5.82787	22.7457	1.85e-06	5.19e-05	1.68705	5.82624	22.7308	1.8636e-06	8.61882e-05	1.22825	5.75792	56.7866	4.86e-14	3.03e-13	1.22811	5.75648	56.7739	4.88924e-14	5.27882e-13	NA	NA	NA	NA	NA	NA	NA	NA	0.545411	0.0959471	0.175917	2	0.253758	0.109514	0.431568	2	0.406368	893633	394	3.5	0.188923	0.464907	4	0.0166569	0.593383	0.656761	0.511335
1320	ZFP37	1.21462	3.67232	5.59274	0.0180351	0.0818451	1.21475	3.67069	5.53917	0.0185954	0.137456	1.2276	3.50011	10.4981	0.00119497	0.00253753	1.22747	3.49868	10.4958	0.00119648	0.00439782	NA	NA	NA	NA	NA	NA	NA	NA	NA	NA	NA	NA	NA	NA	NA	NA	NA	NA	NA	NA	NA	NA	NA	NA	NA	NA	NA
1321	STK35	1.36553	5.93623	15.3064	9.14e-05	0.00147496	1.36563	5.9346	15.3181	9.08407e-05	0.00240146	1.22709	5.61311	51.1308	8.64e-13	4.99e-12	1.22696	5.61167	51.1192	8.69219e-13	8.68518e-12	NA	NA	NA	NA	NA	NA	NA	NA	NA	NA	NA	NA	NA	NA	NA	NA	NA	NA	NA	NA	NA	NA	NA	NA	NA	NA	NA
1322	CDC40	1.15626	5.90098	10.8484	0.000988826	0.00979006	1.15637	5.89935	10.8517	0.000987076	0.0160642	1.22699	5.77993	57.5766	3.25e-14	2.05e-13	1.22686	5.77849	57.5636	3.27222e-14	3.57886e-13	NA	NA	NA	NA	NA	NA	NA	NA	NA	NA	NA	NA	-0.435525	0.902797	-2.07289	2	-0.435525	157563	579	4	0.902797	-2.07289	2	0.119757	1.46459	-0.379138	0.704585
1323	ME1	0.138084	4.96873	0.146509	0.701894	0.83263	0.138181	4.96708	0.146051	0.702338	1	1.22664	4.40122	21.0814	4.4e-06	1.36e-05	1.22651	4.39978	21.0767	4.41257e-06	2.36389e-05	NA	NA	NA	NA	NA	NA	NA	NA	0.269445	0.458221	1.70061	2	NA	NA	NA	NA	0.269445	467155	572	3	0.458221	1.70061	2	0.0983837	1.42144	0.120344	0.904211
1324	RAB33B	0.953866	3.02275	2.43712	0.118493	0.287345	0.953946	3.02111	2.42219	0.119627	0.467431	1.2257	2.76614	5.61265	0.0178312	0.0299197	1.22557	2.76471	5.61142	0.0178438	0.0517914	NA	NA	NA	NA	NA	NA	NA	NA	NA	NA	NA	NA	NA	NA	NA	NA	NA	NA	NA	NA	NA	NA	NA	NA	NA	NA	NA
1325	GADD45A	-0.642161	7.01054	1.17768	0.27783	0.489945	-0.642089	7.0089	1.1761	0.278152	0.773816	1.22513	6.47283	93.6643	3.74e-22	3.82e-21	1.22499	6.47139	93.6432	3.77856e-22	6.67609e-21	NA	NA	NA	NA	NA	NA	NA	NA	NA	NA	NA	NA	NA	NA	NA	NA	NA	NA	NA	NA	NA	NA	NA	NA	NA	NA	NA
1326	UVRAG	0.617548	4.63665	2.54175	0.110872	0.275708	0.617642	4.63501	2.53569	0.111298	0.448153	1.2243	4.49982	22.6188	1.98e-06	6.4e-06	1.22417	4.49838	22.6137	1.98067e-06	1.11026e-05	NA	NA	NA	NA	NA	NA	NA	NA	NA	NA	NA	NA	NA	NA	NA	NA	NA	NA	NA	NA	NA	NA	NA	NA	NA	NA	NA
1327	EPHA4	1.54544	5.56017	6.90254	0.00860733	0.048319	1.54554	5.55855	6.87819	0.00872541	0.079969	1.22428	5.74125	55.7905	8.06e-14	4.95e-13	1.22415	5.73981	55.7779	8.11397e-14	8.61465e-13	NA	NA	NA	NA	NA	NA	NA	NA	NA	NA	NA	NA	NA	NA	NA	NA	NA	NA	NA	NA	NA	NA	NA	NA	NA	NA	NA
1328	DDX26B	0.560564	3.7266	1.17975	0.277407	0.489556	0.560702	3.72496	1.17164	0.279065	0.774882	1.2241	3.80676	13.325	0.000261892	0.00062332	1.22397	3.80533	13.322	0.000262309	0.0010804	NA	NA	NA	NA	NA	NA	NA	NA	NA	NA	NA	NA	NA	NA	NA	NA	NA	NA	NA	NA	NA	NA	NA	NA	NA	NA	NA
1329	GLI3	-0.0887023	4.83672	0.0170607	0.896079	0.946335	-0.0885749	4.83506	0.0169634	0.896374	1	1.22403	4.27161	19.0478	1.27e-05	3.71e-05	1.2239	4.27017	19.0436	1.27769e-05	6.43369e-05	NA	NA	NA	NA	NA	NA	NA	NA	NA	NA	NA	NA	NA	NA	NA	NA	NA	NA	NA	NA	NA	NA	NA	NA	NA	NA	NA
1330	GATA3	-0.361338	3.91774	0.121002	0.72795	0.848009	-0.361277	3.9161	0.120486	0.728508	1	1.2236	2.47614	4.26859	0.0388232	0.0602216	1.22347	2.47471	4.26765	0.0388446	0.104036	NA	NA	NA	NA	NA	NA	NA	NA	NA	NA	NA	NA	NA	NA	NA	NA	NA	NA	NA	NA	NA	NA	NA	NA	NA	NA	NA
1331	FNBP1L	1.41183	6.61792	12.9929	0.000312667	0.00389652	1.41191	6.6163	13.0122	0.000309467	0.00633475	1.22329	6.7989	117.309	2.46e-27	3.03e-26	1.22316	6.79746	117.282	2.48995e-27	5.30862e-26	NA	NA	NA	NA	NA	NA	NA	NA	5.43103	4.33344	0.797903	2	-2.76089	4.49465	-1.62797	3	-0.603326	763060	609	3.6	3.85848	-6.39535	5	-0.0044155	0.449798	-1.33151	0.183022
1332	GAPVD1	1.0467	6.66255	9.17795	0.00244948	0.0194008	1.0468	6.66091	9.20501	0.00241354	0.0314477	1.2227	6.65982	106.367	6.13e-25	6.89e-24	1.22257	6.65838	106.343	6.20136e-25	1.20717e-23	0.0176287	0	0	1	-0.04416	1.26799	-28.7136	5	0.031385	1.07275	34.1804	16	0.756513	1.714	2.26566	22	0.415813	549833	1487	3.57895	1.14654	2.75735	38	0.00333837	0.132238	3.11919	0.00181348
1333	ARHGAP5	0.653706	7.27415	2.72848	0.0985734	0.255184	0.65382	7.27251	2.73454	0.0981998	0.413366	1.22188	7.03335	137.765	8.2e-32	1.19e-30	1.22174	7.0319	137.734	8.33238e-32	2.09735e-30	NA	NA	NA	NA	NA	NA	NA	NA	NA	NA	NA	NA	NA	NA	NA	NA	NA	NA	NA	NA	NA	NA	NA	NA	NA	NA	NA
1334	KCNJ14	0.921512	1.75154	0.624851	0.42925	0.631936	0.921641	1.74989	0.621844	0.430363	0.971167	1.21994	1.65969	1.69362	0.193124	0.248037	1.21982	1.65827	1.69327	0.19317	0.419796	NA	NA	NA	NA	NA	NA	NA	NA	NA	NA	NA	NA	NA	NA	NA	NA	NA	NA	NA	NA	NA	NA	NA	NA	NA	NA	NA
1335	SORL1	0.895441	1.57006	0.428198	0.512875	0.70037	0.895642	1.56842	0.424426	0.514737	1	1.2188	1.71274	1.81522	0.177884	0.231447	1.21868	1.71131	1.81484	0.177929	0.392635	NA	NA	NA	NA	NA	NA	NA	NA	NA	NA	NA	NA	-7.47258	0	0	1	-7.47258	726637	2214	4	0	0	1	0.101711	1.85748	-4.07772	4.54799e-05
1336	MCC	0.303263	5.98761	0.299733	0.58405	0.753029	0.30339	5.98596	0.299562	0.584157	1	1.21841	5.07198	34.1672	5.06e-09	2.16e-08	1.21827	5.07054	34.1595	5.07747e-09	3.74632e-08	NA	NA	NA	NA	NA	NA	NA	NA	NA	NA	NA	NA	NA	NA	NA	NA	NA	NA	NA	NA	NA	NA	NA	NA	NA	NA	NA
1337	CCNH	1.0676	4.85301	7.62555	0.00575473	0.0366504	1.06769	4.85138	7.60194	0.00583056	0.0605469	1.21834	5.00788	32.6041	1.13e-08	4.65e-08	1.21821	5.00644	32.5967	1.13405e-08	8.08944e-08	NA	NA	NA	NA	NA	NA	NA	NA	NA	NA	NA	NA	NA	NA	NA	NA	NA	NA	NA	NA	NA	NA	NA	NA	NA	NA	NA
1338	INTS12	1.2224	5.05881	10.0703	0.00150676	0.0135419	1.22249	5.05717	10.019	0.0015493	0.0227033	1.21832	4.9279	30.7542	2.93e-08	1.15e-07	1.21819	4.92646	30.7473	2.93919e-08	2.00549e-07	NA	NA	NA	NA	NA	NA	NA	NA	NA	NA	NA	NA	NA	NA	NA	NA	NA	NA	NA	NA	NA	NA	NA	NA	NA	NA	NA
1339	TEFM	1.3968	3.6253	7.55938	0.00596985	0.0377309	1.39688	3.62367	7.49409	0.00619019	0.063385	1.21757	3.47332	10.1207	0.00146616	0.00307262	1.21744	3.47189	10.1184	0.00146797	0.00532503	NA	NA	NA	NA	NA	NA	NA	NA	NA	NA	NA	NA	NA	NA	NA	NA	NA	NA	NA	NA	NA	NA	NA	NA	NA	NA	NA
1340	FOXJ3	1.14463	6.87194	10.3129	0.00132102	0.0122192	1.14474	6.8703	10.3427	0.00129988	0.0198356	1.2167	6.71913	109.873	1.04e-25	1.21e-24	1.21657	6.71769	109.848	1.05796e-25	2.12228e-24	NA	NA	NA	NA	NA	NA	NA	NA	NA	NA	NA	NA	NA	NA	NA	NA	NA	NA	NA	NA	NA	NA	NA	NA	NA	NA	NA
1341	TMEM71	1.629	1.48501	1.13314	0.287107	0.500355	1.62903	1.48337	1.12483	0.288882	0.791573	1.21608	2.18504	3.14587	0.0761193	0.109833	1.21596	2.18361	3.14519	0.0761513	0.18879	NA	NA	NA	NA	NA	NA	NA	NA	NA	NA	NA	NA	NA	NA	NA	NA	NA	NA	NA	NA	NA	NA	NA	NA	NA	NA	NA
1342	TLK2	0.99327	6.34992	8.30251	0.00395903	0.0281155	0.993375	6.34829	8.326	0.00390815	0.0454612	1.21504	6.13078	72.531	1.64e-17	1.27e-16	1.21491	6.12934	72.5145	1.65812e-17	2.21676e-16	NA	NA	NA	NA	NA	NA	NA	NA	NA	NA	NA	NA	NA	NA	NA	NA	NA	NA	NA	NA	NA	NA	NA	NA	NA	NA	NA
1343	AFTPH	1.16124	5.45816	11.0195	0.000901589	0.009123	1.16133	5.45653	10.9662	0.000927869	0.0152779	1.21484	5.39492	42.9259	5.69e-11	2.85e-10	1.2147	5.39348	42.9161	5.71381e-11	4.96022e-10	NA	NA	NA	NA	NA	NA	NA	NA	NA	NA	NA	NA	NA	NA	NA	NA	NA	NA	NA	NA	NA	NA	NA	NA	NA	NA	NA
1344	CSRNP1	0.462749	4.59696	0.616192	0.432466	0.634056	0.462835	4.59532	0.614399	0.433136	0.97377	1.21475	5.42683	43.9207	3.42e-11	1.75e-10	1.21462	5.4254	43.9107	3.43701e-11	3.04142e-10	NA	NA	NA	NA	NA	NA	NA	NA	NA	NA	NA	NA	NA	NA	NA	NA	NA	NA	NA	NA	NA	NA	NA	NA	NA	NA	NA
1345	RINT1	1.18259	5.46288	8.61992	0.00332506	0.0246618	1.18269	5.46125	8.58473	0.00338993	0.0410422	1.21448	5.6365	51.0135	9.17e-13	5.28e-12	1.21435	5.63506	51.0019	9.22754e-13	9.20261e-12	NA	NA	NA	NA	NA	NA	NA	NA	NA	NA	NA	NA	1.4062	0	0	1	1.4062	390060	792	4	0	0	1	0.0962352	2.21396	0.591686	0.554061
1346	PRPF39	1.29208	5.48234	11.6844	0.000630268	0.00690449	1.29218	5.48071	11.6351	0.000647173	0.0115313	1.2144	5.77816	56.43	5.82e-14	3.61e-13	1.21426	5.77672	56.4172	5.86163e-14	6.29318e-13	NA	NA	NA	NA	NA	NA	NA	NA	NA	NA	NA	NA	NA	NA	NA	NA	NA	NA	NA	NA	NA	NA	NA	NA	NA	NA	NA
1347	C18orf8	1.03474	4.59312	7.10947	0.00766779	0.0448049	1.03483	4.59148	7.09252	0.00774063	0.0738712	1.21421	4.73621	26.5516	2.57e-07	9.14e-07	1.21408	4.73477	26.5456	2.5739e-07	1.5864e-06	NA	NA	NA	NA	NA	NA	NA	NA	NA	NA	NA	NA	NA	NA	NA	NA	NA	NA	NA	NA	NA	NA	NA	NA	NA	NA	NA
1348	PCDH7	2.57399	5.15332	4.37873	0.0363901	0.132958	2.57407	5.1517	4.36446	0.0366961	0.218691	1.2138	5.45906	44.8816	2.09e-11	1.09e-10	1.21367	5.45762	44.8714	2.10404e-11	1.8913e-10	NA	NA	NA	NA	NA	NA	NA	NA	NA	NA	NA	NA	NA	NA	NA	NA	NA	NA	NA	NA	NA	NA	NA	NA	NA	NA	NA
1349	PDGFA	1.09546	6.20402	7.73955	0.00540244	0.0349365	1.09555	6.20239	7.74799	0.00537724	0.0572059	1.2132	5.547	47.7646	4.81e-12	2.61e-11	1.21306	5.54556	47.7537	4.83272e-12	4.52984e-11	NA	NA	NA	NA	NA	NA	NA	NA	NA	NA	NA	NA	NA	NA	NA	NA	NA	NA	NA	NA	NA	NA	NA	NA	NA	NA	NA
1350	KCTD5	0.964872	5.82867	8.10303	0.00441912	0.030409	0.964971	5.82704	8.09889	0.00442923	0.0498953	1.21282	6.16691	74.156	7.22e-18	5.73e-17	1.21268	6.16547	74.1391	7.28023e-18	9.99986e-17	-1.11372	0	0	1	0.565484	0	0	1	0.166611	0	0	1	1.00496	0	0	1	0.585785	1.09779e+06	234	3.5	0.419174	0.715577	2	0.106077	1.46561	0.32731	0.743433
1351	PIP4K2C	NA	NA	NA	NA	NA	0.000332985	4.63743	2.56943e-07	0.999596	1	1.21258	3.10619	7.41041	0.00648474	0.0119881	1.21245	3.10476	7.40875	0.00649073	0.020767	NA	NA	NA	NA	NA	NA	NA	NA	NA	NA	NA	NA	NA	NA	NA	NA	NA	NA	NA	NA	NA	NA	NA	NA	NA	NA	NA
1352	SLC30A1	-0.568788	4.75892	1.19242	0.274843	0.486948	-0.568677	4.75726	1.18872	0.275587	0.76992	1.21223	4.49158	22.0771	2.62e-06	8.37e-06	1.2121	4.49015	22.0721	2.62601e-06	1.45228e-05	NA	NA	NA	NA	NA	NA	NA	NA	0.784998	2.03695	2.59485	3	3.77886	0	0	1	1.10725	103346	507	3.25	2.08919	1.88683	4	0.0445033	0.641784	1.65592	0.0977379
1353	RP11-458D21.5	0.455891	2.1987	0.279038	0.597333	0.762132	0.45597	2.19706	0.277855	0.598111	1	1.21083	2.11097	2.88297	0.0895208	0.126541	1.2107	2.10955	2.88234	0.0895558	0.217211	NA	NA	NA	NA	NA	NA	NA	NA	NA	NA	NA	NA	NA	NA	NA	NA	NA	NA	NA	NA	NA	NA	NA	NA	NA	NA	NA
1354	ZNF808	1.00919	3.651	4.24229	0.0394289	0.14047	1.0093	3.64937	4.20531	0.0402977	0.232963	1.20941	3.18998	7.91576	0.00490061	0.00927834	1.20927	3.18855	7.91397	0.00490544	0.0160737	NA	NA	NA	NA	NA	NA	NA	NA	NA	NA	NA	NA	NA	NA	NA	NA	NA	NA	NA	NA	NA	NA	NA	NA	NA	NA	NA
1355	FXR1	1.36876	8.55847	7.25771	0.00705971	0.0424077	1.36889	8.55684	7.2634	0.00703738	0.0692324	1.20845	8.39842	343.479	1.12e-76	4.37e-75	1.20832	8.39697	343.4	1.15978e-76	7.87266e-75	-0.128836	0.702325	-5.45133	10	0.558962	0.769768	1.37714	9	0.701609	1.19161	1.69839	40	0.328558	1.57921	4.80647	56	0.539306	972282	621	3.58333	1.41526	2.62422	96	-0.00256208	0.0796871	6.79995	1.04653e-11
1356	TXNL1	0.83253	6.32504	3.31497	0.0686517	0.201776	0.832645	6.3234	3.31653	0.0685865	0.327791	1.20839	6.68794	106.173	6.76e-25	7.57e-24	1.20826	6.6865	106.149	6.84044e-25	1.32667e-23	-0.560337	1.30702	-2.33256	5	-0.341798	0.795081	-2.32617	9	0.259733	0.531609	2.04675	26	0.39638	0.710753	1.79311	29	0.334693	1.01372e+06	289	3.52727	0.624146	1.86483	55	-0.00089556	0.106983	3.13684	0.00170779
1357	BBS5	0.554575	4.47936	2.11626	0.145742	0.328454	0.554673	4.47772	2.1127	0.146082	0.529908	1.20747	3.0517	7.02012	0.00805987	0.0145981	1.20734	3.05027	7.01854	0.00806698	0.025276	NA	NA	NA	NA	NA	NA	NA	NA	NA	NA	NA	NA	NA	NA	NA	NA	NA	NA	NA	NA	NA	NA	NA	NA	NA	NA	NA
1358	ARRDC3	1.16502	6.40743	10.919	0.000951812	0.00950408	1.16513	6.4058	10.9485	0.000936805	0.0154009	1.20727	6.1603	73.1888	1.18e-17	9.19e-17	1.20714	6.15886	73.1721	1.18825e-17	1.6049e-16	NA	NA	NA	NA	NA	NA	NA	NA	NA	NA	NA	NA	NA	NA	NA	NA	NA	NA	NA	NA	NA	NA	NA	NA	NA	NA	NA
[truncated: 19,924 more rows]
